# Supplementary material
Source: publisher site journal article supplement (https://www.dovepress.com/get_supplementary_file.php?f=140221b.xlsx)
Supplement: Supplementary file 1 [file get_supplementary_file.php]

## Sheet: Table S2-High ADH1A-C5-GO
NAME	GS<br> follow link to MSigDB	GS DETAILS	SIZE	ES	NES	NOM p-val	FDR q-val	FWER p-val	RANK AT MAX	LEADING EDGE
GO_REGULATION_OF_PROTEIN_ACTIVATION_CASCADE	GO_REGULATION_OF_PROTEIN_ACTIVATION_CASCADE	Details ...	34	0.698548	2.15128	0	0.060443	0.058	3072	tags=53%, list=10%, signal=59%
GO_ACID_THIOL_LIGASE_ACTIVITY	GO_ACID_THIOL_LIGASE_ACTIVITY	Details ...	19	0.686703	2.10929	0	0.0692906	0.104	1710	tags=37%, list=5%, signal=39%
GO_SECONDARY_METABOLIC_PROCESS	GO_SECONDARY_METABOLIC_PROCESS	Details ...	48	0.601619	2.10586	0	0.0498683	0.109	6243	tags=50%, list=20%, signal=62%
GO_BILE_ACID_METABOLIC_PROCESS	GO_BILE_ACID_METABOLIC_PROCESS	Details ...	35	0.608759	2.08582	0	0.0546426	0.141	3862	tags=46%, list=12%, signal=52%
GO_POSITIVE_REGULATION_OF_LIPID_STORAGE	GO_POSITIVE_REGULATION_OF_LIPID_STORAGE	Details ...	18	0.652331	2.07203	0	0.0538711	0.156	3213	tags=44%, list=10%, signal=49%
GO_POSITIVE_REGULATION_OF_MACROPHAGE_DERIVED_FOAM_CELL_DIFFERENTIATION	GO_POSITIVE_REGULATION_OF_MACROPHAGE_DERIVED_FOAM_CELL_DIFFERENTIATION	Details ...	15	0.730496	2.06878	0	0.0474111	0.162	2775	tags=40%, list=9%, signal=44%
GO_REGULATION_OF_ACUTE_INFLAMMATORY_RESPONSE	GO_REGULATION_OF_ACUTE_INFLAMMATORY_RESPONSE	Details ...	72	0.577396	2.06321	0	0.0438579	0.169	3072	tags=42%, list=10%, signal=46%
GO_ANCHORED_COMPONENT_OF_EXTERNAL_SIDE_OF_PLASMA_MEMBRANE	GO_ANCHORED_COMPONENT_OF_EXTERNAL_SIDE_OF_PLASMA_MEMBRANE	Details ...	21	0.732817	2.0203	0	0.074041	0.257	3073	tags=52%, list=10%, signal=58%
GO_LEUKOTRIENE_BIOSYNTHETIC_PROCESS	GO_LEUKOTRIENE_BIOSYNTHETIC_PROCESS	Details ...	21	0.697027	1.98914	0	0.104944	0.366	2748	tags=43%, list=9%, signal=47%
GO_ANCHORED_COMPONENT_OF_PLASMA_MEMBRANE	GO_ANCHORED_COMPONENT_OF_PLASMA_MEMBRANE	Details ...	40	0.591032	1.98863	0.0019802	0.0954504	0.368	3073	tags=43%, list=10%, signal=47%
GO_BILE_ACID_BIOSYNTHETIC_PROCESS	GO_BILE_ACID_BIOSYNTHETIC_PROCESS	Details ...	20	0.641215	1.94003	0	0.175721	0.515	5409	tags=55%, list=17%, signal=66%
GO_REGULATION_OF_EXCRETION	GO_REGULATION_OF_EXCRETION	Details ...	26	0.631359	1.93366	0	0.174679	0.533	4998	tags=58%, list=16%, signal=68%
GO_STEROID_HYDROXYLASE_ACTIVITY	GO_STEROID_HYDROXYLASE_ACTIVITY	Details ...	31	0.598753	1.92044	0.00407332	0.189923	0.574	6297	tags=48%, list=20%, signal=60%
GO_NEGATIVE_REGULATION_OF_AMINE_TRANSPORT	GO_NEGATIVE_REGULATION_OF_AMINE_TRANSPORT	Details ...	25	0.723012	1.91305	0.00220264	0.192189	0.596	4998	tags=64%, list=16%, signal=76%
GO_BLOOD_COAGULATION_INTRINSIC_PATHWAY	GO_BLOOD_COAGULATION_INTRINSIC_PATHWAY	Details ...	16	0.72076	1.91095	0	0.1848	0.599	4245	tags=50%, list=13%, signal=58%
GO_ISOPRENOID_BINDING	GO_ISOPRENOID_BINDING	Details ...	38	0.566386	1.90854	0	0.178406	0.604	5795	tags=50%, list=18%, signal=61%
GO_MONOOXYGENASE_ACTIVITY	GO_MONOOXYGENASE_ACTIVITY	Details ...	94	0.45948	1.90619	0	0.173152	0.614	4900	tags=34%, list=15%, signal=40%
GO_REGULATION_OF_HUMORAL_IMMUNE_RESPONSE	GO_REGULATION_OF_HUMORAL_IMMUNE_RESPONSE	Details ...	47	0.55156	1.89974	0.00211864	0.175468	0.636	3424	tags=40%, list=11%, signal=45%
GO_BLOOD_MICROPARTICLE	GO_BLOOD_MICROPARTICLE	Details ...	140	0.496762	1.8994	0	0.166653	0.636	3690	tags=36%, list=12%, signal=40%
GO_REGULATION_OF_RENAL_SODIUM_EXCRETION	GO_REGULATION_OF_RENAL_SODIUM_EXCRETION	Details ...	21	0.629661	1.89889	0.00193798	0.159241	0.638	5941	tags=62%, list=19%, signal=76%
GO_INTRINSIC_COMPONENT_OF_EXTERNAL_SIDE_OF_PLASMA_MEMBRANE	GO_INTRINSIC_COMPONENT_OF_EXTERNAL_SIDE_OF_PLASMA_MEMBRANE	Details ...	26	0.613637	1.89359	0.0059761	0.161531	0.654	3073	tags=42%, list=10%, signal=47%
GO_LEUKOTRIENE_METABOLIC_PROCESS	GO_LEUKOTRIENE_METABOLIC_PROCESS	Details ...	31	0.579399	1.89319	0	0.15497	0.655	2748	tags=32%, list=9%, signal=35%
GO_PROTEIN_ACTIVATION_CASCADE	GO_PROTEIN_ACTIVATION_CASCADE	Details ...	92	0.588097	1.8926	0	0.149114	0.656	7871	tags=57%, list=25%, signal=75%
GO_EPOXYGENASE_P450_PATHWAY	GO_EPOXYGENASE_P450_PATHWAY	Details ...	18	0.700695	1.89172	0.00787402	0.144282	0.657	4900	tags=56%, list=15%, signal=66%
GO_REGULATION_OF_DELAYED_RECTIFIER_POTASSIUM_CHANNEL_ACTIVITY	GO_REGULATION_OF_DELAYED_RECTIFIER_POTASSIUM_CHANNEL_ACTIVITY	Details ...	18	0.628732	1.88397	0.00194175	0.152411	0.683	4734	tags=61%, list=15%, signal=72%
GO_NEGATIVE_REGULATION_OF_LIPID_CATABOLIC_PROCESS	GO_NEGATIVE_REGULATION_OF_LIPID_CATABOLIC_PROCESS	Details ...	20	0.590476	1.8628	0.00204918	0.189366	0.741	6474	tags=65%, list=20%, signal=82%
GO_COMPLEMENT_BINDING	GO_COMPLEMENT_BINDING	Details ...	19	0.668349	1.85666	0.00628931	0.194514	0.752	3145	tags=53%, list=10%, signal=58%
GO_NEGATIVE_REGULATION_OF_ANION_TRANSPORT	GO_NEGATIVE_REGULATION_OF_ANION_TRANSPORT	Details ...	32	0.55397	1.85331	0.0043573	0.194844	0.766	4998	tags=44%, list=16%, signal=52%
GO_CARBOXYPEPTIDASE_ACTIVITY	GO_CARBOXYPEPTIDASE_ACTIVITY	Details ...	39	0.558871	1.85115	0.00200803	0.192347	0.771	3157	tags=36%, list=10%, signal=40%
GO_BLOOD_COAGULATION_FIBRIN_CLOT_FORMATION	GO_BLOOD_COAGULATION_FIBRIN_CLOT_FORMATION	Details ...	23	0.633578	1.8446	0	0.199381	0.777	4602	tags=43%, list=14%, signal=51%
GO_QUATERNARY_AMMONIUM_GROUP_BINDING	GO_QUATERNARY_AMMONIUM_GROUP_BINDING	Details ...	48	0.494138	1.84443	0	0.193212	0.777	4134	tags=33%, list=13%, signal=38%
GO_NEGATIVE_REGULATION_OF_BLOOD_PRESSURE	GO_NEGATIVE_REGULATION_OF_BLOOD_PRESSURE	Details ...	42	0.530802	1.83969	0	0.196585	0.785	6914	tags=45%, list=22%, signal=58%
GO_REGULATION_OF_FATTY_ACID_OXIDATION	GO_REGULATION_OF_FATTY_ACID_OXIDATION	Details ...	27	0.530284	1.83449	0.00373134	0.201925	0.794	2572	tags=37%, list=8%, signal=40%
GO_DRUG_METABOLIC_PROCESS	GO_DRUG_METABOLIC_PROCESS	Details ...	38	0.570611	1.83373	0.0136187	0.198064	0.799	3936	tags=42%, list=12%, signal=48%
GO_CHOLESTEROL_HOMEOSTASIS	GO_CHOLESTEROL_HOMEOSTASIS	Details ...	55	0.495952	1.8334	0.002079	0.19303	0.801	4530	tags=38%, list=14%, signal=44%
GO_STEROL_HOMEOSTASIS	GO_STEROL_HOMEOSTASIS	Details ...	55	0.495952	1.8334	0.002079	0.187668	0.801	4530	tags=38%, list=14%, signal=44%
GO_REGULATION_OF_URINE_VOLUME	GO_REGULATION_OF_URINE_VOLUME	Details ...	20	0.616264	1.83234	0.00210084	0.184424	0.803	5684	tags=50%, list=18%, signal=61%
GO_ALDO_KETO_REDUCTASE_NADP_ACTIVITY	GO_ALDO_KETO_REDUCTASE_NADP_ACTIVITY	Details ...	26	0.608661	1.82667	0.00814664	0.189969	0.814	5720	tags=50%, list=18%, signal=61%
GO_SULFATION	GO_SULFATION	Details ...	16	0.627644	1.81699	0.0132325	0.205022	0.837	2849	tags=38%, list=9%, signal=41%
GO_GAS_TRANSPORT	GO_GAS_TRANSPORT	Details ...	16	0.670575	1.81647	0.00630252	0.201124	0.838	3346	tags=44%, list=11%, signal=49%
GO_CELLULAR_RESPONSE_TO_CADMIUM_ION	GO_CELLULAR_RESPONSE_TO_CADMIUM_ION	Details ...	15	0.685918	1.81318	0.00621118	0.20288	0.843	6858	tags=67%, list=22%, signal=85%
GO_PROTEIN_LIPID_COMPLEX	GO_PROTEIN_LIPID_COMPLEX	Details ...	38	0.55417	1.80812	0.00206186	0.208525	0.86	4707	tags=39%, list=15%, signal=46%
GO_NEGATIVE_REGULATION_OF_GLUCOSE_TRANSPORT	GO_NEGATIVE_REGULATION_OF_GLUCOSE_TRANSPORT	Details ...	16	0.617288	1.8022	0.00821355	0.217092	0.868	1976	tags=50%, list=6%, signal=53%
GO_CGMP_METABOLIC_PROCESS	GO_CGMP_METABOLIC_PROCESS	Details ...	21	0.638941	1.80022	0.0116054	0.216156	0.872	9768	tags=71%, list=31%, signal=103%
GO_REGULATION_OF_RENAL_SYSTEM_PROCESS	GO_REGULATION_OF_RENAL_SYSTEM_PROCESS	Details ...	35	0.565167	1.79548	0.00203252	0.22062	0.879	5941	tags=51%, list=19%, signal=63%
GO_ORGAN_MATURATION	GO_ORGAN_MATURATION	Details ...	18	0.588722	1.79339	0.0162933	0.220203	0.883	6043	tags=56%, list=19%, signal=69%
GO_COMPLEMENT_ACTIVATION	GO_COMPLEMENT_ACTIVATION	Details ...	71	0.599821	1.78302	0.0184049	0.237525	0.895	7871	tags=59%, list=25%, signal=78%
GO_ADRENERGIC_RECEPTOR_SIGNALING_PATHWAY	GO_ADRENERGIC_RECEPTOR_SIGNALING_PATHWAY	Details ...	17	0.647334	1.77826	0.0100402	0.244188	0.901	4998	tags=41%, list=16%, signal=49%
GO_NEGATIVE_REGULATION_OF_LIPID_METABOLIC_PROCESS	GO_NEGATIVE_REGULATION_OF_LIPID_METABOLIC_PROCESS	Details ...	76	0.419674	1.77534	0.00194175	0.245601	0.902	6533	tags=41%, list=21%, signal=51%
GO_METALLOCARBOXYPEPTIDASE_ACTIVITY	GO_METALLOCARBOXYPEPTIDASE_ACTIVITY	Details ...	27	0.565565	1.77273	0.00604839	0.24676	0.907	3157	tags=37%, list=10%, signal=41%

## Sheet: Table S3-High ADH1A-C2-KEGG
NAME	GS<br> follow link to MSigDB	GS DETAILS	SIZE	ES	NES	NOM p-val	FDR q-val	FWER p-val	RANK AT MAX	LEADING EDGE
KEGG_COMPLEMENT_AND_COAGULATION_CASCADES	KEGG_COMPLEMENT_AND_COAGULATION_CASCADES	Details ...	67	0.598983	2.0096	0	0.0428563	0.05	4296	tags=45%, list=14%, signal=52%
KEGG_ARACHIDONIC_ACID_METABOLISM	KEGG_ARACHIDONIC_ACID_METABOLISM	Details ...	55	0.528021	1.95987	0	0.0434763	0.086	6243	tags=38%, list=20%, signal=47%
KEGG_DRUG_METABOLISM_CYTOCHROME_P450	KEGG_DRUG_METABOLISM_CYTOCHROME_P450	Details ...	68	0.566406	1.95779	0.00206186	0.0293491	0.088	4126	tags=41%, list=13%, signal=47%
KEGG_FATTY_ACID_METABOLISM	KEGG_FATTY_ACID_METABOLISM	Details ...	42	0.636118	1.92963	0	0.0306623	0.109	3957	tags=48%, list=12%, signal=54%
KEGG_PRIMARY_BILE_ACID_BIOSYNTHESIS	KEGG_PRIMARY_BILE_ACID_BIOSYNTHESIS	Details ...	16	0.68791	1.91802	0	0.0285639	0.12	9323	tags=88%, list=29%, signal=124%
KEGG_METABOLISM_OF_XENOBIOTICS_BY_CYTOCHROME_P450	KEGG_METABOLISM_OF_XENOBIOTICS_BY_CYTOCHROME_P450	Details ...	66	0.557742	1.8882	0.00412371	0.0308465	0.144	4540	tags=42%, list=14%, signal=49%
KEGG_PPAR_SIGNALING_PATHWAY	KEGG_PPAR_SIGNALING_PATHWAY	Details ...	68	0.496396	1.83911	0.00408163	0.0441986	0.204	5984	tags=41%, list=19%, signal=51%
KEGG_RETINOL_METABOLISM	KEGG_RETINOL_METABOLISM	Details ...	61	0.5372	1.797	0.00613497	0.0584141	0.267	3936	tags=33%, list=12%, signal=37%
KEGG_MATURITY_ONSET_DIABETES_OF_THE_YOUNG	KEGG_MATURITY_ONSET_DIABETES_OF_THE_YOUNG	Details ...	25	0.673945	1.7431	0.00414079	0.0868055	0.379	5978	tags=52%, list=19%, signal=64%
KEGG_RENIN_ANGIOTENSIN_SYSTEM	KEGG_RENIN_ANGIOTENSIN_SYSTEM	Details ...	17	0.630921	1.73194	0.0141414	0.0851615	0.388	1567	tags=41%, list=5%, signal=43%
KEGG_NEUROACTIVE_LIGAND_RECEPTOR_INTERACTION	KEGG_NEUROACTIVE_LIGAND_RECEPTOR_INTERACTION	Details ...	251	0.44705	1.71357	0.00204918	0.0910407	0.427	6491	tags=39%, list=20%, signal=49%
KEGG_GLYCINE_SERINE_AND_THREONINE_METABOLISM	KEGG_GLYCINE_SERINE_AND_THREONINE_METABOLISM	Details ...	31	0.592997	1.69174	0.0182556	0.0978383	0.465	6865	tags=61%, list=22%, signal=78%
KEGG_PROXIMAL_TUBULE_BICARBONATE_RECLAMATION	KEGG_PROXIMAL_TUBULE_BICARBONATE_RECLAMATION	Details ...	22	0.587129	1.67567	0.0212766	0.10077	0.495	6850	tags=55%, list=22%, signal=69%
KEGG_VALINE_LEUCINE_AND_ISOLEUCINE_DEGRADATION	KEGG_VALINE_LEUCINE_AND_ISOLEUCINE_DEGRADATION	Details ...	44	0.552995	1.62187	0.0483193	0.1383	0.595	4676	tags=41%, list=15%, signal=48%
KEGG_ALDOSTERONE_REGULATED_SODIUM_REABSORPTION	KEGG_ALDOSTERONE_REGULATED_SODIUM_REABSORPTION	Details ...	41	0.44451	1.58935	0.015625	0.160585	0.654	6972	tags=46%, list=22%, signal=59%
KEGG_BETA_ALANINE_METABOLISM	KEGG_BETA_ALANINE_METABOLISM	Details ...	22	0.516659	1.55728	0.0456432	0.183036	0.71	3387	tags=32%, list=11%, signal=36%
KEGG_PROPANOATE_METABOLISM	KEGG_PROPANOATE_METABOLISM	Details ...	32	0.536318	1.54607	0.0769231	0.183657	0.723	3387	tags=38%, list=11%, signal=42%
KEGG_TRYPTOPHAN_METABOLISM	KEGG_TRYPTOPHAN_METABOLISM	Details ...	39	0.43401	1.50704	0.0435685	0.214439	0.78	4862	tags=36%, list=15%, signal=42%
KEGG_BUTANOATE_METABOLISM	KEGG_BUTANOATE_METABOLISM	Details ...	33	0.472894	1.4785	0.0892116	0.238386	0.817	3387	tags=27%, list=11%, signal=30%

## Sheet: Table S4-High ADH5-C5-GO
NAME	GS<br> follow link to MSigDB	GS DETAILS	SIZE	ES	NES	NOM p-val	FDR q-val	FWER p-val	RANK AT MAX	LEADING EDGE
GO_NEGATIVE_REGULATION_OF_TRANSFORMING_GROWTH_FACTOR_BETA_RECEPTOR_SIGNALING_PATHWAY	GO_NEGATIVE_REGULATION_OF_TRANSFORMING_GROWTH_FACTOR_BETA_RECEPTOR_SIGNALING_PATHWAY	Details ...	64	0.635389	2.31879	0	0.00115866	0.001	3297	tags=44%, list=10%, signal=49%
GO_NEGATIVE_REGULATION_OF_CELLULAR_RESPONSE_TO_TRANSFORMING_GROWTH_FACTOR_BETA_STIMULUS	GO_NEGATIVE_REGULATION_OF_CELLULAR_RESPONSE_TO_TRANSFORMING_GROWTH_FACTOR_BETA_STIMULUS	Details ...	64	0.635389	2.31879	0	0.000579328	0.001	3297	tags=44%, list=10%, signal=49%
GO_EXTRACELLULAR_MATRIX_COMPONENT	GO_EXTRACELLULAR_MATRIX_COMPONENT	Details ...	123	0.680362	2.2943	0	0.000855179	0.002	2990	tags=50%, list=9%, signal=55%
GO_NEGATIVE_REGULATION_OF_CELLULAR_RESPONSE_TO_GROWTH_FACTOR_STIMULUS	GO_NEGATIVE_REGULATION_OF_CELLULAR_RESPONSE_TO_GROWTH_FACTOR_STIMULUS	Details ...	117	0.597904	2.27261	0	0.00322055	0.006	3395	tags=41%, list=11%, signal=46%
GO_CELL_ADHESION_MOLECULE_BINDING	GO_CELL_ADHESION_MOLECULE_BINDING	Details ...	176	0.585623	2.27098	0	0.00278115	0.007	5656	tags=47%, list=18%, signal=56%
GO_NEGATIVE_REGULATION_OF_TRANSMEMBRANE_RECEPTOR_PROTEIN_SERINE_THREONINE_KINASE_SIGNALING_PATHWAY	GO_NEGATIVE_REGULATION_OF_TRANSMEMBRANE_RECEPTOR_PROTEIN_SERINE_THREONINE_KINASE_SIGNALING_PATHWAY	Details ...	100	0.604403	2.2682	0	0.00231763	0.007	5722	tags=50%, list=18%, signal=61%
GO_SMAD_BINDING	GO_SMAD_BINDING	Details ...	69	0.641508	2.2667	0	0.0021566	0.007	4314	tags=49%, list=14%, signal=57%
GO_REGULATION_OF_CHONDROCYTE_DIFFERENTIATION	GO_REGULATION_OF_CHONDROCYTE_DIFFERENTIATION	Details ...	42	0.720032	2.25614	0	0.00267162	0.009	3912	tags=50%, list=12%, signal=57%
GO_REGULATION_OF_CELLULAR_RESPONSE_TO_TRANSFORMING_GROWTH_FACTOR_BETA_STIMULUS	GO_REGULATION_OF_CELLULAR_RESPONSE_TO_TRANSFORMING_GROWTH_FACTOR_BETA_STIMULUS	Details ...	95	0.575054	2.2561	0	0.00250351	0.009	3796	tags=41%, list=12%, signal=46%
GO_REGULATION_OF_TRANSFORMING_GROWTH_FACTOR_BETA_RECEPTOR_SIGNALING_PATHWAY	GO_REGULATION_OF_TRANSFORMING_GROWTH_FACTOR_BETA_RECEPTOR_SIGNALING_PATHWAY	Details ...	95	0.575054	2.2561	0	0.00225316	0.009	3796	tags=41%, list=12%, signal=46%
GO_REGULATION_OF_CARTILAGE_DEVELOPMENT	GO_REGULATION_OF_CARTILAGE_DEVELOPMENT	Details ...	56	0.701422	2.25221	0	0.00204833	0.009	3912	tags=48%, list=12%, signal=55%
GO_INTEGRIN_BINDING	GO_INTEGRIN_BINDING	Details ...	101	0.653755	2.2472	0	0.0021914	0.012	5614	tags=56%, list=18%, signal=68%
GO_CARTILAGE_DEVELOPMENT	GO_CARTILAGE_DEVELOPMENT	Details ...	140	0.579267	2.22302	0	0.0049375	0.028	5490	tags=48%, list=17%, signal=58%
GO_AMINOGLYCAN_BIOSYNTHETIC_PROCESS	GO_AMINOGLYCAN_BIOSYNTHETIC_PROCESS	Details ...	104	0.588517	2.21181	0	0.00612287	0.036	5988	tags=52%, list=19%, signal=64%
GO_SOMITE_DEVELOPMENT	GO_SOMITE_DEVELOPMENT	Details ...	74	0.558583	2.20896	0	0.0059966	0.037	5323	tags=49%, list=17%, signal=58%
GO_HEART_DEVELOPMENT	GO_HEART_DEVELOPMENT	Details ...	446	0.501342	2.20444	0	0.00619107	0.039	5702	tags=41%, list=18%, signal=50%
GO_NEGATIVE_REGULATION_OF_CELL_SUBSTRATE_ADHESION	GO_NEGATIVE_REGULATION_OF_CELL_SUBSTRATE_ADHESION	Details ...	50	0.67103	2.19915	0	0.00626494	0.041	3104	tags=44%, list=10%, signal=49%
GO_APPENDAGE_DEVELOPMENT	GO_APPENDAGE_DEVELOPMENT	Details ...	160	0.539362	2.19911	0	0.00591689	0.041	5031	tags=41%, list=16%, signal=48%
GO_LIMB_DEVELOPMENT	GO_LIMB_DEVELOPMENT	Details ...	160	0.539362	2.19911	0	0.00560547	0.041	5031	tags=41%, list=16%, signal=48%
GO_GROWTH	GO_GROWTH	Details ...	383	0.490829	2.19484	0	0.00565768	0.042	5490	tags=42%, list=17%, signal=51%
GO_POST_ANAL_TAIL_MORPHOGENESIS	GO_POST_ANAL_TAIL_MORPHOGENESIS	Details ...	18	0.740596	2.19366	0	0.00556318	0.042	2206	tags=39%, list=7%, signal=42%
GO_DEVELOPMENTAL_GROWTH	GO_DEVELOPMENTAL_GROWTH	Details ...	313	0.49599	2.19207	0	0.0054136	0.043	5490	tags=43%, list=17%, signal=52%
GO_BASEMENT_MEMBRANE	GO_BASEMENT_MEMBRANE	Details ...	91	0.638637	2.18917	0	0.00552327	0.045	4363	tags=49%, list=14%, signal=57%
GO_EMBRYONIC_DIGIT_MORPHOGENESIS	GO_EMBRYONIC_DIGIT_MORPHOGENESIS	Details ...	59	0.589954	2.18852	0	0.00544716	0.045	3403	tags=41%, list=11%, signal=45%
GO_EPIDERMAL_GROWTH_FACTOR_RECEPTOR_SIGNALING_PATHWAY	GO_EPIDERMAL_GROWTH_FACTOR_RECEPTOR_SIGNALING_PATHWAY	Details ...	53	0.662027	2.18535	0	0.00552554	0.047	3095	tags=43%, list=10%, signal=48%
GO_ENDOPLASMIC_RETICULUM_LUMEN	GO_ENDOPLASMIC_RETICULUM_LUMEN	Details ...	190	0.571675	2.18008	0.00209205	0.00617046	0.053	5353	tags=49%, list=17%, signal=59%
GO_CELLULAR_RESPONSE_TO_AMINO_ACID_STIMULUS	GO_CELLULAR_RESPONSE_TO_AMINO_ACID_STIMULUS	Details ...	48	0.603768	2.16692	0	0.00778355	0.066	3018	tags=38%, list=9%, signal=41%
GO_PALATE_DEVELOPMENT	GO_PALATE_DEVELOPMENT	Details ...	83	0.581394	2.15981	0	0.008509	0.075	5000	tags=43%, list=16%, signal=51%
GO_SKELETAL_SYSTEM_DEVELOPMENT	GO_SKELETAL_SYSTEM_DEVELOPMENT	Details ...	437	0.495623	2.15838	0	0.00849186	0.077	5546	tags=39%, list=17%, signal=47%
GO_MORPHOGENESIS_OF_AN_EPITHELIUM	GO_MORPHOGENESIS_OF_AN_EPITHELIUM	Details ...	388	0.481799	2.15817	0	0.00827465	0.077	5772	tags=40%, list=18%, signal=48%
GO_PERICARDIUM_DEVELOPMENT	GO_PERICARDIUM_DEVELOPMENT	Details ...	17	0.782335	2.1504	0	0.00894631	0.084	3659	tags=65%, list=12%, signal=73%
GO_REGULATION_OF_TRANSMEMBRANE_RECEPTOR_PROTEIN_SERINE_THREONINE_KINASE_SIGNALING_PATHWAY	GO_REGULATION_OF_TRANSMEMBRANE_RECEPTOR_PROTEIN_SERINE_THREONINE_KINASE_SIGNALING_PATHWAY	Details ...	199	0.50807	2.1473	0	0.00930556	0.087	5585	tags=42%, list=18%, signal=51%
GO_EXTRACELLULAR_MATRIX_STRUCTURAL_CONSTITUENT	GO_EXTRACELLULAR_MATRIX_STRUCTURAL_CONSTITUENT	Details ...	71	0.665641	2.14335	0.0019802	0.00928894	0.089	1857	tags=44%, list=6%, signal=46%
GO_POSITIVE_REGULATION_OF_OSSIFICATION	GO_POSITIVE_REGULATION_OF_OSSIFICATION	Details ...	80	0.599237	2.14295	0	0.00914082	0.089	5353	tags=45%, list=17%, signal=54%
GO_CONNECTIVE_TISSUE_DEVELOPMENT	GO_CONNECTIVE_TISSUE_DEVELOPMENT	Details ...	185	0.543781	2.14228	0	0.00896952	0.091	5490	tags=44%, list=17%, signal=53%
GO_HIPPO_SIGNALING	GO_HIPPO_SIGNALING	Details ...	27	0.778547	2.14203	0	0.00872037	0.091	3579	tags=56%, list=11%, signal=63%
GO_EMBRYONIC_EYE_MORPHOGENESIS	GO_EMBRYONIC_EYE_MORPHOGENESIS	Details ...	33	0.652678	2.14074	0	0.00866842	0.092	3521	tags=45%, list=11%, signal=51%
GO_DIGESTIVE_TRACT_MORPHOGENESIS	GO_DIGESTIVE_TRACT_MORPHOGENESIS	Details ...	47	0.607617	2.1393	0	0.00870773	0.095	4171	tags=43%, list=13%, signal=49%
GO_PROTEINACEOUS_EXTRACELLULAR_MATRIX	GO_PROTEINACEOUS_EXTRACELLULAR_MATRIX	Details ...	342	0.561282	2.13536	0.00195695	0.00898039	0.102	4675	tags=40%, list=15%, signal=47%
GO_VASCULATURE_DEVELOPMENT	GO_VASCULATURE_DEVELOPMENT	Details ...	455	0.530852	2.13437	0	0.00886812	0.104	7174	tags=49%, list=23%, signal=63%
GO_FORMATION_OF_PRIMARY_GERM_LAYER	GO_FORMATION_OF_PRIMARY_GERM_LAYER	Details ...	109	0.577002	2.13253	0	0.00899095	0.108	5420	tags=45%, list=17%, signal=54%
GO_CHONDROCYTE_DEVELOPMENT	GO_CHONDROCYTE_DEVELOPMENT	Details ...	21	0.802857	2.13033	0	0.00893858	0.109	1271	tags=62%, list=4%, signal=64%
GO_EXTRACELLULAR_MATRIX	GO_EXTRACELLULAR_MATRIX	Details ...	408	0.548059	2.12959	0	0.00893443	0.11	4675	tags=39%, list=15%, signal=45%
GO_PHOSPHATIDYLINOSITOL_4_PHOSPHATE_BINDING	GO_PHOSPHATIDYLINOSITOL_4_PHOSPHATE_BINDING	Details ...	20	0.733019	2.12814	0	0.00897419	0.113	5019	tags=60%, list=16%, signal=71%
GO_MESODERM_MORPHOGENESIS	GO_MESODERM_MORPHOGENESIS	Details ...	65	0.589471	2.12791	0	0.00880288	0.113	5420	tags=45%, list=17%, signal=54%
GO_REGULATION_OF_ADHERENS_JUNCTION_ORGANIZATION	GO_REGULATION_OF_ADHERENS_JUNCTION_ORGANIZATION	Details ...	49	0.633121	2.12778	0	0.00865446	0.113	3104	tags=41%, list=10%, signal=45%
GO_CRANIAL_SKELETAL_SYSTEM_DEVELOPMENT	GO_CRANIAL_SKELETAL_SYSTEM_DEVELOPMENT	Details ...	54	0.612371	2.12614	0	0.00863099	0.114	4422	tags=43%, list=14%, signal=49%
GO_NEGATIVE_REGULATION_OF_EPITHELIAL_CELL_PROLIFERATION	GO_NEGATIVE_REGULATION_OF_EPITHELIAL_CELL_PROLIFERATION	Details ...	110	0.498901	2.12591	0	0.00852397	0.115	4137	tags=35%, list=13%, signal=41%
GO_POSITIVE_REGULATION_OF_CARTILAGE_DEVELOPMENT	GO_POSITIVE_REGULATION_OF_CARTILAGE_DEVELOPMENT	Details ...	26	0.707318	2.12174	0	0.00882718	0.121	1268	tags=35%, list=4%, signal=36%
GO_TUBE_MORPHOGENESIS	GO_TUBE_MORPHOGENESIS	Details ...	318	0.475612	2.12106	0	0.00872692	0.123	5420	tags=39%, list=17%, signal=47%
GO_SUBSTRATE_ADHESION_DEPENDENT_CELL_SPREADING	GO_SUBSTRATE_ADHESION_DEPENDENT_CELL_SPREADING	Details ...	38	0.683679	2.11973	0	0.00860893	0.124	4933	tags=61%, list=16%, signal=72%
GO_BONE_DEVELOPMENT	GO_BONE_DEVELOPMENT	Details ...	151	0.533501	2.1175	0	0.00865995	0.125	4610	tags=41%, list=15%, signal=48%
GO_UROGENITAL_SYSTEM_DEVELOPMENT	GO_UROGENITAL_SYSTEM_DEVELOPMENT	Details ...	296	0.473595	2.11576	0	0.00869607	0.127	5353	tags=37%, list=17%, signal=44%
GO_CELL_GROWTH	GO_CELL_GROWTH	Details ...	127	0.526084	2.11481	0	0.00856248	0.128	4954	tags=41%, list=16%, signal=48%
GO_PLASMA_MEMBRANE_RAFT	GO_PLASMA_MEMBRANE_RAFT	Details ...	85	0.560404	2.1131	0	0.00863518	0.131	4756	tags=42%, list=15%, signal=50%
GO_EXTRACELLULAR_STRUCTURE_ORGANIZATION	GO_EXTRACELLULAR_STRUCTURE_ORGANIZATION	Details ...	295	0.570718	2.11015	0	0.00867961	0.134	4380	tags=41%, list=14%, signal=48%
GO_COLLAGEN_BINDING	GO_COLLAGEN_BINDING	Details ...	59	0.68051	2.10815	0	0.00877306	0.136	4829	tags=61%, list=15%, signal=72%
GO_DIGESTIVE_SYSTEM_DEVELOPMENT	GO_DIGESTIVE_SYSTEM_DEVELOPMENT	Details ...	140	0.506398	2.10675	0	0.00888689	0.14	4882	tags=36%, list=15%, signal=42%
GO_POSITIVE_REGULATION_OF_OSTEOBLAST_DIFFERENTIATION	GO_POSITIVE_REGULATION_OF_OSTEOBLAST_DIFFERENTIATION	Details ...	57	0.620983	2.10646	0	0.00882993	0.141	5353	tags=51%, list=17%, signal=61%
GO_COLLAGEN_FIBRIL_ORGANIZATION	GO_COLLAGEN_FIBRIL_ORGANIZATION	Details ...	37	0.793408	2.10314	0	0.00927239	0.146	3251	tags=68%, list=10%, signal=75%
GO_SOMITOGENESIS	GO_SOMITOGENESIS	Details ...	59	0.540251	2.09938	0	0.00980236	0.153	5323	tags=47%, list=17%, signal=57%
GO_RETROMER_COMPLEX	GO_RETROMER_COMPLEX	Details ...	21	0.711984	2.09841	0	0.00989251	0.154	2891	tags=52%, list=9%, signal=58%
GO_REGULATION_OF_CELLULAR_RESPONSE_TO_GROWTH_FACTOR_STIMULUS	GO_REGULATION_OF_CELLULAR_RESPONSE_TO_GROWTH_FACTOR_STIMULUS	Details ...	219	0.508633	2.0977	0	0.00996223	0.158	5722	tags=43%, list=18%, signal=53%
GO_MESENCHYME_MORPHOGENESIS	GO_MESENCHYME_MORPHOGENESIS	Details ...	38	0.633912	2.09714	0	0.00992595	0.159	5000	tags=45%, list=16%, signal=53%
GO_MORPHOGENESIS_OF_AN_EPITHELIAL_SHEET	GO_MORPHOGENESIS_OF_AN_EPITHELIAL_SHEET	Details ...	40	0.621681	2.09495	0	0.0101822	0.163	3659	tags=38%, list=12%, signal=42%
GO_OSSIFICATION	GO_OSSIFICATION	Details ...	242	0.517729	2.09302	0	0.0104154	0.166	5527	tags=43%, list=17%, signal=52%
GO_ERBB_SIGNALING_PATHWAY	GO_ERBB_SIGNALING_PATHWAY	Details ...	77	0.580458	2.09048	0	0.0105705	0.168	3095	tags=36%, list=10%, signal=40%
GO_NEGATIVE_REGULATION_OF_PROTEIN_LOCALIZATION_TO_CELL_PERIPHERY	GO_NEGATIVE_REGULATION_OF_PROTEIN_LOCALIZATION_TO_CELL_PERIPHERY	Details ...	20	0.729511	2.08893	0	0.010684	0.169	4073	tags=65%, list=13%, signal=75%
GO_NEGATIVE_REGULATION_OF_PROTEIN_LOCALIZATION_TO_PLASMA_MEMBRANE	GO_NEGATIVE_REGULATION_OF_PROTEIN_LOCALIZATION_TO_PLASMA_MEMBRANE	Details ...	20	0.729511	2.08893	0	0.0105292	0.169	4073	tags=65%, list=13%, signal=75%
GO_MUCOPOLYSACCHARIDE_METABOLIC_PROCESS	GO_MUCOPOLYSACCHARIDE_METABOLIC_PROCESS	Details ...	105	0.544356	2.08708	0	0.0106565	0.17	5671	tags=46%, list=18%, signal=55%
GO_REGULATION_OF_CYTOSKELETON_ORGANIZATION	GO_REGULATION_OF_CYTOSKELETON_ORGANIZATION	Details ...	475	0.468882	2.08519	0	0.0107426	0.173	4685	tags=36%, list=15%, signal=42%
GO_SPINDLE_POLE	GO_SPINDLE_POLE	Details ...	113	0.58506	2.08484	0	0.0106486	0.174	5747	tags=56%, list=18%, signal=68%
GO_PHOSPHATIDYLSERINE_BINDING	GO_PHOSPHATIDYLSERINE_BINDING	Details ...	33	0.609413	2.08194	0	0.0110444	0.181	7654	tags=61%, list=24%, signal=80%
GO_BLOOD_VESSEL_MORPHOGENESIS	GO_BLOOD_VESSEL_MORPHOGENESIS	Details ...	354	0.525349	2.07917	0	0.0115606	0.187	5394	tags=40%, list=17%, signal=48%
GO_CELL_SUBSTRATE_ADHESION	GO_CELL_SUBSTRATE_ADHESION	Details ...	161	0.538155	2.07614	0	0.0119573	0.19	4552	tags=40%, list=14%, signal=46%
GO_NEGATIVE_REGULATION_OF_EMBRYONIC_DEVELOPMENT	GO_NEGATIVE_REGULATION_OF_EMBRYONIC_DEVELOPMENT	Details ...	26	0.668397	2.07453	0.00207469	0.0121027	0.194	2469	tags=42%, list=8%, signal=46%
GO_EMBRYONIC_PATTERN_SPECIFICATION	GO_EMBRYONIC_PATTERN_SPECIFICATION	Details ...	56	0.542648	2.06865	0	0.0131146	0.207	5323	tags=41%, list=17%, signal=49%
GO_WNT_SIGNALING_PATHWAY	GO_WNT_SIGNALING_PATHWAY	Details ...	332	0.472789	2.068	0	0.0130739	0.21	4928	tags=37%, list=16%, signal=44%
GO_PROSTATE_GLAND_DEVELOPMENT	GO_PROSTATE_GLAND_DEVELOPMENT	Details ...	41	0.58425	2.0666	0	0.0131744	0.21	5772	tags=49%, list=18%, signal=60%
GO_REGULATION_OF_CELL_SUBSTRATE_ADHESION	GO_REGULATION_OF_CELL_SUBSTRATE_ADHESION	Details ...	166	0.528802	2.06158	0	0.0141569	0.221	6710	tags=46%, list=21%, signal=58%
GO_LAMELLIPODIUM_MEMBRANE	GO_LAMELLIPODIUM_MEMBRANE	Details ...	19	0.753475	2.06146	0	0.0139821	0.221	990	tags=37%, list=3%, signal=38%
GO_REGULATION_OF_MICROTUBULE_BASED_PROCESS	GO_REGULATION_OF_MICROTUBULE_BASED_PROCESS	Details ...	227	0.526256	2.0614	0	0.0138256	0.221	5999	tags=50%, list=19%, signal=61%
GO_KERATAN_SULFATE_METABOLIC_PROCESS	GO_KERATAN_SULFATE_METABOLIC_PROCESS	Details ...	32	0.649071	2.06039	0	0.0139136	0.223	6413	tags=63%, list=20%, signal=78%
GO_BRANCHING_MORPHOGENESIS_OF_AN_EPITHELIAL_TUBE	GO_BRANCHING_MORPHOGENESIS_OF_AN_EPITHELIAL_TUBE	Details ...	130	0.523299	2.06003	0	0.0138111	0.223	5286	tags=39%, list=17%, signal=47%
GO_PEPTIDASE_ACTIVATOR_ACTIVITY	GO_PEPTIDASE_ACTIVATOR_ACTIVITY	Details ...	36	0.626007	2.05916	0	0.0137689	0.225	4661	tags=53%, list=15%, signal=62%
GO_CHONDROCYTE_DIFFERENTIATION	GO_CHONDROCYTE_DIFFERENTIATION	Details ...	59	0.595594	2.0575	0	0.0139156	0.229	3288	tags=37%, list=10%, signal=42%
GO_ANTIGEN_PROCESSING_AND_PRESENTATION_OF_PEPTIDE_OR_POLYSACCHARIDE_ANTIGEN_VIA_MHC_CLASS_II	GO_ANTIGEN_PROCESSING_AND_PRESENTATION_OF_PEPTIDE_OR_POLYSACCHARIDE_ANTIGEN_VIA_MHC_CLASS_II	Details ...	87	0.569466	2.05634	0	0.0140907	0.232	5211	tags=47%, list=16%, signal=56%
GO_ANTIGEN_PROCESSING_AND_PRESENTATION_OF_PEPTIDE_ANTIGEN_VIA_MHC_CLASS_II	GO_ANTIGEN_PROCESSING_AND_PRESENTATION_OF_PEPTIDE_ANTIGEN_VIA_MHC_CLASS_II	Details ...	87	0.569466	2.05634	0	0.0139306	0.232	5211	tags=47%, list=16%, signal=56%
GO_REGULATION_OF_CELL_MATRIX_ADHESION	GO_REGULATION_OF_CELL_MATRIX_ADHESION	Details ...	87	0.565376	2.05566	0	0.013961	0.236	3104	tags=36%, list=10%, signal=39%
GO_DEVELOPMENTAL_GROWTH_INVOLVED_IN_MORPHOGENESIS	GO_DEVELOPMENTAL_GROWTH_INVOLVED_IN_MORPHOGENESIS	Details ...	101	0.53123	2.05469	0	0.0139721	0.238	5403	tags=43%, list=17%, signal=51%
GO_NEGATIVE_REGULATION_OF_CELL_MATRIX_ADHESION	GO_NEGATIVE_REGULATION_OF_CELL_MATRIX_ADHESION	Details ...	28	0.703909	2.05295	0	0.0141674	0.242	3104	tags=50%, list=10%, signal=55%
GO_NEGATIVE_REGULATION_OF_BMP_SIGNALING_PATHWAY	GO_NEGATIVE_REGULATION_OF_BMP_SIGNALING_PATHWAY	Details ...	42	0.648117	2.05226	0	0.0141646	0.243	6830	tags=64%, list=21%, signal=82%
GO_MESONEPHROS_DEVELOPMENT	GO_MESONEPHROS_DEVELOPMENT	Details ...	90	0.510747	2.05179	0	0.0141184	0.243	5254	tags=37%, list=17%, signal=44%
GO_LAMELLIPODIUM	GO_LAMELLIPODIUM	Details ...	166	0.524027	2.04952	0	0.0143333	0.25	4759	tags=40%, list=15%, signal=47%
GO_CEREBRAL_CORTEX_DEVELOPMENT	GO_CEREBRAL_CORTEX_DEVELOPMENT	Details ...	103	0.525356	2.0487	0	0.0143848	0.252	5404	tags=43%, list=17%, signal=51%
GO_SEGMENTATION	GO_SEGMENTATION	Details ...	86	0.5011	2.04715	0	0.0145184	0.256	5323	tags=41%, list=17%, signal=49%
GO_NUCLEOTIDE_SUGAR_METABOLIC_PROCESS	GO_NUCLEOTIDE_SUGAR_METABOLIC_PROCESS	Details ...	33	0.692526	2.04526	0	0.0148588	0.262	4165	tags=55%, list=13%, signal=63%
GO_GASTRULATION	GO_GASTRULATION	Details ...	148	0.493609	2.0427	0	0.0152175	0.268	5566	tags=40%, list=18%, signal=48%
GO_REGULATION_OF_EPITHELIAL_CELL_PROLIFERATION	GO_REGULATION_OF_EPITHELIAL_CELL_PROLIFERATION	Details ...	275	0.463314	2.04226	0	0.0151451	0.268	6485	tags=42%, list=20%, signal=52%
GO_BETA_CATENIN_BINDING	GO_BETA_CATENIN_BINDING	Details ...	80	0.541597	2.04111	0.0020284	0.0152254	0.27	6562	tags=50%, list=21%, signal=63%
GO_NEURAL_TUBE_FORMATION	GO_NEURAL_TUBE_FORMATION		94	0.526554	2.03832	0	0.0156247	0.275	5702	tags=47%, list=18%, signal=57%
GO_GROWTH_FACTOR_BINDING	GO_GROWTH_FACTOR_BINDING		122	0.558531	2.03697	0.00204082	0.0156733	0.278	5412	tags=43%, list=17%, signal=51%
GO_AMINOGLYCAN_METABOLIC_PROCESS	GO_AMINOGLYCAN_METABOLIC_PROCESS		162	0.49776	2.03671	0.00203252	0.0155747	0.279	5700	tags=43%, list=18%, signal=52%
GO_MORPHOGENESIS_OF_A_BRANCHING_STRUCTURE	GO_MORPHOGENESIS_OF_A_BRANCHING_STRUCTURE		165	0.507743	2.03665	0	0.0154557	0.28	5289	tags=38%, list=17%, signal=45%
GO_REGULATION_OF_PROTEIN_COMPLEX_DISASSEMBLY	GO_REGULATION_OF_PROTEIN_COMPLEX_DISASSEMBLY		199	0.526619	2.0357	0	0.0156122	0.287	5999	tags=49%, list=19%, signal=60%
GO_REGULATION_OF_CELL_JUNCTION_ASSEMBLY	GO_REGULATION_OF_CELL_JUNCTION_ASSEMBLY		67	0.57648	2.03419	0.00205339	0.0157999	0.293	3104	tags=37%, list=10%, signal=41%
GO_CELL_AGGREGATION	GO_CELL_AGGREGATION		17	0.686442	2.03327	0.00207469	0.0158253	0.298	2656	tags=41%, list=8%, signal=45%
GO_CARTILAGE_CONDENSATION	GO_CARTILAGE_CONDENSATION		17	0.686442	2.03327	0.00207469	0.0156788	0.298	2656	tags=41%, list=8%, signal=45%
GO_NEURAL_TUBE_DEVELOPMENT	GO_NEURAL_TUBE_DEVELOPMENT		145	0.489223	2.03321	0	0.0155458	0.298	5702	tags=43%, list=18%, signal=52%
GO_POSITIVE_REGULATION_OF_WNT_SIGNALING_PATHWAY	GO_POSITIVE_REGULATION_OF_WNT_SIGNALING_PATHWAY		148	0.504169	2.03267	0	0.0154569	0.298	5279	tags=40%, list=17%, signal=48%
GO_REGULATION_OF_CATENIN_IMPORT_INTO_NUCLEUS	GO_REGULATION_OF_CATENIN_IMPORT_INTO_NUCLEUS		27	0.623034	2.03246	0	0.0153409	0.299	1921	tags=41%, list=6%, signal=43%
GO_ACETYLGALACTOSAMINYLTRANSFERASE_ACTIVITY	GO_ACETYLGALACTOSAMINYLTRANSFERASE_ACTIVITY		31	0.6793	2.02994	0	0.0156277	0.305	6139	tags=61%, list=19%, signal=76%
GO_ENDODERMAL_CELL_DIFFERENTIATION	GO_ENDODERMAL_CELL_DIFFERENTIATION		40	0.664429	2.02993	0	0.0154894	0.305	1120	tags=40%, list=4%, signal=41%
GO_BONE_MORPHOGENESIS	GO_BONE_MORPHOGENESIS		77	0.562457	2.02939	0.00195312	0.015467	0.306	4464	tags=39%, list=14%, signal=45%
GO_REGULATION_OF_EPITHELIAL_TO_MESENCHYMAL_TRANSITION	GO_REGULATION_OF_EPITHELIAL_TO_MESENCHYMAL_TRANSITION		64	0.533204	2.02928	0	0.0153326	0.306	3642	tags=38%, list=11%, signal=42%
GO_REGULATION_OF_ACTIN_FILAMENT_BASED_PROCESS	GO_REGULATION_OF_ACTIN_FILAMENT_BASED_PROCESS		299	0.454587	2.0292	0	0.0152098	0.306	4584	tags=33%, list=14%, signal=38%
GO_NEGATIVE_REGULATION_OF_PROTEIN_COMPLEX_DISASSEMBLY	GO_NEGATIVE_REGULATION_OF_PROTEIN_COMPLEX_DISASSEMBLY		156	0.526164	2.02835	0	0.0153412	0.309	5845	tags=50%, list=18%, signal=61%
GO_NEGATIVE_REGULATION_OF_CYTOSKELETON_ORGANIZATION	GO_NEGATIVE_REGULATION_OF_CYTOSKELETON_ORGANIZATION		206	0.492635	2.0273	0	0.0153655	0.312	6015	tags=47%, list=19%, signal=58%
GO_VESICLE_COAT	GO_VESICLE_COAT		44	0.622883	2.02561	0	0.0155602	0.314	2647	tags=43%, list=8%, signal=47%
GO_ANGIOGENESIS	GO_ANGIOGENESIS		283	0.518584	2.02505	0	0.0155507	0.314	7174	tags=48%, list=23%, signal=61%
GO_MICROTUBULE_END	GO_MICROTUBULE_END		21	0.74085	2.02419	0	0.0155808	0.316	4455	tags=62%, list=14%, signal=72%
GO_PROTEOGLYCAN_METABOLIC_PROCESS	GO_PROTEOGLYCAN_METABOLIC_PROCESS		82	0.569514	2.0228	0.00198413	0.0156785	0.319	5700	tags=48%, list=18%, signal=58%
GO_EMBRYONIC_CRANIAL_SKELETON_MORPHOGENESIS	GO_EMBRYONIC_CRANIAL_SKELETON_MORPHOGENESIS		46	0.600918	2.02209	0	0.0157066	0.321	4422	tags=43%, list=14%, signal=50%
GO_ARTERY_DEVELOPMENT	GO_ARTERY_DEVELOPMENT		75	0.565509	2.01956	0	0.0159797	0.323	4861	tags=43%, list=15%, signal=50%
GO_REGULATION_OF_EMBRYONIC_DEVELOPMENT	GO_REGULATION_OF_EMBRYONIC_DEVELOPMENT		107	0.504726	2.01847	0	0.0161707	0.327	7059	tags=50%, list=22%, signal=63%
GO_ANCHORING_JUNCTION	GO_ANCHORING_JUNCTION		474	0.517743	2.01771	0	0.0162353	0.328	4627	tags=40%, list=15%, signal=46%
GO_RESPONSE_TO_TRANSFORMING_GROWTH_FACTOR_BETA	GO_RESPONSE_TO_TRANSFORMING_GROWTH_FACTOR_BETA		142	0.497644	2.01758	0	0.016126	0.328	4592	tags=32%, list=14%, signal=38%
GO_CELL_SUBSTRATE_JUNCTION	GO_CELL_SUBSTRATE_JUNCTION		388	0.544976	2.01696	0.00204499	0.01615	0.328	4627	tags=43%, list=15%, signal=50%
GO_INSULIN_LIKE_GROWTH_FACTOR_BINDING	GO_INSULIN_LIKE_GROWTH_FACTOR_BINDING		25	0.684495	2.01581	0.00209205	0.016255	0.33	5412	tags=60%, list=17%, signal=72%
GO_NEGATIVE_REGULATION_OF_CARTILAGE_DEVELOPMENT	GO_NEGATIVE_REGULATION_OF_CARTILAGE_DEVELOPMENT		23	0.730974	2.01311	0	0.0167493	0.335	5031	tags=65%, list=16%, signal=77%
GO_POSITIVE_REGULATION_OF_CELL_CYCLE_PHASE_TRANSITION	GO_POSITIVE_REGULATION_OF_CELL_CYCLE_PHASE_TRANSITION		66	0.576395	2.01276	0.00201613	0.0167165	0.338	7784	tags=67%, list=24%, signal=88%
GO_GLYCOPROTEIN_BINDING	GO_GLYCOPROTEIN_BINDING		99	0.507858	2.01189	0	0.016822	0.339	7063	tags=51%, list=22%, signal=65%
GO_TUBE_FORMATION	GO_TUBE_FORMATION		129	0.480339	2.01132	0	0.0167871	0.339	5702	tags=42%, list=18%, signal=51%
GO_ENDODERM_DEVELOPMENT	GO_ENDODERM_DEVELOPMENT		70	0.56976	2.00954	0	0.0170076	0.342	5323	tags=46%, list=17%, signal=55%
GO_REGULATION_OF_BMP_SIGNALING_PATHWAY	GO_REGULATION_OF_BMP_SIGNALING_PATHWAY		76	0.54936	2.00701	0	0.0174785	0.35	6830	tags=54%, list=21%, signal=69%
GO_SKELETAL_SYSTEM_MORPHOGENESIS	GO_SKELETAL_SYSTEM_MORPHOGENESIS		192	0.496149	2.00696	0	0.0173795	0.351	4610	tags=34%, list=15%, signal=40%
GO_REGULATION_OF_OSTEOBLAST_DIFFERENTIATION	GO_REGULATION_OF_OSTEOBLAST_DIFFERENTIATION		107	0.523374	2.00572	0	0.0174907	0.351	5353	tags=42%, list=17%, signal=50%
GO_ADHERENS_JUNCTION_ORGANIZATION	GO_ADHERENS_JUNCTION_ORGANIZATION		64	0.53463	2.00532	0.00205339	0.0174579	0.351	5554	tags=44%, list=17%, signal=53%
GO_CELL_MORPHOGENESIS_INVOLVED_IN_DIFFERENTIATION	GO_CELL_MORPHOGENESIS_INVOLVED_IN_DIFFERENTIATION		494	0.468604	2.00216	0	0.0180331	0.36	5116	tags=35%, list=16%, signal=41%
GO_MORPHOGENESIS_OF_A_POLARIZED_EPITHELIUM	GO_MORPHOGENESIS_OF_A_POLARIZED_EPITHELIUM		27	0.618946	2.00156	0	0.018057	0.361	4135	tags=52%, list=13%, signal=60%
GO_CEREBRAL_CORTEX_CELL_MIGRATION	GO_CEREBRAL_CORTEX_CELL_MIGRATION		41	0.60117	1.99985	0	0.0183916	0.365	4135	tags=41%, list=13%, signal=48%
GO_TRANSMEMBRANE_RECEPTOR_PROTEIN_SERINE_THREONINE_KINASE_SIGNALING_PATHWAY	GO_TRANSMEMBRANE_RECEPTOR_PROTEIN_SERINE_THREONINE_KINASE_SIGNALING_PATHWAY		183	0.471361	1.99907	0	0.018475	0.367	4371	tags=33%, list=14%, signal=38%
GO_PLATELET_DERIVED_GROWTH_FACTOR_RECEPTOR_SIGNALING_PATHWAY	GO_PLATELET_DERIVED_GROWTH_FACTOR_RECEPTOR_SIGNALING_PATHWAY		34	0.686789	1.9978	0	0.0186367	0.368	7174	tags=68%, list=23%, signal=87%
GO_HEART_MORPHOGENESIS	GO_HEART_MORPHOGENESIS		207	0.454773	1.99774	0	0.0185478	0.369	5341	tags=35%, list=17%, signal=42%
GO_PARAXIAL_MESODERM_DEVELOPMENT	GO_PARAXIAL_MESODERM_DEVELOPMENT		16	0.694738	1.99662	0	0.0187103	0.375	4231	tags=44%, list=13%, signal=50%
GO_MESENCHYME_DEVELOPMENT	GO_MESENCHYME_DEVELOPMENT		179	0.497995	1.99635	0	0.0186678	0.376	5319	tags=37%, list=17%, signal=45%
GO_RESPONSE_TO_GROWTH_FACTOR	GO_RESPONSE_TO_GROWTH_FACTOR		457	0.439474	1.99457	0	0.0190194	0.383	5345	tags=34%, list=17%, signal=41%
GO_WOUND_HEALING	GO_WOUND_HEALING		434	0.457491	1.99292	0	0.0193516	0.387	3670	tags=29%, list=12%, signal=32%
GO_DEVELOPMENTAL_CELL_GROWTH	GO_DEVELOPMENTAL_CELL_GROWTH		73	0.542142	1.99266	0	0.0192735	0.388	4927	tags=45%, list=16%, signal=53%
GO_NEGATIVE_REGULATION_OF_ORGANELLE_ORGANIZATION	GO_NEGATIVE_REGULATION_OF_ORGANELLE_ORGANIZATION		362	0.461993	1.99183	0	0.0194	0.389	6015	tags=41%, list=19%, signal=51%
GO_REGULATION_OF_CANONICAL_WNT_SIGNALING_PATHWAY	GO_REGULATION_OF_CANONICAL_WNT_SIGNALING_PATHWAY		227	0.465465	1.99136	0	0.0193476	0.389	4899	tags=37%, list=15%, signal=43%
GO_EXTRINSIC_COMPONENT_OF_MEMBRANE	GO_EXTRINSIC_COMPONENT_OF_MEMBRANE		238	0.460646	1.99119	0	0.0192578	0.389	5359	tags=35%, list=17%, signal=42%
GO_1_PHOSPHATIDYLINOSITOL_BINDING	GO_1_PHOSPHATIDYLINOSITOL_BINDING		19	0.743274	1.98955	0	0.0195729	0.397	5010	tags=63%, list=16%, signal=75%
GO_REGULATION_OF_CHROMOSOME_SEGREGATION	GO_REGULATION_OF_CHROMOSOME_SEGREGATION		77	0.622557	1.98915	0.01	0.0195104	0.397	4684	tags=53%, list=15%, signal=62%
GO_REGULATION_OF_MICROTUBULE_POLYMERIZATION_OR_DEPOLYMERIZATION	GO_REGULATION_OF_MICROTUBULE_POLYMERIZATION_OR_DEPOLYMERIZATION		165	0.535663	1.98765	0	0.0197346	0.401	5999	tags=50%, list=19%, signal=62%
GO_BODY_MORPHOGENESIS	GO_BODY_MORPHOGENESIS		43	0.590746	1.98507	0	0.0203219	0.407	5716	tags=60%, list=18%, signal=74%
GO_EMBRYONIC_CAMERA_TYPE_EYE_DEVELOPMENT	GO_EMBRYONIC_CAMERA_TYPE_EYE_DEVELOPMENT		35	0.586807	1.98183	0	0.021037	0.412	5289	tags=46%, list=17%, signal=55%
GO_CELL_MATRIX_ADHESION	GO_CELL_MATRIX_ADHESION		116	0.528257	1.98121	0.00205339	0.0210904	0.418	5490	tags=43%, list=17%, signal=52%
GO_RESPIRATORY_SYSTEM_DEVELOPMENT	GO_RESPIRATORY_SYSTEM_DEVELOPMENT		192	0.47169	1.98114	0	0.0209577	0.418	4422	tags=35%, list=14%, signal=40%
GO_MULTICELLULAR_ORGANISMAL_MACROMOLECULE_METABOLIC_PROCESS	GO_MULTICELLULAR_ORGANISMAL_MACROMOLECULE_METABOLIC_PROCESS		72	0.644994	1.98092	0.00601202	0.020913	0.419	4362	tags=47%, list=14%, signal=55%
GO_REGULATION_OF_PATHWAY_RESTRICTED_SMAD_PROTEIN_PHOSPHORYLATION	GO_REGULATION_OF_PATHWAY_RESTRICTED_SMAD_PROTEIN_PHOSPHORYLATION		55	0.547363	1.98056	0	0.0209296	0.42	5585	tags=49%, list=18%, signal=59%
GO_RESPONSE_TO_BMP	GO_RESPONSE_TO_BMP		89	0.522585	1.97835	0	0.0213384	0.427	5064	tags=39%, list=16%, signal=47%
GO_CELLULAR_RESPONSE_TO_BMP_STIMULUS	GO_CELLULAR_RESPONSE_TO_BMP_STIMULUS		89	0.522584	1.97835	0	0.0212075	0.427	5064	tags=39%, list=16%, signal=47%
GO_FACE_DEVELOPMENT	GO_FACE_DEVELOPMENT		48	0.592429	1.97656	0	0.0215246	0.429	7078	tags=65%, list=22%, signal=83%
GO_EPITHELIAL_CELL_MORPHOGENESIS	GO_EPITHELIAL_CELL_MORPHOGENESIS		42	0.559905	1.97602	0	0.0216175	0.432	3946	tags=36%, list=12%, signal=41%
GO_REGULATION_OF_WNT_SIGNALING_PATHWAY	GO_REGULATION_OF_WNT_SIGNALING_PATHWAY		297	0.450104	1.97592	0	0.0215221	0.432	5279	tags=37%, list=17%, signal=44%
GO_WNT_PROTEIN_BINDING	GO_WNT_PROTEIN_BINDING		29	0.63087	1.9752	0.00402414	0.0215471	0.434	3369	tags=45%, list=11%, signal=50%
GO_PROLINE_RICH_REGION_BINDING	GO_PROLINE_RICH_REGION_BINDING		18	0.659238	1.97503	0	0.0214664	0.434	2481	tags=39%, list=8%, signal=42%
GO_ODONTOGENESIS	GO_ODONTOGENESIS		102	0.497145	1.9744	0.00399202	0.0214894	0.435	5743	tags=42%, list=18%, signal=51%
GO_NUCLEOTIDE_SUGAR_BIOSYNTHETIC_PROCESS	GO_NUCLEOTIDE_SUGAR_BIOSYNTHETIC_PROCESS		19	0.730296	1.97431	0	0.0213798	0.435	4115	tags=47%, list=13%, signal=54%
GO_CELL_CYCLE_ARREST	GO_CELL_CYCLE_ARREST		141	0.450113	1.97368	0	0.021376	0.435	5073	tags=34%, list=16%, signal=40%
GO_RECEPTOR_METABOLIC_PROCESS	GO_RECEPTOR_METABOLIC_PROCESS		76	0.507325	1.97345	0	0.0213011	0.435	3645	tags=30%, list=11%, signal=34%
GO_HEAD_MORPHOGENESIS	GO_HEAD_MORPHOGENESIS		35	0.614564	1.9725	0	0.021468	0.436	7153	tags=71%, list=23%, signal=92%
GO_MESODERM_DEVELOPMENT	GO_MESODERM_DEVELOPMENT		110	0.475019	1.96562	0	0.023482	0.457	5420	tags=35%, list=17%, signal=43%
GO_REGULATION_OF_NUCLEOCYTOPLASMIC_TRANSPORT	GO_REGULATION_OF_NUCLEOCYTOPLASMIC_TRANSPORT		214	0.450865	1.96554	0	0.0233736	0.457	5906	tags=39%, list=19%, signal=47%
GO_RESPONSE_TO_LIPOPROTEIN_PARTICLE	GO_RESPONSE_TO_LIPOPROTEIN_PARTICLE		19	0.691985	1.96449	0.00399202	0.0235617	0.457	3670	tags=42%, list=12%, signal=48%
GO_POSITIVE_REGULATION_OF_MITOTIC_CELL_CYCLE	GO_POSITIVE_REGULATION_OF_MITOTIC_CELL_CYCLE		118	0.502833	1.9636	0.00201207	0.0237228	0.459	6185	tags=51%, list=19%, signal=63%
GO_RNA_POLYMERASE_II_TRANSCRIPTION_FACTOR_BINDING	GO_RNA_POLYMERASE_II_TRANSCRIPTION_FACTOR_BINDING		102	0.467199	1.96322	0	0.0237121	0.459	5341	tags=39%, list=17%, signal=47%
GO_NEGATIVE_REGULATION_OF_BINDING	GO_NEGATIVE_REGULATION_OF_BINDING		129	0.473767	1.96197	0	0.0239523	0.461	5778	tags=41%, list=18%, signal=50%
GO_COATED_VESICLE_MEMBRANE	GO_COATED_VESICLE_MEMBRANE		134	0.503994	1.96122	0	0.0240589	0.462	4897	tags=41%, list=15%, signal=48%
GO_MORPHOGENESIS_OF_EMBRYONIC_EPITHELIUM	GO_MORPHOGENESIS_OF_EMBRYONIC_EPITHELIUM		133	0.462092	1.96001	0	0.0241927	0.463	5847	tags=41%, list=18%, signal=50%
GO_SPINDLE	GO_SPINDLE		266	0.511132	1.95951	0.00408998	0.0242284	0.464	5797	tags=48%, list=18%, signal=58%
GO_NEGATIVE_REGULATION_OF_CANONICAL_WNT_SIGNALING_PATHWAY	GO_NEGATIVE_REGULATION_OF_CANONICAL_WNT_SIGNALING_PATHWAY		157	0.496505	1.95932	0	0.024168	0.465	5031	tags=39%, list=16%, signal=47%
GO_COLLAGEN_TRIMER	GO_COLLAGEN_TRIMER		83	0.624889	1.95873	0.00587084	0.0241828	0.465	3103	tags=42%, list=10%, signal=47%
GO_MULTICELLULAR_ORGANISM_METABOLIC_PROCESS	GO_MULTICELLULAR_ORGANISM_METABOLIC_PROCESS		86	0.602237	1.95771	0.00202429	0.0243646	0.467	4362	tags=42%, list=14%, signal=48%
GO_NEGATIVE_REGULATION_OF_CHONDROCYTE_DIFFERENTIATION	GO_NEGATIVE_REGULATION_OF_CHONDROCYTE_DIFFERENTIATION		17	0.756849	1.95712	0.00198413	0.0243508	0.468	3837	tags=65%, list=12%, signal=74%
GO_TRANSFORMING_GROWTH_FACTOR_BETA_RECEPTOR_SIGNALING_PATHWAY	GO_TRANSFORMING_GROWTH_FACTOR_BETA_RECEPTOR_SIGNALING_PATHWAY		94	0.487724	1.95498	0	0.024786	0.471	4360	tags=33%, list=14%, signal=38%
GO_CELL_LEADING_EDGE	GO_CELL_LEADING_EDGE		337	0.45702	1.95374	0	0.0249457	0.474	4835	tags=36%, list=15%, signal=42%
GO_GLYCOPROTEIN_METABOLIC_PROCESS	GO_GLYCOPROTEIN_METABOLIC_PROCESS		335	0.450254	1.95186	0	0.0253829	0.478	7220	tags=45%, list=23%, signal=58%
GO_REGULATION_OF_PROTEIN_IMPORT	GO_REGULATION_OF_PROTEIN_IMPORT		177	0.450192	1.95123	0	0.0254864	0.479	5537	tags=37%, list=17%, signal=45%
GO_IN_UTERO_EMBRYONIC_DEVELOPMENT	GO_IN_UTERO_EMBRYONIC_DEVELOPMENT		300	0.445463	1.95005	0	0.0256869	0.482	5353	tags=38%, list=17%, signal=45%
GO_FIBRONECTIN_BINDING	GO_FIBRONECTIN_BINDING		26	0.709551	1.94953	0.00399202	0.0257772	0.483	6247	tags=77%, list=20%, signal=96%
GO_RAC_GTPASE_BINDING	GO_RAC_GTPASE_BINDING		38	0.577639	1.94915	0	0.0257241	0.484	2861	tags=42%, list=9%, signal=46%
GO_LIPOPROTEIN_PARTICLE_RECEPTOR_BINDING	GO_LIPOPROTEIN_PARTICLE_RECEPTOR_BINDING		22	0.656091	1.94869	0.00195312	0.0257964	0.485	4788	tags=55%, list=15%, signal=64%
GO_ODONTOGENESIS_OF_DENTIN_CONTAINING_TOOTH	GO_ODONTOGENESIS_OF_DENTIN_CONTAINING_TOOTH		73	0.508893	1.94848	0.00409836	0.0257203	0.486	6494	tags=44%, list=20%, signal=55%
GO_POSITIVE_REGULATION_OF_PEPTIDYL_THREONINE_PHOSPHORYLATION	GO_POSITIVE_REGULATION_OF_PEPTIDYL_THREONINE_PHOSPHORYLATION		24	0.629063	1.94833	0	0.025647	0.486	6232	tags=50%, list=20%, signal=62%
GO_AXIS_ELONGATION	GO_AXIS_ELONGATION		27	0.59059	1.94677	0	0.0259852	0.489	6957	tags=48%, list=22%, signal=62%
GO_REGULATION_OF_OSSIFICATION	GO_REGULATION_OF_OSSIFICATION		167	0.499632	1.94467	0	0.0266147	0.497	5759	tags=40%, list=18%, signal=48%
GO_CELLULAR_RESPONSE_TO_ACID_CHEMICAL	GO_CELLULAR_RESPONSE_TO_ACID_CHEMICAL		164	0.451419	1.94425	0	0.0265798	0.498	3120	tags=26%, list=10%, signal=28%
GO_PROTEOGLYCAN_BIOSYNTHETIC_PROCESS	GO_PROTEOGLYCAN_BIOSYNTHETIC_PROCESS		57	0.586418	1.94204	0.00204499	0.0270163	0.501	4385	tags=44%, list=14%, signal=51%
GO_CENTROSOME_LOCALIZATION	GO_CENTROSOME_LOCALIZATION		17	0.701754	1.94087	0.00203666	0.0272407	0.505	4135	tags=59%, list=13%, signal=68%
GO_ENDODERM_FORMATION	GO_ENDODERM_FORMATION		50	0.616324	1.94059	0.00204082	0.0272004	0.506	5239	tags=52%, list=16%, signal=62%
GO_MEMBRANE_MICRODOMAIN	GO_MEMBRANE_MICRODOMAIN		285	0.468181	1.94048	0	0.0270859	0.506	5270	tags=35%, list=17%, signal=42%
GO_MICROTUBULE_CYTOSKELETON_ORGANIZATION	GO_MICROTUBULE_CYTOSKELETON_ORGANIZATION		316	0.470547	1.94011	0	0.0271008	0.507	6201	tags=46%, list=20%, signal=57%
GO_NEGATIVE_REGULATION_OF_ADHERENS_JUNCTION_ORGANIZATION	GO_NEGATIVE_REGULATION_OF_ADHERENS_JUNCTION_ORGANIZATION		15	0.76485	1.93946	0	0.0272125	0.51	6336	tags=80%, list=20%, signal=100%
GO_GLIAL_CELL_MIGRATION	GO_GLIAL_CELL_MIGRATION		35	0.587668	1.93911	0	0.0271782	0.513	4936	tags=40%, list=16%, signal=47%
GO_SPROUTING_ANGIOGENESIS	GO_SPROUTING_ANGIOGENESIS		43	0.622328	1.9388	0.00399202	0.0271769	0.515	4464	tags=42%, list=14%, signal=49%
GO_EMBRYONIC_ORGAN_MORPHOGENESIS	GO_EMBRYONIC_ORGAN_MORPHOGENESIS		273	0.427643	1.93816	0	0.0273066	0.517	4422	tags=31%, list=14%, signal=35%
GO_REGULATION_OF_MESENCHYMAL_CELL_PROLIFERATION	GO_REGULATION_OF_MESENCHYMAL_CELL_PROLIFERATION		34	0.55959	1.93757	0	0.0273665	0.519	8311	tags=62%, list=26%, signal=84%
GO_SPINDLE_LOCALIZATION	GO_SPINDLE_LOCALIZATION		36	0.626056	1.93683	0.00205761	0.0275388	0.526	4135	tags=53%, list=13%, signal=61%
GO_ESTABLISHMENT_OR_MAINTENANCE_OF_CELL_POLARITY	GO_ESTABLISHMENT_OR_MAINTENANCE_OF_CELL_POLARITY		134	0.476414	1.93681	0	0.027417	0.526	6130	tags=40%, list=19%, signal=49%
GO_POSITIVE_REGULATION_OF_EPITHELIAL_CELL_PROLIFERATION	GO_POSITIVE_REGULATION_OF_EPITHELIAL_CELL_PROLIFERATION		148	0.467554	1.93629	0	0.0274556	0.527	6485	tags=42%, list=20%, signal=52%
GO_ESTABLISHMENT_OR_MAINTENANCE_OF_APICAL_BASAL_CELL_POLARITY	GO_ESTABLISHMENT_OR_MAINTENANCE_OF_APICAL_BASAL_CELL_POLARITY		34	0.565124	1.93509	0	0.0276467	0.53	2470	tags=29%, list=8%, signal=32%
GO_ESTABLISHMENT_OR_MAINTENANCE_OF_BIPOLAR_CELL_POLARITY	GO_ESTABLISHMENT_OR_MAINTENANCE_OF_BIPOLAR_CELL_POLARITY		34	0.565124	1.93509	0	0.0275175	0.53	2470	tags=29%, list=8%, signal=32%
GO_MITOTIC_SPINDLE_ORGANIZATION	GO_MITOTIC_SPINDLE_ORGANIZATION		64	0.625419	1.93457	0.0102881	0.0275725	0.532	5797	tags=61%, list=18%, signal=74%
GO_EPITHELIAL_TO_MESENCHYMAL_TRANSITION	GO_EPITHELIAL_TO_MESENCHYMAL_TRANSITION		54	0.548009	1.93436	0	0.0274984	0.534	5031	tags=43%, list=16%, signal=51%
GO_FILAMENTOUS_ACTIN	GO_FILAMENTOUS_ACTIN		19	0.693654	1.93368	0.00407332	0.0275284	0.534	1720	tags=32%, list=5%, signal=33%
GO_NEGATIVE_REGULATION_OF_ANOIKIS	GO_NEGATIVE_REGULATION_OF_ANOIKIS		17	0.667119	1.93306	0	0.0276063	0.535	1633	tags=29%, list=5%, signal=31%
GO_REGULATION_OF_STEM_CELL_DIFFERENTIATION	GO_REGULATION_OF_STEM_CELL_DIFFERENTIATION		109	0.475407	1.9327	0	0.0275724	0.535	3642	tags=31%, list=11%, signal=35%
GO_COATED_VESICLE	GO_COATED_VESICLE		228	0.469476	1.93249	0	0.0274986	0.535	4914	tags=38%, list=15%, signal=44%
GO_MESONEPHRIC_TUBULE_MORPHOGENESIS	GO_MESONEPHRIC_TUBULE_MORPHOGENESIS		53	0.507934	1.9315	0	0.0277136	0.536	5254	tags=38%, list=17%, signal=45%
GO_EMBRYONIC_SKELETAL_SYSTEM_DEVELOPMENT	GO_EMBRYONIC_SKELETAL_SYSTEM_DEVELOPMENT		119	0.508775	1.93137	0	0.0276179	0.536	4422	tags=31%, list=14%, signal=36%
GO_REGULATION_OF_ENDOTHELIAL_CELL_PROLIFERATION	GO_REGULATION_OF_ENDOTHELIAL_CELL_PROLIFERATION		95	0.514032	1.93115	0	0.0275828	0.536	4780	tags=39%, list=15%, signal=46%
GO_CELLULAR_RESPONSE_TO_MECHANICAL_STIMULUS	GO_CELLULAR_RESPONSE_TO_MECHANICAL_STIMULUS		78	0.522237	1.92927	0	0.0280735	0.537	5161	tags=40%, list=16%, signal=47%
GO_REGULATION_OF_SMOOTH_MUSCLE_CELL_MIGRATION	GO_REGULATION_OF_SMOOTH_MUSCLE_CELL_MIGRATION		49	0.578394	1.92824	0.00609756	0.0282727	0.539	5024	tags=47%, list=16%, signal=56%
GO_CANONICAL_WNT_SIGNALING_PATHWAY	GO_CANONICAL_WNT_SIGNALING_PATHWAY		90	0.489075	1.92739	0	0.0284658	0.541	4861	tags=38%, list=15%, signal=44%
GO_UBIQUITIN_LIKE_PROTEIN_TRANSFERASE_ACTIVITY	GO_UBIQUITIN_LIKE_PROTEIN_TRANSFERASE_ACTIVITY		400	0.4367	1.92733	0	0.0283522	0.541	5906	tags=42%, list=19%, signal=50%
GO_ACTIN_BINDING	GO_ACTIN_BINDING		378	0.42789	1.92609	0	0.0285647	0.545	4502	tags=33%, list=14%, signal=38%
GO_MAMMARY_GLAND_DUCT_MORPHOGENESIS	GO_MAMMARY_GLAND_DUCT_MORPHOGENESIS		28	0.570495	1.92578	0	0.0285488	0.545	5905	tags=43%, list=19%, signal=53%
GO_EXTRACELLULAR_MATRIX_BINDING	GO_EXTRACELLULAR_MATRIX_BINDING		48	0.625172	1.92542	0.00424628	0.0285287	0.547	7046	tags=65%, list=22%, signal=83%
GO_POSITIVE_REGULATION_OF_EPITHELIAL_TO_MESENCHYMAL_TRANSITION	GO_POSITIVE_REGULATION_OF_EPITHELIAL_TO_MESENCHYMAL_TRANSITION		33	0.600413	1.9239	0	0.0288382	0.552	5000	tags=45%, list=16%, signal=54%
GO_PROTEIN_LOCALIZATION_TO_VACUOLE	GO_PROTEIN_LOCALIZATION_TO_VACUOLE		43	0.595165	1.92341	0.00212314	0.0288956	0.554	4133	tags=49%, list=13%, signal=56%
GO_SUBSTRATE_DEPENDENT_CELL_MIGRATION	GO_SUBSTRATE_DEPENDENT_CELL_MIGRATION		26	0.671102	1.92244	0.00414079	0.029154	0.557	6656	tags=65%, list=21%, signal=83%
GO_PROTEIN_UBIQUITINATION_INVOLVED_IN_UBIQUITIN_DEPENDENT_PROTEIN_CATABOLIC_PROCESS	GO_PROTEIN_UBIQUITINATION_INVOLVED_IN_UBIQUITIN_DEPENDENT_PROTEIN_CATABOLIC_PROCESS		129	0.516912	1.92208	0.00422833	0.0291317	0.558	6208	tags=51%, list=20%, signal=63%
GO_POSITIVE_REGULATION_OF_CELL_CYCLE_G1_S_PHASE_TRANSITION	GO_POSITIVE_REGULATION_OF_CELL_CYCLE_G1_S_PHASE_TRANSITION		28	0.607569	1.92134	0.00202429	0.0292413	0.559	7784	tags=68%, list=24%, signal=90%
GO_POSITIVE_REGULATION_OF_CELL_SUBSTRATE_ADHESION	GO_POSITIVE_REGULATION_OF_CELL_SUBSTRATE_ADHESION		95	0.502748	1.9207	0	0.0293525	0.561	7934	tags=54%, list=25%, signal=71%
GO_EPITHELIAL_CELL_PROLIFERATION	GO_EPITHELIAL_CELL_PROLIFERATION		86	0.485857	1.9204	0	0.0293231	0.561	4690	tags=34%, list=15%, signal=39%
GO_OSTEOBLAST_DIFFERENTIATION	GO_OSTEOBLAST_DIFFERENTIATION		123	0.501802	1.91968	0.00208333	0.0294325	0.563	5244	tags=42%, list=17%, signal=50%
GO_MITOTIC_CYTOKINESIS	GO_MITOTIC_CYTOKINESIS		31	0.691931	1.91948	0.00410678	0.0293895	0.563	5984	tags=74%, list=19%, signal=91%
GO_LENS_MORPHOGENESIS_IN_CAMERA_TYPE_EYE	GO_LENS_MORPHOGENESIS_IN_CAMERA_TYPE_EYE		16	0.673279	1.91836	0	0.0296293	0.564	2885	tags=44%, list=9%, signal=48%
GO_CARDIAC_CHAMBER_DEVELOPMENT	GO_CARDIAC_CHAMBER_DEVELOPMENT		141	0.471845	1.91786	0	0.029655	0.566	5331	tags=37%, list=17%, signal=44%
GO_THYMUS_DEVELOPMENT	GO_THYMUS_DEVELOPMENT		46	0.525347	1.9178	0.00204499	0.0295564	0.566	4900	tags=41%, list=15%, signal=49%
GO_EPITHELIAL_CELL_DEVELOPMENT	GO_EPITHELIAL_CELL_DEVELOPMENT		179	0.435202	1.91663	0	0.0297994	0.57	4271	tags=29%, list=13%, signal=33%
GO_EMBRYONIC_ORGAN_DEVELOPMENT	GO_EMBRYONIC_ORGAN_DEVELOPMENT		395	0.409065	1.91524	0	0.0301787	0.573	5420	tags=34%, list=17%, signal=40%
GO_MYOBLAST_DIFFERENTIATION	GO_MYOBLAST_DIFFERENTIATION		34	0.570095	1.91258	0.00205761	0.0310032	0.58	4626	tags=44%, list=15%, signal=52%
GO_RESPONSE_TO_PLATELET_DERIVED_GROWTH_FACTOR	GO_RESPONSE_TO_PLATELET_DERIVED_GROWTH_FACTOR		18	0.691552	1.91167	0	0.0311805	0.584	2291	tags=39%, list=7%, signal=42%
GO_OUTFLOW_TRACT_MORPHOGENESIS	GO_OUTFLOW_TRACT_MORPHOGENESIS		56	0.53543	1.91053	0	0.0314065	0.587	4422	tags=39%, list=14%, signal=46%
GO_NEGATIVE_REGULATION_OF_EPITHELIAL_CELL_MIGRATION	GO_NEGATIVE_REGULATION_OF_EPITHELIAL_CELL_MIGRATION		49	0.524467	1.91049	0.0020202	0.031318	0.587	3946	tags=37%, list=12%, signal=42%
GO_ANDROGEN_RECEPTOR_SIGNALING_PATHWAY	GO_ANDROGEN_RECEPTOR_SIGNALING_PATHWAY		40	0.601899	1.91009	0.0041841	0.0313394	0.587	4822	tags=52%, list=15%, signal=62%
GO_BRANCHING_INVOLVED_IN_URETERIC_BUD_MORPHOGENESIS	GO_BRANCHING_INVOLVED_IN_URETERIC_BUD_MORPHOGENESIS		44	0.520051	1.90858	0.00391389	0.0316754	0.59	5254	tags=39%, list=17%, signal=46%
GO_NEPHRON_DEVELOPMENT	GO_NEPHRON_DEVELOPMENT		115	0.471379	1.90794	0.00191571	0.0318389	0.593	5353	tags=35%, list=17%, signal=42%
GO_ACTIN_FILAMENT	GO_ACTIN_FILAMENT		67	0.526961	1.90785	0.00201613	0.0317583	0.593	5425	tags=36%, list=17%, signal=43%
GO_CELLULAR_RESPONSE_TO_RADIATION	GO_CELLULAR_RESPONSE_TO_RADIATION		129	0.467432	1.90637	0	0.0321684	0.598	6097	tags=46%, list=19%, signal=56%
GO_CYTOKINESIS	GO_CYTOKINESIS		81	0.566905	1.90577	0.00210526	0.0323545	0.603	5656	tags=56%, list=18%, signal=67%
GO_KERATAN_SULFATE_BIOSYNTHETIC_PROCESS	GO_KERATAN_SULFATE_BIOSYNTHETIC_PROCESS		27	0.613026	1.9036	0.00207039	0.0329289	0.61	6413	tags=56%, list=20%, signal=70%
GO_MICROTUBULE_PLUS_END	GO_MICROTUBULE_PLUS_END		16	0.754775	1.90223	0.00407332	0.0332413	0.614	4455	tags=63%, list=14%, signal=73%
GO_POSITIVE_REGULATION_OF_CHROMOSOME_SEGREGATION	GO_POSITIVE_REGULATION_OF_CHROMOSOME_SEGREGATION		23	0.672678	1.89941	0.0119284	0.0342104	0.618	5984	tags=70%, list=19%, signal=86%
GO_CELL_JUNCTION_ORGANIZATION	GO_CELL_JUNCTION_ORGANIZATION		175	0.498079	1.89936	0.00209205	0.0340938	0.619	4270	tags=35%, list=13%, signal=41%
GO_MAINTENANCE_OF_LOCATION	GO_MAINTENANCE_OF_LOCATION		134	0.445424	1.8991	0	0.0340613	0.619	5815	tags=40%, list=18%, signal=48%
GO_RECEPTOR_CATABOLIC_PROCESS	GO_RECEPTOR_CATABOLIC_PROCESS		16	0.648296	1.89872	0.00816326	0.0341035	0.62	5630	tags=56%, list=18%, signal=68%
GO_NEGATIVE_REGULATION_OF_NUCLEAR_DIVISION	GO_NEGATIVE_REGULATION_OF_NUCLEAR_DIVISION		42	0.59715	1.89817	0.0179641	0.0342511	0.624	5216	tags=45%, list=16%, signal=54%
GO_PHOSPHATIDYLINOSITOL_BINDING	GO_PHOSPHATIDYLINOSITOL_BINDING		192	0.447409	1.89706	0.00607287	0.0345481	0.625	4679	tags=34%, list=15%, signal=40%
GO_POSITIVE_REGULATION_OF_ENDOTHELIAL_CELL_PROLIFERATION	GO_POSITIVE_REGULATION_OF_ENDOTHELIAL_CELL_PROLIFERATION		66	0.51478	1.89631	0	0.0346971	0.628	4569	tags=39%, list=14%, signal=46%
GO_POSITIVE_REGULATION_OF_PROTEASOMAL_PROTEIN_CATABOLIC_PROCESS	GO_POSITIVE_REGULATION_OF_PROTEASOMAL_PROTEIN_CATABOLIC_PROCESS		96	0.485389	1.89566	0	0.0347984	0.631	4669	tags=38%, list=15%, signal=44%
GO_POSITIVE_REGULATION_OF_STEM_CELL_DIFFERENTIATION	GO_POSITIVE_REGULATION_OF_STEM_CELL_DIFFERENTIATION		49	0.542341	1.8955	0.00416667	0.0347202	0.632	3642	tags=31%, list=11%, signal=35%
GO_ER_TO_GOLGI_TRANSPORT_VESICLE	GO_ER_TO_GOLGI_TRANSPORT_VESICLE		68	0.562583	1.89476	0.0104167	0.0349318	0.634	5711	tags=49%, list=18%, signal=59%
GO_NEGATIVE_REGULATION_OF_ENDOTHELIAL_CELL_PROLIFERATION	GO_NEGATIVE_REGULATION_OF_ENDOTHELIAL_CELL_PROLIFERATION		30	0.582584	1.89455	0.00196464	0.0348868	0.634	3763	tags=40%, list=12%, signal=45%
GO_NEGATIVE_REGULATION_OF_PROTEIN_BINDING	GO_NEGATIVE_REGULATION_OF_PROTEIN_BINDING		78	0.488552	1.89409	0	0.0349163	0.634	6773	tags=50%, list=21%, signal=63%
GO_COCHLEA_DEVELOPMENT	GO_COCHLEA_DEVELOPMENT		39	0.534651	1.89264	0.00201613	0.0354585	0.639	5003	tags=41%, list=16%, signal=49%
GO_CELLULAR_RESPONSE_TO_EXTERNAL_STIMULUS	GO_CELLULAR_RESPONSE_TO_EXTERNAL_STIMULUS		254	0.422477	1.89234	0.00207469	0.0354315	0.639	5330	tags=36%, list=17%, signal=43%
GO_CELL_CORTEX	GO_CELL_CORTEX		225	0.421253	1.89227	0	0.0353266	0.639	4735	tags=32%, list=15%, signal=38%
GO_HISTONE_MONOUBIQUITINATION	GO_HISTONE_MONOUBIQUITINATION		23	0.665991	1.89221	0	0.0352017	0.639	5407	tags=74%, list=17%, signal=89%
GO_CYTOSKELETON_DEPENDENT_CYTOKINESIS	GO_CYTOSKELETON_DEPENDENT_CYTOKINESIS		39	0.64663	1.89193	0.00823045	0.0351959	0.64	5984	tags=69%, list=19%, signal=85%
GO_CHONDROITIN_SULFATE_PROTEOGLYCAN_METABOLIC_PROCESS	GO_CHONDROITIN_SULFATE_PROTEOGLYCAN_METABOLIC_PROCESS		42	0.5885	1.89156	0.00613497	0.0351867	0.641	4936	tags=50%, list=16%, signal=59%
GO_POST_GOLGI_VESICLE_MEDIATED_TRANSPORT	GO_POST_GOLGI_VESICLE_MEDIATED_TRANSPORT		81	0.52266	1.89097	0.0102669	0.035305	0.643	6366	tags=51%, list=20%, signal=63%
GO_NEGATIVE_REGULATION_OF_WNT_SIGNALING_PATHWAY	GO_NEGATIVE_REGULATION_OF_WNT_SIGNALING_PATHWAY		189	0.464018	1.88938	0.00206186	0.0358066	0.646	6837	tags=43%, list=22%, signal=55%
GO_REGULATION_OF_EPITHELIAL_CELL_MIGRATION	GO_REGULATION_OF_EPITHELIAL_CELL_MIGRATION		159	0.453118	1.88864	0	0.036029	0.648	4531	tags=33%, list=14%, signal=38%
GO_REGULATION_OF_CYTOPLASMIC_TRANSPORT	GO_REGULATION_OF_CYTOPLASMIC_TRANSPORT		459	0.40076	1.88841	0	0.0360074	0.648	5705	tags=34%, list=18%, signal=41%
GO_POSITIVE_REGULATION_OF_CARDIAC_MUSCLE_CELL_PROLIFERATION	GO_POSITIVE_REGULATION_OF_CARDIAC_MUSCLE_CELL_PROLIFERATION		18	0.613716	1.88807	0	0.0360392	0.649	8311	tags=67%, list=26%, signal=90%
GO_EPIBOLY	GO_EPIBOLY		20	0.642528	1.88798	0.00199203	0.0359606	0.649	3228	tags=35%, list=10%, signal=39%
GO_COATED_MEMBRANE	GO_COATED_MEMBRANE		82	0.501118	1.88753	0.00203252	0.0359738	0.651	4726	tags=44%, list=15%, signal=51%
GO_REGULATION_OF_EARLY_ENDOSOME_TO_LATE_ENDOSOME_TRANSPORT	GO_REGULATION_OF_EARLY_ENDOSOME_TO_LATE_ENDOSOME_TRANSPORT		16	0.751555	1.88714	0.0041841	0.0360146	0.651	2610	tags=56%, list=8%, signal=61%
GO_POSITIVE_REGULATION_OF_CANONICAL_WNT_SIGNALING_PATHWAY	GO_POSITIVE_REGULATION_OF_CANONICAL_WNT_SIGNALING_PATHWAY		115	0.490438	1.88628	0.00408163	0.0362873	0.652	4899	tags=38%, list=15%, signal=45%
GO_CELL_JUNCTION_ASSEMBLY	GO_CELL_JUNCTION_ASSEMBLY		125	0.528602	1.88609	0.00416667	0.0362298	0.652	3607	tags=37%, list=11%, signal=41%
GO_PHOSPHOLIPID_TRANSPORT	GO_PHOSPHOLIPID_TRANSPORT		54	0.52173	1.8859	0	0.0361916	0.652	4679	tags=41%, list=15%, signal=48%
GO_ENDOCHONDRAL_BONE_MORPHOGENESIS	GO_ENDOCHONDRAL_BONE_MORPHOGENESIS		44	0.56498	1.88588	0.00787402	0.0360799	0.652	4464	tags=43%, list=14%, signal=50%
GO_REGULATION_OF_PROTEASOMAL_PROTEIN_CATABOLIC_PROCESS	GO_REGULATION_OF_PROTEASOMAL_PROTEIN_CATABOLIC_PROCESS		175	0.478443	1.88564	0.00207039	0.0360835	0.652	4669	tags=37%, list=15%, signal=43%
GO_GOLGI_TO_VACUOLE_TRANSPORT	GO_GOLGI_TO_VACUOLE_TRANSPORT		25	0.633302	1.88563	0.0103306	0.0359582	0.652	3459	tags=48%, list=11%, signal=54%
GO_EYE_DEVELOPMENT	GO_EYE_DEVELOPMENT		308	0.411926	1.88562	0	0.0358338	0.652	5509	tags=36%, list=17%, signal=43%
GO_CYTOPLASMIC_REGION	GO_CYTOPLASMIC_REGION		270	0.416873	1.88506	0	0.0359803	0.655	4735	tags=33%, list=15%, signal=38%
GO_MAINTENANCE_OF_CELL_NUMBER	GO_MAINTENANCE_OF_CELL_NUMBER		126	0.446247	1.88427	0	0.0361762	0.659	5994	tags=40%, list=19%, signal=49%
GO_EARLY_ENDOSOME	GO_EARLY_ENDOSOME		286	0.430137	1.88228	0	0.036825	0.665	4788	tags=34%, list=15%, signal=40%
GO_PHOSPHOLIPID_TRANSPORTER_ACTIVITY	GO_PHOSPHOLIPID_TRANSPORTER_ACTIVITY		43	0.536755	1.88184	0	0.036851	0.668	4679	tags=47%, list=15%, signal=54%
GO_NEGATIVE_REGULATION_OF_ORGAN_GROWTH	GO_NEGATIVE_REGULATION_OF_ORGAN_GROWTH		21	0.608205	1.88108	0	0.0370526	0.672	2145	tags=33%, list=7%, signal=36%
GO_CYTOPLASMIC_DYNEIN_COMPLEX	GO_CYTOPLASMIC_DYNEIN_COMPLEX		15	0.710335	1.88065	0.00804829	0.0371008	0.673	4506	tags=60%, list=14%, signal=70%
GO_GDP_BINDING	GO_GDP_BINDING		48	0.608506	1.88048	0.00584795	0.0370277	0.673	6946	tags=67%, list=22%, signal=85%
GO_REGULATION_OF_PROTEIN_BINDING	GO_REGULATION_OF_PROTEIN_BINDING		167	0.427232	1.87979	0	0.0372072	0.674	5031	tags=34%, list=16%, signal=40%
GO_ACTIN_CYTOSKELETON	GO_ACTIN_CYTOSKELETON		424	0.418512	1.87966	0	0.0371392	0.674	5427	tags=34%, list=17%, signal=40%
GO_PHOSPHATIDYLINOSITOL_PHOSPHATE_BINDING	GO_PHOSPHATIDYLINOSITOL_PHOSPHATE_BINDING		111	0.448522	1.87923	0.00785855	0.0371839	0.674	5019	tags=32%, list=16%, signal=38%
GO_POSITIVE_REGULATION_OF_RECEPTOR_MEDIATED_ENDOCYTOSIS	GO_POSITIVE_REGULATION_OF_RECEPTOR_MEDIATED_ENDOCYTOSIS		47	0.533456	1.87889	0.00203252	0.0371654	0.674	4152	tags=38%, list=13%, signal=44%
GO_UBIQUITIN_LIGASE_COMPLEX	GO_UBIQUITIN_LIGASE_COMPLEX		252	0.433399	1.87877	0.00588235	0.0370847	0.674	4778	tags=38%, list=15%, signal=44%
GO_REGULATION_OF_BIOMINERAL_TISSUE_DEVELOPMENT	GO_REGULATION_OF_BIOMINERAL_TISSUE_DEVELOPMENT		69	0.518112	1.87857	0.00403226	0.0370607	0.676	5677	tags=41%, list=18%, signal=49%
GO_NLS_BEARING_PROTEIN_IMPORT_INTO_NUCLEUS	GO_NLS_BEARING_PROTEIN_IMPORT_INTO_NUCLEUS		22	0.656242	1.87836	0.00396825	0.0370196	0.676	2813	tags=45%, list=9%, signal=50%
GO_POSITIVE_REGULATION_OF_CELL_DIVISION	GO_POSITIVE_REGULATION_OF_CELL_DIVISION		113	0.483494	1.87788	0	0.0370927	0.678	7242	tags=50%, list=23%, signal=64%
GO_REGULATION_OF_ORGAN_MORPHOGENESIS	GO_REGULATION_OF_ORGAN_MORPHOGENESIS		239	0.4492	1.87773	0	0.0370312	0.679	7088	tags=43%, list=22%, signal=55%
GO_REGULATION_OF_VACUOLAR_TRANSPORT	GO_REGULATION_OF_VACUOLAR_TRANSPORT		29	0.62381	1.87678	0.004158	0.037349	0.679	4133	tags=48%, list=13%, signal=55%
GO_REGULATION_OF_PLASMA_MEMBRANE_ORGANIZATION	GO_REGULATION_OF_PLASMA_MEMBRANE_ORGANIZATION		71	0.514202	1.87628	0	0.037437	0.683	7381	tags=52%, list=23%, signal=68%
GO_EMBRYONIC_CAMERA_TYPE_EYE_MORPHOGENESIS	GO_EMBRYONIC_CAMERA_TYPE_EYE_MORPHOGENESIS		24	0.600013	1.87611	0.00205339	0.037382	0.684	5289	tags=50%, list=17%, signal=60%
GO_SENSORY_ORGAN_DEVELOPMENT	GO_SENSORY_ORGAN_DEVELOPMENT		467	0.397807	1.87578	0	0.0373869	0.684	5509	tags=33%, list=17%, signal=40%
GO_CELLULAR_RESPONSE_TO_ABIOTIC_STIMULUS	GO_CELLULAR_RESPONSE_TO_ABIOTIC_STIMULUS		247	0.421984	1.87482	0	0.0376832	0.687	5415	tags=37%, list=17%, signal=44%
GO_CARDIAC_SEPTUM_DEVELOPMENT	GO_CARDIAC_SEPTUM_DEVELOPMENT		84	0.505027	1.87446	0.0040404	0.0376674	0.689	7494	tags=49%, list=24%, signal=64%
GO_GOLGI_VESICLE_TRANSPORT	GO_GOLGI_VESICLE_TRANSPORT		309	0.488868	1.87317	0.0041841	0.0380318	0.694	5129	tags=41%, list=16%, signal=49%
GO_PLATELET_AGGREGATION	GO_PLATELET_AGGREGATION		38	0.575142	1.87245	0.00621118	0.0381687	0.694	3365	tags=37%, list=11%, signal=41%
GO_REGULATION_OF_SISTER_CHROMATID_SEGREGATION	GO_REGULATION_OF_SISTER_CHROMATID_SEGREGATION		61	0.572487	1.87108	0.0201207	0.0386038	0.695	4684	tags=49%, list=15%, signal=58%
GO_CARDIAC_MUSCLE_TISSUE_DEVELOPMENT	GO_CARDIAC_MUSCLE_TISSUE_DEVELOPMENT		134	0.451311	1.86997	0	0.038892	0.698	3141	tags=31%, list=10%, signal=34%
GO_MAINTENANCE_OF_LOCATION_IN_CELL	GO_MAINTENANCE_OF_LOCATION_IN_CELL		93	0.465611	1.86905	0.00416667	0.0391899	0.701	5815	tags=42%, list=18%, signal=51%
GO_AMEBOIDAL_TYPE_CELL_MIGRATION	GO_AMEBOIDAL_TYPE_CELL_MIGRATION		150	0.4608	1.86805	0	0.0394777	0.705	4214	tags=33%, list=13%, signal=37%
GO_ORGANOPHOSPHATE_ESTER_TRANSPORT	GO_ORGANOPHOSPHATE_ESTER_TRANSPORT		85	0.475201	1.86793	0.00408998	0.039406	0.706	5536	tags=41%, list=17%, signal=50%
GO_REGULATION_OF_PROTEASOMAL_UBIQUITIN_DEPENDENT_PROTEIN_CATABOLIC_PROCESS	GO_REGULATION_OF_PROTEASOMAL_UBIQUITIN_DEPENDENT_PROTEIN_CATABOLIC_PROCESS		142	0.492007	1.86759	0.0041841	0.0394166	0.706	4669	tags=39%, list=15%, signal=46%
GO_LYSOSOMAL_LUMEN	GO_LYSOSOMAL_LUMEN		85	0.569922	1.86732	0.00863931	0.0394176	0.706	6325	tags=53%, list=20%, signal=66%
GO_POSITIVE_REGULATION_OF_CHONDROCYTE_DIFFERENTIATION	GO_POSITIVE_REGULATION_OF_CHONDROCYTE_DIFFERENTIATION		19	0.622209	1.86723	0.00422833	0.0393223	0.707	1268	tags=26%, list=4%, signal=27%
GO_TISSUE_MIGRATION	GO_TISSUE_MIGRATION		81	0.496021	1.867	0	0.0392649	0.708	4214	tags=37%, list=13%, signal=43%
GO_GLAND_MORPHOGENESIS	GO_GLAND_MORPHOGENESIS		95	0.475931	1.86629	0.00203666	0.0394461	0.708	5905	tags=41%, list=19%, signal=50%
GO_ASTROCYTE_DIFFERENTIATION	GO_ASTROCYTE_DIFFERENTIATION		38	0.535168	1.86569	0	0.0396019	0.711	4271	tags=39%, list=13%, signal=46%
GO_NON_CANONICAL_WNT_SIGNALING_PATHWAY	GO_NON_CANONICAL_WNT_SIGNALING_PATHWAY		134	0.492155	1.86536	0.00200803	0.0396184	0.711	4661	tags=35%, list=15%, signal=41%
GO_POSITIVE_REGULATION_OF_VASCULAR_ENDOTHELIAL_GROWTH_FACTOR_PRODUCTION	GO_POSITIVE_REGULATION_OF_VASCULAR_ENDOTHELIAL_GROWTH_FACTOR_PRODUCTION		26	0.619254	1.86371	0.00821355	0.0402381	0.717	5906	tags=58%, list=19%, signal=71%
GO_POSITIVE_REGULATION_OF_G1_S_TRANSITION_OF_MITOTIC_CELL_CYCLE	GO_POSITIVE_REGULATION_OF_G1_S_TRANSITION_OF_MITOTIC_CELL_CYCLE		24	0.600784	1.86351	0.002	0.0401897	0.718	7348	tags=63%, list=23%, signal=81%
GO_EMBRYONIC_DIGESTIVE_TRACT_DEVELOPMENT	GO_EMBRYONIC_DIGESTIVE_TRACT_DEVELOPMENT		32	0.581634	1.86321	0.00408163	0.0401672	0.719	7332	tags=63%, list=23%, signal=81%
GO_HOMOTYPIC_CELL_CELL_ADHESION	GO_HOMOTYPIC_CELL_CELL_ADHESION		49	0.54024	1.86193	0.00621118	0.0406784	0.724	7448	tags=55%, list=23%, signal=72%
GO_VACUOLAR_LUMEN	GO_VACUOLAR_LUMEN		109	0.527149	1.86063	0.0043573	0.0410621	0.727	6339	tags=50%, list=20%, signal=63%
GO_PIGMENT_GRANULE	GO_PIGMENT_GRANULE		101	0.528909	1.85964	0.00608519	0.0413112	0.727	6642	tags=52%, list=21%, signal=66%
GO_ENDOCHONDRAL_OSSIFICATION	GO_ENDOCHONDRAL_OSSIFICATION		25	0.63387	1.85875	0.00192678	0.0415778	0.731	4464	tags=48%, list=14%, signal=56%
GO_REPLACEMENT_OSSIFICATION	GO_REPLACEMENT_OSSIFICATION		25	0.63387	1.85875	0.00192678	0.0414529	0.731	4464	tags=48%, list=14%, signal=56%
GO_ESTABLISHMENT_OF_PROTEIN_LOCALIZATION_TO_VACUOLE	GO_ESTABLISHMENT_OF_PROTEIN_LOCALIZATION_TO_VACUOLE		31	0.600888	1.8587	0.00643777	0.0413612	0.732	4726	tags=55%, list=15%, signal=64%
GO_CELLULAR_RESPONSE_TO_IONIZING_RADIATION	GO_CELLULAR_RESPONSE_TO_IONIZING_RADIATION		50	0.553091	1.85774	0.00208768	0.0416681	0.733	6075	tags=52%, list=19%, signal=64%
GO_LUNG_ALVEOLUS_DEVELOPMENT	GO_LUNG_ALVEOLUS_DEVELOPMENT		40	0.570028	1.85765	0.00201207	0.0415782	0.733	4786	tags=48%, list=15%, signal=56%
GO_ADHERENS_JUNCTION_ASSEMBLY	GO_ADHERENS_JUNCTION_ASSEMBLY		33	0.578624	1.85756	0.00211416	0.0414737	0.733	4531	tags=45%, list=14%, signal=53%
GO_POSITIVE_REGULATION_OF_MESENCHYMAL_CELL_PROLIFERATION	GO_POSITIVE_REGULATION_OF_MESENCHYMAL_CELL_PROLIFERATION		27	0.552783	1.85649	0	0.0417477	0.735	4422	tags=41%, list=14%, signal=47%
GO_SMAD_PROTEIN_SIGNAL_TRANSDUCTION	GO_SMAD_PROTEIN_SIGNAL_TRANSDUCTION		52	0.507849	1.85542	0.00406504	0.0420778	0.737	5323	tags=42%, list=17%, signal=51%
GO_ARTERY_MORPHOGENESIS	GO_ARTERY_MORPHOGENESIS		51	0.536099	1.85482	0.00397614	0.0422252	0.739	4861	tags=43%, list=15%, signal=51%
GO_NEGATIVE_REGULATION_OF_STRESS_ACTIVATED_PROTEIN_KINASE_SIGNALING_CASCADE	GO_NEGATIVE_REGULATION_OF_STRESS_ACTIVATED_PROTEIN_KINASE_SIGNALING_CASCADE		41	0.528081	1.85372	0	0.0425513	0.742	5950	tags=44%, list=19%, signal=54%
GO_NEGATIVE_REGULATION_OF_STRESS_ACTIVATED_MAPK_CASCADE	GO_NEGATIVE_REGULATION_OF_STRESS_ACTIVATED_MAPK_CASCADE		41	0.528081	1.85372	0	0.0424269	0.742	5950	tags=44%, list=19%, signal=54%
GO_REGULATION_OF_ESTABLISHMENT_OF_PROTEIN_LOCALIZATION_TO_PLASMA_MEMBRANE	GO_REGULATION_OF_ESTABLISHMENT_OF_PROTEIN_LOCALIZATION_TO_PLASMA_MEMBRANE		46	0.529025	1.85357	0	0.0423709	0.742	4179	tags=37%, list=13%, signal=42%
GO_CELL_CORTEX_PART	GO_CELL_CORTEX_PART		111	0.449665	1.85327	0.00407332	0.0423537	0.744	4653	tags=35%, list=15%, signal=41%
GO_ESTABLISHMENT_OR_MAINTENANCE_OF_EPITHELIAL_CELL_APICAL_BASAL_POLARITY	GO_ESTABLISHMENT_OR_MAINTENANCE_OF_EPITHELIAL_CELL_APICAL_BASAL_POLARITY		27	0.550427	1.85149	0	0.0429636	0.748	5912	tags=44%, list=19%, signal=55%
GO_MUSCLE_STRUCTURE_DEVELOPMENT	GO_MUSCLE_STRUCTURE_DEVELOPMENT		405	0.424433	1.85143	0	0.0428441	0.748	5537	tags=36%, list=17%, signal=43%
GO_PROTEIN_MONOUBIQUITINATION	GO_PROTEIN_MONOUBIQUITINATION		50	0.569848	1.85123	0	0.0428099	0.749	6368	tags=62%, list=20%, signal=77%
GO_POSITIVE_REGULATION_OF_LOCOMOTION	GO_POSITIVE_REGULATION_OF_LOCOMOTION		398	0.436671	1.851	0	0.0427854	0.749	5412	tags=33%, list=17%, signal=39%
GO_RECEPTOR_INTERNALIZATION	GO_RECEPTOR_INTERNALIZATION		45	0.560852	1.85078	0.00408163	0.0427404	0.749	3488	tags=31%, list=11%, signal=35%
GO_CELL_SUBSTRATE_JUNCTION_ASSEMBLY	GO_CELL_SUBSTRATE_JUNCTION_ASSEMBLY		40	0.623669	1.85046	0.00823045	0.0427854	0.751	4531	tags=48%, list=14%, signal=55%
GO_SOMATIC_STEM_CELL_DIVISION	GO_SOMATIC_STEM_CELL_DIVISION		22	0.607808	1.8503	0.00806452	0.0427079	0.751	4064	tags=41%, list=13%, signal=47%
GO_INTRINSIC_COMPONENT_OF_GOLGI_MEMBRANE	GO_INTRINSIC_COMPONENT_OF_GOLGI_MEMBRANE		52	0.50712	1.84905	0.00413223	0.043114	0.755	8317	tags=56%, list=26%, signal=75%
GO_POSITIVE_REGULATION_OF_RESPONSE_TO_EXTRACELLULAR_STIMULUS	GO_POSITIVE_REGULATION_OF_RESPONSE_TO_EXTRACELLULAR_STIMULUS		48	0.543883	1.8472	0.00796813	0.0438809	0.758	7483	tags=58%, list=24%, signal=76%
GO_POSITIVE_REGULATION_OF_RESPONSE_TO_NUTRIENT_LEVELS	GO_POSITIVE_REGULATION_OF_RESPONSE_TO_NUTRIENT_LEVELS		48	0.543883	1.8472	0.00796813	0.0437569	0.758	7483	tags=58%, list=24%, signal=76%
GO_PROTEIN_LOCALIZATION_TO_LYSOSOME	GO_PROTEIN_LOCALIZATION_TO_LYSOSOME		18	0.655359	1.84705	0.00623701	0.0437082	0.758	4133	tags=67%, list=13%, signal=77%
GO_CLATHRIN_COATED_ENDOCYTIC_VESICLE_MEMBRANE	GO_CLATHRIN_COATED_ENDOCYTIC_VESICLE_MEMBRANE		46	0.56077	1.8469	0.0103093	0.0436437	0.758	5711	tags=48%, list=18%, signal=58%
GO_HEPARAN_SULFATE_PROTEOGLYCAN_METABOLIC_PROCESS	GO_HEPARAN_SULFATE_PROTEOGLYCAN_METABOLIC_PROCESS		28	0.60387	1.84685	0.00779727	0.0435444	0.758	5971	tags=50%, list=19%, signal=62%
GO_REGULATION_OF_MRNA_3_END_PROCESSING	GO_REGULATION_OF_MRNA_3_END_PROCESSING		26	0.604433	1.84678	0.0121212	0.0434438	0.758	3577	tags=46%, list=11%, signal=52%
GO_REGULATION_OF_ACTIN_FILAMENT_LENGTH	GO_REGULATION_OF_ACTIN_FILAMENT_LENGTH		148	0.429875	1.84594	0	0.0437253	0.758	4380	tags=31%, list=14%, signal=36%
GO_POSITIVE_REGULATION_OF_PROTEIN_BINDING	GO_POSITIVE_REGULATION_OF_PROTEIN_BINDING		73	0.462622	1.84567	0.0020284	0.0437662	0.759	4617	tags=32%, list=15%, signal=37%
GO_TRANSMEMBRANE_RECEPTOR_PROTEIN_KINASE_ACTIVITY	GO_TRANSMEMBRANE_RECEPTOR_PROTEIN_KINASE_ACTIVITY		81	0.523059	1.84278	0.0040404	0.0449437	0.763	2791	tags=31%, list=9%, signal=34%
GO_BLASTODERM_SEGMENTATION	GO_BLASTODERM_SEGMENTATION		15	0.66274	1.84267	0.00621118	0.0448573	0.763	5289	tags=53%, list=17%, signal=64%
GO_REGULATION_OF_CELL_CYCLE_G1_S_PHASE_TRANSITION	GO_REGULATION_OF_CELL_CYCLE_G1_S_PHASE_TRANSITION		140	0.469817	1.84264	0.00211864	0.0447429	0.763	6220	tags=46%, list=20%, signal=57%
GO_NEURON_PROJECTION_GUIDANCE	GO_NEURON_PROJECTION_GUIDANCE		192	0.450288	1.84209	0.00200803	0.044896	0.765	7598	tags=46%, list=24%, signal=61%
GO_COMPLEX_OF_COLLAGEN_TRIMERS	GO_COMPLEX_OF_COLLAGEN_TRIMERS		23	0.776713	1.84208	0.004	0.044773	0.765	1857	tags=65%, list=6%, signal=69%
GO_MIDBODY	GO_MIDBODY		121	0.514084	1.84165	0.0083682	0.0448151	0.767	5664	tags=49%, list=18%, signal=59%
GO_ACTININ_BINDING	GO_ACTININ_BINDING		28	0.566634	1.84103	0.00814664	0.0449433	0.769	823	tags=21%, list=3%, signal=22%
GO_REGULATION_OF_BINDING	GO_REGULATION_OF_BINDING		280	0.401949	1.84058	0	0.0450131	0.77	5778	tags=35%, list=18%, signal=42%
GO_EMBRYONIC_AXIS_SPECIFICATION	GO_EMBRYONIC_AXIS_SPECIFICATION		33	0.522585	1.84029	0.00412371	0.0450025	0.77	5323	tags=45%, list=17%, signal=55%
GO_KIDNEY_EPITHELIUM_DEVELOPMENT	GO_KIDNEY_EPITHELIUM_DEVELOPMENT		125	0.441766	1.83928	0	0.0453049	0.771	5353	tags=32%, list=17%, signal=38%
GO_POSITIVE_REGULATION_OF_NUCLEOCYTOPLASMIC_TRANSPORT	GO_POSITIVE_REGULATION_OF_NUCLEOCYTOPLASMIC_TRANSPORT		118	0.450212	1.83887	0.00607287	0.04536	0.772	6957	tags=43%, list=22%, signal=55%
GO_MUSCLE_TISSUE_DEVELOPMENT	GO_MUSCLE_TISSUE_DEVELOPMENT		256	0.426119	1.83863	0	0.0453376	0.772	4786	tags=33%, list=15%, signal=39%
GO_APOPTOTIC_CELL_CLEARANCE	GO_APOPTOTIC_CELL_CLEARANCE		27	0.595867	1.83725	0.00621118	0.0458854	0.776	3567	tags=37%, list=11%, signal=42%
GO_REGULATION_OF_SMOOTHENED_SIGNALING_PATHWAY	GO_REGULATION_OF_SMOOTHENED_SIGNALING_PATHWAY		61	0.501426	1.83642	0.0122951	0.0461187	0.778	5331	tags=44%, list=17%, signal=53%
GO_MESENCHYMAL_CELL_DIFFERENTIATION	GO_MESENCHYMAL_CELL_DIFFERENTIATION		130	0.462929	1.8364	0	0.0460031	0.778	5031	tags=35%, list=16%, signal=42%
GO_PROTEIN_AUTOUBIQUITINATION	GO_PROTEIN_AUTOUBIQUITINATION		48	0.521546	1.83633	0	0.0458934	0.778	6632	tags=54%, list=21%, signal=68%
GO_REGULATION_OF_ESTABLISHMENT_OF_PLANAR_POLARITY	GO_REGULATION_OF_ESTABLISHMENT_OF_PLANAR_POLARITY		109	0.522297	1.83495	0	0.0463901	0.78	4899	tags=39%, list=15%, signal=46%
GO_INTEGRIN_MEDIATED_SIGNALING_PATHWAY	GO_INTEGRIN_MEDIATED_SIGNALING_PATHWAY		81	0.544212	1.83466	0.010142	0.0463956	0.781	4983	tags=42%, list=16%, signal=50%
GO_LIPID_TRANSLOCATION	GO_LIPID_TRANSLOCATION		21	0.648808	1.83344	0.00787402	0.0468175	0.783	7954	tags=71%, list=25%, signal=95%
GO_CORTICAL_CYTOSKELETON	GO_CORTICAL_CYTOSKELETON		79	0.464419	1.83333	0.00606061	0.0467529	0.784	4501	tags=34%, list=14%, signal=40%
GO_TRANSCRIPTIONAL_ACTIVATOR_ACTIVITY_RNA_POLYMERASE_II_DISTAL_ENHANCER_SEQUENCE_SPECIFIC_BINDING	GO_TRANSCRIPTIONAL_ACTIVATOR_ACTIVITY_RNA_POLYMERASE_II_DISTAL_ENHANCER_SEQUENCE_SPECIFIC_BINDING		23	0.5783	1.83257	0.00399202	0.0469766	0.786	2922	tags=35%, list=9%, signal=38%
GO_TRANSMEMBRANE_RECEPTOR_PROTEIN_TYROSINE_KINASE_SIGNALING_PATHWAY	GO_TRANSMEMBRANE_RECEPTOR_PROTEIN_TYROSINE_KINASE_SIGNALING_PATHWAY		483	0.400633	1.83244	0.00205339	0.0468995	0.786	5412	tags=34%, list=17%, signal=40%
GO_ACTIN_FILAMENT_BASED_PROCESS	GO_ACTIN_FILAMENT_BASED_PROCESS		430	0.404442	1.8319	0	0.0470198	0.787	4759	tags=32%, list=15%, signal=37%
GO_REGULATION_OF_PROTEIN_POLYMERIZATION	GO_REGULATION_OF_PROTEIN_POLYMERIZATION		165	0.410264	1.8316	0	0.0470128	0.788	4380	tags=30%, list=14%, signal=34%
GO_BASAL_LAMINA	GO_BASAL_LAMINA		21	0.670674	1.83054	0.00617284	0.0473616	0.79	1802	tags=48%, list=6%, signal=50%
GO_REGULATION_OF_CALCINEURIN_NFAT_SIGNALING_CASCADE	GO_REGULATION_OF_CALCINEURIN_NFAT_SIGNALING_CASCADE		16	0.633464	1.83038	0.00197628	0.0472917	0.791	4385	tags=44%, list=14%, signal=51%
GO_CEREBRAL_CORTEX_RADIALLY_ORIENTED_CELL_MIGRATION	GO_CEREBRAL_CORTEX_RADIALLY_ORIENTED_CELL_MIGRATION		27	0.588513	1.82912	0.00795229	0.0477971	0.792	4135	tags=37%, list=13%, signal=43%
GO_POSITIVE_REGULATION_OF_PATHWAY_RESTRICTED_SMAD_PROTEIN_PHOSPHORYLATION	GO_POSITIVE_REGULATION_OF_PATHWAY_RESTRICTED_SMAD_PROTEIN_PHOSPHORYLATION		44	0.531139	1.82899	0.00394477	0.0477185	0.792	5323	tags=48%, list=17%, signal=57%
GO_GLAND_DEVELOPMENT	GO_GLAND_DEVELOPMENT		379	0.385998	1.82761	0	0.0482648	0.795	7158	tags=38%, list=23%, signal=48%
GO_PROTEIN_COMPLEX_INVOLVED_IN_CELL_ADHESION	GO_PROTEIN_COMPLEX_INVOLVED_IN_CELL_ADHESION		30	0.639626	1.8271	0.00801603	0.0484209	0.798	5591	tags=57%, list=18%, signal=69%
GO_POSITIVE_REGULATION_OF_GROWTH	GO_POSITIVE_REGULATION_OF_GROWTH		226	0.39889	1.82705	0	0.0483098	0.798	3712	tags=26%, list=12%, signal=29%
GO_EYE_MORPHOGENESIS	GO_EYE_MORPHOGENESIS		130	0.433645	1.82647	0.00209205	0.048448	0.799	3899	tags=33%, list=12%, signal=38%
GO_PHOSPHATIDYLINOSITOL_3_4_5_TRISPHOSPHATE_BINDING	GO_PHOSPHATIDYLINOSITOL_3_4_5_TRISPHOSPHATE_BINDING		33	0.56029	1.82598	0.00408163	0.04855	0.799	4523	tags=45%, list=14%, signal=53%
GO_EPIDERMIS_MORPHOGENESIS	GO_EPIDERMIS_MORPHOGENESIS		27	0.572104	1.82597	0.00798403	0.0484432	0.799	5743	tags=44%, list=18%, signal=54%
GO_REGULATION_OF_RECEPTOR_MEDIATED_ENDOCYTOSIS	GO_REGULATION_OF_RECEPTOR_MEDIATED_ENDOCYTOSIS		78	0.467533	1.82577	0	0.0484335	0.8	4219	tags=33%, list=13%, signal=38%
GO_NEGATIVE_REGULATION_OF_CELL_DEVELOPMENT	GO_NEGATIVE_REGULATION_OF_CELL_DEVELOPMENT		285	0.401463	1.82566	0	0.0483487	0.8	4528	tags=29%, list=14%, signal=33%
GO_MITOTIC_SPINDLE	GO_MITOTIC_SPINDLE		50	0.56268	1.82564	0.0184049	0.0482269	0.8	3239	tags=40%, list=10%, signal=44%
GO_VASCULAR_ENDOTHELIAL_GROWTH_FACTOR_RECEPTOR_SIGNALING_PATHWAY	GO_VASCULAR_ENDOTHELIAL_GROWTH_FACTOR_RECEPTOR_SIGNALING_PATHWAY		72	0.522499	1.8253	0.0102041	0.0482862	0.801	2837	tags=33%, list=9%, signal=37%
GO_PHOSPHATIDYLINOSITOL_3_KINASE_COMPLEX	GO_PHOSPHATIDYLINOSITOL_3_KINASE_COMPLEX		19	0.645456	1.82487	0.01	0.048338	0.802	4047	tags=47%, list=13%, signal=54%
GO_TRANSFERASE_ACTIVITY_TRANSFERRING_GLYCOSYL_GROUPS	GO_TRANSFERASE_ACTIVITY_TRANSFERRING_GLYCOSYL_GROUPS		257	0.414327	1.82462	0	0.0483285	0.802	7607	tags=45%, list=24%, signal=58%
GO_CELLULAR_RESPONSE_TO_ALCOHOL	GO_CELLULAR_RESPONSE_TO_ALCOHOL		109	0.442603	1.82407	0	0.0484861	0.805	5364	tags=38%, list=17%, signal=45%
GO_HISTONE_UBIQUITINATION	GO_HISTONE_UBIQUITINATION		34	0.583102	1.82385	0.00803213	0.0484786	0.806	5407	tags=59%, list=17%, signal=71%
GO_RESPONSE_TO_X_RAY	GO_RESPONSE_TO_X_RAY		30	0.610909	1.82384	0.00407332	0.0483682	0.806	6652	tags=63%, list=21%, signal=80%
GO_REGULATION_OF_CELL_MORPHOGENESIS_INVOLVED_IN_DIFFERENTIATION	GO_REGULATION_OF_CELL_MORPHOGENESIS_INVOLVED_IN_DIFFERENTIATION		324	0.414308	1.82373	0	0.0483022	0.806	5040	tags=32%, list=16%, signal=37%
GO_FILOPODIUM	GO_FILOPODIUM		90	0.466064	1.8234	0.00203666	0.0483669	0.808	4470	tags=31%, list=14%, signal=36%
GO_MIDBRAIN_DEVELOPMENT	GO_MIDBRAIN_DEVELOPMENT		85	0.459807	1.82315	0.00204918	0.0483647	0.808	3623	tags=32%, list=11%, signal=36%
GO_EMBRYONIC_PLACENTA_DEVELOPMENT	GO_EMBRYONIC_PLACENTA_DEVELOPMENT		82	0.480983	1.82257	0.00196078	0.0484923	0.809	8386	tags=54%, list=26%, signal=73%
GO_UBIQUITIN_LIKE_PROTEIN_LIGASE_ACTIVITY	GO_UBIQUITIN_LIKE_PROTEIN_LIGASE_ACTIVITY		190	0.444258	1.82219	0.0021097	0.048543	0.809	5220	tags=41%, list=16%, signal=49%
GO_NEURON_PROJECTION_REGENERATION	GO_NEURON_PROJECTION_REGENERATION		32	0.547135	1.82152	0.00206612	0.0487839	0.809	8102	tags=56%, list=25%, signal=75%
GO_EAR_DEVELOPMENT	GO_EAR_DEVELOPMENT		189	0.401393	1.8209	0	0.0488946	0.81	5031	tags=30%, list=16%, signal=36%
GO_TRANSMEMBRANE_RECEPTOR_PROTEIN_SERINE_THREONINE_KINASE_ACTIVITY	GO_TRANSMEMBRANE_RECEPTOR_PROTEIN_SERINE_THREONINE_KINASE_ACTIVITY		17	0.693615	1.81999	0.00775194	0.0491462	0.813	1607	tags=41%, list=5%, signal=43%
GO_NEGATIVE_REGULATION_OF_CELL_CYCLE	GO_NEGATIVE_REGULATION_OF_CELL_CYCLE		403	0.402181	1.81982	0	0.0491082	0.813	5997	tags=37%, list=19%, signal=45%
GO_CELL_DIVISION	GO_CELL_DIVISION		426	0.477853	1.81981	0.022869	0.0489893	0.813	6049	tags=49%, list=19%, signal=59%
GO_NUCLEAR_LOCALIZATION_SEQUENCE_BINDING	GO_NUCLEAR_LOCALIZATION_SEQUENCE_BINDING		20	0.654351	1.81926	0.00206186	0.049115	0.813	2813	tags=50%, list=9%, signal=55%
GO_ASTROCYTE_DEVELOPMENT	GO_ASTROCYTE_DEVELOPMENT		19	0.610921	1.81849	0	0.0493521	0.815	4271	tags=53%, list=13%, signal=61%
GO_METALLOENDOPEPTIDASE_ACTIVITY	GO_METALLOENDOPEPTIDASE_ACTIVITY		104	0.456445	1.81749	0.00406504	0.0497235	0.819	6045	tags=39%, list=19%, signal=49%
GO_LAMININ_BINDING	GO_LAMININ_BINDING		29	0.614025	1.81749	0.00856531	0.0496043	0.819	7046	tags=62%, list=22%, signal=80%
GO_POSITIVE_REGULATION_OF_ENDOCYTOSIS	GO_POSITIVE_REGULATION_OF_ENDOCYTOSIS		113	0.445134	1.8173	0.00410678	0.0495993	0.82	4531	tags=32%, list=14%, signal=37%
GO_INTERCALATED_DISC	GO_INTERCALATED_DISC		51	0.521891	1.8172	0.00417537	0.0495215	0.82	5677	tags=47%, list=18%, signal=57%
GO_POSITIVE_REGULATION_OF_GLUCOSE_TRANSPORT	GO_POSITIVE_REGULATION_OF_GLUCOSE_TRANSPORT		39	0.52874	1.81713	0.00578035	0.0494269	0.82	5744	tags=51%, list=18%, signal=63%
GO_LATERAL_PLASMA_MEMBRANE	GO_LATERAL_PLASMA_MEMBRANE		48	0.51908	1.81644	0.00631579	0.0496406	0.823	4045	tags=31%, list=13%, signal=36%
GO_PHOSPHATASE_COMPLEX	GO_PHOSPHATASE_COMPLEX		44	0.563524	1.81644	0.00992064	0.049523	0.823	4647	tags=50%, list=15%, signal=58%
GO_VACUOLAR_TRANSPORT	GO_VACUOLAR_TRANSPORT		237	0.436766	1.81525	0.00211864	0.0499831	0.823	4726	tags=37%, list=15%, signal=43%
GO_TRANSFORMING_GROWTH_FACTOR_BETA_RECEPTOR_BINDING	GO_TRANSFORMING_GROWTH_FACTOR_BETA_RECEPTOR_BINDING		46	0.506567	1.81432	0.00792079	0.050253	0.826	5585	tags=43%, list=18%, signal=53%
GO_PROTEASE_BINDING	GO_PROTEASE_BINDING		99	0.462604	1.81409	0.00407332	0.0502687	0.826	6632	tags=44%, list=21%, signal=56%
GO_GOLGI_ORGANIZATION	GO_GOLGI_ORGANIZATION		83	0.510407	1.81226	0.0103734	0.0509745	0.83	5797	tags=49%, list=18%, signal=60%
GO_FOREBRAIN_CELL_MIGRATION	GO_FOREBRAIN_CELL_MIGRATION		59	0.515944	1.81196	0.00803213	0.0509839	0.831	4135	tags=32%, list=13%, signal=37%
GO_BETA_CATENIN_DESTRUCTION_COMPLEX_DISASSEMBLY	GO_BETA_CATENIN_DESTRUCTION_COMPLEX_DISASSEMBLY		20	0.59909	1.81173	0.0121951	0.0509877	0.831	2606	tags=40%, list=8%, signal=44%
GO_REGULATION_OF_CARDIAC_MUSCLE_CELL_PROLIFERATION	GO_REGULATION_OF_CARDIAC_MUSCLE_CELL_PROLIFERATION		28	0.544953	1.81132	0.00406504	0.0510161	0.831	8792	tags=64%, list=28%, signal=89%
GO_CARDIAC_VENTRICLE_DEVELOPMENT	GO_CARDIAC_VENTRICLE_DEVELOPMENT		104	0.450797	1.8107	0.00613497	0.0512116	0.832	5331	tags=36%, list=17%, signal=43%
GO_ORGAN_GROWTH	GO_ORGAN_GROWTH		65	0.515968	1.80991	0.00409836	0.0515278	0.833	4575	tags=38%, list=14%, signal=45%
GO_PROTEOGLYCAN_BINDING	GO_PROTEOGLYCAN_BINDING		29	0.581127	1.80968	0.0144928	0.0515054	0.834	3704	tags=41%, list=12%, signal=47%
GO_CELLULAR_RESPONSE_TO_VASCULAR_ENDOTHELIAL_GROWTH_FACTOR_STIMULUS	GO_CELLULAR_RESPONSE_TO_VASCULAR_ENDOTHELIAL_GROWTH_FACTOR_STIMULUS		29	0.595539	1.8094	0.0105485	0.0514985	0.835	2378	tags=31%, list=7%, signal=34%
GO_GTPASE_BINDING	GO_GTPASE_BINDING		282	0.414835	1.80923	0	0.051437	0.835	4816	tags=37%, list=15%, signal=43%
GO_HISTONE_ACETYLTRANSFERASE_BINDING	GO_HISTONE_ACETYLTRANSFERASE_BINDING		28	0.549882	1.80784	0.00207469	0.0519899	0.835	8211	tags=54%, list=26%, signal=72%
GO_POSITIVE_REGULATION_OF_VIRAL_GENOME_REPLICATION	GO_POSITIVE_REGULATION_OF_VIRAL_GENOME_REPLICATION		29	0.57519	1.80781	0.00625	0.0518794	0.835	7197	tags=55%, list=23%, signal=71%
GO_STEM_CELL_DIVISION	GO_STEM_CELL_DIVISION		29	0.555042	1.80709	0.00613497	0.0521376	0.836	4669	tags=41%, list=15%, signal=48%
GO_ER_TO_GOLGI_TRANSPORT_VESICLE_MEMBRANE	GO_ER_TO_GOLGI_TRANSPORT_VESICLE_MEMBRANE		52	0.566376	1.80696	0.0168421	0.0520739	0.836	6366	tags=52%, list=20%, signal=65%
GO_POSITIVE_REGULATION_OF_CELL_GROWTH	GO_POSITIVE_REGULATION_OF_CELL_GROWTH		142	0.419468	1.80663	0	0.0521038	0.836	4565	tags=30%, list=14%, signal=34%
GO_AXON_REGENERATION	GO_AXON_REGENERATION		23	0.588789	1.80654	0.0039604	0.0520345	0.836	7172	tags=57%, list=23%, signal=73%
GO_MICROTUBULE_BINDING	GO_MICROTUBULE_BINDING		189	0.453702	1.80646	0.0138889	0.0519555	0.836	5810	tags=41%, list=18%, signal=50%
GO_SPINDLE_MICROTUBULE	GO_SPINDLE_MICROTUBULE		56	0.565775	1.80626	0.0304878	0.0519122	0.836	6232	tags=55%, list=20%, signal=69%
GO_ESTABLISHMENT_OF_MITOTIC_SPINDLE_LOCALIZATION	GO_ESTABLISHMENT_OF_MITOTIC_SPINDLE_LOCALIZATION		23	0.610848	1.80598	0.0122951	0.0519328	0.837	4135	tags=48%, list=13%, signal=55%
GO_REGULATION_OF_ACTIN_FILAMENT_DEPOLYMERIZATION	GO_REGULATION_OF_ACTIN_FILAMENT_DEPOLYMERIZATION		43	0.527503	1.80565	0.010352	0.0519809	0.837	3483	tags=35%, list=11%, signal=39%
GO_GUANYL_NUCLEOTIDE_BINDING	GO_GUANYL_NUCLEOTIDE_BINDING		357	0.393032	1.80534	0	0.0520502	0.837	5509	tags=35%, list=17%, signal=42%
GO_NEGATIVE_REGULATION_OF_MITOTIC_CELL_CYCLE	GO_NEGATIVE_REGULATION_OF_MITOTIC_CELL_CYCLE		183	0.458793	1.80527	0.0226804	0.0519693	0.837	6415	tags=46%, list=20%, signal=57%
GO_POSITIVE_REGULATION_OF_CYTOPLASMIC_TRANSPORT	GO_POSITIVE_REGULATION_OF_CYTOPLASMIC_TRANSPORT		268	0.384346	1.80525	0	0.0518729	0.837	6428	tags=36%, list=20%, signal=45%
GO_GLUCOSYLTRANSFERASE_ACTIVITY	GO_GLUCOSYLTRANSFERASE_ACTIVITY		16	0.637859	1.80521	0.00401606	0.0517919	0.837	6311	tags=50%, list=20%, signal=62%
GO_CHROMOSOMAL_REGION	GO_CHROMOSOMAL_REGION		290	0.513091	1.80464	0.0375	0.0519053	0.838	6042	tags=49%, list=19%, signal=60%
GO_GOLGI_TO_ENDOSOME_TRANSPORT	GO_GOLGI_TO_ENDOSOME_TRANSPORT		17	0.662755	1.80297	0.00838574	0.0525787	0.839	3459	tags=53%, list=11%, signal=59%
GO_REGULATION_OF_PROTEIN_COMPLEX_ASSEMBLY	GO_REGULATION_OF_PROTEIN_COMPLEX_ASSEMBLY		353	0.39763	1.80212	0	0.0529493	0.842	4413	tags=29%, list=14%, signal=34%
GO_BLASTOCYST_GROWTH	GO_BLASTOCYST_GROWTH		15	0.72016	1.80187	0.0124481	0.0529446	0.842	5702	tags=73%, list=18%, signal=89%
GO_POSITIVE_REGULATION_OF_SMALL_GTPASE_MEDIATED_SIGNAL_TRANSDUCTION	GO_POSITIVE_REGULATION_OF_SMALL_GTPASE_MEDIATED_SIGNAL_TRANSDUCTION		38	0.577694	1.80172	0.006	0.0529317	0.843	4954	tags=45%, list=16%, signal=53%
GO_AMINOGLYCAN_CATABOLIC_PROCESS	GO_AMINOGLYCAN_CATABOLIC_PROCESS		66	0.486413	1.80149	0.00407332	0.0529436	0.844	5270	tags=45%, list=17%, signal=54%
GO_POSITIVE_REGULATION_OF_TRANSMEMBRANE_RECEPTOR_PROTEIN_SERINE_THREONINE_KINASE_SIGNALING_PATHWAY	GO_POSITIVE_REGULATION_OF_TRANSMEMBRANE_RECEPTOR_PROTEIN_SERINE_THREONINE_KINASE_SIGNALING_PATHWAY		96	0.433177	1.80148	0.00399202	0.05283	0.844	5323	tags=38%, list=17%, signal=45%
GO_ESTROGEN_RECEPTOR_BINDING	GO_ESTROGEN_RECEPTOR_BINDING		38	0.503448	1.80121	0.00425532	0.0528407	0.844	5286	tags=45%, list=17%, signal=54%
GO_RESPONSE_TO_AMINO_ACID	GO_RESPONSE_TO_AMINO_ACID		105	0.445988	1.80107	0.00210084	0.0528038	0.844	4894	tags=32%, list=15%, signal=38%
GO_REGULATION_OF_CYTOKINESIS	GO_REGULATION_OF_CYTOKINESIS		54	0.536352	1.80088	0.0218688	0.0527309	0.844	5747	tags=50%, list=18%, signal=61%
GO_NEURON_PROJECTION_EXTENSION	GO_NEURON_PROJECTION_EXTENSION		50	0.548088	1.80065	0.00398406	0.0526935	0.844	4927	tags=44%, list=16%, signal=52%
GO_ACTIVATION_OF_PROTEIN_KINASE_ACTIVITY	GO_ACTIVATION_OF_PROTEIN_KINASE_ACTIVITY		270	0.395853	1.80035	0	0.0527389	0.844	5100	tags=34%, list=16%, signal=40%
GO_CORONARY_VASCULATURE_DEVELOPMENT	GO_CORONARY_VASCULATURE_DEVELOPMENT		36	0.569805	1.80023	0.00394477	0.0526659	0.844	7494	tags=58%, list=24%, signal=76%
GO_VENTRICULAR_SEPTUM_DEVELOPMENT	GO_VENTRICULAR_SEPTUM_DEVELOPMENT		54	0.514758	1.79901	0.0102249	0.0530835	0.845	7494	tags=46%, list=24%, signal=60%
GO_POSITIVE_REGULATION_OF_CELL_CYCLE_PROCESS	GO_POSITIVE_REGULATION_OF_CELL_CYCLE_PROCESS		224	0.432223	1.79866	0.0120724	0.0531044	0.845	6394	tags=43%, list=20%, signal=54%
GO_REGULATION_OF_CELL_PROJECTION_ASSEMBLY	GO_REGULATION_OF_CELL_PROJECTION_ASSEMBLY		139	0.401679	1.79852	0	0.0530605	0.846	2783	tags=25%, list=9%, signal=27%
GO_ENDOCARDIAL_CUSHION_DEVELOPMENT	GO_ENDOCARDIAL_CUSHION_DEVELOPMENT		32	0.549883	1.79809	0.00606061	0.0531701	0.846	5674	tags=41%, list=18%, signal=49%
GO_POSITIVE_REGULATION_OF_EPITHELIAL_CELL_MIGRATION	GO_POSITIVE_REGULATION_OF_EPITHELIAL_CELL_MIGRATION		101	0.456837	1.79787	0	0.0531849	0.846	6485	tags=42%, list=20%, signal=52%
GO_REGULATION_OF_ARP2_3_COMPLEX_MEDIATED_ACTIN_NUCLEATION	GO_REGULATION_OF_ARP2_3_COMPLEX_MEDIATED_ACTIN_NUCLEATION		15	0.605144	1.79755	0.0041841	0.053215	0.846	2578	tags=47%, list=8%, signal=51%
GO_RUFFLE	GO_RUFFLE		152	0.444892	1.79738	0.00816326	0.0531909	0.846	4759	tags=34%, list=15%, signal=39%
GO_INTRACELLULAR_STEROID_HORMONE_RECEPTOR_SIGNALING_PATHWAY	GO_INTRACELLULAR_STEROID_HORMONE_RECEPTOR_SIGNALING_PATHWAY		66	0.49928	1.79627	0.0043573	0.0536805	0.848	4316	tags=41%, list=14%, signal=47%
GO_PROTEIN_LOCALIZATION_TO_NUCLEUS	GO_PROTEIN_LOCALIZATION_TO_NUCLEUS		151	0.435303	1.79586	0.00215054	0.053795	0.849	5341	tags=34%, list=17%, signal=41%
GO_OLFACTORY_LOBE_DEVELOPMENT	GO_OLFACTORY_LOBE_DEVELOPMENT		35	0.528757	1.79565	0.0041841	0.0537829	0.85	8949	tags=60%, list=28%, signal=83%
GO_CELLULAR_RESPONSE_TO_STARVATION	GO_CELLULAR_RESPONSE_TO_STARVATION		109	0.434997	1.79549	0.00420168	0.0537381	0.851	5330	tags=38%, list=17%, signal=45%
GO_REGULATION_OF_CELL_DIVISION	GO_REGULATION_OF_CELL_DIVISION		246	0.442849	1.79534	0.0185567	0.053686	0.851	5750	tags=41%, list=18%, signal=50%
GO_EXTRINSIC_COMPONENT_OF_PLASMA_MEMBRANE	GO_EXTRINSIC_COMPONENT_OF_PLASMA_MEMBRANE		131	0.438806	1.7948	0.006	0.0538941	0.851	6164	tags=34%, list=19%, signal=42%
GO_CELLULAR_RESPONSE_TO_KETONE	GO_CELLULAR_RESPONSE_TO_KETONE		71	0.464919	1.79446	0.00613497	0.0539514	0.853	4763	tags=30%, list=15%, signal=35%
GO_GOLGI_TO_PLASMA_MEMBRANE_TRANSPORT	GO_GOLGI_TO_PLASMA_MEMBRANE_TRANSPORT		41	0.521816	1.79434	0.00621118	0.0538778	0.853	6118	tags=49%, list=19%, signal=60%
GO_POSITIVE_REGULATION_OF_CELLULAR_COMPONENT_BIOGENESIS	GO_POSITIVE_REGULATION_OF_CELLULAR_COMPONENT_BIOGENESIS		376	0.377154	1.79201	0	0.0549306	0.858	4770	tags=28%, list=15%, signal=33%
GO_WNT_SIGNALING_PATHWAY_CALCIUM_MODULATING_PATHWAY	GO_WNT_SIGNALING_PATHWAY_CALCIUM_MODULATING_PATHWAY		34	0.529134	1.79188	0.00584795	0.0548712	0.858	4392	tags=32%, list=14%, signal=38%
GO_CORTICAL_ACTIN_CYTOSKELETON	GO_CORTICAL_ACTIN_CYTOSKELETON		58	0.483702	1.79154	0.00826446	0.054925	0.859	4501	tags=38%, list=14%, signal=44%
GO_GLYCOPROTEIN_CATABOLIC_PROCESS	GO_GLYCOPROTEIN_CATABOLIC_PROCESS		15	0.639938	1.79136	0.00402414	0.0548977	0.86	1461	tags=27%, list=5%, signal=28%
GO_POSITIVE_REGULATION_OF_AUTOPHAGY	GO_POSITIVE_REGULATION_OF_AUTOPHAGY		74	0.481148	1.79134	0.0102881	0.0547866	0.86	7483	tags=54%, list=24%, signal=71%
GO_PHOSPHOLIPID_BINDING	GO_PHOSPHOLIPID_BINDING		346	0.384743	1.79082	0	0.054899	0.861	6443	tags=37%, list=20%, signal=46%
GO_SENSORY_ORGAN_MORPHOGENESIS	GO_SENSORY_ORGAN_MORPHOGENESIS		232	0.400461	1.78976	0.002079	0.0552877	0.863	4422	tags=30%, list=14%, signal=35%
GO_RESPONSE_TO_FLUID_SHEAR_STRESS	GO_RESPONSE_TO_FLUID_SHEAR_STRESS		33	0.542774	1.78917	0.00796813	0.0554774	0.864	5161	tags=39%, list=16%, signal=47%
GO_REGULATION_OF_CARDIAC_MUSCLE_CELL_CONTRACTION	GO_REGULATION_OF_CARDIAC_MUSCLE_CELL_CONTRACTION		27	0.568573	1.78913	0.00413223	0.0553999	0.864	6520	tags=56%, list=21%, signal=70%
GO_LOW_DENSITY_LIPOPROTEIN_PARTICLE_RECEPTOR_BINDING	GO_LOW_DENSITY_LIPOPROTEIN_PARTICLE_RECEPTOR_BINDING		17	0.633764	1.78905	0.00391389	0.0553105	0.864	4788	tags=53%, list=15%, signal=62%
GO_BASAL_PART_OF_CELL	GO_BASAL_PART_OF_CELL		49	0.50409	1.78883	0.00994036	0.0552837	0.864	5797	tags=43%, list=18%, signal=52%
GO_POSITIVE_REGULATION_OF_CYTOSKELETON_ORGANIZATION	GO_POSITIVE_REGULATION_OF_CYTOSKELETON_ORGANIZATION		169	0.398496	1.78848	0	0.0553259	0.864	4464	tags=29%, list=14%, signal=34%
GO_SYMPATHETIC_NERVOUS_SYSTEM_DEVELOPMENT	GO_SYMPATHETIC_NERVOUS_SYSTEM_DEVELOPMENT		21	0.624472	1.78845	0.0139442	0.0552241	0.864	5254	tags=48%, list=17%, signal=57%
GO_REGULATION_OF_GASTRULATION	GO_REGULATION_OF_GASTRULATION		31	0.533299	1.78643	0.00606061	0.0560093	0.868	4214	tags=35%, list=13%, signal=41%
GO_ORGANELLE_SUBCOMPARTMENT	GO_ORGANELLE_SUBCOMPARTMENT		294	0.414769	1.78642	0.00406504	0.0559006	0.868	5711	tags=38%, list=18%, signal=46%
GO_METALLOPEPTIDASE_ACTIVITY	GO_METALLOPEPTIDASE_ACTIVITY		176	0.409033	1.78631	0.00203252	0.0558591	0.868	6161	tags=38%, list=19%, signal=47%
GO_FUCOSYLATION	GO_FUCOSYLATION		21	0.5698	1.78592	0.00445434	0.05596	0.869	2995	tags=38%, list=9%, signal=42%
GO_REPRODUCTIVE_SYSTEM_DEVELOPMENT	GO_REPRODUCTIVE_SYSTEM_DEVELOPMENT		388	0.389883	1.78479	0	0.0564365	0.869	5360	tags=32%, list=17%, signal=38%
GO_FAT_CELL_DIFFERENTIATION	GO_FAT_CELL_DIFFERENTIATION		100	0.435187	1.78457	0.00614754	0.0564193	0.87	8282	tags=49%, list=26%, signal=66%
GO_POSITIVE_REGULATION_OF_CATABOLIC_PROCESS	GO_POSITIVE_REGULATION_OF_CATABOLIC_PROCESS		383	0.403706	1.78387	0.00206612	0.0567607	0.87	4669	tags=32%, list=15%, signal=37%
GO_CELLULAR_RESPONSE_TO_ORGANIC_CYCLIC_COMPOUND	GO_CELLULAR_RESPONSE_TO_ORGANIC_CYCLIC_COMPOUND		441	0.37796	1.78365	0	0.0567316	0.87	5290	tags=32%, list=17%, signal=38%
GO_REGULATION_OF_STEM_CELL_PROLIFERATION	GO_REGULATION_OF_STEM_CELL_PROLIFERATION		84	0.436443	1.78318	0.0020202	0.0568322	0.87	4774	tags=32%, list=15%, signal=38%
GO_REGULATION_OF_MORPHOGENESIS_OF_A_BRANCHING_STRUCTURE	GO_REGULATION_OF_MORPHOGENESIS_OF_A_BRANCHING_STRUCTURE		53	0.479341	1.78281	0.00210526	0.0569419	0.87	7332	tags=45%, list=23%, signal=59%
GO_CAMERA_TYPE_EYE_MORPHOGENESIS	GO_CAMERA_TYPE_EYE_MORPHOGENESIS		96	0.438128	1.78215	0.00618557	0.057113	0.871	3899	tags=34%, list=12%, signal=39%
GO_CHROMOSOME_CENTROMERIC_REGION	GO_CHROMOSOME_CENTROMERIC_REGION		153	0.550181	1.78212	0.0541667	0.0570165	0.871	6042	tags=55%, list=19%, signal=67%
GO_METANEPHROS_DEVELOPMENT	GO_METANEPHROS_DEVELOPMENT		81	0.454345	1.78145	0.00396825	0.0572647	0.872	5353	tags=36%, list=17%, signal=43%
GO_REGULATION_OF_CENTROSOME_CYCLE	GO_REGULATION_OF_CENTROSOME_CYCLE		38	0.575363	1.78133	0.0306748	0.0572248	0.872	4304	tags=53%, list=14%, signal=61%
GO_REGULATION_OF_INTRACELLULAR_PROTEIN_TRANSPORT	GO_REGULATION_OF_INTRACELLULAR_PROTEIN_TRANSPORT		353	0.372974	1.78109	0	0.0572227	0.872	6428	tags=35%, list=20%, signal=44%
GO_BRANCH_ELONGATION_OF_AN_EPITHELIUM	GO_BRANCH_ELONGATION_OF_AN_EPITHELIUM		17	0.608499	1.78105	0.00608519	0.0571245	0.872	6921	tags=47%, list=22%, signal=60%
GO_REGULATION_OF_MITOTIC_CELL_CYCLE	GO_REGULATION_OF_MITOTIC_CELL_CYCLE		443	0.430595	1.78077	0.0186335	0.0571953	0.873	6029	tags=42%, list=19%, signal=51%
GO_PHOSPHATE_TRANSMEMBRANE_TRANSPORTER_ACTIVITY	GO_PHOSPHATE_TRANSMEMBRANE_TRANSPORTER_ACTIVITY		30	0.529307	1.78067	0.0042735	0.0571595	0.873	5287	tags=43%, list=17%, signal=52%
GO_SITE_OF_DOUBLE_STRAND_BREAK	GO_SITE_OF_DOUBLE_STRAND_BREAK		28	0.568681	1.78059	0.0147679	0.0570617	0.873	5733	tags=61%, list=18%, signal=74%
GO_REGULATION_OF_ACTIN_FILAMENT_BUNDLE_ASSEMBLY	GO_REGULATION_OF_ACTIN_FILAMENT_BUNDLE_ASSEMBLY		73	0.464677	1.78012	0.00784314	0.0571585	0.873	5797	tags=38%, list=18%, signal=47%
GO_SMALL_GTPASE_MEDIATED_SIGNAL_TRANSDUCTION	GO_SMALL_GTPASE_MEDIATED_SIGNAL_TRANSDUCTION		341	0.38995	1.78009	0	0.0570563	0.873	5655	tags=36%, list=18%, signal=44%
GO_VENOUS_BLOOD_VESSEL_DEVELOPMENT	GO_VENOUS_BLOOD_VESSEL_DEVELOPMENT		15	0.641919	1.78008	0.00792079	0.0569518	0.873	3659	tags=47%, list=12%, signal=53%
GO_COSTAMERE	GO_COSTAMERE		19	0.752068	1.78004	0.0102669	0.0568591	0.873	5919	tags=68%, list=19%, signal=84%
GO_REGULATION_OF_CELLULAR_COMPONENT_SIZE	GO_REGULATION_OF_CELLULAR_COMPONENT_SIZE		323	0.382157	1.77998	0	0.0567721	0.873	4380	tags=28%, list=14%, signal=32%
GO_CHONDROITIN_SULFATE_BIOSYNTHETIC_PROCESS	GO_CHONDROITIN_SULFATE_BIOSYNTHETIC_PROCESS		25	0.648475	1.77935	0.027027	0.056992	0.874	6316	tags=64%, list=20%, signal=80%
GO_POSITIVE_REGULATION_OF_PROTEIN_IMPORT	GO_POSITIVE_REGULATION_OF_PROTEIN_IMPORT		101	0.44028	1.77928	0.00998004	0.0569168	0.874	6428	tags=41%, list=20%, signal=51%
GO_EPIDERMAL_GROWTH_FACTOR_RECEPTOR_BINDING	GO_EPIDERMAL_GROWTH_FACTOR_RECEPTOR_BINDING		30	0.551359	1.77903	0.0102459	0.0569112	0.874	1537	tags=33%, list=5%, signal=35%
GO_CELL_CELL_CONTACT_ZONE	GO_CELL_CELL_CONTACT_ZONE		63	0.495744	1.77884	0.00429185	0.0569003	0.874	6520	tags=48%, list=21%, signal=60%
GO_HETEROTYPIC_CELL_CELL_ADHESION	GO_HETEROTYPIC_CELL_CELL_ADHESION		27	0.62235	1.77788	0.00639659	0.0572763	0.876	4960	tags=41%, list=16%, signal=48%
GO_NEGATIVE_REGULATION_OF_CELL_JUNCTION_ASSEMBLY	GO_NEGATIVE_REGULATION_OF_CELL_JUNCTION_ASSEMBLY		19	0.64163	1.7777	0.0181818	0.0572898	0.877	3104	tags=53%, list=10%, signal=58%
GO_AXON_EXTENSION	GO_AXON_EXTENSION		35	0.577286	1.77758	0.0120482	0.0572303	0.877	6536	tags=51%, list=21%, signal=65%
GO_MEMBRANE_PROTEIN_PROTEOLYSIS	GO_MEMBRANE_PROTEIN_PROTEOLYSIS		34	0.527747	1.77758	0.00416667	0.0571204	0.877	3861	tags=38%, list=12%, signal=43%
GO_MICROTUBULE_ORGANIZING_CENTER_ORGANIZATION	GO_MICROTUBULE_ORGANIZING_CENTER_ORGANIZATION		80	0.489104	1.77569	0.0165975	0.0578689	0.878	6201	tags=55%, list=20%, signal=68%
GO_ORGANELLE_LOCALIZATION	GO_ORGANELLE_LOCALIZATION		392	0.409484	1.77565	0.00200401	0.0577806	0.878	5701	tags=39%, list=18%, signal=47%
GO_REGULATION_OF_PROTEIN_TARGETING	GO_REGULATION_OF_PROTEIN_TARGETING		284	0.375101	1.77536	0	0.0578139	0.878	6428	tags=36%, list=20%, signal=44%
GO_PALLIUM_DEVELOPMENT	GO_PALLIUM_DEVELOPMENT		149	0.435156	1.77528	0.00604839	0.0577347	0.878	5483	tags=37%, list=17%, signal=44%
GO_NEGATIVE_REGULATION_OF_CELL_CYCLE_PHASE_TRANSITION	GO_NEGATIVE_REGULATION_OF_CELL_CYCLE_PHASE_TRANSITION		137	0.468871	1.77452	0.0222672	0.0580909	0.88	6562	tags=48%, list=21%, signal=60%
GO_COPI_COATED_VESICLE_MEMBRANE	GO_COPI_COATED_VESICLE_MEMBRANE		16	0.748586	1.77447	0.00814664	0.057992	0.88	3468	tags=63%, list=11%, signal=70%
GO_SMOOTH_MUSCLE_CONTRACTION	GO_SMOOTH_MUSCLE_CONTRACTION		45	0.560638	1.77438	0.00595238	0.0579398	0.88	5823	tags=49%, list=18%, signal=60%
GO_MAMMARY_GLAND_EPITHELIUM_DEVELOPMENT	GO_MAMMARY_GLAND_EPITHELIUM_DEVELOPMENT		53	0.487467	1.77384	0.00632911	0.0580967	0.88	5905	tags=34%, list=19%, signal=42%
GO_MODULATION_BY_SYMBIONT_OF_HOST_CELLULAR_PROCESS	GO_MODULATION_BY_SYMBIONT_OF_HOST_CELLULAR_PROCESS		28	0.545917	1.77315	0.00606061	0.0582804	0.881	3315	tags=39%, list=10%, signal=44%
GO_MUSCLE_ORGAN_DEVELOPMENT	GO_MUSCLE_ORGAN_DEVELOPMENT		257	0.416431	1.77256	0.00203252	0.0585141	0.882	5519	tags=36%, list=17%, signal=43%
GO_POSITIVE_REGULATION_OF_CELL_CYCLE	GO_POSITIVE_REGULATION_OF_CELL_CYCLE		305	0.40072	1.7725	0.00401606	0.0584493	0.882	6433	tags=41%, list=20%, signal=51%
GO_GLYCOSAMINOGLYCAN_BINDING	GO_GLYCOSAMINOGLYCAN_BINDING		195	0.454844	1.77133	0.0138067	0.058914	0.882	6921	tags=41%, list=22%, signal=52%
GO_CELLULAR_RESPONSE_TO_GAMMA_RADIATION	GO_CELLULAR_RESPONSE_TO_GAMMA_RADIATION		19	0.629154	1.77117	0.00806452	0.0588863	0.882	5687	tags=47%, list=18%, signal=58%
GO_REGULATION_OF_PROTEIN_AUTOPHOSPHORYLATION	GO_REGULATION_OF_PROTEIN_AUTOPHOSPHORYLATION		35	0.510327	1.77083	0.00998004	0.0589431	0.882	8174	tags=49%, list=26%, signal=65%
GO_PHOSPHATIDYLINOSITOL_4_5_BISPHOSPHATE_BINDING	GO_PHOSPHATIDYLINOSITOL_4_5_BISPHOSPHATE_BINDING		47	0.470261	1.77077	0.00582524	0.0588659	0.882	8345	tags=51%, list=26%, signal=69%
GO_NITRIC_OXIDE_SYNTHASE_BINDING	GO_NITRIC_OXIDE_SYNTHASE_BINDING		19	0.58414	1.77002	0.010352	0.0591014	0.882	6232	tags=53%, list=20%, signal=65%
GO_CLATHRIN_COATED_VESICLE	GO_CLATHRIN_COATED_VESICLE		153	0.427787	1.76949	0.00200401	0.0592703	0.882	6407	tags=42%, list=20%, signal=52%
GO_PROTEIN_POLYUBIQUITINATION	GO_PROTEIN_POLYUBIQUITINATION		236	0.435614	1.76864	0.00829876	0.0596277	0.883	5906	tags=42%, list=19%, signal=52%
GO_CELL_AGING	GO_CELL_AGING		65	0.457736	1.76805	0.00612245	0.0598239	0.883	7913	tags=52%, list=25%, signal=70%
GO_MAMMARY_GLAND_MORPHOGENESIS	GO_MAMMARY_GLAND_MORPHOGENESIS		39	0.521511	1.76771	0	0.0598863	0.883	5905	tags=41%, list=19%, signal=50%
GO_CELLULAR_RESPONSE_TO_EXTRACELLULAR_STIMULUS	GO_CELLULAR_RESPONSE_TO_EXTRACELLULAR_STIMULUS		180	0.405428	1.76748	0.00210084	0.0598719	0.883	5330	tags=36%, list=17%, signal=42%
GO_CELL_CELL_JUNCTION	GO_CELL_CELL_JUNCTION		359	0.389552	1.76722	0.00205761	0.0599269	0.883	5719	tags=33%, list=18%, signal=39%
GO_NEGATIVE_REGULATION_OF_PROTEIN_COMPLEX_ASSEMBLY	GO_NEGATIVE_REGULATION_OF_PROTEIN_COMPLEX_ASSEMBLY		101	0.426834	1.76669	0	0.060086	0.884	4552	tags=31%, list=14%, signal=36%
GO_CARDIAC_CHAMBER_MORPHOGENESIS	GO_CARDIAC_CHAMBER_MORPHOGENESIS		102	0.437892	1.76592	0.00407332	0.0603549	0.884	5319	tags=33%, list=17%, signal=40%
GO_TRANSFORMING_GROWTH_FACTOR_BETA_BINDING	GO_TRANSFORMING_GROWTH_FACTOR_BETA_BINDING		16	0.745467	1.76577	0.0158416	0.0603093	0.885	5270	tags=63%, list=17%, signal=75%
GO_REGULATION_OF_ORGANELLE_ASSEMBLY	GO_REGULATION_OF_ORGANELLE_ASSEMBLY		139	0.420303	1.76558	0.004	0.0602914	0.886	4626	tags=34%, list=15%, signal=39%
GO_GOLGI_LUMEN	GO_GOLGI_LUMEN		86	0.450559	1.76543	0.00406504	0.0602787	0.886	5930	tags=40%, list=19%, signal=48%
GO_ANTIGEN_PROCESSING_AND_PRESENTATION_OF_PEPTIDE_ANTIGEN	GO_ANTIGEN_PROCESSING_AND_PRESENTATION_OF_PEPTIDE_ANTIGEN		169	0.491887	1.76519	0.0240481	0.0602799	0.886	5260	tags=40%, list=17%, signal=48%
GO_PROTEIN_LOCALIZATION_TO_CELL_SURFACE	GO_PROTEIN_LOCALIZATION_TO_CELL_SURFACE		22	0.614866	1.76518	0.0100402	0.0601819	0.886	8268	tags=77%, list=26%, signal=104%
GO_MODULATION_BY_VIRUS_OF_HOST_MORPHOLOGY_OR_PHYSIOLOGY	GO_MODULATION_BY_VIRUS_OF_HOST_MORPHOLOGY_OR_PHYSIOLOGY		37	0.503317	1.76476	0.015748	0.0603013	0.886	4252	tags=41%, list=13%, signal=47%
GO_EMBRYONIC_HEART_TUBE_DEVELOPMENT	GO_EMBRYONIC_HEART_TUBE_DEVELOPMENT		69	0.437079	1.76443	0.00209644	0.0603516	0.887	5575	tags=39%, list=18%, signal=47%
GO_ENDOCYTOSIS	GO_ENDOCYTOSIS		486	0.405587	1.7643	0.00408163	0.0603116	0.888	5456	tags=32%, list=17%, signal=38%
GO_COCHLEA_MORPHOGENESIS	GO_COCHLEA_MORPHOGENESIS		21	0.60234	1.76428	0.0102041	0.0602158	0.888	4422	tags=48%, list=14%, signal=55%
GO_RESPONSE_TO_CALCIUM_ION	GO_RESPONSE_TO_CALCIUM_ION		112	0.406713	1.76404	0.00204918	0.0602432	0.888	4756	tags=35%, list=15%, signal=41%
GO_INTERACTION_WITH_HOST	GO_INTERACTION_WITH_HOST		127	0.461532	1.76375	0.00809717	0.0602964	0.888	5630	tags=38%, list=18%, signal=46%
GO_GANGLIOSIDE_BIOSYNTHETIC_PROCESS	GO_GANGLIOSIDE_BIOSYNTHETIC_PROCESS		17	0.620254	1.76339	0.00782779	0.0603571	0.888	7206	tags=59%, list=23%, signal=76%
GO_MAMMARY_GLAND_DEVELOPMENT	GO_MAMMARY_GLAND_DEVELOPMENT		113	0.425257	1.76293	0	0.0605031	0.889	6079	tags=34%, list=19%, signal=41%
GO_STEM_CELL_DIFFERENTIATION	GO_STEM_CELL_DIFFERENTIATION		185	0.425247	1.76271	0	0.0605374	0.89	5031	tags=31%, list=16%, signal=37%
GO_CELLULAR_RESPONSE_TO_DSRNA	GO_CELLULAR_RESPONSE_TO_DSRNA		32	0.513914	1.76199	0.00612245	0.0608687	0.893	3358	tags=38%, list=11%, signal=42%
GO_PROTEIN_LOCALIZATION_TO_CYTOSKELETON	GO_PROTEIN_LOCALIZATION_TO_CYTOSKELETON		28	0.58027	1.76139	0.0144033	0.0611112	0.897	5994	tags=57%, list=19%, signal=70%
GO_POSITIVE_REGULATION_OF_CELL_DEVELOPMENT	GO_POSITIVE_REGULATION_OF_CELL_DEVELOPMENT		448	0.388747	1.7612	0	0.0610948	0.897	5415	tags=32%, list=17%, signal=38%
GO_POSITIVE_REGULATION_OF_INTRACELLULAR_TRANSPORT	GO_POSITIVE_REGULATION_OF_INTRACELLULAR_TRANSPORT		344	0.370231	1.76096	0	0.0611251	0.897	6428	tags=35%, list=20%, signal=44%
GO_FRIZZLED_BINDING	GO_FRIZZLED_BINDING		35	0.534404	1.76082	0.00792079	0.0610872	0.897	3837	tags=37%, list=12%, signal=42%
GO_NEGATIVE_REGULATION_OF_CELLULAR_PROTEIN_LOCALIZATION	GO_NEGATIVE_REGULATION_OF_CELLULAR_PROTEIN_LOCALIZATION		131	0.407582	1.76058	0.00198807	0.0610923	0.897	5815	tags=35%, list=18%, signal=43%
GO_CELLULAR_RESPONSE_TO_LIPID	GO_CELLULAR_RESPONSE_TO_LIPID		433	0.377163	1.75976	0.00204918	0.0614238	0.897	5465	tags=32%, list=17%, signal=39%
GO_PROSTATE_GLAND_MORPHOGENESIS	GO_PROSTATE_GLAND_MORPHOGENESIS		23	0.538518	1.75976	0.00406504	0.0613155	0.897	6652	tags=48%, list=21%, signal=60%
GO_STEM_CELL_PROLIFERATION	GO_STEM_CELL_PROLIFERATION		59	0.475288	1.75921	0.00402414	0.0614791	0.897	4135	tags=32%, list=13%, signal=37%
GO_HEART_VALVE_DEVELOPMENT	GO_HEART_VALVE_DEVELOPMENT		32	0.560678	1.75916	0.0119522	0.0613969	0.897	8273	tags=63%, list=26%, signal=84%
GO_NEPHRON_EPITHELIUM_DEVELOPMENT	GO_NEPHRON_EPITHELIUM_DEVELOPMENT		93	0.423984	1.75906	0.00396825	0.061345	0.897	5353	tags=32%, list=17%, signal=39%
GO_SMOOTH_MUSCLE_TISSUE_DEVELOPMENT	GO_SMOOTH_MUSCLE_TISSUE_DEVELOPMENT		18	0.614679	1.75902	0.00621118	0.0612514	0.897	6635	tags=56%, list=21%, signal=70%
GO_HEPARIN_BINDING	GO_HEPARIN_BINDING		151	0.453773	1.75872	0.0119284	0.0613003	0.897	7057	tags=42%, list=22%, signal=53%
GO_FIBRIL_ORGANIZATION	GO_FIBRIL_ORGANIZATION		19	0.612939	1.75826	0.0139442	0.0614915	0.898	3040	tags=42%, list=10%, signal=47%
GO_MUSCLE_CELL_DIFFERENTIATION	GO_MUSCLE_CELL_DIFFERENTIATION		220	0.4169	1.75821	0.00211864	0.0614056	0.898	4626	tags=32%, list=15%, signal=38%
GO_MEMBRANE_ASSEMBLY	GO_MEMBRANE_ASSEMBLY		25	0.557561	1.75818	0.0124481	0.0613181	0.898	6406	tags=52%, list=20%, signal=65%
GO_LENS_DEVELOPMENT_IN_CAMERA_TYPE_EYE	GO_LENS_DEVELOPMENT_IN_CAMERA_TYPE_EYE		59	0.467924	1.75694	0.00792079	0.0618409	0.898	3802	tags=32%, list=12%, signal=37%
GO_POSTTRANSCRIPTIONAL_GENE_SILENCING	GO_POSTTRANSCRIPTIONAL_GENE_SILENCING		36	0.513003	1.75427	0.00828157	0.0631792	0.9	2848	tags=31%, list=9%, signal=34%
GO_TRANSCRIPTION_FACTOR_ACTIVITY_RNA_POLYMERASE_II_TRANSCRIPTION_FACTOR_BINDING	GO_TRANSCRIPTION_FACTOR_ACTIVITY_RNA_POLYMERASE_II_TRANSCRIPTION_FACTOR_BINDING		128	0.401976	1.75421	0.0102669	0.0630918	0.9	5607	tags=35%, list=18%, signal=43%
GO_GANGLIOSIDE_METABOLIC_PROCESS	GO_GANGLIOSIDE_METABOLIC_PROCESS		24	0.551668	1.75385	0.00589391	0.063165	0.9	7206	tags=54%, list=23%, signal=70%
GO_PEPTIDYL_THREONINE_MODIFICATION	GO_PEPTIDYL_THREONINE_MODIFICATION		44	0.527649	1.75351	0.0125523	0.0632452	0.9	7672	tags=59%, list=24%, signal=78%
GO_NEURON_PROJECTION_MORPHOGENESIS	GO_NEURON_PROJECTION_MORPHOGENESIS		383	0.420271	1.75269	0.00403226	0.0636722	0.902	6130	tags=36%, list=19%, signal=44%
GO_KIDNEY_MESENCHYME_DEVELOPMENT	GO_KIDNEY_MESENCHYME_DEVELOPMENT		17	0.595405	1.75231	0.00787402	0.0637775	0.903	4829	tags=47%, list=15%, signal=55%
GO_POSITIVE_REGULATION_OF_CELL_MORPHOGENESIS_INVOLVED_IN_DIFFERENTIATION	GO_POSITIVE_REGULATION_OF_CELL_MORPHOGENESIS_INVOLVED_IN_DIFFERENTIATION		158	0.420199	1.75231	0.00208333	0.0636707	0.903	5024	tags=34%, list=16%, signal=40%
GO_CENTROSOME	GO_CENTROSOME		459	0.397789	1.75091	0.0138614	0.0643028	0.906	6232	tags=40%, list=20%, signal=49%
GO_REGULATION_OF_RECEPTOR_BIOSYNTHETIC_PROCESS	GO_REGULATION_OF_RECEPTOR_BIOSYNTHETIC_PROCESS		20	0.572071	1.75015	0.00621118	0.0646047	0.906	3302	tags=35%, list=10%, signal=39%
GO_CYTOKINE_BINDING	GO_CYTOKINE_BINDING		87	0.543166	1.74972	0.022	0.0647357	0.906	5270	tags=43%, list=17%, signal=51%
GO_NEGATIVE_REGULATION_OF_LIPID_TRANSPORT	GO_NEGATIVE_REGULATION_OF_LIPID_TRANSPORT		26	0.570758	1.74961	0.0166667	0.0646785	0.906	1826	tags=31%, list=6%, signal=33%
GO_POSITIVE_REGULATION_OF_CYTOKINESIS	GO_POSITIVE_REGULATION_OF_CYTOKINESIS		26	0.608987	1.74885	0.0242424	0.0649783	0.906	4685	tags=54%, list=15%, signal=63%
GO_REGULATION_OF_CELL_CYCLE_PHASE_TRANSITION	GO_REGULATION_OF_CELL_CYCLE_PHASE_TRANSITION		308	0.440814	1.74884	0.0326531	0.0648703	0.906	6029	tags=43%, list=19%, signal=53%
GO_ENDOMEMBRANE_SYSTEM_ORGANIZATION	GO_ENDOMEMBRANE_SYSTEM_ORGANIZATION		446	0.394481	1.74803	0	0.0652866	0.906	4551	tags=33%, list=14%, signal=38%
GO_MICROTUBULE_BASED_PROCESS	GO_MICROTUBULE_BASED_PROCESS		480	0.403672	1.74797	0.0119284	0.0652289	0.906	5999	tags=40%, list=19%, signal=49%
GO_POSITIVE_REGULATION_OF_MUSCLE_CELL_DIFFERENTIATION	GO_POSITIVE_REGULATION_OF_MUSCLE_CELL_DIFFERENTIATION		77	0.462058	1.74764	0.00416667	0.0652641	0.907	4757	tags=36%, list=15%, signal=43%
GO_REGULATION_OF_PROTEIN_LOCALIZATION_TO_NUCLEUS	GO_REGULATION_OF_PROTEIN_LOCALIZATION_TO_NUCLEUS		212	0.392962	1.74757	0.0040404	0.0651886	0.907	5628	tags=35%, list=18%, signal=42%
GO_NEGATIVE_REGULATION_OF_NERVOUS_SYSTEM_DEVELOPMENT	GO_NEGATIVE_REGULATION_OF_NERVOUS_SYSTEM_DEVELOPMENT		250	0.400471	1.7475	0	0.0651099	0.908	6562	tags=36%, list=21%, signal=45%
GO_GLYCOSYLATION	GO_GLYCOSYLATION		249	0.418305	1.74731	0.00210526	0.0651112	0.908	7220	tags=44%, list=23%, signal=57%
GO_FILOPODIUM_MEMBRANE	GO_FILOPODIUM_MEMBRANE		18	0.588775	1.74723	0.0123711	0.0650357	0.908	6247	tags=56%, list=20%, signal=69%
GO_NEGATIVE_REGULATION_OF_EXOCYTOSIS	GO_NEGATIVE_REGULATION_OF_EXOCYTOSIS		26	0.557226	1.74718	0.0159046	0.0649551	0.908	7639	tags=54%, list=24%, signal=71%
GO_REGULATION_OF_ENDOCYTOSIS	GO_REGULATION_OF_ENDOCYTOSIS		196	0.396255	1.74674	0	0.065131	0.91	4658	tags=30%, list=15%, signal=34%
GO_RESPONSE_TO_AXON_INJURY	GO_RESPONSE_TO_AXON_INJURY		47	0.491686	1.74659	0.00588235	0.0651396	0.911	7348	tags=53%, list=23%, signal=69%
GO_GROWTH_FACTOR_RECEPTOR_BINDING	GO_GROWTH_FACTOR_RECEPTOR_BINDING		120	0.415784	1.74638	0.00614754	0.0651719	0.911	5386	tags=33%, list=17%, signal=40%
GO_GLOMERULUS_DEVELOPMENT	GO_GLOMERULUS_DEVELOPMENT		49	0.56232	1.74575	0.0334646	0.0654142	0.913	4813	tags=39%, list=15%, signal=46%
GO_REGULATION_OF_MYELINATION	GO_REGULATION_OF_MYELINATION		29	0.519953	1.74517	0.00579151	0.0655898	0.913	5866	tags=41%, list=18%, signal=51%
GO_PIGMENTATION	GO_PIGMENTATION		80	0.439311	1.74481	0.00608519	0.0656523	0.913	5496	tags=41%, list=17%, signal=50%
GO_RHO_GTPASE_BINDING	GO_RHO_GTPASE_BINDING		76	0.460392	1.74465	0.00838574	0.0656219	0.913	2861	tags=33%, list=9%, signal=36%
GO_DNA_GEOMETRIC_CHANGE	GO_DNA_GEOMETRIC_CHANGE		78	0.528753	1.74455	0.0506073	0.0655762	0.913	5845	tags=50%, list=18%, signal=61%
GO_CYTOSKELETON_DEPENDENT_INTRACELLULAR_TRANSPORT	GO_CYTOSKELETON_DEPENDENT_INTRACELLULAR_TRANSPORT		109	0.482423	1.74428	0.028169	0.0656077	0.913	5040	tags=42%, list=16%, signal=50%
GO_LAMELLIPODIUM_ORGANIZATION	GO_LAMELLIPODIUM_ORGANIZATION		34	0.501292	1.74396	0.0135922	0.0656657	0.915	7341	tags=47%, list=23%, signal=61%
GO_NEGATIVE_REGULATION_OF_CELL_ADHESION	GO_NEGATIVE_REGULATION_OF_CELL_ADHESION		211	0.437272	1.74393	0.00408998	0.0655796	0.915	4220	tags=29%, list=13%, signal=34%
GO_HEMOSTASIS	GO_HEMOSTASIS		287	0.393287	1.74379	0.00205761	0.0655747	0.915	4276	tags=26%, list=13%, signal=30%
GO_POLYPEPTIDE_N_ACETYLGALACTOSAMINYLTRANSFERASE_ACTIVITY	GO_POLYPEPTIDE_N_ACETYLGALACTOSAMINYLTRANSFERASE_ACTIVITY		16	0.668605	1.74351	0.0123967	0.0655942	0.915	5485	tags=50%, list=17%, signal=60%
GO_PLACENTA_DEVELOPMENT	GO_PLACENTA_DEVELOPMENT		134	0.425802	1.74293	0.00609756	0.0657853	0.916	6913	tags=41%, list=22%, signal=52%
GO_NEURAL_CREST_CELL_DIFFERENTIATION	GO_NEURAL_CREST_CELL_DIFFERENTIATION		73	0.453254	1.74282	0.00203666	0.0657158	0.916	9260	tags=60%, list=29%, signal=85%
GO_PROTEIN_K48_LINKED_DEUBIQUITINATION	GO_PROTEIN_K48_LINKED_DEUBIQUITINATION		19	0.579386	1.74278	0.0143737	0.0656286	0.916	1155	tags=37%, list=4%, signal=38%
GO_SCHWANN_CELL_DIFFERENTIATION	GO_SCHWANN_CELL_DIFFERENTIATION		30	0.55621	1.74256	0.00835073	0.0656411	0.916	7961	tags=50%, list=25%, signal=67%
GO_PROTEIN_TARGETING_TO_LYSOSOME	GO_PROTEIN_TARGETING_TO_LYSOSOME		15	0.657666	1.74186	0.012605	0.0659478	0.917	4133	tags=73%, list=13%, signal=84%
GO_TONGUE_DEVELOPMENT	GO_TONGUE_DEVELOPMENT		19	0.582055	1.7416	0.00598802	0.0659991	0.917	5743	tags=37%, list=18%, signal=45%
GO_AORTA_DEVELOPMENT	GO_AORTA_DEVELOPMENT		41	0.535116	1.74097	0.0226337	0.066278	0.917	7494	tags=59%, list=24%, signal=77%
GO_POLYSACCHARIDE_METABOLIC_PROCESS	GO_POLYSACCHARIDE_METABOLIC_PROCESS		78	0.451166	1.74095	0.00200803	0.0661796	0.917	5024	tags=37%, list=16%, signal=44%
GO_REGULATION_OF_MUSCLE_CELL_DIFFERENTIATION	GO_REGULATION_OF_MUSCLE_CELL_DIFFERENTIATION		141	0.401632	1.74044	0.00419287	0.066343	0.918	4757	tags=30%, list=15%, signal=35%
GO_POLYSACCHARIDE_BIOSYNTHETIC_PROCESS	GO_POLYSACCHARIDE_BIOSYNTHETIC_PROCESS		41	0.495904	1.74008	0.00619835	0.0664039	0.919	5024	tags=37%, list=16%, signal=43%
GO_POSITIVE_REGULATION_OF_PROTEIN_AUTOPHOSPHORYLATION	GO_POSITIVE_REGULATION_OF_PROTEIN_AUTOPHOSPHORYLATION		21	0.550676	1.74006	0.00982318	0.0663142	0.919	7174	tags=52%, list=23%, signal=68%
GO_ACTIN_CYTOSKELETON_REORGANIZATION	GO_ACTIN_CYTOSKELETON_REORGANIZATION		54	0.512726	1.73985	0.0100402	0.0663069	0.919	4380	tags=37%, list=14%, signal=43%
GO_TRANSFERASE_ACTIVITY_TRANSFERRING_HEXOSYL_GROUPS	GO_TRANSFERASE_ACTIVITY_TRANSFERRING_HEXOSYL_GROUPS		184	0.427632	1.73971	0.00647948	0.0662676	0.919	6418	tags=39%, list=20%, signal=49%
GO_REGULATION_OF_MUSCLE_ADAPTATION	GO_REGULATION_OF_MUSCLE_ADAPTATION		60	0.453999	1.73958	0.00202429	0.0662174	0.919	5420	tags=37%, list=17%, signal=44%
GO_POSITIVE_REGULATION_OF_MRNA_3_END_PROCESSING	GO_POSITIVE_REGULATION_OF_MRNA_3_END_PROCESSING		16	0.600062	1.73931	0.0164948	0.0662594	0.92	3577	tags=44%, list=11%, signal=49%
GO_EMBRYONIC_SKELETAL_SYSTEM_MORPHOGENESIS	GO_EMBRYONIC_SKELETAL_SYSTEM_MORPHOGENESIS		91	0.469296	1.73886	0.012685	0.0663902	0.921	4422	tags=30%, list=14%, signal=34%
GO_NEGATIVE_REGULATION_OF_CYTOPLASMIC_TRANSPORT	GO_NEGATIVE_REGULATION_OF_CYTOPLASMIC_TRANSPORT		113	0.413993	1.73885	0.00587084	0.0662935	0.921	5459	tags=34%, list=17%, signal=40%
GO_NEGATIVE_REGULATION_OF_LOCOMOTION	GO_NEGATIVE_REGULATION_OF_LOCOMOTION		248	0.409148	1.73877	0.011976	0.0662444	0.921	6439	tags=36%, list=20%, signal=45%
GO_NEGATIVE_REGULATION_OF_CELL_CYCLE_PROCESS	GO_NEGATIVE_REGULATION_OF_CELL_CYCLE_PROCESS		199	0.433209	1.73786	0.0384615	0.0666622	0.921	6415	tags=44%, list=20%, signal=54%
GO_STEROID_HORMONE_RECEPTOR_BINDING	GO_STEROID_HORMONE_RECEPTOR_BINDING		79	0.439927	1.73693	0.00630252	0.0671233	0.921	7063	tags=48%, list=22%, signal=62%
GO_ESTABLISHMENT_OF_PROTEIN_LOCALIZATION_TO_GOLGI	GO_ESTABLISHMENT_OF_PROTEIN_LOCALIZATION_TO_GOLGI		18	0.652379	1.73664	0.012474	0.0671828	0.921	4133	tags=50%, list=13%, signal=57%
GO_ACTIVATION_OF_PROTEIN_KINASE_B_ACTIVITY	GO_ACTIVATION_OF_PROTEIN_KINASE_B_ACTIVITY		21	0.546612	1.7363	0.00787402	0.067317	0.921	2769	tags=33%, list=9%, signal=36%
GO_SPINDLE_ASSEMBLY	GO_SPINDLE_ASSEMBLY		68	0.522425	1.73582	0.0395833	0.0674709	0.923	5845	tags=56%, list=18%, signal=68%
GO_NEGATIVE_REGULATION_OF_NUCLEOCYTOPLASMIC_TRANSPORT	GO_NEGATIVE_REGULATION_OF_NUCLEOCYTOPLASMIC_TRANSPORT		69	0.435301	1.73566	0.00606061	0.0674622	0.923	2273	tags=23%, list=7%, signal=25%
GO_REGULATION_OF_SULFUR_METABOLIC_PROCESS	GO_REGULATION_OF_SULFUR_METABOLIC_PROCESS		19	0.620464	1.73534	0.0140845	0.0675472	0.924	5566	tags=47%, list=18%, signal=57%
GO_DOUBLE_STRANDED_RNA_BINDING	GO_DOUBLE_STRANDED_RNA_BINDING		59	0.516897	1.73459	0.0226337	0.0678411	0.924	5742	tags=47%, list=18%, signal=58%
GO_REGULATION_OF_CELLULAR_SENESCENCE	GO_REGULATION_OF_CELLULAR_SENESCENCE		26	0.544451	1.73448	0.00831601	0.0677931	0.924	4314	tags=38%, list=14%, signal=44%
GO_VESICLE_COATING	GO_VESICLE_COATING		73	0.50367	1.73427	0.0165631	0.0677881	0.925	4975	tags=42%, list=16%, signal=50%
GO_NEGATIVE_REGULATION_OF_STEM_CELL_PROLIFERATION	GO_NEGATIVE_REGULATION_OF_STEM_CELL_PROLIFERATION		15	0.654734	1.73359	0.0103734	0.06807	0.926	3611	tags=40%, list=11%, signal=45%
GO_NEGATIVE_REGULATION_OF_SMOOTH_MUSCLE_CELL_MIGRATION	GO_NEGATIVE_REGULATION_OF_SMOOTH_MUSCLE_CELL_MIGRATION		16	0.625909	1.73334	0.0105932	0.0680994	0.926	3268	tags=44%, list=10%, signal=49%
GO_CELLULAR_RESPONSE_TO_CARBOHYDRATE_STIMULUS	GO_CELLULAR_RESPONSE_TO_CARBOHYDRATE_STIMULUS		69	0.435741	1.73217	0.00622407	0.0686299	0.926	4861	tags=35%, list=15%, signal=41%
GO_CELL_CELL_JUNCTION_ASSEMBLY	GO_CELL_CELL_JUNCTION_ASSEMBLY		71	0.471191	1.73201	0.00628931	0.0686063	0.926	3607	tags=34%, list=11%, signal=38%
GO_MICROVILLUS_MEMBRANE	GO_MICROVILLUS_MEMBRANE		19	0.596024	1.73174	0.0232068	0.0686718	0.926	1816	tags=26%, list=6%, signal=28%
GO_POSITIVE_REGULATION_OF_AXON_EXTENSION	GO_POSITIVE_REGULATION_OF_AXON_EXTENSION		35	0.560422	1.73144	0.0164609	0.0687051	0.926	2024	tags=31%, list=6%, signal=34%
GO_CHROMOSOME_TELOMERIC_REGION	GO_CHROMOSOME_TELOMERIC_REGION		143	0.480024	1.73143	0.0325866	0.0686032	0.926	5798	tags=43%, list=18%, signal=53%
GO_REGULATION_OF_SPROUTING_ANGIOGENESIS	GO_REGULATION_OF_SPROUTING_ANGIOGENESIS		28	0.545254	1.73142	0.00803213	0.068507	0.926	5161	tags=43%, list=16%, signal=51%
GO_REGULATION_OF_MEMBRANE_LIPID_DISTRIBUTION	GO_REGULATION_OF_MEMBRANE_LIPID_DISTRIBUTION		35	0.489908	1.73093	0.0155039	0.0687037	0.926	4319	tags=37%, list=14%, signal=43%
GO_INTRINSIC_APOPTOTIC_SIGNALING_PATHWAY_IN_RESPONSE_TO_DNA_DAMAGE_BY_P53_CLASS_MEDIATOR	GO_INTRINSIC_APOPTOTIC_SIGNALING_PATHWAY_IN_RESPONSE_TO_DNA_DAMAGE_BY_P53_CLASS_MEDIATOR		29	0.560446	1.73081	0.0233546	0.0686478	0.926	5706	tags=45%, list=18%, signal=55%
GO_REGULATION_OF_ORGAN_GROWTH	GO_REGULATION_OF_ORGAN_GROWTH		70	0.436981	1.72994	0	0.0690314	0.927	3659	tags=30%, list=12%, signal=34%
GO_GTPASE_ACTIVITY	GO_GTPASE_ACTIVITY		234	0.40472	1.72985	0.0039604	0.0689622	0.927	5509	tags=37%, list=17%, signal=44%
GO_TRANSMEMBRANE_RECEPTOR_PROTEIN_TYROSINE_KINASE_ACTIVITY	GO_TRANSMEMBRANE_RECEPTOR_PROTEIN_TYROSINE_KINASE_ACTIVITY		64	0.490083	1.72981	0.010352	0.068877	0.927	4464	tags=34%, list=14%, signal=40%
GO_MODIFICATION_BY_SYMBIONT_OF_HOST_MORPHOLOGY_OR_PHYSIOLOGY	GO_MODIFICATION_BY_SYMBIONT_OF_HOST_MORPHOLOGY_OR_PHYSIOLOGY		45	0.479274	1.72973	0.01	0.0688162	0.927	4252	tags=36%, list=13%, signal=41%
GO_ENDOTHELIAL_CELL_PROLIFERATION	GO_ENDOTHELIAL_CELL_PROLIFERATION		23	0.586107	1.72909	0.00804829	0.0690715	0.928	4464	tags=39%, list=14%, signal=45%
GO_SPINDLE_CHECKPOINT	GO_SPINDLE_CHECKPOINT		23	0.647169	1.72909	0.0482897	0.0689659	0.928	3925	tags=43%, list=12%, signal=50%
GO_PLASMA_MEMBRANE_ORGANIZATION	GO_PLASMA_MEMBRANE_ORGANIZATION		199	0.376088	1.729	0	0.0689283	0.928	3703	tags=28%, list=12%, signal=31%
GO_MEDIATOR_COMPLEX	GO_MEDIATOR_COMPLEX		34	0.508523	1.72856	0.00414079	0.0690417	0.928	2086	tags=26%, list=7%, signal=28%
GO_CELL_CYCLE_PHASE_TRANSITION	GO_CELL_CYCLE_PHASE_TRANSITION		248	0.467942	1.72751	0.0503145	0.0695519	0.93	6103	tags=47%, list=19%, signal=57%
GO_UBIQUITIN_LIKE_PROTEIN_CONJUGATING_ENZYME_BINDING	GO_UBIQUITIN_LIKE_PROTEIN_CONJUGATING_ENZYME_BINDING		33	0.511924	1.72632	0.0204082	0.0700667	0.93	5219	tags=45%, list=16%, signal=54%
GO_PROTEIN_KINASE_C_BINDING	GO_PROTEIN_KINASE_C_BINDING		49	0.462406	1.72629	0.00630252	0.0699716	0.93	2967	tags=29%, list=9%, signal=31%
GO_VESICLE_TARGETING	GO_VESICLE_TARGETING		75	0.500398	1.72605	0.0123457	0.0700142	0.93	5887	tags=47%, list=19%, signal=57%
GO_REGULATION_OF_RECEPTOR_INTERNALIZATION	GO_REGULATION_OF_RECEPTOR_INTERNALIZATION		37	0.493622	1.72593	0.013363	0.069974	0.93	3423	tags=32%, list=11%, signal=36%
GO_POSITIVE_REGULATION_OF_EMBRYONIC_DEVELOPMENT	GO_POSITIVE_REGULATION_OF_EMBRYONIC_DEVELOPMENT		29	0.520751	1.72584	0.00609756	0.0699173	0.93	7242	tags=55%, list=23%, signal=71%
GO_TRANSMEMBRANE_RECEPTOR_PROTEIN_PHOSPHATASE_ACTIVITY	GO_TRANSMEMBRANE_RECEPTOR_PROTEIN_PHOSPHATASE_ACTIVITY		17	0.595338	1.72518	0.00788955	0.0701917	0.93	4671	tags=53%, list=15%, signal=62%
GO_OXIDOREDUCTASE_ACTIVITY_OXIDIZING_METAL_IONS	GO_OXIDOREDUCTASE_ACTIVITY_OXIDIZING_METAL_IONS		17	0.598046	1.72509	0.0131004	0.0701269	0.93	9367	tags=71%, list=29%, signal=100%
GO_CLATHRIN_COAT_OF_COATED_PIT	GO_CLATHRIN_COAT_OF_COATED_PIT		16	0.597621	1.72482	0.0121212	0.0701657	0.93	4073	tags=38%, list=13%, signal=43%
GO_CELLULAR_GLUCOSE_HOMEOSTASIS	GO_CELLULAR_GLUCOSE_HOMEOSTASIS		70	0.43192	1.72478	0.00612245	0.0700912	0.93	4861	tags=34%, list=15%, signal=40%
GO_VESICLE_ORGANIZATION	GO_VESICLE_ORGANIZATION		264	0.399182	1.7245	0.0040404	0.0701078	0.93	6477	tags=41%, list=20%, signal=51%
GO_STRIATED_MUSCLE_CELL_DIFFERENTIATION	GO_STRIATED_MUSCLE_CELL_DIFFERENTIATION		159	0.417513	1.72438	0.00425532	0.0700645	0.932	4626	tags=34%, list=15%, signal=40%
GO_ESTABLISHMENT_OF_TISSUE_POLARITY	GO_ESTABLISHMENT_OF_TISSUE_POLARITY		17	0.597077	1.72431	0.0212355	0.069986	0.932	4135	tags=47%, list=13%, signal=54%
GO_EPITHELIAL_CELL_DIFFERENTIATION	GO_EPITHELIAL_CELL_DIFFERENTIATION		455	0.364458	1.72401	0	0.0700791	0.932	4687	tags=26%, list=15%, signal=30%
GO_REGULATION_OF_DOUBLE_STRAND_BREAK_REPAIR	GO_REGULATION_OF_DOUBLE_STRAND_BREAK_REPAIR		34	0.540386	1.72398	0.00814664	0.0699818	0.932	4774	tags=47%, list=15%, signal=55%
GO_CELL_CELL_ADHERENS_JUNCTION	GO_CELL_CELL_ADHERENS_JUNCTION		50	0.481808	1.7238	0.0106383	0.0699855	0.932	5245	tags=40%, list=17%, signal=48%
GO_SULFUR_COMPOUND_CATABOLIC_PROCESS	GO_SULFUR_COMPOUND_CATABOLIC_PROCESS		39	0.528093	1.72369	0.0210526	0.0699464	0.932	4936	tags=46%, list=16%, signal=55%
GO_POSITIVE_REGULATION_OF_SMOOTH_MUSCLE_CELL_MIGRATION	GO_POSITIVE_REGULATION_OF_SMOOTH_MUSCLE_CELL_MIGRATION		30	0.57452	1.72309	0.0261569	0.0701499	0.932	5024	tags=47%, list=16%, signal=55%
GO_POSITIVE_REGULATION_OF_EXTRINSIC_APOPTOTIC_SIGNALING_PATHWAY_VIA_DEATH_DOMAIN_RECEPTORS	GO_POSITIVE_REGULATION_OF_EXTRINSIC_APOPTOTIC_SIGNALING_PATHWAY_VIA_DEATH_DOMAIN_RECEPTORS		16	0.658528	1.72281	0.0100604	0.0702134	0.932	6652	tags=75%, list=21%, signal=95%
GO_REGULATION_OF_CHEMOKINE_PRODUCTION	GO_REGULATION_OF_CHEMOKINE_PRODUCTION		63	0.471119	1.72225	0.0162602	0.0704384	0.934	4652	tags=37%, list=15%, signal=43%
GO_CYSTEINE_TYPE_ENDOPEPTIDASE_ACTIVITY	GO_CYSTEINE_TYPE_ENDOPEPTIDASE_ACTIVITY		81	0.432048	1.72217	0.00816326	0.0703977	0.935	4989	tags=36%, list=16%, signal=42%
GO_PATTERN_SPECIFICATION_PROCESS	GO_PATTERN_SPECIFICATION_PROCESS		394	0.365853	1.7221	0	0.0703444	0.936	5407	tags=29%, list=17%, signal=35%
GO_NOTOCHORD_DEVELOPMENT	GO_NOTOCHORD_DEVELOPMENT		17	0.604103	1.72154	0.00423729	0.0705908	0.936	5323	tags=59%, list=17%, signal=71%
GO_REGULATION_OF_AUTOPHAGY	GO_REGULATION_OF_AUTOPHAGY		243	0.388624	1.72124	0.00200803	0.0706591	0.937	7654	tags=43%, list=24%, signal=56%
GO_PROTEIN_TYROSINE_KINASE_BINDING	GO_PROTEIN_TYROSINE_KINASE_BINDING		52	0.455558	1.72077	0.0159363	0.0708249	0.937	3768	tags=33%, list=12%, signal=37%
GO_ERBB2_SIGNALING_PATHWAY	GO_ERBB2_SIGNALING_PATHWAY		38	0.512293	1.72052	0.0169133	0.0708752	0.937	4378	tags=37%, list=14%, signal=43%
GO_VESICLE_MEMBRANE	GO_VESICLE_MEMBRANE		489	0.376163	1.72043	0.00204082	0.0708331	0.937	5496	tags=33%, list=17%, signal=39%
GO_NEGATIVE_REGULATION_OF_ACTIN_FILAMENT_POLYMERIZATION	GO_NEGATIVE_REGULATION_OF_ACTIN_FILAMENT_POLYMERIZATION		41	0.470836	1.72034	0.00792079	0.0707886	0.937	6332	tags=41%, list=20%, signal=52%
GO_REGULATION_OF_SUBSTRATE_ADHESION_DEPENDENT_CELL_SPREADING	GO_REGULATION_OF_SUBSTRATE_ADHESION_DEPENDENT_CELL_SPREADING		40	0.52017	1.72028	0.00639659	0.0707279	0.937	6332	tags=48%, list=20%, signal=59%
GO_RETINA_VASCULATURE_DEVELOPMENT_IN_CAMERA_TYPE_EYE	GO_RETINA_VASCULATURE_DEVELOPMENT_IN_CAMERA_TYPE_EYE		16	0.738434	1.71983	0.0214425	0.070899	0.937	3241	tags=50%, list=10%, signal=56%
GO_CEREBRAL_CORTEX_RADIAL_GLIA_GUIDED_MIGRATION	GO_CEREBRAL_CORTEX_RADIAL_GLIA_GUIDED_MIGRATION		18	0.613923	1.71955	0.0240964	0.0709797	0.937	4135	tags=39%, list=13%, signal=45%
GO_TELENCEPHALON_GLIAL_CELL_MIGRATION	GO_TELENCEPHALON_GLIAL_CELL_MIGRATION		18	0.613923	1.71955	0.0240964	0.0708765	0.937	4135	tags=39%, list=13%, signal=45%
GO_MYELIN_SHEATH	GO_MYELIN_SHEATH		162	0.475678	1.71947	0.0040404	0.0708358	0.937	6060	tags=40%, list=19%, signal=49%
GO_ACTIVIN_RECEPTOR_SIGNALING_PATHWAY	GO_ACTIVIN_RECEPTOR_SIGNALING_PATHWAY		20	0.549372	1.71887	0.0165631	0.0710917	0.937	1268	tags=30%, list=4%, signal=31%
GO_ENDOCYTIC_VESICLE	GO_ENDOCYTIC_VESICLE		250	0.415227	1.71879	0.0102459	0.0710462	0.937	7086	tags=42%, list=22%, signal=54%
GO_EPITHELIAL_CELL_DIFFERENTIATION_INVOLVED_IN_KIDNEY_DEVELOPMENT	GO_EPITHELIAL_CELL_DIFFERENTIATION_INVOLVED_IN_KIDNEY_DEVELOPMENT		24	0.560445	1.71853	0.0330097	0.0711115	0.938	4231	tags=33%, list=13%, signal=38%
GO_CELL_CYCLE_G1_S_PHASE_TRANSITION	GO_CELL_CYCLE_G1_S_PHASE_TRANSITION		108	0.527595	1.71825	0.0593047	0.0711872	0.938	5997	tags=51%, list=19%, signal=63%
GO_G1_S_TRANSITION_OF_MITOTIC_CELL_CYCLE	GO_G1_S_TRANSITION_OF_MITOTIC_CELL_CYCLE		108	0.527595	1.71825	0.0593047	0.0710847	0.938	5997	tags=51%, list=19%, signal=63%
GO_CELL_CYCLE_G2_M_PHASE_TRANSITION	GO_CELL_CYCLE_G2_M_PHASE_TRANSITION		134	0.450233	1.71802	0.0304878	0.0711058	0.938	6232	tags=46%, list=20%, signal=57%
GO_POSITIVE_REGULATION_OF_ORGANELLE_ASSEMBLY	GO_POSITIVE_REGULATION_OF_ORGANELLE_ASSEMBLY		42	0.480396	1.71798	0.00833333	0.0710286	0.938	1816	tags=26%, list=6%, signal=28%
GO_PROTEIN_O_LINKED_GLYCOSYLATION	GO_PROTEIN_O_LINKED_GLYCOSYLATION		92	0.44223	1.71791	0.002079	0.0709538	0.938	7206	tags=46%, list=23%, signal=59%
GO_REGULATION_OF_DNA_DAMAGE_RESPONSE_SIGNAL_TRANSDUCTION_BY_P53_CLASS_MEDIATOR	GO_REGULATION_OF_DNA_DAMAGE_RESPONSE_SIGNAL_TRANSDUCTION_BY_P53_CLASS_MEDIATOR		27	0.561145	1.71764	0.0180361	0.0710167	0.938	8945	tags=67%, list=28%, signal=93%
GO_UBIQUITIN_LIKE_PROTEIN_BINDING	GO_UBIQUITIN_LIKE_PROTEIN_BINDING		116	0.451181	1.71758	0.00636943	0.0709377	0.938	4201	tags=32%, list=13%, signal=37%
GO_POSITIVE_REGULATION_OF_BIOMINERAL_TISSUE_DEVELOPMENT	GO_POSITIVE_REGULATION_OF_BIOMINERAL_TISSUE_DEVELOPMENT		36	0.521606	1.71718	0.0102041	0.0710464	0.938	5677	tags=36%, list=18%, signal=44%
GO_ESTABLISHMENT_OF_CELL_POLARITY	GO_ESTABLISHMENT_OF_CELL_POLARITY		85	0.435673	1.71709	0.0102669	0.0709826	0.938	4243	tags=29%, list=13%, signal=34%
GO_LYSOSOMAL_TRANSPORT	GO_LYSOSOMAL_TRANSPORT		66	0.465576	1.71641	0.0194805	0.0712486	0.938	3372	tags=38%, list=11%, signal=42%
GO_TELENCEPHALON_DEVELOPMENT	GO_TELENCEPHALON_DEVELOPMENT		223	0.400286	1.71562	0.00816326	0.0716031	0.938	5483	tags=33%, list=17%, signal=40%
GO_KIDNEY_VASCULATURE_DEVELOPMENT	GO_KIDNEY_VASCULATURE_DEVELOPMENT		19	0.699048	1.71547	0.03	0.0715794	0.939	4813	tags=53%, list=15%, signal=62%
GO_RENAL_SYSTEM_VASCULATURE_DEVELOPMENT	GO_RENAL_SYSTEM_VASCULATURE_DEVELOPMENT		19	0.699048	1.71547	0.03	0.0714778	0.939	4813	tags=53%, list=15%, signal=62%
GO_PLATELET_ACTIVATION	GO_PLATELET_ACTIVATION		140	0.4394	1.71535	0.00831601	0.0714341	0.939	3365	tags=27%, list=11%, signal=30%
GO_REGULATION_OF_PROTEIN_CATABOLIC_PROCESS	GO_REGULATION_OF_PROTEIN_CATABOLIC_PROCESS		378	0.407889	1.71533	0.00208768	0.0713453	0.939	4669	tags=32%, list=15%, signal=37%
GO_PHOSPHOLIPID_TRANSLOCATING_ATPASE_ACTIVITY	GO_PHOSPHOLIPID_TRANSLOCATING_ATPASE_ACTIVITY		16	0.654058	1.71507	0.00792079	0.07141	0.94	6387	tags=63%, list=20%, signal=78%
GO_REGULATION_OF_ENDOTHELIAL_CELL_MIGRATION	GO_REGULATION_OF_ENDOTHELIAL_CELL_MIGRATION		107	0.436274	1.71499	0.00618557	0.0713712	0.94	4464	tags=33%, list=14%, signal=38%
GO_ENDOCARDIAL_CUSHION_MORPHOGENESIS	GO_ENDOCARDIAL_CUSHION_MORPHOGENESIS		22	0.561301	1.71485	0.01002	0.0713647	0.94	5000	tags=41%, list=16%, signal=49%
GO_ACTIVATION_OF_GTPASE_ACTIVITY	GO_ACTIVATION_OF_GTPASE_ACTIVITY		71	0.413628	1.71481	0.00639659	0.0712992	0.94	4257	tags=30%, list=13%, signal=34%
GO_SALIVARY_GLAND_DEVELOPMENT	GO_SALIVARY_GLAND_DEVELOPMENT		31	0.534736	1.7148	0.0140281	0.0711991	0.94	4100	tags=42%, list=13%, signal=48%
GO_CARDIOCYTE_DIFFERENTIATION	GO_CARDIOCYTE_DIFFERENTIATION		91	0.4244	1.71458	0.00426439	0.071246	0.94	3264	tags=29%, list=10%, signal=32%
GO_NEGATIVE_REGULATION_OF_PHOSPHORYLATION	GO_NEGATIVE_REGULATION_OF_PHOSPHORYLATION		407	0.351931	1.71457	0	0.0711463	0.94	5585	tags=31%, list=18%, signal=37%
GO_TRANS_GOLGI_NETWORK	GO_TRANS_GOLGI_NETWORK		179	0.407614	1.71436	0.01002	0.0711777	0.94	5797	tags=37%, list=18%, signal=46%
GO_NEGATIVE_REGULATION_OF_MYELOID_LEUKOCYTE_DIFFERENTIATION	GO_NEGATIVE_REGULATION_OF_MYELOID_LEUKOCYTE_DIFFERENTIATION		43	0.472247	1.71412	0.0117878	0.0712028	0.94	3358	tags=28%, list=11%, signal=31%
GO_SPINDLE_MIDZONE	GO_SPINDLE_MIDZONE		25	0.644867	1.71382	0.0476191	0.0712887	0.94	4552	tags=60%, list=14%, signal=70%
GO_ENDOTHELIAL_CELL_MIGRATION	GO_ENDOTHELIAL_CELL_MIGRATION		55	0.484297	1.7138	0.00603622	0.0712062	0.94	3400	tags=33%, list=11%, signal=37%
GO_DYNEIN_BINDING	GO_DYNEIN_BINDING		25	0.563262	1.71376	0.0223124	0.0711385	0.94	4388	tags=48%, list=14%, signal=56%
GO_MITOTIC_NUCLEAR_DIVISION	GO_MITOTIC_NUCLEAR_DIVISION		339	0.475453	1.71344	0.0627615	0.0712495	0.941	6039	tags=51%, list=19%, signal=62%
GO_REGULATION_OF_DNA_REPAIR	GO_REGULATION_OF_DNA_REPAIR		70	0.4767	1.71272	0.0201613	0.0715099	0.942	4774	tags=41%, list=15%, signal=49%
GO_POSITIVE_REGULATION_OF_DNA_TEMPLATED_TRANSCRIPTION_INITIATION	GO_POSITIVE_REGULATION_OF_DNA_TEMPLATED_TRANSCRIPTION_INITIATION		24	0.5377	1.71254	0.012685	0.0715246	0.942	2986	tags=33%, list=9%, signal=37%
GO_POSITIVE_REGULATION_OF_INTRACELLULAR_PROTEIN_TRANSPORT	GO_POSITIVE_REGULATION_OF_INTRACELLULAR_PROTEIN_TRANSPORT		234	0.364268	1.71253	0	0.0714299	0.942	6428	tags=35%, list=20%, signal=44%
GO_ATPASE_ACTIVITY	GO_ATPASE_ACTIVITY		418	0.383836	1.71248	0.0124224	0.0713666	0.942	5414	tags=37%, list=17%, signal=44%
GO_NEGATIVE_REGULATION_OF_CELL_MORPHOGENESIS_INVOLVED_IN_DIFFERENTIATION	GO_NEGATIVE_REGULATION_OF_CELL_MORPHOGENESIS_INVOLVED_IN_DIFFERENTIATION		113	0.410334	1.71196	0.00406504	0.071566	0.943	4414	tags=31%, list=14%, signal=36%
GO_CELL_CYCLE_CHECKPOINT	GO_CELL_CYCLE_CHECKPOINT		180	0.461571	1.71165	0.058	0.0716111	0.943	6415	tags=47%, list=20%, signal=59%
GO_NEGATIVE_REGULATION_OF_MITOTIC_NUCLEAR_DIVISION	GO_NEGATIVE_REGULATION_OF_MITOTIC_NUCLEAR_DIVISION		32	0.568363	1.71147	0.0497018	0.0716002	0.943	6768	tags=50%, list=21%, signal=63%
GO_REGULATION_OF_MULTICELLULAR_ORGANISM_GROWTH	GO_REGULATION_OF_MULTICELLULAR_ORGANISM_GROWTH		62	0.461556	1.71072	0.011976	0.0720023	0.943	5341	tags=34%, list=17%, signal=41%
GO_CELLULAR_RESPONSE_TO_RETINOIC_ACID	GO_CELLULAR_RESPONSE_TO_RETINOIC_ACID		60	0.44454	1.71059	0	0.0719531	0.943	3837	tags=30%, list=12%, signal=34%
GO_RESPONSE_TO_DSRNA	GO_RESPONSE_TO_DSRNA		52	0.483765	1.70984	0.016129	0.0722798	0.945	3839	tags=37%, list=12%, signal=41%
GO_RECEPTOR_MEDIATED_ENDOCYTOSIS	GO_RECEPTOR_MEDIATED_ENDOCYTOSIS		218	0.410917	1.70884	0.00409836	0.0727528	0.946	5583	tags=32%, list=18%, signal=38%
GO_DNA_DEPENDENT_ATPASE_ACTIVITY	GO_DNA_DEPENDENT_ATPASE_ACTIVITY		77	0.520478	1.70854	0.0600414	0.0728137	0.946	5687	tags=49%, list=18%, signal=60%
GO_MYELIN_ASSEMBLY	GO_MYELIN_ASSEMBLY		15	0.593642	1.70852	0.0165975	0.0727224	0.946	3385	tags=40%, list=11%, signal=45%
GO_NEGATIVE_REGULATION_OF_CHROMOSOME_SEGREGATION	GO_NEGATIVE_REGULATION_OF_CHROMOSOME_SEGREGATION		25	0.615398	1.70825	0.0465587	0.072749	0.946	6768	tags=52%, list=21%, signal=66%
GO_POSITIVE_REGULATION_OF_CELL_MATRIX_ADHESION	GO_POSITIVE_REGULATION_OF_CELL_MATRIX_ADHESION		40	0.479434	1.70822	0.00835073	0.0726636	0.946	4464	tags=33%, list=14%, signal=38%
GO_CHONDROITIN_SULFATE_PROTEOGLYCAN_BIOSYNTHETIC_PROCESS	GO_CHONDROITIN_SULFATE_PROTEOGLYCAN_BIOSYNTHETIC_PROCESS		29	0.593921	1.70807	0.0333333	0.0726471	0.946	4188	tags=48%, list=13%, signal=56%
GO_NEGATIVE_REGULATION_OF_MEIOTIC_CELL_CYCLE	GO_NEGATIVE_REGULATION_OF_MEIOTIC_CELL_CYCLE		17	0.571987	1.70796	0.0201613	0.0726156	0.946	5187	tags=35%, list=16%, signal=42%
GO_ANTERIOR_POSTERIOR_PATTERN_SPECIFICATION	GO_ANTERIOR_POSTERIOR_PATTERN_SPECIFICATION		184	0.396234	1.70793	0.00604839	0.0725363	0.946	7153	tags=39%, list=23%, signal=50%
GO_CELLULAR_RESPONSE_TO_LIGHT_STIMULUS	GO_CELLULAR_RESPONSE_TO_LIGHT_STIMULUS		85	0.417331	1.70776	0.0140845	0.0725283	0.946	5367	tags=40%, list=17%, signal=48%
GO_REGULATION_OF_MEMBRANE_PROTEIN_ECTODOMAIN_PROTEOLYSIS	GO_REGULATION_OF_MEMBRANE_PROTEIN_ECTODOMAIN_PROTEOLYSIS		20	0.563808	1.7076	0.00819672	0.072505	0.946	1860	tags=25%, list=6%, signal=27%
GO_RESPONSE_TO_OXYGEN_LEVELS	GO_RESPONSE_TO_OXYGEN_LEVELS		303	0.373434	1.70758	0	0.0724265	0.946	5248	tags=30%, list=17%, signal=36%
GO_NEGATIVE_REGULATION_OF_NEURON_DIFFERENTIATION	GO_NEGATIVE_REGULATION_OF_NEURON_DIFFERENTIATION		183	0.40129	1.70669	0.0020284	0.0728325	0.946	4528	tags=27%, list=14%, signal=32%
GO_PROTEIN_MODIFICATION_BY_SMALL_PROTEIN_REMOVAL	GO_PROTEIN_MODIFICATION_BY_SMALL_PROTEIN_REMOVAL		108	0.436384	1.70608	0.022541	0.0730891	0.946	4291	tags=36%, list=14%, signal=42%
GO_REGULATION_OF_NFAT_PROTEIN_IMPORT_INTO_NUCLEUS	GO_REGULATION_OF_NFAT_PROTEIN_IMPORT_INTO_NUCLEUS		16	0.5869	1.70603	0.0164948	0.0730183	0.946	2456	tags=31%, list=8%, signal=34%
GO_POSITIVE_REGULATION_OF_PEPTIDYL_SERINE_PHOSPHORYLATION	GO_POSITIVE_REGULATION_OF_PEPTIDYL_SERINE_PHOSPHORYLATION		71	0.442029	1.705	0.0020284	0.0735329	0.947	4413	tags=30%, list=14%, signal=34%
GO_PROTEIN_KINASE_A_BINDING	GO_PROTEIN_KINASE_A_BINDING		40	0.486054	1.70485	0.0126582	0.0735554	0.948	3320	tags=33%, list=10%, signal=36%
GO_N_ACETYLGLUCOSAMINE_METABOLIC_PROCESS	GO_N_ACETYLGLUCOSAMINE_METABOLIC_PROCESS		15	0.590678	1.70478	0.0184426	0.0734911	0.948	6316	tags=53%, list=20%, signal=67%
GO_ENDOTHELIAL_CELL_DEVELOPMENT	GO_ENDOTHELIAL_CELL_DEVELOPMENT		44	0.504387	1.7047	0.0118577	0.0734353	0.948	3946	tags=32%, list=12%, signal=36%
GO_REGULATION_OF_VASCULAR_ENDOTHELIAL_GROWTH_FACTOR_PRODUCTION	GO_REGULATION_OF_VASCULAR_ENDOTHELIAL_GROWTH_FACTOR_PRODUCTION		31	0.550992	1.70463	0.0269151	0.0733659	0.948	5906	tags=48%, list=19%, signal=59%
GO_TAXIS	GO_TAXIS		433	0.389706	1.70457	0.00203252	0.0733138	0.948	7731	tags=39%, list=24%, signal=51%
GO_REGULATION_OF_CELL_GROWTH	GO_REGULATION_OF_CELL_GROWTH		375	0.356945	1.70427	0	0.073349	0.948	6106	tags=33%, list=19%, signal=40%
GO_NUCLEAR_ENVELOPE	GO_NUCLEAR_ENVELOPE		385	0.390795	1.70425	0.00630252	0.0732643	0.948	4976	tags=31%, list=16%, signal=37%
GO_APICOLATERAL_PLASMA_MEMBRANE	GO_APICOLATERAL_PLASMA_MEMBRANE		15	0.606651	1.70414	0.0161943	0.0732192	0.948	1731	tags=27%, list=5%, signal=28%
GO_POSITIVE_REGULATION_OF_FAT_CELL_DIFFERENTIATION	GO_POSITIVE_REGULATION_OF_FAT_CELL_DIFFERENTIATION		44	0.479385	1.70346	0.0114504	0.0735091	0.949	8792	tags=50%, list=28%, signal=69%
GO_PROTEIN_TRIMERIZATION	GO_PROTEIN_TRIMERIZATION		38	0.508459	1.70334	0.0161943	0.0734764	0.949	4372	tags=37%, list=14%, signal=43%
GO_PROTEIN_TRANSPORTER_ACTIVITY	GO_PROTEIN_TRANSPORTER_ACTIVITY		96	0.450908	1.70299	0.0103734	0.0735707	0.949	4003	tags=33%, list=13%, signal=38%
GO_FC_RECEPTOR_SIGNALING_PATHWAY	GO_FC_RECEPTOR_SIGNALING_PATHWAY		202	0.454957	1.70224	0.0194175	0.0739056	0.949	5478	tags=35%, list=17%, signal=42%
GO_CENTRAL_NERVOUS_SYSTEM_PROJECTION_NEURON_AXONOGENESIS	GO_CENTRAL_NERVOUS_SYSTEM_PROJECTION_NEURON_AXONOGENESIS		22	0.585804	1.70223	0.0159681	0.0738197	0.949	4135	tags=41%, list=13%, signal=47%
GO_LOCALIZATION_WITHIN_MEMBRANE	GO_LOCALIZATION_WITHIN_MEMBRANE		120	0.420304	1.7022	0.010142	0.0737375	0.949	4975	tags=33%, list=16%, signal=38%
GO_REGULATION_OF_VESICLE_MEDIATED_TRANSPORT	GO_REGULATION_OF_VESICLE_MEDIATED_TRANSPORT		446	0.362914	1.70044	0.00205761	0.0746014	0.951	4726	tags=28%, list=15%, signal=32%
GO_ESTABLISHMENT_OF_SPINDLE_ORIENTATION	GO_ESTABLISHMENT_OF_SPINDLE_ORIENTATION		24	0.548706	1.70039	0.0187891	0.0745418	0.951	4135	tags=42%, list=13%, signal=48%
GO_CELL_PROJECTION_ASSEMBLY	GO_CELL_PROJECTION_ASSEMBLY		241	0.407754	1.70033	0.0238569	0.0744771	0.951	6105	tags=38%, list=19%, signal=46%
GO_NEUROBLAST_PROLIFERATION	GO_NEUROBLAST_PROLIFERATION		29	0.533941	1.69996	0.00613497	0.0746208	0.951	7475	tags=55%, list=24%, signal=72%
GO_COPI_COATED_VESICLE	GO_COPI_COATED_VESICLE		22	0.634372	1.69966	0.0240481	0.0746849	0.951	3468	tags=45%, list=11%, signal=51%
GO_WNT_ACTIVATED_RECEPTOR_ACTIVITY	GO_WNT_ACTIVATED_RECEPTOR_ACTIVITY		22	0.562531	1.69961	0.0241449	0.0746319	0.951	4392	tags=45%, list=14%, signal=53%
GO_CONTRACTILE_FIBER	GO_CONTRACTILE_FIBER		201	0.43566	1.69869	0.0264228	0.0750929	0.953	6708	tags=42%, list=21%, signal=53%
GO_NUCLEAR_CHROMOSOME_TELOMERIC_REGION	GO_NUCLEAR_CHROMOSOME_TELOMERIC_REGION		116	0.484511	1.69858	0.0407332	0.0750473	0.953	5798	tags=44%, list=18%, signal=54%
GO_SPHINGOLIPID_METABOLIC_PROCESS	GO_SPHINGOLIPID_METABOLIC_PROCESS		129	0.411589	1.69852	0.0102881	0.0749827	0.953	7206	tags=47%, list=23%, signal=61%
GO_POSITIVE_REGULATION_OF_MUSCLE_TISSUE_DEVELOPMENT	GO_POSITIVE_REGULATION_OF_MUSCLE_TISSUE_DEVELOPMENT		51	0.451408	1.69763	0.00208768	0.0753296	0.953	8311	tags=53%, list=26%, signal=72%
GO_RESPONSE_TO_EPIDERMAL_GROWTH_FACTOR	GO_RESPONSE_TO_EPIDERMAL_GROWTH_FACTOR		28	0.528199	1.69748	0.0127389	0.0753113	0.953	3703	tags=36%, list=12%, signal=40%
GO_SISTER_CHROMATID_SEGREGATION	GO_SISTER_CHROMATID_SEGREGATION		162	0.535181	1.69646	0.0767635	0.07591	0.953	6042	tags=57%, list=19%, signal=71%
GO_ER_TO_GOLGI_VESICLE_MEDIATED_TRANSPORT	GO_ER_TO_GOLGI_VESICLE_MEDIATED_TRANSPORT		161	0.477682	1.69621	0.024948	0.0759539	0.954	5129	tags=40%, list=16%, signal=47%
GO_CORECEPTOR_ACTIVITY	GO_CORECEPTOR_ACTIVITY		35	0.61108	1.69598	0.032	0.0759652	0.954	5465	tags=46%, list=17%, signal=55%
GO_OLIGOSACCHARIDE_METABOLIC_PROCESS	GO_OLIGOSACCHARIDE_METABOLIC_PROCESS		61	0.458733	1.6958	0.0207469	0.0759713	0.954	7206	tags=44%, list=23%, signal=57%
GO_NEGATIVE_REGULATION_OF_CHROMOSOME_ORGANIZATION	GO_NEGATIVE_REGULATION_OF_CHROMOSOME_ORGANIZATION		93	0.473123	1.69528	0.034413	0.0761901	0.956	3925	tags=32%, list=12%, signal=37%
GO_MUSCLE_CELL_PROLIFERATION	GO_MUSCLE_CELL_PROLIFERATION		17	0.617332	1.69523	0.022541	0.0761249	0.956	5394	tags=47%, list=17%, signal=57%
GO_RENAL_TUBULE_DEVELOPMENT	GO_RENAL_TUBULE_DEVELOPMENT		78	0.407826	1.69466	0.00396825	0.0763311	0.956	5353	tags=32%, list=17%, signal=38%
GO_NEGATIVE_REGULATION_OF_CELL_DIVISION	GO_NEGATIVE_REGULATION_OF_CELL_DIVISION		56	0.516823	1.69443	0.0705645	0.0763707	0.956	5364	tags=38%, list=17%, signal=45%
GO_PLATELET_DEGRANULATION	GO_PLATELET_DEGRANULATION		104	0.454115	1.69434	0.0163265	0.0763168	0.956	4385	tags=32%, list=14%, signal=37%
GO_ANDROGEN_RECEPTOR_BINDING	GO_ANDROGEN_RECEPTOR_BINDING		39	0.488019	1.69401	0.0119284	0.076434	0.956	4822	tags=41%, list=15%, signal=48%
GO_REGULATION_OF_DEVELOPMENTAL_GROWTH	GO_REGULATION_OF_DEVELOPMENTAL_GROWTH		277	0.382775	1.6935	0.00604839	0.0766651	0.957	7315	tags=39%, list=23%, signal=50%
GO_LYMPH_VESSEL_DEVELOPMENT	GO_LYMPH_VESSEL_DEVELOPMENT		20	0.563859	1.69333	0.0155642	0.0766436	0.957	1775	tags=30%, list=6%, signal=32%
GO_NEGATIVE_REGULATION_OF_STAT_CASCADE	GO_NEGATIVE_REGULATION_OF_STAT_CASCADE		43	0.48122	1.69283	0.00988142	0.0768581	0.957	2347	tags=26%, list=7%, signal=28%
GO_NEGATIVE_REGULATION_OF_JAK_STAT_CASCADE	GO_NEGATIVE_REGULATION_OF_JAK_STAT_CASCADE		43	0.48122	1.69282	0.00988142	0.0767601	0.957	2347	tags=26%, list=7%, signal=28%
GO_MODULATION_BY_HOST_OF_VIRAL_PROCESS	GO_MODULATION_BY_HOST_OF_VIRAL_PROCESS		18	0.547107	1.69275	0.021611	0.0767053	0.957	3660	tags=39%, list=12%, signal=44%
GO_NOSE_DEVELOPMENT	GO_NOSE_DEVELOPMENT		15	0.5976	1.69252	0.01417	0.0767232	0.957	4786	tags=47%, list=15%, signal=55%
GO_SARCOLEMMA	GO_SARCOLEMMA		123	0.437858	1.6923	0.0163599	0.0767669	0.957	5677	tags=37%, list=18%, signal=44%
GO_RESPONSE_TO_ACID_CHEMICAL	GO_RESPONSE_TO_ACID_CHEMICAL		303	0.362887	1.69222	0	0.0767066	0.957	7221	tags=36%, list=23%, signal=47%
GO_POSITIVE_REGULATION_OF_PROTEIN_CATABOLIC_PROCESS	GO_POSITIVE_REGULATION_OF_PROTEIN_CATABOLIC_PROCESS		254	0.411011	1.69213	0.00817996	0.0766925	0.957	4669	tags=33%, list=15%, signal=38%
GO_CELL_MORPHOGENESIS_INVOLVED_IN_NEURON_DIFFERENTIATION	GO_CELL_MORPHOGENESIS_INVOLVED_IN_NEURON_DIFFERENTIATION		352	0.408776	1.6914	0.00608519	0.07709	0.957	6199	tags=35%, list=20%, signal=43%
GO_ENDOTHELIAL_CELL_DIFFERENTIATION	GO_ENDOTHELIAL_CELL_DIFFERENTIATION		70	0.468458	1.69116	0.012024	0.0771449	0.957	5522	tags=34%, list=17%, signal=41%
GO_AXIS_SPECIFICATION	GO_AXIS_SPECIFICATION		87	0.409858	1.69063	0.0039604	0.0774037	0.957	6948	tags=41%, list=22%, signal=53%
GO_EMBRYONIC_HEART_TUBE_MORPHOGENESIS	GO_EMBRYONIC_HEART_TUBE_MORPHOGENESIS		59	0.426735	1.6897	0.00421053	0.0778515	0.958	5575	tags=39%, list=18%, signal=47%
GO_ASYMMETRIC_PROTEIN_LOCALIZATION	GO_ASYMMETRIC_PROTEIN_LOCALIZATION		18	0.570441	1.68931	0.0160643	0.0780016	0.958	3607	tags=50%, list=11%, signal=56%
GO_POSITIVE_REGULATION_OF_ACTIN_NUCLEATION	GO_POSITIVE_REGULATION_OF_ACTIN_NUCLEATION		16	0.570762	1.68887	0.0124224	0.0781874	0.958	5495	tags=50%, list=17%, signal=60%
GO_REGULATION_OF_CENTROSOME_DUPLICATION	GO_REGULATION_OF_CENTROSOME_DUPLICATION		31	0.553665	1.68861	0.025974	0.078289	0.958	3311	tags=45%, list=10%, signal=50%
GO_REGULATION_OF_PEPTIDYL_THREONINE_PHOSPHORYLATION	GO_REGULATION_OF_PEPTIDYL_THREONINE_PHOSPHORYLATION		35	0.480611	1.68832	0.014	0.0783681	0.958	6232	tags=46%, list=20%, signal=57%
GO_POSITIVE_REGULATION_OF_KINASE_ACTIVITY	GO_POSITIVE_REGULATION_OF_KINASE_ACTIVITY		461	0.356238	1.68797	0.00399202	0.0784588	0.958	5100	tags=30%, list=16%, signal=35%
GO_LABYRINTHINE_LAYER_DEVELOPMENT	GO_LABYRINTHINE_LAYER_DEVELOPMENT		43	0.49425	1.68779	0.0121212	0.0784557	0.958	8386	tags=58%, list=26%, signal=79%
GO_N_GLYCAN_PROCESSING	GO_N_GLYCAN_PROCESSING		19	0.566421	1.68727	0.014	0.078655	0.958	1331	tags=26%, list=4%, signal=27%
GO_ANTIGEN_PROCESSING_AND_PRESENTATION	GO_ANTIGEN_PROCESSING_AND_PRESENTATION		205	0.461074	1.68712	0.03125	0.0786667	0.959	5726	tags=39%, list=18%, signal=47%
GO_REGULATION_OF_EXTRACELLULAR_MATRIX_ORGANIZATION	GO_REGULATION_OF_EXTRACELLULAR_MATRIX_ORGANIZATION		26	0.505815	1.68689	0.0181818	0.0787166	0.96	7184	tags=50%, list=23%, signal=65%
GO_DNA_INTEGRITY_CHECKPOINT	GO_DNA_INTEGRITY_CHECKPOINT		137	0.451875	1.68677	0.0552147	0.0786867	0.96	6562	tags=49%, list=21%, signal=61%
GO_ENDOTHELIUM_DEVELOPMENT	GO_ENDOTHELIUM_DEVELOPMENT		88	0.449799	1.68667	0.0234375	0.0786482	0.96	4829	tags=32%, list=15%, signal=37%
GO_ACTIN_FILAMENT_BASED_MOVEMENT	GO_ACTIN_FILAMENT_BASED_MOVEMENT		90	0.422403	1.68636	0.010142	0.0787228	0.96	4575	tags=34%, list=14%, signal=40%
GO_EARLY_ENDOSOME_MEMBRANE	GO_EARLY_ENDOSOME_MEMBRANE		107	0.425359	1.68616	0.0123457	0.0787338	0.96	7044	tags=42%, list=22%, signal=54%
GO_NEGATIVE_REGULATION_OF_JNK_CASCADE	GO_NEGATIVE_REGULATION_OF_JNK_CASCADE		33	0.498552	1.6861	0.0225873	0.0786613	0.96	5950	tags=42%, list=19%, signal=52%
GO_SH3_DOMAIN_BINDING	GO_SH3_DOMAIN_BINDING		113	0.406334	1.68573	0.0102459	0.0787574	0.96	5701	tags=38%, list=18%, signal=46%
GO_NUCLEOBASE_METABOLIC_PROCESS	GO_NUCLEOBASE_METABOLIC_PROCESS		38	0.508085	1.68571	0.0285714	0.0786743	0.96	5648	tags=37%, list=18%, signal=45%
GO_ESTABLISHMENT_OF_EPITHELIAL_CELL_POLARITY	GO_ESTABLISHMENT_OF_EPITHELIAL_CELL_POLARITY		22	0.540534	1.68571	0.0227743	0.0785801	0.96	6049	tags=50%, list=19%, signal=62%
GO_SULFURIC_ESTER_HYDROLASE_ACTIVITY	GO_SULFURIC_ESTER_HYDROLASE_ACTIVITY		17	0.609919	1.68519	0.0229645	0.0788019	0.96	4203	tags=53%, list=13%, signal=61%
GO_TISSUE_REMODELING	GO_TISSUE_REMODELING		85	0.470801	1.68495	0.0164948	0.0788767	0.96	5246	tags=35%, list=17%, signal=42%
GO_PHOSPHATIDYLINOSITOL_3_KINASE_BINDING	GO_PHOSPHATIDYLINOSITOL_3_KINASE_BINDING		29	0.488084	1.68488	0.0122699	0.0788178	0.96	7354	tags=45%, list=23%, signal=58%
GO_CADHERIN_BINDING	GO_CADHERIN_BINDING		28	0.551847	1.68427	0.0193966	0.0791105	0.961	7091	tags=57%, list=22%, signal=73%
GO_BRANCHING_INVOLVED_IN_MAMMARY_GLAND_DUCT_MORPHOGENESIS	GO_BRANCHING_INVOLVED_IN_MAMMARY_GLAND_DUCT_MORPHOGENESIS		20	0.538714	1.68419	0.0205761	0.0790465	0.961	5905	tags=35%, list=19%, signal=43%
GO_POSITIVE_REGULATION_OF_BINDING	GO_POSITIVE_REGULATION_OF_BINDING		126	0.375575	1.68368	0.00203252	0.0792874	0.961	4617	tags=29%, list=15%, signal=34%
GO_CIS_GOLGI_NETWORK	GO_CIS_GOLGI_NETWORK		39	0.546627	1.68359	0.0142857	0.0792372	0.962	5518	tags=49%, list=17%, signal=59%
GO_NEGATIVE_REGULATION_OF_ALCOHOL_BIOSYNTHETIC_PROCESS	GO_NEGATIVE_REGULATION_OF_ALCOHOL_BIOSYNTHETIC_PROCESS		17	0.540992	1.68288	0.0120724	0.0795978	0.962	5894	tags=47%, list=19%, signal=58%
GO_PHOSPHATIDYLINOSITOL_BISPHOSPHATE_BINDING	GO_PHOSPHATIDYLINOSITOL_BISPHOSPHATE_BINDING		68	0.425356	1.68271	0.0095057	0.0796184	0.962	7415	tags=41%, list=23%, signal=54%
GO_CILIARY_MEMBRANE	GO_CILIARY_MEMBRANE		70	0.442307	1.68265	0.00806452	0.0795586	0.962	3517	tags=30%, list=11%, signal=34%
GO_REGULATION_OF_ANOIKIS	GO_REGULATION_OF_ANOIKIS		24	0.514169	1.68265	0.0205761	0.0794617	0.962	1633	tags=25%, list=5%, signal=26%
GO_PATTERNING_OF_BLOOD_VESSELS	GO_PATTERNING_OF_BLOOD_VESSELS		31	0.552481	1.6824	0.0308642	0.0794887	0.962	4916	tags=42%, list=15%, signal=50%
GO_PROTEIN_BINDING_INVOLVED_IN_CELL_ADHESION	GO_PROTEIN_BINDING_INVOLVED_IN_CELL_ADHESION		17	0.590057	1.68172	0.0329897	0.0798271	0.962	4531	tags=41%, list=14%, signal=48%
GO_PEPTIDYL_SERINE_MODIFICATION	GO_PEPTIDYL_SERINE_MODIFICATION		145	0.40209	1.68157	0.00824742	0.0798385	0.962	7672	tags=44%, list=24%, signal=58%
GO_HEMATOPOIETIC_PROGENITOR_CELL_DIFFERENTIATION	GO_HEMATOPOIETIC_PROGENITOR_CELL_DIFFERENTIATION		95	0.423866	1.68139	0.0123711	0.0798472	0.962	7679	tags=45%, list=24%, signal=60%
GO_POSITIVE_REGULATION_OF_COAGULATION	GO_POSITIVE_REGULATION_OF_COAGULATION		24	0.545933	1.68098	0.0182927	0.0799751	0.963	3670	tags=38%, list=12%, signal=42%
GO_SISTER_CHROMATID_COHESION	GO_SISTER_CHROMATID_COHESION		99	0.556138	1.68054	0.0907217	0.0800856	0.963	6042	tags=58%, list=19%, signal=71%
GO_VESICLE_CYTOSKELETAL_TRAFFICKING	GO_VESICLE_CYTOSKELETAL_TRAFFICKING		36	0.534588	1.68021	0.0250522	0.0801687	0.963	5040	tags=50%, list=16%, signal=59%
GO_KINETOCHORE	GO_KINETOCHORE		103	0.526661	1.68005	0.0821355	0.0801758	0.963	7413	tags=59%, list=23%, signal=77%
GO_KIDNEY_MORPHOGENESIS	GO_KIDNEY_MORPHOGENESIS		82	0.408139	1.68003	0.00397614	0.0800956	0.963	5353	tags=32%, list=17%, signal=38%
GO_NEGATIVE_REGULATION_OF_TRANSCRIPTION_FACTOR_IMPORT_INTO_NUCLEUS	GO_NEGATIVE_REGULATION_OF_TRANSCRIPTION_FACTOR_IMPORT_INTO_NUCLEUS		38	0.465987	1.68002	0.00616016	0.0800076	0.964	5815	tags=42%, list=18%, signal=51%
GO_NUCLEAR_IMPORT	GO_NUCLEAR_IMPORT		126	0.432374	1.68001	0.0169492	0.0799194	0.964	5334	tags=34%, list=17%, signal=41%
GO_CELLULAR_RESPONSE_TO_NITROGEN_COMPOUND	GO_CELLULAR_RESPONSE_TO_NITROGEN_COMPOUND		479	0.363598	1.67892	0.00416667	0.0805232	0.965	5454	tags=29%, list=17%, signal=35%
GO_ATPASE_ACTIVITY_COUPLED	GO_ATPASE_ACTIVITY_COUPLED		309	0.373635	1.67868	0.012474	0.0805622	0.965	5414	tags=36%, list=17%, signal=43%
GO_MUSCLE_CELL_MIGRATION	GO_MUSCLE_CELL_MIGRATION		18	0.637995	1.67818	0.0293501	0.0807686	0.966	6217	tags=72%, list=20%, signal=90%
GO_POSITIVE_REGULATION_OF_MITOTIC_NUCLEAR_DIVISION	GO_POSITIVE_REGULATION_OF_MITOTIC_NUCLEAR_DIVISION		46	0.49401	1.67816	0.037422	0.0806805	0.966	6185	tags=48%, list=19%, signal=59%
GO_CULLIN_RING_UBIQUITIN_LIGASE_COMPLEX	GO_CULLIN_RING_UBIQUITIN_LIGASE_COMPLEX		143	0.394286	1.67775	0.0211538	0.0808485	0.966	4778	tags=36%, list=15%, signal=42%
GO_STRAND_DISPLACEMENT	GO_STRAND_DISPLACEMENT		25	0.618495	1.67733	0.067623	0.0810211	0.966	6717	tags=68%, list=21%, signal=86%
GO_RETINAL_GANGLION_CELL_AXON_GUIDANCE	GO_RETINAL_GANGLION_CELL_AXON_GUIDANCE		17	0.594367	1.67709	0.013834	0.0810724	0.966	6199	tags=53%, list=20%, signal=66%
GO_ATP_DEPENDENT_MICROTUBULE_MOTOR_ACTIVITY	GO_ATP_DEPENDENT_MICROTUBULE_MOTOR_ACTIVITY		18	0.649155	1.67708	0.0349794	0.0809841	0.966	4685	tags=56%, list=15%, signal=65%
GO_POSITIVE_REGULATION_OF_PROTEIN_KINASE_B_SIGNALING	GO_POSITIVE_REGULATION_OF_PROTEIN_KINASE_B_SIGNALING		80	0.429887	1.67671	0.0136452	0.0811159	0.966	3703	tags=25%, list=12%, signal=28%
GO_REGULATION_OF_PHOSPHOLIPASE_ACTIVITY	GO_REGULATION_OF_PHOSPHOLIPASE_ACTIVITY		64	0.482252	1.6766	0.020284	0.081098	0.966	5425	tags=41%, list=17%, signal=49%
GO_VASCULOGENESIS	GO_VASCULOGENESIS		57	0.48165	1.6754	0.029703	0.0817086	0.966	2745	tags=30%, list=9%, signal=33%
GO_NEGATIVE_REGULATION_OF_DNA_METABOLIC_PROCESS	GO_NEGATIVE_REGULATION_OF_DNA_METABOLIC_PROCESS		105	0.430933	1.67536	0.0203252	0.0816419	0.966	4314	tags=32%, list=14%, signal=37%
GO_RNA_POLYMERASE_II_ACTIVATING_TRANSCRIPTION_FACTOR_BINDING	GO_RNA_POLYMERASE_II_ACTIVATING_TRANSCRIPTION_FACTOR_BINDING		36	0.493491	1.67527	0.020202	0.081594	0.966	4757	tags=39%, list=15%, signal=46%
GO_PROTEIN_HETERODIMERIZATION_ACTIVITY	GO_PROTEIN_HETERODIMERIZATION_ACTIVITY		423	0.355854	1.67515	0.00203252	0.0815752	0.966	7773	tags=41%, list=24%, signal=53%
GO_REGULATION_OF_DNA_METABOLIC_PROCESS	GO_REGULATION_OF_DNA_METABOLIC_PROCESS		320	0.389546	1.67511	0.0280561	0.0814935	0.966	6529	tags=39%, list=21%, signal=49%
GO_REGULATION_OF_TRANSFORMING_GROWTH_FACTOR_BETA_PRODUCTION	GO_REGULATION_OF_TRANSFORMING_GROWTH_FACTOR_BETA_PRODUCTION		25	0.524715	1.67384	0.0201207	0.0821406	0.967	5279	tags=40%, list=17%, signal=48%
GO_CELL_DIVISION_SITE	GO_CELL_DIVISION_SITE		47	0.490847	1.67378	0.0294118	0.0820882	0.967	3249	tags=36%, list=10%, signal=40%
GO_CYSTEINE_TYPE_PEPTIDASE_ACTIVITY	GO_CYSTEINE_TYPE_PEPTIDASE_ACTIVITY		154	0.374101	1.67332	0.0119048	0.0822501	0.967	5097	tags=33%, list=16%, signal=39%
GO_NEGATIVE_REGULATION_OF_TELOMERE_MAINTENANCE	GO_NEGATIVE_REGULATION_OF_TELOMERE_MAINTENANCE		26	0.546568	1.67309	0.025	0.0823218	0.968	4684	tags=42%, list=15%, signal=50%
GO_HEPARAN_SULFATE_PROTEOGLYCAN_BIOSYNTHETIC_PROCESS	GO_HEPARAN_SULFATE_PROTEOGLYCAN_BIOSYNTHETIC_PROCESS		23	0.555868	1.67282	0.0305344	0.0823951	0.968	5971	tags=43%, list=19%, signal=54%
GO_CHROMOSOME_LOCALIZATION	GO_CHROMOSOME_LOCALIZATION		56	0.554134	1.67282	0.0458333	0.0822985	0.968	5664	tags=57%, list=18%, signal=69%
GO_CELLULAR_RESPONSE_TO_OXYGEN_LEVELS	GO_CELLULAR_RESPONSE_TO_OXYGEN_LEVELS		138	0.400595	1.67197	0.0101626	0.0826822	0.968	5248	tags=34%, list=17%, signal=41%
GO_REGULATION_OF_ANATOMICAL_STRUCTURE_SIZE	GO_REGULATION_OF_ANATOMICAL_STRUCTURE_SIZE		454	0.348237	1.6713	0.0020284	0.0829876	0.968	4380	tags=25%, list=14%, signal=28%
GO_ESTABLISHMENT_OF_MITOTIC_SPINDLE_ORIENTATION	GO_ESTABLISHMENT_OF_MITOTIC_SPINDLE_ORIENTATION		19	0.563442	1.67116	0.0207469	0.082975	0.968	7251	tags=58%, list=23%, signal=75%
GO_REGULATION_OF_PEPTIDYL_SERINE_PHOSPHORYLATION	GO_REGULATION_OF_PEPTIDYL_SERINE_PHOSPHORYLATION		98	0.412421	1.67042	0.00204918	0.0833066	0.968	4851	tags=32%, list=15%, signal=37%
GO_POST_TRANSLATIONAL_PROTEIN_MODIFICATION	GO_POST_TRANSLATIONAL_PROTEIN_MODIFICATION		35	0.505778	1.67003	0.0143149	0.0834556	0.968	4203	tags=43%, list=13%, signal=49%
GO_REGULATION_OF_CELLULAR_PROTEIN_CATABOLIC_PROCESS	GO_REGULATION_OF_CELLULAR_PROTEIN_CATABOLIC_PROCESS		264	0.421147	1.66914	0.0268041	0.0838695	0.969	4669	tags=33%, list=15%, signal=38%
GO_REGULATION_OF_NUCLEAR_DIVISION	GO_REGULATION_OF_NUCLEAR_DIVISION		152	0.444139	1.66909	0.0553191	0.0837992	0.969	5386	tags=41%, list=17%, signal=49%
GO_CELLULAR_RESPONSE_TO_VITAMIN	GO_CELLULAR_RESPONSE_TO_VITAMIN		26	0.558724	1.66904	0.0225873	0.0837369	0.969	5078	tags=46%, list=16%, signal=55%
GO_POSITIVE_REGULATION_OF_ENDOTHELIAL_CELL_MIGRATION	GO_POSITIVE_REGULATION_OF_ENDOTHELIAL_CELL_MIGRATION		65	0.459415	1.66902	0.0224033	0.0836502	0.969	6485	tags=43%, list=20%, signal=54%
GO_REGULATION_OF_VASCULATURE_DEVELOPMENT	GO_REGULATION_OF_VASCULATURE_DEVELOPMENT		223	0.42321	1.6689	0.0121457	0.083654	0.969	6921	tags=37%, list=22%, signal=47%
GO_CHROMATIN_BINDING	GO_CHROMATIN_BINDING		406	0.371145	1.66876	0.00831601	0.0836616	0.969	5073	tags=30%, list=16%, signal=36%
GO_SMOOTHENED_SIGNALING_PATHWAY	GO_SMOOTHENED_SIGNALING_PATHWAY		69	0.46197	1.66859	0.0289256	0.0836844	0.969	4324	tags=39%, list=14%, signal=45%
GO_NUCLEAR_MEMBRANE	GO_NUCLEAR_MEMBRANE		256	0.382681	1.66846	0.004329	0.0836832	0.969	4299	tags=29%, list=14%, signal=34%
GO_UBIQUITIN_LIKE_PROTEIN_LIGASE_BINDING	GO_UBIQUITIN_LIKE_PROTEIN_LIGASE_BINDING		256	0.393525	1.66844	0.00829876	0.08359	0.969	4678	tags=32%, list=15%, signal=38%
GO_POSITIVE_REGULATION_OF_CELLULAR_PROTEIN_LOCALIZATION	GO_POSITIVE_REGULATION_OF_CELLULAR_PROTEIN_LOCALIZATION		335	0.367843	1.66833	0.00206186	0.0835708	0.969	6428	tags=35%, list=20%, signal=44%
GO_BLOOD_VESSEL_ENDOTHELIAL_CELL_MIGRATION	GO_BLOOD_VESSEL_ENDOTHELIAL_CELL_MIGRATION		24	0.531913	1.66794	0.0245902	0.0837057	0.971	4214	tags=38%, list=13%, signal=43%
GO_CLATHRIN_COATED_ENDOCYTIC_VESICLE	GO_CLATHRIN_COATED_ENDOCYTIC_VESICLE		62	0.47918	1.66699	0.0323887	0.084237	0.971	7515	tags=47%, list=24%, signal=61%
GO_REGULATION_OF_RECEPTOR_BINDING	GO_REGULATION_OF_RECEPTOR_BINDING		17	0.562629	1.66589	0.0183299	0.0847803	0.971	6406	tags=65%, list=20%, signal=81%
GO_AMINO_ACID_BINDING	GO_AMINO_ACID_BINDING		106	0.400566	1.66587	0.00397614	0.0846899	0.971	5152	tags=29%, list=16%, signal=35%
GO_POSITIVE_REGULATION_OF_NERVOUS_SYSTEM_DEVELOPMENT	GO_POSITIVE_REGULATION_OF_NERVOUS_SYSTEM_DEVELOPMENT		413	0.380347	1.66564	0.00408998	0.0847404	0.971	4835	tags=29%, list=15%, signal=34%
GO_OSTEOCLAST_DIFFERENTIATION	GO_OSTEOCLAST_DIFFERENTIATION		28	0.569511	1.66525	0.0251046	0.0848778	0.971	6993	tags=57%, list=22%, signal=73%
GO_GOLGI_ASSOCIATED_VESICLE	GO_GOLGI_ASSOCIATED_VESICLE		77	0.440572	1.66515	0.0124481	0.0848473	0.971	5048	tags=36%, list=16%, signal=43%
GO_MUSCLE_ORGAN_MORPHOGENESIS	GO_MUSCLE_ORGAN_MORPHOGENESIS		66	0.433755	1.66475	0.00823045	0.0850164	0.971	4407	tags=32%, list=14%, signal=37%
GO_PHOSPHATIDYLINOSITOL_3_5_BISPHOSPHATE_BINDING	GO_PHOSPHATIDYLINOSITOL_3_5_BISPHOSPHATE_BINDING		19	0.569416	1.66463	0.022449	0.0849919	0.971	2718	tags=37%, list=9%, signal=40%
GO_RETROGRADE_TRANSPORT_ENDOSOME_TO_GOLGI	GO_RETROGRADE_TRANSPORT_ENDOSOME_TO_GOLGI		70	0.434543	1.66435	0.0123203	0.0850491	0.971	3665	tags=34%, list=12%, signal=39%
GO_RHYTHMIC_PROCESS	GO_RHYTHMIC_PROCESS		281	0.368273	1.66401	0.00209644	0.0851775	0.971	6665	tags=36%, list=21%, signal=45%
GO_ORGANIC_ACID_BINDING	GO_ORGANIC_ACID_BINDING		201	0.374034	1.66399	0	0.0850998	0.971	5152	tags=28%, list=16%, signal=34%
GO_REGULATION_OF_CARDIAC_MUSCLE_TISSUE_DEVELOPMENT	GO_REGULATION_OF_CARDIAC_MUSCLE_TISSUE_DEVELOPMENT		47	0.453011	1.6632	0.0040404	0.0855257	0.971	3739	tags=32%, list=12%, signal=36%
GO_EXOCRINE_SYSTEM_DEVELOPMENT	GO_EXOCRINE_SYSTEM_DEVELOPMENT		42	0.461652	1.6608	0.0121212	0.086883	0.971	4100	tags=33%, list=13%, signal=38%
GO_CELLULAR_CARBOHYDRATE_METABOLIC_PROCESS	GO_CELLULAR_CARBOHYDRATE_METABOLIC_PROCESS		136	0.393876	1.66066	0.012	0.0868859	0.971	5315	tags=34%, list=17%, signal=40%
GO_ACTIN_FILAMENT_BUNDLE_ORGANIZATION	GO_ACTIN_FILAMENT_BUNDLE_ORGANIZATION		44	0.48273	1.66049	0.0190678	0.0869093	0.971	5040	tags=39%, list=16%, signal=46%
GO_CELLULAR_RESPONSE_TO_PROSTAGLANDIN_E_STIMULUS	GO_CELLULAR_RESPONSE_TO_PROSTAGLANDIN_E_STIMULUS		18	0.578536	1.66033	0.0225873	0.0869228	0.971	658	tags=17%, list=2%, signal=17%
GO_ORGANELLE_FISSION	GO_ORGANELLE_FISSION		451	0.430073	1.66032	0.0754717	0.0868479	0.971	4685	tags=40%, list=15%, signal=46%
GO_NEURAL_PRECURSOR_CELL_PROLIFERATION	GO_NEURAL_PRECURSOR_CELL_PROLIFERATION		70	0.433643	1.66027	0.01002	0.086787	0.971	6957	tags=49%, list=22%, signal=62%
GO_GLOMERULAR_EPITHELIUM_DEVELOPMENT	GO_GLOMERULAR_EPITHELIUM_DEVELOPMENT		19	0.549599	1.6598	0.0250965	0.0869955	0.971	4231	tags=37%, list=13%, signal=42%
GO_REGULATION_OF_BODY_FLUID_LEVELS	GO_REGULATION_OF_BODY_FLUID_LEVELS		472	0.35196	1.65941	0	0.0871561	0.971	5750	tags=29%, list=18%, signal=35%
GO_SCHWANN_CELL_DEVELOPMENT	GO_SCHWANN_CELL_DEVELOPMENT		25	0.54089	1.65938	0.0205761	0.0870693	0.971	7961	tags=48%, list=25%, signal=64%
GO_CENTRAL_NERVOUS_SYSTEM_NEURON_AXONOGENESIS	GO_CENTRAL_NERVOUS_SYSTEM_NEURON_AXONOGENESIS		27	0.552697	1.65933	0.0201207	0.0870032	0.971	4135	tags=37%, list=13%, signal=43%
GO_CARDIAC_SEPTUM_MORPHOGENESIS	GO_CARDIAC_SEPTUM_MORPHOGENESIS		49	0.476352	1.65885	0.0222672	0.087229	0.972	5319	tags=35%, list=17%, signal=42%
GO_BONE_REMODELING	GO_BONE_REMODELING		34	0.516971	1.65882	0.028169	0.0871558	0.972	6993	tags=38%, list=22%, signal=49%
GO_PROTEASOMAL_PROTEIN_CATABOLIC_PROCESS	GO_PROTEASOMAL_PROTEIN_CATABOLIC_PROCESS		265	0.440105	1.65821	0.028866	0.0874618	0.973	5706	tags=41%, list=18%, signal=50%
GO_PROTEIN_PHOSPHATASE_BINDING	GO_PROTEIN_PHOSPHATASE_BINDING		117	0.402273	1.65819	0.0063425	0.0873819	0.973	4029	tags=31%, list=13%, signal=35%
GO_NUCLEAR_CHROMOSOME_SEGREGATION	GO_NUCLEAR_CHROMOSOME_SEGREGATION		203	0.482618	1.65777	0.0922131	0.0875051	0.973	6042	tags=51%, list=19%, signal=62%
GO_UDP_GLYCOSYLTRANSFERASE_ACTIVITY	GO_UDP_GLYCOSYLTRANSFERASE_ACTIVITY		125	0.413579	1.65753	0.0131868	0.0875313	0.973	7834	tags=47%, list=25%, signal=62%
GO_POSITIVE_REGULATION_OF_VASCULATURE_DEVELOPMENT	GO_POSITIVE_REGULATION_OF_VASCULATURE_DEVELOPMENT		129	0.442326	1.65745	0.0276134	0.0874812	0.973	6660	tags=38%, list=21%, signal=48%
GO_CELL_PROJECTION_MEMBRANE	GO_CELL_PROJECTION_MEMBRANE		282	0.358279	1.65714	0.00399202	0.0876234	0.974	5415	tags=29%, list=17%, signal=35%
GO_NEGATIVE_REGULATION_OF_CELL_AGING	GO_NEGATIVE_REGULATION_OF_CELL_AGING		16	0.559137	1.65704	0.0147368	0.0875798	0.974	4137	tags=44%, list=13%, signal=50%
GO_CELLULAR_RESPONSE_TO_INTERLEUKIN_6	GO_CELLULAR_RESPONSE_TO_INTERLEUKIN_6		22	0.549471	1.65674	0.0280561	0.087663	0.974	4829	tags=45%, list=15%, signal=54%
GO_NUCLEAR_PORE	GO_NUCLEAR_PORE		74	0.514132	1.6561	0.0388769	0.088018	0.974	4885	tags=42%, list=15%, signal=49%
GO_PROTEIN_DEPOLYMERIZATION	GO_PROTEIN_DEPOLYMERIZATION		23	0.538884	1.656	0.022541	0.0879962	0.974	4552	tags=43%, list=14%, signal=51%
GO_REGULATION_OF_MONOCYTE_CHEMOTAXIS	GO_REGULATION_OF_MONOCYTE_CHEMOTAXIS		20	0.638454	1.65598	0.0255906	0.0879256	0.974	9282	tags=80%, list=29%, signal=113%
GO_CELL_DIFFERENTIATION_INVOLVED_IN_KIDNEY_DEVELOPMENT	GO_CELL_DIFFERENTIATION_INVOLVED_IN_KIDNEY_DEVELOPMENT		35	0.486741	1.65584	0.0239521	0.0878939	0.974	4231	tags=31%, list=13%, signal=36%
GO_POLY_PURINE_TRACT_BINDING	GO_POLY_PURINE_TRACT_BINDING		18	0.582844	1.65577	0.0422535	0.087844	0.974	3650	tags=50%, list=11%, signal=56%
GO_POSITIVE_REGULATION_OF_FIBROBLAST_PROLIFERATION	GO_POSITIVE_REGULATION_OF_FIBROBLAST_PROLIFERATION		52	0.446808	1.65564	0.00631579	0.0878364	0.974	4385	tags=35%, list=14%, signal=40%
GO_REGULATION_OF_RESPONSE_TO_DNA_DAMAGE_STIMULUS	GO_REGULATION_OF_RESPONSE_TO_DNA_DAMAGE_STIMULUS		136	0.402162	1.65549	0.0221328	0.0878701	0.975	4774	tags=33%, list=15%, signal=39%
GO_CELLULAR_RESPONSE_TO_UV	GO_CELLULAR_RESPONSE_TO_UV		65	0.442547	1.65547	0.0321932	0.0877851	0.975	5367	tags=45%, list=17%, signal=54%
GO_REGULATION_OF_DNA_TEMPLATED_TRANSCRIPTION_INITIATION	GO_REGULATION_OF_DNA_TEMPLATED_TRANSCRIPTION_INITIATION		31	0.499519	1.65541	0.0181818	0.087733	0.975	4178	tags=35%, list=13%, signal=41%
GO_NEGATIVE_REGULATION_OF_CELL_CYCLE_G1_S_PHASE_TRANSITION	GO_NEGATIVE_REGULATION_OF_CELL_CYCLE_G1_S_PHASE_TRANSITION		92	0.439278	1.65528	0.0190678	0.0877391	0.975	6220	tags=43%, list=20%, signal=54%
GO_POSITIVE_REGULATION_OF_ESTABLISHMENT_OF_PROTEIN_LOCALIZATION	GO_POSITIVE_REGULATION_OF_ESTABLISHMENT_OF_PROTEIN_LOCALIZATION		480	0.343137	1.65519	0	0.0877026	0.975	7239	tags=36%, list=23%, signal=46%
GO_NEGATIVE_CHEMOTAXIS	GO_NEGATIVE_CHEMOTAXIS		39	0.484367	1.65509	0.0216535	0.0876683	0.975	4214	tags=36%, list=13%, signal=41%
GO_ACTIVATION_OF_MAPKK_ACTIVITY	GO_ACTIVATION_OF_MAPKK_ACTIVITY		48	0.485796	1.65502	0.0200803	0.0876149	0.975	7773	tags=56%, list=24%, signal=74%
GO_REGULATION_OF_LIPASE_ACTIVITY	GO_REGULATION_OF_LIPASE_ACTIVITY		83	0.438145	1.65496	0.00814664	0.0875657	0.975	5425	tags=39%, list=17%, signal=46%
GO_NEGATIVE_REGULATION_OF_EXTRINSIC_APOPTOTIC_SIGNALING_PATHWAY	GO_NEGATIVE_REGULATION_OF_EXTRINSIC_APOPTOTIC_SIGNALING_PATHWAY		96	0.428627	1.6547	0.0206612	0.0876205	0.975	5906	tags=30%, list=19%, signal=37%
GO_PROTEIN_N_LINKED_GLYCOSYLATION	GO_PROTEIN_N_LINKED_GLYCOSYLATION		73	0.472675	1.65456	0.0226337	0.0875991	0.976	7206	tags=49%, list=23%, signal=64%
GO_GOLGI_ASSOCIATED_VESICLE_MEMBRANE	GO_GOLGI_ASSOCIATED_VESICLE_MEMBRANE		46	0.475115	1.65391	0.0161616	0.0879286	0.976	2647	tags=30%, list=8%, signal=33%
GO_POSITIVE_REGULATION_OF_CELL_PROJECTION_ORGANIZATION	GO_POSITIVE_REGULATION_OF_CELL_PROJECTION_ORGANIZATION		290	0.381497	1.65379	0.00207039	0.0878981	0.976	4835	tags=30%, list=15%, signal=35%
GO_MOVEMENT_IN_ENVIRONMENT_OF_OTHER_ORGANISM_INVOLVED_IN_SYMBIOTIC_INTERACTION	GO_MOVEMENT_IN_ENVIRONMENT_OF_OTHER_ORGANISM_INVOLVED_IN_SYMBIOTIC_INTERACTION		80	0.47367	1.6535	0.0325203	0.087972	0.976	5630	tags=39%, list=18%, signal=47%
GO_ENTRY_INTO_CELL_OF_OTHER_ORGANISM_INVOLVED_IN_SYMBIOTIC_INTERACTION	GO_ENTRY_INTO_CELL_OF_OTHER_ORGANISM_INVOLVED_IN_SYMBIOTIC_INTERACTION		80	0.47367	1.6535	0.0325203	0.0878765	0.976	5630	tags=39%, list=18%, signal=47%
GO_ENTRY_INTO_HOST	GO_ENTRY_INTO_HOST		80	0.47367	1.6535	0.0325203	0.0877812	0.976	5630	tags=39%, list=18%, signal=47%
GO_ENTRY_INTO_OTHER_ORGANISM_INVOLVED_IN_SYMBIOTIC_INTERACTION	GO_ENTRY_INTO_OTHER_ORGANISM_INVOLVED_IN_SYMBIOTIC_INTERACTION		80	0.47367	1.6535	0.0325203	0.0876861	0.976	5630	tags=39%, list=18%, signal=47%
GO_VIRAL_ENTRY_INTO_HOST_CELL	GO_VIRAL_ENTRY_INTO_HOST_CELL		80	0.47367	1.6535	0.0325203	0.0875912	0.976	5630	tags=39%, list=18%, signal=47%
GO_MOVEMENT_IN_HOST_ENVIRONMENT	GO_MOVEMENT_IN_HOST_ENVIRONMENT		80	0.47367	1.6535	0.0325203	0.0874965	0.976	5630	tags=39%, list=18%, signal=47%
GO_ENTRY_INTO_HOST_CELL	GO_ENTRY_INTO_HOST_CELL		80	0.47367	1.6535	0.0325203	0.087402	0.976	5630	tags=39%, list=18%, signal=47%
GO_REGULATION_OF_LAMELLIPODIUM_ASSEMBLY	GO_REGULATION_OF_LAMELLIPODIUM_ASSEMBLY		24	0.569047	1.65282	0.0229645	0.0877518	0.977	2783	tags=38%, list=9%, signal=41%
GO_REGULATION_OF_SMAD_PROTEIN_IMPORT_INTO_NUCLEUS	GO_REGULATION_OF_SMAD_PROTEIN_IMPORT_INTO_NUCLEUS		16	0.587573	1.65265	0.0460922	0.0877928	0.977	5394	tags=50%, list=17%, signal=60%
GO_REGULATION_OF_DEFENSE_RESPONSE_TO_VIRUS	GO_REGULATION_OF_DEFENSE_RESPONSE_TO_VIRUS		182	0.384118	1.65252	0.0122951	0.0877953	0.977	5815	tags=32%, list=18%, signal=39%
GO_REGULATION_OF_CELL_SHAPE	GO_REGULATION_OF_CELL_SHAPE		134	0.416156	1.65235	0.0188679	0.0878232	0.977	4759	tags=34%, list=15%, signal=39%
GO_MULTICELLULAR_ORGANISM_GROWTH	GO_MULTICELLULAR_ORGANISM_GROWTH		74	0.408881	1.65213	0.00813008	0.0878554	0.977	5466	tags=41%, list=17%, signal=49%
GO_EXTRACELLULAR_MATRIX_DISASSEMBLY	GO_EXTRACELLULAR_MATRIX_DISASSEMBLY		73	0.493541	1.65202	0.0384615	0.0878323	0.977	6350	tags=42%, list=20%, signal=53%
GO_GOLGI_TO_PLASMA_MEMBRANE_PROTEIN_TRANSPORT	GO_GOLGI_TO_PLASMA_MEMBRANE_PROTEIN_TRANSPORT		26	0.533303	1.65186	0.0223124	0.0878228	0.977	6118	tags=54%, list=19%, signal=67%
GO_LAMELLIPODIUM_ASSEMBLY	GO_LAMELLIPODIUM_ASSEMBLY		28	0.481944	1.65176	0.015748	0.0877703	0.977	5019	tags=36%, list=16%, signal=42%
GO_POSITIVE_REGULATION_OF_WOUND_HEALING	GO_POSITIVE_REGULATION_OF_WOUND_HEALING		45	0.445348	1.65174	0.0121212	0.0876861	0.977	1922	tags=27%, list=6%, signal=28%
GO_REGULATION_OF_KERATINOCYTE_PROLIFERATION	GO_REGULATION_OF_KERATINOCYTE_PROLIFERATION		26	0.538142	1.65157	0.0283401	0.0877153	0.977	5024	tags=46%, list=16%, signal=55%
GO_PODOSOME	GO_PODOSOME		23	0.601244	1.65128	0.0292887	0.0878135	0.977	1524	tags=35%, list=5%, signal=37%
GO_NEGATIVE_REGULATION_OF_ESTABLISHMENT_OF_PROTEIN_LOCALIZATION	GO_NEGATIVE_REGULATION_OF_ESTABLISHMENT_OF_PROTEIN_LOCALIZATION		198	0.361822	1.65122	0.00205339	0.0877445	0.977	4389	tags=26%, list=14%, signal=30%
GO_DOUBLE_STRAND_BREAK_REPAIR	GO_DOUBLE_STRAND_BREAK_REPAIR		152	0.446536	1.65102	0.0560166	0.087763	0.977	7378	tags=49%, list=23%, signal=64%
GO_MESODERMAL_CELL_DIFFERENTIATION	GO_MESODERMAL_CELL_DIFFERENTIATION		26	0.523212	1.65042	0.0167364	0.088048	0.977	4531	tags=38%, list=14%, signal=45%
GO_PHAGOCYTOSIS	GO_PHAGOCYTOSIS		183	0.454027	1.6504	0.043222	0.0879733	0.977	7654	tags=43%, list=24%, signal=57%
GO_RNA_POLYMERASE_BINDING	GO_RNA_POLYMERASE_BINDING		32	0.495907	1.64964	0.0243363	0.0883707	0.978	5567	tags=44%, list=18%, signal=53%
GO_SPECIFICATION_OF_SYMMETRY	GO_SPECIFICATION_OF_SYMMETRY		111	0.404737	1.64957	0.0268041	0.0882988	0.978	5575	tags=36%, list=18%, signal=44%
GO_FOCAL_ADHESION_ASSEMBLY	GO_FOCAL_ADHESION_ASSEMBLY		23	0.540958	1.64946	0.033543	0.0882697	0.978	5425	tags=48%, list=17%, signal=58%
GO_CELL_SUBSTRATE_ADHERENS_JUNCTION_ASSEMBLY	GO_CELL_SUBSTRATE_ADHERENS_JUNCTION_ASSEMBLY		23	0.540958	1.64946	0.033543	0.0881762	0.978	5425	tags=48%, list=17%, signal=58%
GO_MEMBRANE_LIPID_METABOLIC_PROCESS	GO_MEMBRANE_LIPID_METABOLIC_PROCESS		174	0.398479	1.64916	0.0125261	0.0882884	0.978	6460	tags=41%, list=20%, signal=51%
GO_NEGATIVE_REGULATION_OF_VASCULATURE_DEVELOPMENT	GO_NEGATIVE_REGULATION_OF_VASCULATURE_DEVELOPMENT		74	0.467685	1.64911	0.0379242	0.0882347	0.978	3941	tags=27%, list=12%, signal=31%
GO_GLYCOSPHINGOLIPID_METABOLIC_PROCESS	GO_GLYCOSPHINGOLIPID_METABOLIC_PROCESS		65	0.440564	1.6489	0.0319361	0.0882707	0.978	7206	tags=49%, list=23%, signal=64%
GO_REGULATION_OF_CELL_AGING	GO_REGULATION_OF_CELL_AGING		32	0.486109	1.6488	0.0149573	0.0882258	0.978	4314	tags=38%, list=14%, signal=43%
GO_POSITIVE_REGULATION_OF_CARDIAC_MUSCLE_TISSUE_DEVELOPMENT	GO_POSITIVE_REGULATION_OF_CARDIAC_MUSCLE_TISSUE_DEVELOPMENT		28	0.496741	1.64879	0.00843882	0.088136	0.978	8311	tags=61%, list=26%, signal=82%
GO_CELL_MIGRATION_INVOLVED_IN_SPROUTING_ANGIOGENESIS	GO_CELL_MIGRATION_INVOLVED_IN_SPROUTING_ANGIOGENESIS		15	0.636826	1.64808	0.0288066	0.0884898	0.979	3162	tags=40%, list=10%, signal=44%
GO_RESPONSE_TO_IONIZING_RADIATION	GO_RESPONSE_TO_IONIZING_RADIATION		138	0.419323	1.64771	0.0391753	0.088658	0.979	6201	tags=39%, list=20%, signal=48%
GO_RESPONSE_TO_FIBROBLAST_GROWTH_FACTOR	GO_RESPONSE_TO_FIBROBLAST_GROWTH_FACTOR		110	0.393833	1.64743	0.0165289	0.0887401	0.979	5345	tags=39%, list=17%, signal=47%
GO_POSITIVE_REGULATION_OF_LIPID_CATABOLIC_PROCESS	GO_POSITIVE_REGULATION_OF_LIPID_CATABOLIC_PROCESS		25	0.525945	1.64742	0.0178571	0.0886537	0.979	4338	tags=44%, list=14%, signal=51%
GO_EMBRYONIC_DIGESTIVE_TRACT_MORPHOGENESIS	GO_EMBRYONIC_DIGESTIVE_TRACT_MORPHOGENESIS		17	0.588417	1.64722	0.0167715	0.0886768	0.979	4111	tags=47%, list=13%, signal=54%
GO_TRACHEA_DEVELOPMENT	GO_TRACHEA_DEVELOPMENT		20	0.553845	1.64708	0.0307692	0.0886794	0.979	3642	tags=40%, list=11%, signal=45%
GO_REGULATION_OF_EXTRINSIC_APOPTOTIC_SIGNALING_PATHWAY	GO_REGULATION_OF_EXTRINSIC_APOPTOTIC_SIGNALING_PATHWAY		149	0.405694	1.64704	0.00835073	0.0886081	0.979	5915	tags=31%, list=19%, signal=38%
GO_SMOOTH_MUSCLE_CELL_DIFFERENTIATION	GO_SMOOTH_MUSCLE_CELL_DIFFERENTIATION		30	0.493633	1.64674	0.0263692	0.0887183	0.98	5688	tags=40%, list=18%, signal=49%
GO_INTERACTION_WITH_SYMBIONT	GO_INTERACTION_WITH_SYMBIONT		51	0.441387	1.64506	0.0173077	0.0896603	0.98	4318	tags=33%, list=14%, signal=39%
GO_DOPAMINERGIC_NEURON_DIFFERENTIATION	GO_DOPAMINERGIC_NEURON_DIFFERENTIATION		26	0.491587	1.64484	0.0195312	0.0897136	0.98	7438	tags=50%, list=23%, signal=65%
GO_RESPONSE_TO_RADIATION	GO_RESPONSE_TO_RADIATION		387	0.347832	1.64439	0.00626305	0.0899232	0.98	6717	tags=36%, list=21%, signal=45%
GO_MUSCLE_CELL_DEVELOPMENT	GO_MUSCLE_CELL_DEVELOPMENT		116	0.41345	1.64325	0.00619835	0.0905	0.981	4774	tags=33%, list=15%, signal=38%
GO_CELLULAR_RESPONSE_TO_STEROID_HORMONE_STIMULUS	GO_CELLULAR_RESPONSE_TO_STEROID_HORMONE_STIMULUS		205	0.359776	1.64275	0.00639659	0.0907394	0.981	5551	tags=33%, list=17%, signal=39%
GO_MAINTENANCE_OF_PROTEIN_LOCALIZATION_IN_ORGANELLE	GO_MAINTENANCE_OF_PROTEIN_LOCALIZATION_IN_ORGANELLE		29	0.489809	1.64263	0.0334728	0.0907256	0.981	3413	tags=34%, list=11%, signal=39%
GO_REGULATION_OF_DNA_RECOMBINATION	GO_REGULATION_OF_DNA_RECOMBINATION		53	0.470887	1.6416	0.0278884	0.0912758	0.981	6467	tags=42%, list=20%, signal=52%
GO_EAR_MORPHOGENESIS	GO_EAR_MORPHOGENESIS		111	0.39097	1.64124	0	0.0914313	0.981	4422	tags=29%, list=14%, signal=33%
GO_POSITIVE_REGULATION_OF_NEURON_DIFFERENTIATION	GO_POSITIVE_REGULATION_OF_NEURON_DIFFERENTIATION		295	0.393312	1.64109	0.0125786	0.0914142	0.981	4835	tags=29%, list=15%, signal=34%
GO_REGULATION_OF_FIBROBLAST_PROLIFERATION	GO_REGULATION_OF_FIBROBLAST_PROLIFERATION		80	0.415331	1.64078	0.0131291	0.0915189	0.982	4385	tags=31%, list=14%, signal=36%
GO_RIBONUCLEOPROTEIN_GRANULE	GO_RIBONUCLEOPROTEIN_GRANULE		137	0.414243	1.64069	0.018711	0.0914793	0.982	3959	tags=31%, list=12%, signal=36%
GO_ERK1_AND_ERK2_CASCADE	GO_ERK1_AND_ERK2_CASCADE		21	0.524845	1.64031	0.0149573	0.0916686	0.982	4385	tags=43%, list=14%, signal=50%
GO_CORTICAL_CYTOSKELETON_ORGANIZATION	GO_CORTICAL_CYTOSKELETON_ORGANIZATION		35	0.497257	1.63931	0.0207039	0.0921487	0.982	4135	tags=37%, list=13%, signal=43%
GO_MICROTUBULE_ASSOCIATED_COMPLEX	GO_MICROTUBULE_ASSOCIATED_COMPLEX		141	0.413672	1.63858	0.0305499	0.0925393	0.982	5162	tags=38%, list=16%, signal=45%
GO_RESPONSE_TO_CARBOHYDRATE	GO_RESPONSE_TO_CARBOHYDRATE		159	0.366852	1.63845	0.00406504	0.0925436	0.982	5304	tags=31%, list=17%, signal=38%
GO_PROTEIN_K63_LINKED_UBIQUITINATION	GO_PROTEIN_K63_LINKED_UBIQUITINATION		35	0.502268	1.63789	0.0258065	0.0927834	0.982	5168	tags=40%, list=16%, signal=48%
GO_MODIFIED_AMINO_ACID_BINDING	GO_MODIFIED_AMINO_ACID_BINDING		64	0.400759	1.63762	0.00967118	0.0928639	0.982	4090	tags=28%, list=13%, signal=32%
GO_EMBRYONIC_HINDLIMB_MORPHOGENESIS	GO_EMBRYONIC_HINDLIMB_MORPHOGENESIS		27	0.514319	1.63752	0.0147679	0.0928211	0.982	4362	tags=33%, list=14%, signal=39%
GO_FOREBRAIN_DEVELOPMENT	GO_FOREBRAIN_DEVELOPMENT		344	0.379772	1.63723	0.0159363	0.0929233	0.983	5504	tags=33%, list=17%, signal=39%
GO_TRANSCRIPTION_FACTOR_ACTIVITY_RNA_POLYMERASE_II_DISTAL_ENHANCER_SEQUENCE_SPECIFIC_BINDING	GO_TRANSCRIPTION_FACTOR_ACTIVITY_RNA_POLYMERASE_II_DISTAL_ENHANCER_SEQUENCE_SPECIFIC_BINDING		81	0.417015	1.63714	0.0124481	0.0928944	0.983	4231	tags=32%, list=13%, signal=37%
GO_MODIFICATION_OF_MORPHOLOGY_OR_PHYSIOLOGY_OF_OTHER_ORGANISM	GO_MODIFICATION_OF_MORPHOLOGY_OR_PHYSIOLOGY_OF_OTHER_ORGANISM		94	0.421403	1.63711	0.016	0.0928213	0.983	5270	tags=35%, list=17%, signal=42%
GO_RETINOIC_ACID_RECEPTOR_BINDING	GO_RETINOIC_ACID_RECEPTOR_BINDING		28	0.509568	1.63706	0.0460251	0.0927559	0.983	5040	tags=46%, list=16%, signal=55%
GO_CELLULAR_RESPONSE_TO_CALCIUM_ION	GO_CELLULAR_RESPONSE_TO_CALCIUM_ION		46	0.427034	1.63699	0.00598802	0.0926995	0.983	4575	tags=37%, list=14%, signal=43%
GO_REGULATION_OF_STRESS_ACTIVATED_PROTEIN_KINASE_SIGNALING_CASCADE	GO_REGULATION_OF_STRESS_ACTIVATED_PROTEIN_KINASE_SIGNALING_CASCADE		194	0.366252	1.63692	0.00804829	0.0926544	0.983	4360	tags=28%, list=14%, signal=33%
GO_RESPONSE_TO_LEAD_ION	GO_RESPONSE_TO_LEAD_ION		19	0.527974	1.63668	0.0159681	0.0927283	0.983	3582	tags=37%, list=11%, signal=41%
GO_MITOTIC_CELL_CYCLE_CHECKPOINT	GO_MITOTIC_CELL_CYCLE_CHECKPOINT		129	0.44459	1.63664	0.0769231	0.092655	0.983	6562	tags=47%, list=21%, signal=59%
GO_REGULATION_OF_METANEPHROS_DEVELOPMENT	GO_REGULATION_OF_METANEPHROS_DEVELOPMENT		23	0.566273	1.63648	0.0278884	0.0926685	0.983	3344	tags=35%, list=11%, signal=39%
GO_VITAMIN_D_RECEPTOR_BINDING	GO_VITAMIN_D_RECEPTOR_BINDING		17	0.565849	1.63641	0.0236052	0.0926254	0.983	1512	tags=35%, list=5%, signal=37%
GO_HINDLIMB_MORPHOGENESIS	GO_HINDLIMB_MORPHOGENESIS		35	0.491466	1.63621	0.0169133	0.0926746	0.983	5026	tags=34%, list=16%, signal=41%
GO_GLYCOPROTEIN_COMPLEX	GO_GLYCOPROTEIN_COMPLEX		21	0.557801	1.6362	0.0269231	0.0925902	0.983	5013	tags=38%, list=16%, signal=45%
GO_PROTEIN_DEPHOSPHORYLATION	GO_PROTEIN_DEPHOSPHORYLATION		179	0.382382	1.63605	0.00821355	0.0925997	0.983	5011	tags=31%, list=16%, signal=37%
GO_CHROMOSOME_SEGREGATION	GO_CHROMOSOME_SEGREGATION		246	0.472497	1.63577	0.0876827	0.0926898	0.983	6042	tags=49%, list=19%, signal=60%
GO_SIGNAL_TRANSDUCTION_BY_PROTEIN_PHOSPHORYLATION	GO_SIGNAL_TRANSDUCTION_BY_PROTEIN_PHOSPHORYLATION		389	0.349218	1.63514	0.00411523	0.0930517	0.983	5386	tags=31%, list=17%, signal=36%
GO_REGULATION_OF_PROTEIN_SERINE_THREONINE_KINASE_ACTIVITY	GO_REGULATION_OF_PROTEIN_SERINE_THREONINE_KINASE_ACTIVITY		457	0.347222	1.63478	0.00411523	0.0931854	0.983	6921	tags=37%, list=22%, signal=47%
GO_PURINE_NUCLEOBASE_METABOLIC_PROCESS	GO_PURINE_NUCLEOBASE_METABOLIC_PROCESS		20	0.552089	1.63422	0.0469388	0.0934596	0.983	6852	tags=40%, list=22%, signal=51%
GO_G2_DNA_DAMAGE_CHECKPOINT	GO_G2_DNA_DAMAGE_CHECKPOINT		32	0.539834	1.63402	0.0476191	0.0935203	0.983	6415	tags=69%, list=20%, signal=86%
GO_REGULATION_OF_GLUCOSE_IMPORT_IN_RESPONSE_TO_INSULIN_STIMULUS	GO_REGULATION_OF_GLUCOSE_IMPORT_IN_RESPONSE_TO_INSULIN_STIMULUS		16	0.552026	1.63373	0.0181818	0.093633	0.983	3120	tags=38%, list=10%, signal=42%
GO_GLIOGENESIS	GO_GLIOGENESIS		168	0.385722	1.63355	0.0143737	0.0936499	0.983	5304	tags=31%, list=17%, signal=37%
GO_SINGLE_ORGANISM_MEMBRANE_BUDDING	GO_SINGLE_ORGANISM_MEMBRANE_BUDDING		71	0.484888	1.63337	0.0325203	0.0936557	0.983	5019	tags=41%, list=16%, signal=48%
GO_TUBULIN_BINDING	GO_TUBULIN_BINDING		259	0.396028	1.63311	0.0259481	0.0937295	0.983	8199	tags=48%, list=26%, signal=65%
GO_MITOTIC_G2_M_TRANSITION_CHECKPOINT	GO_MITOTIC_G2_M_TRANSITION_CHECKPOINT		17	0.603692	1.63206	0.0632653	0.0943209	0.983	6415	tags=76%, list=20%, signal=96%
GO_PERICENTRIOLAR_MATERIAL	GO_PERICENTRIOLAR_MATERIAL		18	0.596067	1.63171	0.0394191	0.0944502	0.984	7239	tags=78%, list=23%, signal=101%
GO_REGULATION_OF_FIBROBLAST_MIGRATION	GO_REGULATION_OF_FIBROBLAST_MIGRATION		27	0.528864	1.63126	0.0207469	0.0946521	0.984	5677	tags=48%, list=18%, signal=59%
GO_THIOL_DEPENDENT_UBIQUITIN_SPECIFIC_PROTEASE_ACTIVITY	GO_THIOL_DEPENDENT_UBIQUITIN_SPECIFIC_PROTEASE_ACTIVITY		69	0.450794	1.63103	0.0458333	0.0947035	0.984	4201	tags=36%, list=13%, signal=42%
GO_REGULATION_OF_ACTIVIN_RECEPTOR_SIGNALING_PATHWAY	GO_REGULATION_OF_ACTIVIN_RECEPTOR_SIGNALING_PATHWAY		25	0.469079	1.63097	0.0208768	0.094649	0.984	4100	tags=28%, list=13%, signal=32%
GO_CLATHRIN_COATED_VESICLE_MEMBRANE	GO_CLATHRIN_COATED_VESICLE_MEMBRANE		78	0.427336	1.62952	0.0120968	0.095495	0.984	5211	tags=38%, list=16%, signal=46%
GO_REGULATION_OF_LAMELLIPODIUM_ORGANIZATION	GO_REGULATION_OF_LAMELLIPODIUM_ORGANIZATION		32	0.512734	1.62889	0.027957	0.0957896	0.984	2783	tags=31%, list=9%, signal=34%
GO_THYROID_HORMONE_RECEPTOR_BINDING	GO_THYROID_HORMONE_RECEPTOR_BINDING		30	0.475105	1.62884	0.0439331	0.0957236	0.984	4010	tags=37%, list=13%, signal=42%
GO_ENZYME_ACTIVATOR_ACTIVITY	GO_ENZYME_ACTIVATOR_ACTIVITY		445	0.331968	1.62881	0.00211416	0.0956412	0.984	5689	tags=32%, list=18%, signal=39%
GO_SEX_DIFFERENTIATION	GO_SEX_DIFFERENTIATION		245	0.353036	1.62838	0.004158	0.0958152	0.984	4835	tags=27%, list=15%, signal=32%
GO_TRANS_GOLGI_NETWORK_TRANSPORT_VESICLE	GO_TRANS_GOLGI_NETWORK_TRANSPORT_VESICLE		27	0.487	1.62753	0.0357853	0.0963094	0.984	6096	tags=52%, list=19%, signal=64%
GO_POSITIVE_REGULATION_OF_TRANSFORMING_GROWTH_FACTOR_BETA_PRODUCTION	GO_POSITIVE_REGULATION_OF_TRANSFORMING_GROWTH_FACTOR_BETA_PRODUCTION		16	0.580754	1.62726	0.0238569	0.0964054	0.984	5279	tags=38%, list=17%, signal=45%
GO_CYTOPLASMIC_MRNA_PROCESSING_BODY	GO_CYTOPLASMIC_MRNA_PROCESSING_BODY		61	0.444296	1.62714	0.0309917	0.096393	0.984	4285	tags=34%, list=13%, signal=40%
GO_MATERNAL_PROCESS_INVOLVED_IN_FEMALE_PREGNANCY	GO_MATERNAL_PROCESS_INVOLVED_IN_FEMALE_PREGNANCY		58	0.437832	1.62697	0.0126316	0.0964172	0.984	3946	tags=33%, list=12%, signal=37%
GO_LYTIC_VACUOLE	GO_LYTIC_VACUOLE		494	0.372059	1.62676	0.0191083	0.0964829	0.986	5711	tags=34%, list=18%, signal=41%
GO_POSITIVE_REGULATION_OF_PROTEIN_LOCALIZATION_TO_NUCLEUS	GO_POSITIVE_REGULATION_OF_PROTEIN_LOCALIZATION_TO_NUCLEUS		126	0.387015	1.62542	0.0200401	0.0973356	0.986	7239	tags=44%, list=23%, signal=56%
GO_MITOPHAGY_IN_RESPONSE_TO_MITOCHONDRIAL_DEPOLARIZATION	GO_MITOPHAGY_IN_RESPONSE_TO_MITOCHONDRIAL_DEPOLARIZATION		128	0.364716	1.62537	0.00204918	0.097277	0.986	5761	tags=35%, list=18%, signal=43%
GO_RESPONSE_TO_MITOCHONDRIAL_DEPOLARISATION	GO_RESPONSE_TO_MITOCHONDRIAL_DEPOLARISATION		128	0.364715	1.62537	0.00204918	0.0971825	0.986	5761	tags=35%, list=18%, signal=43%
GO_MACROMITOPHAGY	GO_MACROMITOPHAGY		128	0.364715	1.62537	0.00204918	0.0970869	0.986	5761	tags=35%, list=18%, signal=43%
GO_POSITIVE_REGULATION_OF_MULTI_ORGANISM_PROCESS	GO_POSITIVE_REGULATION_OF_MULTI_ORGANISM_PROCESS		144	0.401325	1.62532	0.0244399	0.0970172	0.986	5567	tags=35%, list=18%, signal=43%
GO_GENITALIA_DEVELOPMENT	GO_GENITALIA_DEVELOPMENT		42	0.442296	1.62497	0.0107991	0.0971683	0.987	5772	tags=38%, list=18%, signal=46%
GO_PHOSPHATIDYLINOSITOL_3_PHOSPHATE_BINDING	GO_PHOSPHATIDYLINOSITOL_3_PHOSPHATE_BINDING		30	0.462106	1.62437	0.0294737	0.0974703	0.987	2718	tags=27%, list=9%, signal=29%
GO_TRANSCRIPTION_INITIATION_FROM_RNA_POLYMERASE_II_PROMOTER	GO_TRANSCRIPTION_INITIATION_FROM_RNA_POLYMERASE_II_PROMOTER		151	0.35939	1.62425	0.0145833	0.0974369	0.987	4107	tags=28%, list=13%, signal=33%
GO_NEGATIVE_REGULATION_OF_DNA_BINDING	GO_NEGATIVE_REGULATION_OF_DNA_BINDING		46	0.450454	1.62414	0.0103306	0.0974153	0.987	8658	tags=57%, list=27%, signal=78%
GO_NEGATIVE_REGULATION_OF_DNA_DEPENDENT_DNA_REPLICATION	GO_NEGATIVE_REGULATION_OF_DNA_DEPENDENT_DNA_REPLICATION		15	0.613943	1.62393	0.0487805	0.0974554	0.987	5466	tags=53%, list=17%, signal=64%
GO_VENTRICULAR_CARDIAC_MUSCLE_CELL_DIFFERENTIATION	GO_VENTRICULAR_CARDIAC_MUSCLE_CELL_DIFFERENTIATION		17	0.54346	1.62375	0.00849257	0.097482	0.987	8585	tags=59%, list=27%, signal=81%
GO_POSITIVE_REGULATION_OF_EXTRINSIC_APOPTOTIC_SIGNALING_PATHWAY	GO_POSITIVE_REGULATION_OF_EXTRINSIC_APOPTOTIC_SIGNALING_PATHWAY		51	0.470705	1.62374	0.027957	0.0973925	0.987	6656	tags=43%, list=21%, signal=54%
GO_RECEPTOR_SIGNALING_PROTEIN_SERINE_THREONINE_KINASE_ACTIVITY	GO_RECEPTOR_SIGNALING_PROTEIN_SERINE_THREONINE_KINASE_ACTIVITY		85	0.422414	1.62301	0.0186335	0.0978125	0.987	4360	tags=33%, list=14%, signal=38%
GO_MICROVILLUS_ORGANIZATION	GO_MICROVILLUS_ORGANIZATION		19	0.580952	1.62288	0.046875	0.0978056	0.987	1768	tags=32%, list=6%, signal=33%
GO_POSITIVE_REGULATION_OF_CELLULAR_PROTEIN_CATABOLIC_PROCESS	GO_POSITIVE_REGULATION_OF_CELLULAR_PROTEIN_CATABOLIC_PROCESS		186	0.420818	1.62231	0.0425963	0.0980805	0.987	4669	tags=33%, list=15%, signal=39%
GO_REGULATION_OF_CELLULAR_RESPONSE_TO_HEAT	GO_REGULATION_OF_CELLULAR_RESPONSE_TO_HEAT		72	0.491413	1.62206	0.0641822	0.0981408	0.987	5352	tags=39%, list=17%, signal=47%
GO_BONE_RESORPTION	GO_BONE_RESORPTION		20	0.56188	1.62141	0.041502	0.0984969	0.987	3861	tags=30%, list=12%, signal=34%
GO_PROTEIN_LOCALIZATION_TO_CELL_PERIPHERY	GO_PROTEIN_LOCALIZATION_TO_CELL_PERIPHERY		150	0.363568	1.62105	0.010142	0.0986473	0.987	3703	tags=27%, list=12%, signal=30%
GO_NEURON_MIGRATION	GO_NEURON_MIGRATION		104	0.435157	1.62101	0.0159681	0.0985856	0.987	4363	tags=29%, list=14%, signal=33%
GO_UBIQUITIN_LIKE_PROTEIN_SPECIFIC_PROTEASE_ACTIVITY	GO_UBIQUITIN_LIKE_PROTEIN_SPECIFIC_PROTEASE_ACTIVITY		92	0.424648	1.62072	0.0538302	0.0986613	0.987	4291	tags=35%, list=14%, signal=40%
GO_PROTEIN_SUMOYLATION	GO_PROTEIN_SUMOYLATION		112	0.452378	1.62063	0.0669456	0.0986097	0.987	4678	tags=36%, list=15%, signal=42%
GO_RETROGRADE_TRANSPORT_VESICLE_RECYCLING_WITHIN_GOLGI	GO_RETROGRADE_TRANSPORT_VESICLE_RECYCLING_WITHIN_GOLGI		22	0.569729	1.62046	0.0146444	0.09861	0.988	4754	tags=45%, list=15%, signal=53%
GO_CARDIAC_MUSCLE_CELL_DIFFERENTIATION	GO_CARDIAC_MUSCLE_CELL_DIFFERENTIATION		70	0.414419	1.62027	0.0164948	0.0986479	0.988	3141	tags=27%, list=10%, signal=30%
GO_KINESIN_COMPLEX	GO_KINESIN_COMPLEX		53	0.486337	1.61992	0.045929	0.0987911	0.989	5162	tags=47%, list=16%, signal=56%
GO_NUCLEAR_MATRIX	GO_NUCLEAR_MATRIX		95	0.411467	1.61957	0.039501	0.0989318	0.989	5367	tags=37%, list=17%, signal=44%
GO_TELOMERE_CAPPING	GO_TELOMERE_CAPPING		24	0.556451	1.61956	0.0387755	0.0988492	0.989	4518	tags=42%, list=14%, signal=49%
GO_RESPONSE_TO_UV	GO_RESPONSE_TO_UV		121	0.402969	1.61952	0.0509165	0.098781	0.989	7505	tags=50%, list=24%, signal=66%
GO_RAN_GTPASE_BINDING	GO_RAN_GTPASE_BINDING		31	0.582285	1.61905	0.0463576	0.0989816	0.989	4816	tags=48%, list=15%, signal=57%
GO_NUCLEUS_LOCALIZATION	GO_NUCLEUS_LOCALIZATION		20	0.572884	1.61775	0.0461847	0.0998088	0.989	7002	tags=65%, list=22%, signal=83%
GO_FC_GAMMA_RECEPTOR_SIGNALING_PATHWAY	GO_FC_GAMMA_RECEPTOR_SIGNALING_PATHWAY		92	0.488077	1.61759	0.0377734	0.0998288	0.99	8492	tags=50%, list=27%, signal=68%
GO_REGULATION_OF_PHOSPHOPROTEIN_PHOSPHATASE_ACTIVITY	GO_REGULATION_OF_PHOSPHOPROTEIN_PHOSPHATASE_ACTIVITY		58	0.443829	1.61751	0.0301205	0.0997856	0.99	3154	tags=29%, list=10%, signal=32%
GO_NEGATIVE_REGULATION_OF_PROTEIN_SERINE_THREONINE_KINASE_ACTIVITY	GO_NEGATIVE_REGULATION_OF_PROTEIN_SERINE_THREONINE_KINASE_ACTIVITY		125	0.365043	1.61688	0.0102041	0.100063	0.99	6077	tags=34%, list=19%, signal=41%
GO_FEMALE_GAMETE_GENERATION	GO_FEMALE_GAMETE_GENERATION		86	0.387378	1.61642	0.00998004	0.100235	0.99	5963	tags=35%, list=19%, signal=43%
GO_OVULATION_CYCLE	GO_OVULATION_CYCLE		107	0.390739	1.6164	0.0167715	0.100143	0.99	5024	tags=30%, list=16%, signal=35%
GO_PERIPHERAL_NERVOUS_SYSTEM_AXON_ENSHEATHMENT	GO_PERIPHERAL_NERVOUS_SYSTEM_AXON_ENSHEATHMENT		21	0.544283	1.6158	0.0264228	0.100483	0.99	7961	tags=52%, list=25%, signal=70%
GO_MYELINATION_IN_PERIPHERAL_NERVOUS_SYSTEM	GO_MYELINATION_IN_PERIPHERAL_NERVOUS_SYSTEM		21	0.544283	1.6158	0.0264228	0.100387	0.99	7961	tags=52%, list=25%, signal=70%
GO_REGULATION_OF_SMOOTH_MUSCLE_CELL_PROLIFERATION	GO_REGULATION_OF_SMOOTH_MUSCLE_CELL_PROLIFERATION		99	0.43146	1.61555	0.0331263	0.100488	0.99	5420	tags=35%, list=17%, signal=42%
GO_POSITIVE_REGULATION_OF_DEVELOPMENTAL_GROWTH	GO_POSITIVE_REGULATION_OF_DEVELOPMENTAL_GROWTH		149	0.377679	1.61551	0.0040404	0.100423	0.99	8311	tags=45%, list=26%, signal=61%
GO_FATTY_ACID_BINDING	GO_FATTY_ACID_BINDING		29	0.500376	1.61463	0.0426357	0.100972	0.99	4571	tags=34%, list=14%, signal=40%
GO_REGULATION_OF_LIPID_TRANSPORT	GO_REGULATION_OF_LIPID_TRANSPORT		93	0.392358	1.61427	0.0121212	0.101169	0.99	4658	tags=26%, list=15%, signal=30%
GO_MANNOSE_BINDING	GO_MANNOSE_BINDING		17	0.560726	1.61426	0.0349794	0.101076	0.99	4026	tags=47%, list=13%, signal=54%
GO_GLANDULAR_EPITHELIAL_CELL_DEVELOPMENT	GO_GLANDULAR_EPITHELIAL_CELL_DEVELOPMENT		17	0.550436	1.6138	0.0245283	0.101265	0.99	4271	tags=41%, list=13%, signal=48%
GO_FORELIMB_MORPHOGENESIS	GO_FORELIMB_MORPHOGENESIS		38	0.486919	1.61376	0.03125	0.101189	0.99	5026	tags=34%, list=16%, signal=41%
GO_REGULATION_OF_WOUND_HEALING	GO_REGULATION_OF_WOUND_HEALING		122	0.386845	1.61349	0.00788955	0.101281	0.99	4762	tags=28%, list=15%, signal=33%
GO_BIOMINERAL_TISSUE_DEVELOPMENT	GO_BIOMINERAL_TISSUE_DEVELOPMENT		67	0.415511	1.61329	0.00980392	0.101338	0.99	5454	tags=37%, list=17%, signal=45%
GO_NERVE_DEVELOPMENT	GO_NERVE_DEVELOPMENT		66	0.422879	1.61307	0.0101833	0.101444	0.99	4452	tags=27%, list=14%, signal=32%
GO_SULFUR_COMPOUND_BIOSYNTHETIC_PROCESS	GO_SULFUR_COMPOUND_BIOSYNTHETIC_PROCESS		193	0.367596	1.613	0.012474	0.101389	0.99	5988	tags=34%, list=19%, signal=41%
GO_REGULATION_OF_SMOOTH_MUSCLE_CELL_DIFFERENTIATION	GO_REGULATION_OF_SMOOTH_MUSCLE_CELL_DIFFERENTIATION		19	0.545475	1.61268	0.026	0.101517	0.99	4064	tags=37%, list=13%, signal=42%
GO_NEGATIVE_REGULATION_OF_KINASE_ACTIVITY	GO_NEGATIVE_REGULATION_OF_KINASE_ACTIVITY		243	0.336114	1.61262	0.00408998	0.10147	0.99	5412	tags=30%, list=17%, signal=35%
GO_RESPONSE_TO_NERVE_GROWTH_FACTOR	GO_RESPONSE_TO_NERVE_GROWTH_FACTOR		37	0.476844	1.61257	0.0203252	0.101418	0.99	3650	tags=35%, list=11%, signal=40%
GO_PEPTIDYL_CYSTEINE_MODIFICATION	GO_PEPTIDYL_CYSTEINE_MODIFICATION		20	0.539967	1.61237	0.0383065	0.101451	0.99	6622	tags=40%, list=21%, signal=50%
GO_ESTABLISHMENT_OF_PROTEIN_LOCALIZATION_TO_PLASMA_MEMBRANE	GO_ESTABLISHMENT_OF_PROTEIN_LOCALIZATION_TO_PLASMA_MEMBRANE		90	0.399537	1.61229	0.0212314	0.101401	0.99	3627	tags=30%, list=11%, signal=34%
GO_RAS_PROTEIN_SIGNAL_TRANSDUCTION	GO_RAS_PROTEIN_SIGNAL_TRANSDUCTION		139	0.401485	1.61103	0.0141414	0.102154	0.99	5596	tags=37%, list=18%, signal=45%
GO_NEGATIVE_REGULATION_OF_SMOOTHENED_SIGNALING_PATHWAY	GO_NEGATIVE_REGULATION_OF_SMOOTHENED_SIGNALING_PATHWAY		25	0.51522	1.61081	0.0263158	0.102225	0.99	5331	tags=40%, list=17%, signal=48%
GO_ACTIN_FILAMENT_BINDING	GO_ACTIN_FILAMENT_BINDING		115	0.393119	1.61076	0.012987	0.102164	0.99	5040	tags=34%, list=16%, signal=40%
GO_RNA_POLYMERASE_CORE_ENZYME_BINDING	GO_RNA_POLYMERASE_CORE_ENZYME_BINDING		19	0.551079	1.61051	0.0340426	0.10221	0.99	5108	tags=42%, list=16%, signal=50%
GO_ENDOPLASMIC_RETICULUM_SUBCOMPARTMENT	GO_ENDOPLASMIC_RETICULUM_SUBCOMPARTMENT		15	0.572888	1.61048	0.0245399	0.102136	0.99	2813	tags=47%, list=9%, signal=51%
GO_REGENERATION	GO_REGENERATION		153	0.385586	1.61044	0.0127119	0.102065	0.99	5816	tags=36%, list=18%, signal=44%
GO_KINASE_INHIBITOR_ACTIVITY	GO_KINASE_INHIBITOR_ACTIVITY		85	0.383902	1.61005	0.00808081	0.102221	0.99	5314	tags=32%, list=17%, signal=38%
GO_REGULATION_OF_FATTY_ACID_BETA_OXIDATION	GO_REGULATION_OF_FATTY_ACID_BETA_OXIDATION		15	0.557086	1.60976	0.0313112	0.10234	0.99	4025	tags=53%, list=13%, signal=61%
GO_NEGATIVE_REGULATION_OF_OSSIFICATION	GO_NEGATIVE_REGULATION_OF_OSSIFICATION		62	0.437825	1.60934	0.0182186	0.102498	0.99	8543	tags=52%, list=27%, signal=70%
GO_POSITIVE_REGULATION_OF_NUCLEAR_DIVISION	GO_POSITIVE_REGULATION_OF_NUCLEAR_DIVISION		56	0.440694	1.60922	0.0292276	0.10248	0.99	6368	tags=43%, list=20%, signal=54%
GO_MULTI_MULTICELLULAR_ORGANISM_PROCESS	GO_MULTI_MULTICELLULAR_ORGANISM_PROCESS		197	0.357135	1.60903	0.00402414	0.102503	0.99	4762	tags=28%, list=15%, signal=33%
GO_AMELOGENESIS	GO_AMELOGENESIS		19	0.52198	1.60884	0.0291262	0.102528	0.99	6494	tags=47%, list=20%, signal=60%
GO_NEGATIVE_REGULATION_OF_MAPK_CASCADE	GO_NEGATIVE_REGULATION_OF_MAPK_CASCADE		143	0.366279	1.60812	0.00630252	0.10292	0.99	5544	tags=30%, list=17%, signal=36%
GO_REGIONALIZATION	GO_REGIONALIZATION		295	0.34827	1.60788	0.012	0.102983	0.99	5353	tags=27%, list=17%, signal=33%
GO_MRNA_3_UTR_BINDING	GO_MRNA_3_UTR_BINDING		47	0.438551	1.60727	0.0406977	0.103333	0.991	4894	tags=36%, list=15%, signal=43%
GO_ORGANELLE_TRANSPORT_ALONG_MICROTUBULE	GO_ORGANELLE_TRANSPORT_ALONG_MICROTUBULE		54	0.494446	1.60706	0.039501	0.103365	0.991	4685	tags=43%, list=15%, signal=50%
GO_RUFFLE_MEMBRANE	GO_RUFFLE_MEMBRANE		78	0.410259	1.60644	0.0208333	0.103719	0.991	3483	tags=23%, list=11%, signal=26%
GO_NEGATIVE_REGULATION_OF_INTRACELLULAR_PROTEIN_TRANSPORT	GO_NEGATIVE_REGULATION_OF_INTRACELLULAR_PROTEIN_TRANSPORT		91	0.376516	1.60578	0.0158416	0.104101	0.991	5459	tags=32%, list=17%, signal=38%
GO_NEGATIVE_REGULATION_OF_CELLULAR_CATABOLIC_PROCESS	GO_NEGATIVE_REGULATION_OF_CELLULAR_CATABOLIC_PROCESS		148	0.3739	1.60567	0.0063425	0.104075	0.991	4658	tags=31%, list=15%, signal=36%
GO_CELLULAR_RESPONSE_TO_PROSTAGLANDIN_STIMULUS	GO_CELLULAR_RESPONSE_TO_PROSTAGLANDIN_STIMULUS		24	0.512848	1.60547	0.0314961	0.104122	0.991	7483	tags=33%, list=24%, signal=44%
GO_RESPONSE_TO_MECHANICAL_STIMULUS	GO_RESPONSE_TO_MECHANICAL_STIMULUS		206	0.356832	1.60468	0.0122449	0.104556	0.992	5161	tags=30%, list=16%, signal=35%
GO_RESPONSE_TO_EXOGENOUS_DSRNA	GO_RESPONSE_TO_EXOGENOUS_DSRNA		30	0.51415	1.60458	0.0499002	0.10453	0.992	3839	tags=43%, list=12%, signal=49%
GO_PROTEIN_COMPLEX_SCAFFOLD	GO_PROTEIN_COMPLEX_SCAFFOLD		64	0.38175	1.60386	0.00843882	0.104954	0.994	3607	tags=28%, list=11%, signal=32%
GO_NEUROMUSCULAR_JUNCTION_DEVELOPMENT	GO_NEUROMUSCULAR_JUNCTION_DEVELOPMENT		35	0.453299	1.6033	0.0138889	0.105254	0.994	2687	tags=26%, list=8%, signal=28%
GO_SIN3_TYPE_COMPLEX	GO_SIN3_TYPE_COMPLEX		16	0.575936	1.60324	0.0300601	0.105213	0.994	4010	tags=50%, list=13%, signal=57%
GO_NUCLEAR_PERIPHERY	GO_NUCLEAR_PERIPHERY		118	0.406402	1.60311	0.0524109	0.105204	0.994	8220	tags=51%, list=26%, signal=68%
GO_CYTOKINE_PRODUCTION_INVOLVED_IN_IMMUNE_RESPONSE	GO_CYTOKINE_PRODUCTION_INVOLVED_IN_IMMUNE_RESPONSE		17	0.577095	1.60267	0.0517598	0.10545	0.994	7267	tags=65%, list=23%, signal=84%
GO_NEGATIVE_REGULATION_OF_ACTIN_FILAMENT_DEPOLYMERIZATION	GO_NEGATIVE_REGULATION_OF_ACTIN_FILAMENT_DEPOLYMERIZATION		32	0.481694	1.60173	0.0323232	0.105984	0.995	4380	tags=38%, list=14%, signal=43%
GO_REGULATION_OF_SIGNAL_TRANSDUCTION_BY_P53_CLASS_MEDIATOR	GO_REGULATION_OF_SIGNAL_TRANSDUCTION_BY_P53_CLASS_MEDIATOR		156	0.40121	1.60167	0.0608519	0.105914	0.995	6220	tags=40%, list=20%, signal=50%
GO_INSULIN_RECEPTOR_BINDING	GO_INSULIN_RECEPTOR_BINDING		32	0.480776	1.60163	0.0347648	0.105852	0.995	5454	tags=47%, list=17%, signal=57%
GO_REGULATION_OF_HEART_GROWTH	GO_REGULATION_OF_HEART_GROWTH		41	0.42162	1.60161	0.00992064	0.105773	0.995	5537	tags=37%, list=17%, signal=44%
GO_ZINC_ION_HOMEOSTASIS	GO_ZINC_ION_HOMEOSTASIS		21	0.508809	1.6008	0.0224033	0.106214	0.995	8751	tags=62%, list=28%, signal=85%
GO_MACROPHAGE_DIFFERENTIATION	GO_MACROPHAGE_DIFFERENTIATION		19	0.560659	1.59997	0.0448343	0.106706	0.995	5456	tags=42%, list=17%, signal=51%
GO_POSITIVE_REGULATION_OF_HEART_GROWTH	GO_POSITIVE_REGULATION_OF_HEART_GROWTH		26	0.468769	1.59937	0.0155945	0.107025	0.995	3659	tags=35%, list=12%, signal=39%
GO_ENDOCARDIAL_CUSHION_FORMATION	GO_ENDOCARDIAL_CUSHION_FORMATION		15	0.590104	1.59817	0.0466926	0.107847	0.996	5000	tags=47%, list=16%, signal=55%
GO_POSITIVE_REGULATION_OF_STEM_CELL_PROLIFERATION	GO_POSITIVE_REGULATION_OF_STEM_CELL_PROLIFERATION		60	0.401218	1.59814	0.0077821	0.107763	0.996	4774	tags=30%, list=15%, signal=35%
GO_DEVELOPMENTAL_PIGMENTATION	GO_DEVELOPMENTAL_PIGMENTATION		36	0.455371	1.59795	0.0308008	0.107774	0.996	5496	tags=39%, list=17%, signal=47%
GO_PHOSPHATASE_BINDING	GO_PHOSPHATASE_BINDING		159	0.374553	1.59673	0.0107991	0.108567	0.996	3755	tags=28%, list=12%, signal=31%
GO_RESPONSE_TO_STEROID_HORMONE	GO_RESPONSE_TO_STEROID_HORMONE		478	0.32646	1.5965	0	0.108632	0.996	4822	tags=27%, list=15%, signal=31%
GO_REGULATION_OF_NITRIC_OXIDE_SYNTHASE_ACTIVITY	GO_REGULATION_OF_NITRIC_OXIDE_SYNTHASE_ACTIVITY		49	0.422471	1.5965	0.0201613	0.108536	0.996	3138	tags=29%, list=10%, signal=32%
GO_INCLUSION_BODY	GO_INCLUSION_BODY		66	0.407737	1.59647	0.0188285	0.108449	0.996	4528	tags=33%, list=14%, signal=39%
GO_MYELOID_LEUKOCYTE_DIFFERENTIATION	GO_MYELOID_LEUKOCYTE_DIFFERENTIATION		94	0.432168	1.59643	0.0431373	0.10838	0.996	5583	tags=34%, list=18%, signal=41%
GO_REGULATION_OF_GLUCOSE_IMPORT	GO_REGULATION_OF_GLUCOSE_IMPORT		56	0.423194	1.59635	0.0261044	0.108346	0.996	4716	tags=39%, list=15%, signal=46%
GO_ORGANOPHOSPHATE_ESTER_TRANSMEMBRANE_TRANSPORTER_ACTIVITY	GO_ORGANOPHOSPHATE_ESTER_TRANSMEMBRANE_TRANSPORTER_ACTIVITY		23	0.523014	1.59634	0.0440252	0.108255	0.996	5287	tags=48%, list=17%, signal=57%
GO_NEGATIVE_REGULATION_OF_PROTEIN_POLYMERIZATION	GO_NEGATIVE_REGULATION_OF_PROTEIN_POLYMERIZATION		52	0.422394	1.59606	0.0264766	0.10835	0.996	6332	tags=37%, list=20%, signal=46%
GO_APICAL_PART_OF_CELL	GO_APICAL_PART_OF_CELL		343	0.35285	1.59604	0.0102881	0.10827	0.996	6509	tags=34%, list=20%, signal=42%
GO_ENSHEATHMENT_OF_NEURONS	GO_ENSHEATHMENT_OF_NEURONS		87	0.410416	1.5959	0.0219124	0.108272	0.996	6537	tags=40%, list=21%, signal=51%
GO_AXON_ENSHEATHMENT	GO_AXON_ENSHEATHMENT		87	0.410416	1.5959	0.0219124	0.108175	0.996	6537	tags=40%, list=21%, signal=51%
GO_CYTOPLASMIC_STRESS_GRANULE	GO_CYTOPLASMIC_STRESS_GRANULE		30	0.527915	1.59522	0.0412371	0.108538	0.996	3673	tags=47%, list=12%, signal=53%
GO_POSITIVE_REGULATION_OF_PROTEOLYSIS	GO_POSITIVE_REGULATION_OF_PROTEOLYSIS		351	0.376053	1.5944	0.0314465	0.109058	0.996	5752	tags=32%, list=18%, signal=39%
GO_PROTEIN_K48_LINKED_UBIQUITINATION	GO_PROTEIN_K48_LINKED_UBIQUITINATION		46	0.467252	1.59418	0.040568	0.109083	0.996	3746	tags=35%, list=12%, signal=39%
GO_REGULATION_OF_CELL_CYCLE_G2_M_PHASE_TRANSITION	GO_REGULATION_OF_CELL_CYCLE_G2_M_PHASE_TRANSITION		57	0.442326	1.59393	0.0491453	0.109154	0.996	6415	tags=53%, list=20%, signal=66%
GO_REGULATION_OF_RESPONSE_TO_NUTRIENT_LEVELS	GO_REGULATION_OF_RESPONSE_TO_NUTRIENT_LEVELS		167	0.383026	1.59337	0.0220884	0.109461	0.996	7483	tags=43%, list=24%, signal=56%
GO_REGULATION_OF_RESPONSE_TO_EXTRACELLULAR_STIMULUS	GO_REGULATION_OF_RESPONSE_TO_EXTRACELLULAR_STIMULUS		167	0.383026	1.59337	0.0220884	0.109363	0.996	7483	tags=43%, list=24%, signal=56%
GO_RESPONSE_TO_INORGANIC_SUBSTANCE	GO_RESPONSE_TO_INORGANIC_SUBSTANCE		465	0.329959	1.59332	0	0.109313	0.996	5761	tags=30%, list=18%, signal=36%
GO_INOSITOL_LIPID_MEDIATED_SIGNALING	GO_INOSITOL_LIPID_MEDIATED_SIGNALING		115	0.398019	1.59327	0.0185567	0.109244	0.996	5750	tags=37%, list=18%, signal=44%
GO_PYRIMIDINE_NUCLEOBASE_METABOLIC_PROCESS	GO_PYRIMIDINE_NUCLEOBASE_METABOLIC_PROCESS		19	0.546988	1.5932	0.0430328	0.109217	0.996	4945	tags=42%, list=16%, signal=50%
GO_MACROAUTOPHAGY	GO_MACROAUTOPHAGY		260	0.358845	1.59287	0	0.109329	0.996	5761	tags=34%, list=18%, signal=41%
GO_REGULATION_OF_CELLULAR_AMIDE_METABOLIC_PROCESS	GO_REGULATION_OF_CELLULAR_AMIDE_METABOLIC_PROCESS		319	0.365322	1.59208	0.0328542	0.109769	0.996	5359	tags=34%, list=17%, signal=40%
GO_CELL_SURFACE_RECEPTOR_SIGNALING_PATHWAY_INVOLVED_IN_HEART_DEVELOPMENT	GO_CELL_SURFACE_RECEPTOR_SIGNALING_PATHWAY_INVOLVED_IN_HEART_DEVELOPMENT		15	0.592866	1.59141	0.0477178	0.110175	0.996	7469	tags=53%, list=24%, signal=70%
GO_ACTIVATING_TRANSCRIPTION_FACTOR_BINDING	GO_ACTIVATING_TRANSCRIPTION_FACTOR_BINDING		57	0.416831	1.59084	0.0244898	0.11049	0.996	4114	tags=28%, list=13%, signal=32%
GO_REGULATION_OF_NEURON_PROJECTION_DEVELOPMENT	GO_REGULATION_OF_NEURON_PROJECTION_DEVELOPMENT		395	0.374249	1.59058	0.0226804	0.11057	0.996	6957	tags=36%, list=22%, signal=46%
GO_REGULATION_OF_OSTEOBLAST_PROLIFERATION	GO_REGULATION_OF_OSTEOBLAST_PROLIFERATION		22	0.516899	1.5899	0.0335306	0.110967	0.996	2837	tags=36%, list=9%, signal=40%
GO_TRANSCRIPTION_FACTOR_BINDING	GO_TRANSCRIPTION_FACTOR_BINDING		494	0.330065	1.58974	0.018	0.110957	0.996	4829	tags=27%, list=15%, signal=32%
GO_MITOTIC_DNA_INTEGRITY_CHECKPOINT	GO_MITOTIC_DNA_INTEGRITY_CHECKPOINT		93	0.437812	1.58972	0.08159	0.110869	0.996	6562	tags=48%, list=21%, signal=61%
GO_COATED_PIT	GO_COATED_PIT		65	0.400305	1.58971	0.0193133	0.110771	0.996	4914	tags=34%, list=15%, signal=40%
GO_IONOTROPIC_GLUTAMATE_RECEPTOR_BINDING	GO_IONOTROPIC_GLUTAMATE_RECEPTOR_BINDING		23	0.512979	1.58959	0.0338645	0.11077	0.996	1764	tags=30%, list=6%, signal=32%
GO_NEGATIVE_REGULATION_OF_INTRACELLULAR_SIGNAL_TRANSDUCTION	GO_NEGATIVE_REGULATION_OF_INTRACELLULAR_SIGNAL_TRANSDUCTION		418	0.329838	1.58919	0.0102249	0.11098	0.997	5459	tags=27%, list=17%, signal=32%
GO_SKIN_EPIDERMIS_DEVELOPMENT	GO_SKIN_EPIDERMIS_DEVELOPMENT		67	0.401752	1.58847	0.014	0.111367	0.997	5743	tags=34%, list=18%, signal=42%
GO_ENDOSOMAL_PART	GO_ENDOSOMAL_PART		407	0.359382	1.5883	0.0125786	0.111388	0.997	7086	tags=41%, list=22%, signal=52%
GO_ENDOCYTIC_VESICLE_MEMBRANE	GO_ENDOCYTIC_VESICLE_MEMBRANE		149	0.393049	1.5873	0.0352697	0.111987	0.997	5496	tags=34%, list=17%, signal=40%
GO_POSITIVE_REGULATION_OF_CHEMOKINE_PRODUCTION	GO_POSITIVE_REGULATION_OF_CHEMOKINE_PRODUCTION		49	0.463154	1.58668	0.0345528	0.112349	0.997	4652	tags=37%, list=15%, signal=43%
GO_REGULATION_OF_ACTIN_FILAMENT_BASED_MOVEMENT	GO_REGULATION_OF_ACTIN_FILAMENT_BASED_MOVEMENT		32	0.474693	1.5866	0.0382979	0.112329	0.997	6520	tags=50%, list=21%, signal=63%
GO_NEGATIVE_REGULATION_OF_DEFENSE_RESPONSE_TO_VIRUS	GO_NEGATIVE_REGULATION_OF_DEFENSE_RESPONSE_TO_VIRUS		17	0.560885	1.58608	0.0451745	0.112599	0.997	3639	tags=41%, list=11%, signal=46%
GO_ATP_DEPENDENT_DNA_HELICASE_ACTIVITY	GO_ATP_DEPENDENT_DNA_HELICASE_ACTIVITY		33	0.527258	1.58533	0.0907173	0.113022	0.997	4694	tags=48%, list=15%, signal=57%
GO_OXIDOREDUCTASE_ACTIVITY_ACTING_ON_THE_ALDEHYDE_OR_OXO_GROUP_OF_DONORS_NAD_OR_NADP_AS_ACCEPTOR	GO_OXIDOREDUCTASE_ACTIVITY_ACTING_ON_THE_ALDEHYDE_OR_OXO_GROUP_OF_DONORS_NAD_OR_NADP_AS_ACCEPTOR		33	0.51086	1.58527	0.057377	0.11296	0.997	5927	tags=42%, list=19%, signal=52%
GO_RETROGRADE_VESICLE_MEDIATED_TRANSPORT_GOLGI_TO_ER	GO_RETROGRADE_VESICLE_MEDIATED_TRANSPORT_GOLGI_TO_ER		75	0.501873	1.58485	0.0738523	0.113136	0.997	4897	tags=43%, list=15%, signal=50%
GO_RESPONSE_TO_GAMMA_RADIATION	GO_RESPONSE_TO_GAMMA_RADIATION		49	0.478913	1.58471	0.0391753	0.113143	0.997	8536	tags=43%, list=27%, signal=59%
GO_REGULATION_OF_RESPONSE_TO_BIOTIC_STIMULUS	GO_REGULATION_OF_RESPONSE_TO_BIOTIC_STIMULUS		222	0.367129	1.5847	0.0203666	0.113053	0.997	7814	tags=41%, list=25%, signal=55%
GO_REGULATION_OF_FIBROBLAST_GROWTH_FACTOR_RECEPTOR_SIGNALING_PATHWAY	GO_REGULATION_OF_FIBROBLAST_GROWTH_FACTOR_RECEPTOR_SIGNALING_PATHWAY		23	0.513975	1.58403	0.0446809	0.113449	0.997	5700	tags=52%, list=18%, signal=64%
GO_NEGATIVE_REGULATION_OF_INTRACELLULAR_TRANSPORT	GO_NEGATIVE_REGULATION_OF_INTRACELLULAR_TRANSPORT		135	0.370346	1.58372	0.0177515	0.113564	0.997	5459	tags=30%, list=17%, signal=37%
GO_PLATELET_ALPHA_GRANULE	GO_PLATELET_ALPHA_GRANULE		74	0.458833	1.58292	0.0452675	0.114034	0.997	3424	tags=30%, list=11%, signal=33%
GO_MICROTUBULE	GO_MICROTUBULE		381	0.362924	1.58282	0.0257426	0.113997	0.997	5845	tags=35%, list=18%, signal=42%
GO_ACTIN_BASED_CELL_PROJECTION	GO_ACTIN_BASED_CELL_PROJECTION		171	0.356555	1.58245	0.0125786	0.114187	0.997	4470	tags=25%, list=14%, signal=29%
GO_PHOSPHOPROTEIN_PHOSPHATASE_ACTIVITY	GO_PHOSPHOPROTEIN_PHOSPHATASE_ACTIVITY		168	0.37079	1.58245	0.0230126	0.114088	0.997	6103	tags=35%, list=19%, signal=43%
GO_BLASTOCYST_DEVELOPMENT	GO_BLASTOCYST_DEVELOPMENT		58	0.453313	1.58224	0.0506329	0.11415	0.997	5849	tags=45%, list=18%, signal=55%
GO_EXTRINSIC_COMPONENT_OF_CYTOPLASMIC_SIDE_OF_PLASMA_MEMBRANE	GO_EXTRINSIC_COMPONENT_OF_CYTOPLASMIC_SIDE_OF_PLASMA_MEMBRANE		96	0.411812	1.58195	0.0333333	0.114279	0.997	3267	tags=23%, list=10%, signal=25%
GO_LATE_ENDOSOME	GO_LATE_ENDOSOME		199	0.377489	1.58159	0.0252101	0.114449	0.997	5711	tags=35%, list=18%, signal=42%
GO_ENHANCER_BINDING	GO_ENHANCER_BINDING		89	0.379468	1.58127	0.0341365	0.114624	0.997	6719	tags=38%, list=21%, signal=48%
GO_POSITIVE_REGULATION_OF_PHOSPHOLIPID_METABOLIC_PROCESS	GO_POSITIVE_REGULATION_OF_PHOSPHOLIPID_METABOLIC_PROCESS		39	0.471914	1.58051	0.0360721	0.115155	0.997	6644	tags=41%, list=21%, signal=52%
GO_DNA_HELICASE_ACTIVITY	GO_DNA_HELICASE_ACTIVITY		51	0.518801	1.58035	0.0943396	0.115171	0.997	5364	tags=47%, list=17%, signal=57%
GO_REGULATION_OF_TRANSCRIPTION_FACTOR_IMPORT_INTO_NUCLEUS	GO_REGULATION_OF_TRANSCRIPTION_FACTOR_IMPORT_INTO_NUCLEUS		92	0.379237	1.58012	0.0196464	0.115251	0.997	5459	tags=34%, list=17%, signal=41%
GO_REGULATION_OF_MUSCLE_SYSTEM_PROCESS	GO_REGULATION_OF_MUSCLE_SYSTEM_PROCESS		190	0.383075	1.57982	0.0164609	0.115381	0.997	6520	tags=39%, list=21%, signal=49%
GO_NEGATIVE_REGULATION_OF_CELLULAR_PROTEIN_CATABOLIC_PROCESS	GO_NEGATIVE_REGULATION_OF_CELLULAR_PROTEIN_CATABOLIC_PROCESS		60	0.450025	1.5797	0.0639175	0.115384	0.997	4528	tags=35%, list=14%, signal=41%
GO_REGULATION_OF_FAT_CELL_DIFFERENTIATION	GO_REGULATION_OF_FAT_CELL_DIFFERENTIATION		98	0.382576	1.57929	0.01417	0.115577	0.997	7913	tags=40%, list=25%, signal=53%
GO_REGULATION_OF_SMALL_GTPASE_MEDIATED_SIGNAL_TRANSDUCTION	GO_REGULATION_OF_SMALL_GTPASE_MEDIATED_SIGNAL_TRANSDUCTION		273	0.361695	1.57926	0.018595	0.115505	0.997	6083	tags=36%, list=19%, signal=44%
GO_E_BOX_BINDING	GO_E_BOX_BINDING		26	0.482449	1.57844	0.0313808	0.116055	0.997	4111	tags=35%, list=13%, signal=40%
GO_TRANS_GOLGI_NETWORK_MEMBRANE	GO_TRANS_GOLGI_NETWORK_MEMBRANE		75	0.396172	1.5784	0.0310559	0.115968	0.997	5211	tags=33%, list=16%, signal=40%
GO_NUCLEOTIDE_TRANSMEMBRANE_TRANSPORTER_ACTIVITY	GO_NUCLEOTIDE_TRANSMEMBRANE_TRANSPORTER_ACTIVITY		19	0.535556	1.57828	0.0569106	0.115949	0.997	5287	tags=47%, list=17%, signal=57%
GO_REGULATION_OF_FILOPODIUM_ASSEMBLY	GO_REGULATION_OF_FILOPODIUM_ASSEMBLY		34	0.468264	1.57759	0.0253411	0.116369	0.998	4290	tags=29%, list=14%, signal=34%
GO_REGULATION_OF_MUSCLE_ORGAN_DEVELOPMENT	GO_REGULATION_OF_MUSCLE_ORGAN_DEVELOPMENT		95	0.372633	1.57739	0.0144033	0.116411	0.998	8311	tags=48%, list=26%, signal=65%
GO_ESTABLISHMENT_OF_ENDOTHELIAL_BARRIER	GO_ESTABLISHMENT_OF_ENDOTHELIAL_BARRIER		29	0.517014	1.57735	0.0448343	0.116347	0.998	2531	tags=28%, list=8%, signal=30%
GO_REGULATION_OF_NIK_NF_KAPPAB_SIGNALING	GO_REGULATION_OF_NIK_NF_KAPPAB_SIGNALING		41	0.512919	1.57731	0.0496032	0.116286	0.998	6109	tags=49%, list=19%, signal=60%
GO_REGULATION_OF_MUSCLE_TISSUE_DEVELOPMENT	GO_REGULATION_OF_MUSCLE_TISSUE_DEVELOPMENT		95	0.370973	1.57721	0.0163265	0.116244	0.998	8311	tags=48%, list=26%, signal=65%
GO_REGULATION_OF_COFACTOR_METABOLIC_PROCESS	GO_REGULATION_OF_COFACTOR_METABOLIC_PROCESS		46	0.451188	1.57721	0.025641	0.116147	0.998	4385	tags=39%, list=14%, signal=45%
GO_REGULATION_OF_COENZYME_METABOLIC_PROCESS	GO_REGULATION_OF_COENZYME_METABOLIC_PROCESS		46	0.451188	1.57721	0.025641	0.116048	0.998	4385	tags=39%, list=14%, signal=45%
GO_CELLULAR_RESPONSE_TO_INORGANIC_SUBSTANCE	GO_CELLULAR_RESPONSE_TO_INORGANIC_SUBSTANCE		148	0.351993	1.57659	0	0.11644	0.998	6184	tags=34%, list=19%, signal=42%
GO_CELLULAR_SENESCENCE	GO_CELLULAR_SENESCENCE		31	0.459959	1.57624	0.0416667	0.116608	0.998	8949	tags=55%, list=28%, signal=76%
GO_ACTOMYOSIN_STRUCTURE_ORGANIZATION	GO_ACTOMYOSIN_STRUCTURE_ORGANIZATION		72	0.428882	1.57607	0.0480962	0.116627	0.998	4669	tags=35%, list=15%, signal=41%
GO_PHOSPHOPROTEIN_BINDING	GO_PHOSPHOPROTEIN_BINDING		59	0.415822	1.57547	0.0292887	0.116979	0.998	5357	tags=39%, list=17%, signal=47%
GO_NEGATIVE_REGULATION_OF_LIPASE_ACTIVITY	GO_NEGATIVE_REGULATION_OF_LIPASE_ACTIVITY		15	0.576096	1.57501	0.041841	0.117157	0.998	4658	tags=53%, list=15%, signal=62%
GO_NUCLEOSIDE_TRIPHOSPHATASE_REGULATOR_ACTIVITY	GO_NUCLEOSIDE_TRIPHOSPHATASE_REGULATOR_ACTIVITY		314	0.323775	1.57489	0.0125	0.117149	0.998	3799	tags=26%, list=12%, signal=30%
GO_MANGANESE_ION_BINDING	GO_MANGANESE_ION_BINDING		44	0.432597	1.57476	0.0244399	0.117148	0.998	7457	tags=50%, list=23%, signal=65%
GO_ANATOMICAL_STRUCTURE_HOMEOSTASIS	GO_ANATOMICAL_STRUCTURE_HOMEOSTASIS		264	0.331918	1.57462	0.00650759	0.117155	0.998	8628	tags=43%, list=27%, signal=58%
GO_RESPONSE_TO_ALCOHOL	GO_RESPONSE_TO_ALCOHOL		352	0.338252	1.57428	0.00814664	0.117312	0.998	5537	tags=28%, list=17%, signal=33%
GO_CELLULAR_CARBOHYDRATE_BIOSYNTHETIC_PROCESS	GO_CELLULAR_CARBOHYDRATE_BIOSYNTHETIC_PROCESS		49	0.432381	1.57385	0.02	0.117505	0.998	5024	tags=33%, list=16%, signal=39%
GO_CENTROSOME_CYCLE	GO_CENTROSOME_CYCLE		44	0.488539	1.57382	0.0873181	0.117442	0.998	7273	tags=61%, list=23%, signal=79%
GO_NEGATIVE_REGULATION_OF_MYELOID_CELL_DIFFERENTIATION	GO_NEGATIVE_REGULATION_OF_MYELOID_CELL_DIFFERENTIATION		79	0.388432	1.5733	0.0140845	0.117742	0.998	4518	tags=25%, list=14%, signal=29%
GO_HORMONE_RECEPTOR_BINDING	GO_HORMONE_RECEPTOR_BINDING		147	0.357769	1.57307	0.0233546	0.117823	0.998	5420	tags=33%, list=17%, signal=39%
GO_MICROTUBULE_CYTOSKELETON_ORGANIZATION_INVOLVED_IN_MITOSIS	GO_MICROTUBULE_CYTOSKELETON_ORGANIZATION_INVOLVED_IN_MITOSIS		39	0.511287	1.57257	0.0811359	0.118103	0.998	5773	tags=51%, list=18%, signal=63%
GO_MITOTIC_SPINDLE_ASSEMBLY	GO_MITOTIC_SPINDLE_ASSEMBLY		39	0.511287	1.57257	0.0811359	0.118003	0.998	5773	tags=51%, list=18%, signal=63%
GO_BINDING_BRIDGING	GO_BINDING_BRIDGING		172	0.34923	1.57129	0.016129	0.11887	0.998	4388	tags=29%, list=14%, signal=34%
GO_REPRESSING_TRANSCRIPTION_FACTOR_BINDING	GO_REPRESSING_TRANSCRIPTION_FACTOR_BINDING		55	0.397432	1.57087	0.0298211	0.119101	0.998	4107	tags=29%, list=13%, signal=33%
GO_CARDIAC_CELL_DEVELOPMENT	GO_CARDIAC_CELL_DEVELOPMENT		46	0.451216	1.57044	0.0246914	0.119351	0.998	6015	tags=41%, list=19%, signal=51%
GO_CELLULAR_TRANSITION_METAL_ION_HOMEOSTASIS	GO_CELLULAR_TRANSITION_METAL_ION_HOMEOSTASIS		73	0.406608	1.57026	0.0187891	0.11939	0.998	5904	tags=37%, list=19%, signal=45%
GO_REGULATION_OF_MUSCLE_HYPERTROPHY	GO_REGULATION_OF_MUSCLE_HYPERTROPHY		36	0.440811	1.56962	0.030303	0.119766	0.998	4600	tags=36%, list=14%, signal=42%
GO_TRANSCRIPTIONAL_ACTIVATOR_ACTIVITY_RNA_POLYMERASE_II_TRANSCRIPTION_REGULATORY_REGION_SEQUENCE_SPECIFIC_BINDING	GO_TRANSCRIPTIONAL_ACTIVATOR_ACTIVITY_RNA_POLYMERASE_II_TRANSCRIPTION_REGULATORY_REGION_SEQUENCE_SPECIFIC_BINDING		294	0.345654	1.56879	0.0127389	0.120252	0.998	4422	tags=26%, list=14%, signal=29%
GO_POSITIVE_REGULATION_OF_NEURON_PROJECTION_DEVELOPMENT	GO_POSITIVE_REGULATION_OF_NEURON_PROJECTION_DEVELOPMENT		227	0.389003	1.56843	0.0293501	0.120432	0.998	5415	tags=32%, list=17%, signal=38%
GO_EPITHELIAL_TUBE_BRANCHING_INVOLVED_IN_LUNG_MORPHOGENESIS	GO_EPITHELIAL_TUBE_BRANCHING_INVOLVED_IN_LUNG_MORPHOGENESIS		25	0.544492	1.56812	0.0465587	0.120545	0.998	4100	tags=40%, list=13%, signal=46%
GO_CHROMATIN	GO_CHROMATIN		401	0.367672	1.56797	0.0420168	0.120546	0.998	6775	tags=38%, list=21%, signal=47%
GO_REGULATION_OF_STRIATED_MUSCLE_CELL_DIFFERENTIATION	GO_REGULATION_OF_STRIATED_MUSCLE_CELL_DIFFERENTIATION		77	0.391324	1.56785	0.0194805	0.120558	0.998	4051	tags=23%, list=13%, signal=27%
GO_SULFUR_COMPOUND_BINDING	GO_SULFUR_COMPOUND_BINDING		227	0.362648	1.56777	0.0103734	0.120505	0.998	7064	tags=37%, list=22%, signal=47%
GO_GLYCOSPHINGOLIPID_BIOSYNTHETIC_PROCESS	GO_GLYCOSPHINGOLIPID_BIOSYNTHETIC_PROCESS		23	0.498574	1.56656	0.0400802	0.121361	0.998	7607	tags=57%, list=24%, signal=74%
GO_PROTEIN_SERINE_THREONINE_KINASE_ACTIVITY	GO_PROTEIN_SERINE_THREONINE_KINASE_ACTIVITY		424	0.333643	1.56581	0.0166667	0.121809	0.999	4397	tags=29%, list=14%, signal=33%
GO_RAC_PROTEIN_SIGNAL_TRANSDUCTION	GO_RAC_PROTEIN_SIGNAL_TRANSDUCTION		18	0.530393	1.5657	0.0523139	0.121784	0.999	2481	tags=33%, list=8%, signal=36%
GO_MEMBRANE_BUDDING	GO_MEMBRANE_BUDDING		111	0.432779	1.56561	0.0410678	0.121749	0.999	5019	tags=39%, list=16%, signal=46%
GO_REGULATION_OF_CELL_SIZE	GO_REGULATION_OF_CELL_SIZE		166	0.364937	1.56561	0.0159681	0.121652	0.999	3804	tags=24%, list=12%, signal=27%
GO_OVULATION_CYCLE_PROCESS	GO_OVULATION_CYCLE_PROCESS		82	0.386261	1.56505	0.0297872	0.121946	0.999	4835	tags=28%, list=15%, signal=33%
GO_MORPHOGENESIS_OF_AN_EPITHELIAL_FOLD	GO_MORPHOGENESIS_OF_AN_EPITHELIAL_FOLD		15	0.549861	1.56491	0.0325671	0.121959	0.999	5772	tags=53%, list=18%, signal=65%
GO_O_GLYCAN_PROCESSING	GO_O_GLYCAN_PROCESSING		56	0.476304	1.56474	0.0511727	0.121996	0.999	7206	tags=45%, list=23%, signal=58%
GO_NEGATIVE_REGULATION_OF_ENDOTHELIAL_CELL_MIGRATION	GO_NEGATIVE_REGULATION_OF_ENDOTHELIAL_CELL_MIGRATION		35	0.478703	1.5646	0.0530612	0.122026	0.999	3946	tags=34%, list=12%, signal=39%
GO_NEGATIVE_REGULATION_OF_SIGNAL_TRANSDUCTION_BY_P53_CLASS_MEDIATOR	GO_NEGATIVE_REGULATION_OF_SIGNAL_TRANSDUCTION_BY_P53_CLASS_MEDIATOR		27	0.472432	1.56459	0.0345528	0.121929	0.999	8271	tags=56%, list=26%, signal=75%
GO_CELLULAR_RESPONSE_TO_EPIDERMAL_GROWTH_FACTOR_STIMULUS	GO_CELLULAR_RESPONSE_TO_EPIDERMAL_GROWTH_FACTOR_STIMULUS		23	0.492811	1.56421	0.0359408	0.122125	0.999	3703	tags=35%, list=12%, signal=39%
GO_LUNG_MORPHOGENESIS	GO_LUNG_MORPHOGENESIS		45	0.474604	1.5639	0.0503145	0.122277	0.999	4111	tags=38%, list=13%, signal=43%
GO_POSITIVE_REGULATION_OF_SMOOTH_MUSCLE_CONTRACTION	GO_POSITIVE_REGULATION_OF_SMOOTH_MUSCLE_CONTRACTION		29	0.49368	1.56319	0.0517928	0.122688	0.999	5532	tags=38%, list=17%, signal=46%
GO_PERIPHERAL_NERVOUS_SYSTEM_DEVELOPMENT	GO_PERIPHERAL_NERVOUS_SYSTEM_DEVELOPMENT		64	0.418043	1.5629	0.0281125	0.122832	0.999	6537	tags=34%, list=21%, signal=43%
GO_METAPHASE_PLATE_CONGRESSION	GO_METAPHASE_PLATE_CONGRESSION		41	0.557098	1.56246	0.075	0.123061	0.999	5664	tags=63%, list=18%, signal=77%
GO_NEGATIVE_REGULATION_OF_BIOMINERAL_TISSUE_DEVELOPMENT	GO_NEGATIVE_REGULATION_OF_BIOMINERAL_TISSUE_DEVELOPMENT		16	0.545548	1.5616	0.0543933	0.12358	0.999	5407	tags=44%, list=17%, signal=53%
GO_H4_HISTONE_ACETYLTRANSFERASE_COMPLEX	GO_H4_HISTONE_ACETYLTRANSFERASE_COMPLEX		18	0.52389	1.56141	0.0518962	0.123628	0.999	8553	tags=61%, list=27%, signal=84%
GO_METANEPHRIC_NEPHRON_DEVELOPMENT	GO_METANEPHRIC_NEPHRON_DEVELOPMENT		32	0.474809	1.56134	0.0243902	0.123588	0.999	2745	tags=28%, list=9%, signal=31%
GO_FC_EPSILON_RECEPTOR_SIGNALING_PATHWAY	GO_FC_EPSILON_RECEPTOR_SIGNALING_PATHWAY		139	0.435175	1.56123	0.0693069	0.123565	0.999	5478	tags=35%, list=17%, signal=42%
GO_TRANSITION_METAL_ION_HOMEOSTASIS	GO_TRANSITION_METAL_ION_HOMEOSTASIS		101	0.377099	1.56081	0.00826446	0.123772	0.999	6017	tags=35%, list=19%, signal=43%
GO_PML_BODY	GO_PML_BODY		92	0.407698	1.56056	0.0538302	0.123863	0.999	4367	tags=35%, list=14%, signal=40%
GO_I_BAND	GO_I_BAND		118	0.417212	1.5603	0.0670611	0.123964	0.999	6015	tags=36%, list=19%, signal=45%
GO_REGULATION_OF_GLUCOSE_TRANSPORT	GO_REGULATION_OF_GLUCOSE_TRANSPORT		93	0.388067	1.55943	0.0361702	0.124529	0.999	4716	tags=34%, list=15%, signal=40%
GO_PROTEIN_C_TERMINUS_BINDING	GO_PROTEIN_C_TERMINUS_BINDING		182	0.351092	1.55902	0.0083682	0.124722	0.999	6740	tags=37%, list=21%, signal=46%
GO_ENERGY_RESERVE_METABOLIC_PROCESS	GO_ENERGY_RESERVE_METABOLIC_PROCESS		69	0.411756	1.55892	0.0203666	0.124708	0.999	5013	tags=33%, list=16%, signal=39%
GO_JAK_STAT_CASCADE	GO_JAK_STAT_CASCADE		44	0.467087	1.55857	0.0747475	0.124889	0.999	3344	tags=30%, list=11%, signal=33%
GO_STAT_CASCADE	GO_STAT_CASCADE		44	0.467087	1.55857	0.0747475	0.124787	0.999	3344	tags=30%, list=11%, signal=33%
GO_SKIN_DEVELOPMENT	GO_SKIN_DEVELOPMENT		184	0.382122	1.55783	0.0364372	0.125242	0.999	2588	tags=20%, list=8%, signal=21%
GO_MONOCYTE_DIFFERENTIATION	GO_MONOCYTE_DIFFERENTIATION		16	0.543307	1.55772	0.0482897	0.125216	0.999	4029	tags=31%, list=13%, signal=36%
GO_REGULATION_OF_TELOMERE_CAPPING	GO_REGULATION_OF_TELOMERE_CAPPING		21	0.507941	1.55763	0.0658683	0.12518	0.999	5094	tags=43%, list=16%, signal=51%
GO_BLASTOCYST_FORMATION	GO_BLASTOCYST_FORMATION		28	0.484497	1.5575	0.0509554	0.125185	0.999	2350	tags=32%, list=7%, signal=35%
GO_SCF_DEPENDENT_PROTEASOMAL_UBIQUITIN_DEPENDENT_PROTEIN_CATABOLIC_PROCESS	GO_SCF_DEPENDENT_PROTEASOMAL_UBIQUITIN_DEPENDENT_PROTEIN_CATABOLIC_PROCESS		23	0.491432	1.55741	0.0494071	0.125141	0.999	4648	tags=43%, list=15%, signal=51%
GO_RNA_POLYMERASE_II_DISTAL_ENHANCER_SEQUENCE_SPECIFIC_DNA_BINDING	GO_RNA_POLYMERASE_II_DISTAL_ENHANCER_SEQUENCE_SPECIFIC_DNA_BINDING		62	0.405205	1.55725	0.0321932	0.125177	0.999	3540	tags=27%, list=11%, signal=31%
GO_AUTONOMIC_NERVOUS_SYSTEM_DEVELOPMENT	GO_AUTONOMIC_NERVOUS_SYSTEM_DEVELOPMENT		39	0.473344	1.55715	0.0329218	0.125153	0.999	5254	tags=38%, list=17%, signal=46%
GO_ATP_DEPENDENT_CHROMATIN_REMODELING	GO_ATP_DEPENDENT_CHROMATIN_REMODELING		63	0.476263	1.557	0.0914634	0.125147	0.999	6713	tags=49%, list=21%, signal=62%
GO_BONE_CELL_DEVELOPMENT	GO_BONE_CELL_DEVELOPMENT		22	0.529027	1.55677	0.0623742	0.125208	0.999	7301	tags=55%, list=23%, signal=71%
GO_NEGATIVE_REGULATION_OF_CELL_PROJECTION_ORGANIZATION	GO_NEGATIVE_REGULATION_OF_CELL_PROJECTION_ORGANIZATION		140	0.364575	1.55639	0.0220884	0.125413	0.999	4528	tags=25%, list=14%, signal=29%
GO_POSITIVE_REGULATION_OF_ADHERENS_JUNCTION_ORGANIZATION	GO_POSITIVE_REGULATION_OF_ADHERENS_JUNCTION_ORGANIZATION		21	0.476695	1.55637	0.028866	0.125322	0.999	2378	tags=24%, list=7%, signal=26%
GO_PROTEIN_TYROSINE_KINASE_ACTIVITY	GO_PROTEIN_TYROSINE_KINASE_ACTIVITY		173	0.35481	1.5563	0.0124224	0.125269	0.999	4808	tags=30%, list=15%, signal=35%
GO_NEGATIVE_REGULATION_OF_ALPHA_BETA_T_CELL_DIFFERENTIATION	GO_NEGATIVE_REGULATION_OF_ALPHA_BETA_T_CELL_DIFFERENTIATION		15	0.582957	1.55602	0.0357143	0.125412	0.999	869	tags=27%, list=3%, signal=27%
GO_RESPONSE_TO_LIGHT_STIMULUS	GO_RESPONSE_TO_LIGHT_STIMULUS		262	0.323804	1.55579	0.0183299	0.125474	0.999	7562	tags=40%, list=24%, signal=52%
GO_OXIDOREDUCTASE_ACTIVITY_ACTING_ON_PAIRED_DONORS_WITH_INCORPORATION_OR_REDUCTION_OF_MOLECULAR_OXYGEN_2_OXOGLUTARATE_AS_ONE_DONOR_AND_INCORPORATION_OF_ONE_ATOM_EACH_OF_OXYGEN_INTO_BOTH_DONORS	GO_OXIDOREDUCTASE_ACTIVITY_ACTING_ON_PAIRED_DONORS_WITH_INCORPORATION_OR_REDUCTION_OF_MOLECULAR_OXYGEN_2_OXOGLUTARATE_AS_ONE_DONOR_AND_INCORPORATION_OF_ONE_ATOM_EACH_OF_OXYGEN_INTO_BOTH_DONORS		39	0.456907	1.55572	0.037422	0.125434	0.999	7010	tags=49%, list=22%, signal=62%
GO_ORGANELLE_ASSEMBLY	GO_ORGANELLE_ASSEMBLY		451	0.338624	1.55552	0.0366599	0.125467	0.999	6118	tags=37%, list=19%, signal=45%
GO_LIGASE_ACTIVITY	GO_LIGASE_ACTIVITY		377	0.359795	1.55543	0.0245902	0.125433	0.999	5982	tags=36%, list=19%, signal=44%
GO_PROTEIN_OLIGOMERIZATION	GO_PROTEIN_OLIGOMERIZATION		410	0.318781	1.55532	0	0.125426	0.999	5968	tags=30%, list=19%, signal=36%
GO_CUL3_RING_UBIQUITIN_LIGASE_COMPLEX	GO_CUL3_RING_UBIQUITIN_LIGASE_COMPLEX		59	0.414613	1.55406	0.021611	0.126336	0.999	3112	tags=29%, list=10%, signal=32%
GO_STEROID_HORMONE_MEDIATED_SIGNALING_PATHWAY	GO_STEROID_HORMONE_MEDIATED_SIGNALING_PATHWAY		120	0.37093	1.55387	0.0336134	0.126373	0.999	5420	tags=35%, list=17%, signal=42%
GO_LEADING_EDGE_MEMBRANE	GO_LEADING_EDGE_MEMBRANE		129	0.372694	1.55349	0.0248963	0.126565	0.999	4936	tags=28%, list=16%, signal=33%
GO_MITOTIC_SISTER_CHROMATID_SEGREGATION	GO_MITOTIC_SISTER_CHROMATID_SEGREGATION		88	0.504827	1.5533	0.113169	0.126613	0.999	6036	tags=57%, list=19%, signal=70%
GO_REGULATION_OF_ACTIN_NUCLEATION	GO_REGULATION_OF_ACTIN_NUCLEATION		26	0.467231	1.55325	0.0489362	0.126545	0.999	4380	tags=38%, list=14%, signal=45%
GO_INTRAMOLECULAR_TRANSFERASE_ACTIVITY	GO_INTRAMOLECULAR_TRANSFERASE_ACTIVITY		26	0.496436	1.55301	0.0605428	0.12663	0.999	5638	tags=38%, list=18%, signal=47%
GO_CELLULAR_GLUCAN_METABOLIC_PROCESS	GO_CELLULAR_GLUCAN_METABOLIC_PROCESS		57	0.418976	1.55254	0.0313112	0.126935	0.999	5015	tags=35%, list=16%, signal=42%
GO_GLUCAN_METABOLIC_PROCESS	GO_GLUCAN_METABOLIC_PROCESS		57	0.418976	1.55254	0.0313112	0.126833	0.999	5015	tags=35%, list=16%, signal=42%
GO_PROTEIN_LOCALIZATION_TO_GOLGI_APPARATUS	GO_PROTEIN_LOCALIZATION_TO_GOLGI_APPARATUS		30	0.500946	1.55189	0.0675105	0.127219	0.999	4133	tags=40%, list=13%, signal=46%
GO_RESPONSE_TO_METAL_ION	GO_RESPONSE_TO_METAL_ION		322	0.324547	1.55186	0.00203252	0.127143	0.999	4808	tags=26%, list=15%, signal=30%
GO_DNA_TEMPLATED_TRANSCRIPTION_INITIATION	GO_DNA_TEMPLATED_TRANSCRIPTION_INITIATION		195	0.348122	1.55182	0.0230126	0.127072	0.999	4107	tags=28%, list=13%, signal=32%
GO_RESPONSE_TO_INTERLEUKIN_6	GO_RESPONSE_TO_INTERLEUKIN_6		26	0.488582	1.55174	0.038	0.127028	0.999	4829	tags=38%, list=15%, signal=45%
GO_NEGATIVE_REGULATION_OF_NEURON_DEATH	GO_NEGATIVE_REGULATION_OF_NEURON_DEATH		164	0.365925	1.55171	0.0263158	0.126966	0.999	5420	tags=32%, list=17%, signal=39%
GO_PROTEIN_IMPORT	GO_PROTEIN_IMPORT		150	0.376897	1.55114	0.0364807	0.127323	0.999	4457	tags=29%, list=14%, signal=33%
GO_HINDBRAIN_DEVELOPMENT	GO_HINDBRAIN_DEVELOPMENT		136	0.396247	1.55108	0.0316456	0.127273	0.999	5031	tags=31%, list=16%, signal=37%
GO_POST_EMBRYONIC_DEVELOPMENT	GO_POST_EMBRYONIC_DEVELOPMENT		85	0.397524	1.55097	0.022869	0.127263	0.999	2920	tags=24%, list=9%, signal=26%
GO_REGULATION_OF_TRANSCRIPTION_INVOLVED_IN_G1_S_TRANSITION_OF_MITOTIC_CELL_CYCLE	GO_REGULATION_OF_TRANSCRIPTION_INVOLVED_IN_G1_S_TRANSITION_OF_MITOTIC_CELL_CYCLE		26	0.569971	1.55097	0.108871	0.127163	0.999	5894	tags=54%, list=19%, signal=66%
GO_SIALYLTRANSFERASE_ACTIVITY	GO_SIALYLTRANSFERASE_ACTIVITY		20	0.523446	1.55084	0.0453649	0.127161	0.999	7206	tags=50%, list=23%, signal=65%
GO_SIALYLATION	GO_SIALYLATION		20	0.523446	1.55084	0.0453649	0.127061	0.999	7206	tags=50%, list=23%, signal=65%
GO_REGULATION_OF_DNA_REPLICATION	GO_REGULATION_OF_DNA_REPLICATION		153	0.393926	1.5504	0.0658174	0.127315	0.999	6528	tags=41%, list=21%, signal=52%
GO_ACTIN_FILAMENT_ORGANIZATION	GO_ACTIN_FILAMENT_ORGANIZATION		162	0.351758	1.54998	0.0271967	0.127528	0.999	4735	tags=28%, list=15%, signal=33%
GO_SPHINGOLIPID_BIOSYNTHETIC_PROCESS	GO_SPHINGOLIPID_BIOSYNTHETIC_PROCESS		70	0.38467	1.54971	0.0247934	0.12763	0.999	7607	tags=47%, list=24%, signal=62%
GO_NEGATIVE_REGULATION_OF_NEURON_APOPTOTIC_PROCESS	GO_NEGATIVE_REGULATION_OF_NEURON_APOPTOTIC_PROCESS		131	0.380076	1.54953	0.0240964	0.127653	0.999	5420	tags=32%, list=17%, signal=38%
GO_COP9_SIGNALOSOME	GO_COP9_SIGNALOSOME		32	0.479757	1.5495	0.0475207	0.127578	0.999	3594	tags=31%, list=11%, signal=35%
GO_REGULATION_OF_AUTOPHAGOSOME_ASSEMBLY	GO_REGULATION_OF_AUTOPHAGOSOME_ASSEMBLY		34	0.460992	1.54934	0.055336	0.127621	0.999	2506	tags=32%, list=8%, signal=35%
GO_HISTONE_MRNA_METABOLIC_PROCESS	GO_HISTONE_MRNA_METABOLIC_PROCESS		28	0.51978	1.54907	0.0669371	0.127738	0.999	4275	tags=36%, list=13%, signal=41%
GO_AMIDE_BINDING	GO_AMIDE_BINDING		255	0.33865	1.54903	0.00607287	0.127671	0.999	6194	tags=33%, list=19%, signal=41%
GO_NEGATIVE_REGULATION_OF_REPRODUCTIVE_PROCESS	GO_NEGATIVE_REGULATION_OF_REPRODUCTIVE_PROCESS		49	0.411613	1.54903	0.0308285	0.127571	0.999	5187	tags=29%, list=16%, signal=34%
GO_SH2_DOMAIN_BINDING	GO_SH2_DOMAIN_BINDING		28	0.470553	1.549	0.0366089	0.127488	0.999	7046	tags=43%, list=22%, signal=55%
GO_PHOSPHATIDYLCHOLINE_BINDING	GO_PHOSPHATIDYLCHOLINE_BINDING		20	0.526656	1.54843	0.0328542	0.127823	0.999	6524	tags=55%, list=21%, signal=69%
GO_POSITIVE_REGULATION_OF_REPRODUCTIVE_PROCESS	GO_POSITIVE_REGULATION_OF_REPRODUCTIVE_PROCESS		48	0.404837	1.54771	0.0286299	0.128319	0.999	4762	tags=27%, list=15%, signal=32%
GO_GLUTAMATE_RECEPTOR_BINDING	GO_GLUTAMATE_RECEPTOR_BINDING		37	0.454736	1.54727	0.0487805	0.128553	0.999	2633	tags=24%, list=8%, signal=26%
GO_INSULIN_RECEPTOR_SIGNALING_PATHWAY	GO_INSULIN_RECEPTOR_SIGNALING_PATHWAY		77	0.395191	1.54688	0.0224033	0.128756	0.999	6642	tags=39%, list=21%, signal=49%
GO_POLYUBIQUITIN_BINDING	GO_POLYUBIQUITIN_BINDING		40	0.468655	1.54675	0.0575693	0.128746	0.999	3672	tags=33%, list=12%, signal=37%
GO_INTRA_GOLGI_VESICLE_MEDIATED_TRANSPORT	GO_INTRA_GOLGI_VESICLE_MEDIATED_TRANSPORT		45	0.493724	1.54662	0.0665281	0.128737	0.999	4769	tags=38%, list=15%, signal=44%
GO_NEGATIVE_REGULATION_OF_OSTEOCLAST_DIFFERENTIATION	GO_NEGATIVE_REGULATION_OF_OSTEOCLAST_DIFFERENTIATION		24	0.508845	1.54544	0.0428571	0.129554	0.999	3358	tags=33%, list=11%, signal=37%
GO_VENTRICULAR_SYSTEM_DEVELOPMENT	GO_VENTRICULAR_SYSTEM_DEVELOPMENT		26	0.47831	1.54542	0.0720339	0.129464	0.999	8162	tags=54%, list=26%, signal=72%
GO_NEGATIVE_REGULATION_OF_PROTEIN_CATABOLIC_PROCESS	GO_NEGATIVE_REGULATION_OF_PROTEIN_CATABOLIC_PROCESS		103	0.388154	1.54491	0.0348361	0.129789	0.999	4829	tags=32%, list=15%, signal=38%
GO_PHOSPHATASE_REGULATOR_ACTIVITY	GO_PHOSPHATASE_REGULATOR_ACTIVITY		83	0.394426	1.54482	0.0248963	0.129759	0.999	3473	tags=28%, list=11%, signal=31%
GO_SINGLE_ORGANISM_CELL_ADHESION	GO_SINGLE_ORGANISM_CELL_ADHESION		431	0.390062	1.54476	0.0566038	0.129699	0.999	5244	tags=29%, list=17%, signal=34%
GO_NEGATIVE_REGULATION_OF_TRANSPORT	GO_NEGATIVE_REGULATION_OF_TRANSPORT		431	0.328178	1.54475	0.0121457	0.129609	0.999	4882	tags=25%, list=15%, signal=29%
GO_LYTIC_VACUOLE_MEMBRANE	GO_LYTIC_VACUOLE_MEMBRANE		255	0.362695	1.54443	0.0413223	0.129741	0.999	5555	tags=33%, list=17%, signal=40%
GO_NUCLEUS_ORGANIZATION	GO_NUCLEUS_ORGANIZATION		122	0.418157	1.54435	0.0829787	0.129701	0.999	4304	tags=34%, list=14%, signal=39%
GO_NEGATIVE_REGULATION_OF_LIPID_STORAGE	GO_NEGATIVE_REGULATION_OF_LIPID_STORAGE		17	0.554294	1.54397	0.0627615	0.12989	1	3302	tags=41%, list=10%, signal=46%
GO_CYTOPLASMIC_SEQUESTERING_OF_PROTEIN	GO_CYTOPLASMIC_SEQUESTERING_OF_PROTEIN		40	0.453427	1.54392	0.062753	0.129826	1	4008	tags=38%, list=13%, signal=43%
GO_CELLULAR_RESPONSE_TO_PEPTIDE	GO_CELLULAR_RESPONSE_TO_PEPTIDE		263	0.339871	1.54362	0.0101833	0.129946	1	6394	tags=31%, list=20%, signal=38%
GO_ANTIGEN_PROCESSING_AND_PRESENTATION_OF_PEPTIDE_ANTIGEN_VIA_MHC_CLASS_I	GO_ANTIGEN_PROCESSING_AND_PRESENTATION_OF_PEPTIDE_ANTIGEN_VIA_MHC_CLASS_I		90	0.494136	1.54353	0.0955285	0.129919	1	5478	tags=40%, list=17%, signal=48%
GO_PROTEIN_N_TERMINUS_BINDING	GO_PROTEIN_N_TERMINUS_BINDING		101	0.390765	1.54345	0.027833	0.129892	1	5286	tags=35%, list=17%, signal=41%
GO_LIPOSACCHARIDE_METABOLIC_PROCESS	GO_LIPOSACCHARIDE_METABOLIC_PROCESS		109	0.392346	1.54241	0.0313725	0.130691	1	7206	tags=42%, list=23%, signal=54%
GO_INTRACELLULAR_RECEPTOR_SIGNALING_PATHWAY	GO_INTRACELLULAR_RECEPTOR_SIGNALING_PATHWAY		160	0.371784	1.54202	0.0376569	0.130907	1	7878	tags=47%, list=25%, signal=62%
GO_BRUSH_BORDER	GO_BRUSH_BORDER		101	0.414377	1.54191	0.0640496	0.130878	1	4454	tags=30%, list=14%, signal=34%
GO_ANATOMICAL_STRUCTURE_MATURATION	GO_ANATOMICAL_STRUCTURE_MATURATION		39	0.438193	1.54152	0.0517928	0.131072	1	1728	tags=23%, list=5%, signal=24%
GO_NEGATIVE_REGULATION_OF_CELLULAR_AMIDE_METABOLIC_PROCESS	GO_NEGATIVE_REGULATION_OF_CELLULAR_AMIDE_METABOLIC_PROCESS		118	0.369045	1.54143	0.0366599	0.131048	1	5870	tags=36%, list=18%, signal=43%
GO_GLIAL_CELL_DEVELOPMENT	GO_GLIAL_CELL_DEVELOPMENT		73	0.390077	1.5411	0.025	0.131208	1	5866	tags=37%, list=18%, signal=45%
GO_POSITIVE_REGULATION_OF_NIK_NF_KAPPAB_SIGNALING	GO_POSITIVE_REGULATION_OF_NIK_NF_KAPPAB_SIGNALING		29	0.509232	1.54064	0.0577689	0.131471	1	5859	tags=52%, list=18%, signal=63%
GO_RESPONSE_TO_PEPTIDE	GO_RESPONSE_TO_PEPTIDE		388	0.32862	1.54039	0.00613497	0.131564	1	5454	tags=27%, list=17%, signal=32%
GO_REGULATION_OF_SPINDLE_ORGANIZATION	GO_REGULATION_OF_SPINDLE_ORGANIZATION		19	0.594973	1.54026	0.0645833	0.13157	1	6529	tags=58%, list=21%, signal=73%
GO_PROTEIN_KINASE_COMPLEX	GO_PROTEIN_KINASE_COMPLEX		88	0.390733	1.54008	0.0398323	0.131599	1	4360	tags=34%, list=14%, signal=39%
GO_CELLULAR_RESPONSE_TO_FLUID_SHEAR_STRESS	GO_CELLULAR_RESPONSE_TO_FLUID_SHEAR_STRESS		18	0.519889	1.54004	0.0612245	0.13153	1	5161	tags=39%, list=16%, signal=46%
GO_FEMALE_SEX_DIFFERENTIATION	GO_FEMALE_SEX_DIFFERENTIATION		110	0.37106	1.53984	0.0287474	0.131592	1	8211	tags=42%, list=26%, signal=56%
GO_SCAFFOLD_PROTEIN_BINDING	GO_SCAFFOLD_PROTEIN_BINDING		45	0.400289	1.53982	0.0284553	0.131506	1	4360	tags=27%, list=14%, signal=31%
GO_DNA_DOUBLE_STRAND_BREAK_PROCESSING	GO_DNA_DOUBLE_STRAND_BREAK_PROCESSING		19	0.53266	1.53978	0.0563674	0.131424	1	6877	tags=47%, list=22%, signal=60%
GO_REGULATION_OF_RYANODINE_SENSITIVE_CALCIUM_RELEASE_CHANNEL_ACTIVITY	GO_REGULATION_OF_RYANODINE_SENSITIVE_CALCIUM_RELEASE_CHANNEL_ACTIVITY		26	0.524091	1.53874	0.0856031	0.132191	1	6232	tags=50%, list=20%, signal=62%
GO_VISUAL_BEHAVIOR	GO_VISUAL_BEHAVIOR		47	0.432041	1.53868	0.0343434	0.132143	1	4328	tags=30%, list=14%, signal=34%
GO_GOLGI_STACK	GO_GOLGI_STACK		121	0.390246	1.53784	0.0483193	0.132735	1	4553	tags=31%, list=14%, signal=37%
GO_GALACTOSYLTRANSFERASE_ACTIVITY	GO_GALACTOSYLTRANSFERASE_ACTIVITY		29	0.503085	1.5378	0.0805085	0.13267	1	5460	tags=45%, list=17%, signal=54%
GO_EPHRIN_RECEPTOR_SIGNALING_PATHWAY	GO_EPHRIN_RECEPTOR_SIGNALING_PATHWAY		84	0.416201	1.53766	0.0594059	0.132646	1	4306	tags=27%, list=14%, signal=32%
GO_MICROVILLUS	GO_MICROVILLUS		71	0.396101	1.53735	0.0250522	0.13279	1	7580	tags=38%, list=24%, signal=50%
GO_CLATHRIN_MEDIATED_ENDOCYTOSIS	GO_CLATHRIN_MEDIATED_ENDOCYTOSIS		35	0.433433	1.53693	0.0412574	0.133003	1	4933	tags=34%, list=16%, signal=41%
GO_MICROTUBULE_POLYMERIZATION	GO_MICROTUBULE_POLYMERIZATION		26	0.486605	1.53645	0.045082	0.133288	1	7273	tags=54%, list=23%, signal=70%
GO_ANTERIOR_POSTERIOR_AXIS_SPECIFICATION	GO_ANTERIOR_POSTERIOR_AXIS_SPECIFICATION		45	0.424057	1.53604	0.0365112	0.133532	1	5849	tags=38%, list=18%, signal=46%
GO_NEGATIVE_REGULATION_OF_TRANSFERASE_ACTIVITY	GO_NEGATIVE_REGULATION_OF_TRANSFERASE_ACTIVITY		342	0.332976	1.53525	0.0247934	0.134067	1	5544	tags=31%, list=17%, signal=37%
GO_POSITIVE_REGULATION_OF_LIPID_METABOLIC_PROCESS	GO_POSITIVE_REGULATION_OF_LIPID_METABOLIC_PROCESS		121	0.35599	1.5349	0.010142	0.134261	1	6130	tags=36%, list=19%, signal=44%
GO_NEGATIVE_REGULATION_OF_MITOCHONDRION_ORGANIZATION	GO_NEGATIVE_REGULATION_OF_MITOCHONDRION_ORGANIZATION		35	0.443176	1.53478	0.046371	0.134253	1	5088	tags=31%, list=16%, signal=37%
GO_AGING	GO_AGING		253	0.338474	1.53394	0.0143149	0.13488	1	5625	tags=28%, list=18%, signal=34%
GO_EMBRYONIC_PLACENTA_MORPHOGENESIS	GO_EMBRYONIC_PLACENTA_MORPHOGENESIS		22	0.516937	1.53385	0.0442656	0.134848	1	8386	tags=55%, list=26%, signal=74%
GO_REGULATION_OF_LIPID_KINASE_ACTIVITY	GO_REGULATION_OF_LIPID_KINASE_ACTIVITY		47	0.449737	1.53382	0.0458167	0.134777	1	6130	tags=38%, list=19%, signal=47%
GO_MITOGEN_ACTIVATED_PROTEIN_KINASE_BINDING	GO_MITOGEN_ACTIVATED_PROTEIN_KINASE_BINDING		24	0.471825	1.5336	0.0374449	0.134853	1	3193	tags=33%, list=10%, signal=37%
GO_RECEPTOR_SIGNALING_PROTEIN_ACTIVITY	GO_RECEPTOR_SIGNALING_PROTEIN_ACTIVITY		165	0.3481	1.53349	0.0242915	0.134824	1	4829	tags=28%, list=15%, signal=33%
GO_HISTONE_H2A_UBIQUITINATION	GO_HISTONE_H2A_UBIQUITINATION		16	0.552431	1.53338	0.0693069	0.134803	1	3590	tags=50%, list=11%, signal=56%
GO_NEGATIVE_REGULATION_OF_PROTEIN_PROCESSING	GO_NEGATIVE_REGULATION_OF_PROTEIN_PROCESSING		33	0.446662	1.53333	0.0325671	0.134754	1	7647	tags=45%, list=24%, signal=60%
GO_NEGATIVE_REGULATION_OF_PROTEIN_MATURATION	GO_NEGATIVE_REGULATION_OF_PROTEIN_MATURATION		33	0.446662	1.53333	0.0325671	0.134652	1	7647	tags=45%, list=24%, signal=60%
GO_CARBOHYDRATE_DERIVATIVE_CATABOLIC_PROCESS	GO_CARBOHYDRATE_DERIVATIVE_CATABOLIC_PROCESS		170	0.351962	1.53307	0.0288066	0.134776	1	4945	tags=28%, list=16%, signal=33%
GO_NEGATIVE_REGULATION_OF_CATABOLIC_PROCESS	GO_NEGATIVE_REGULATION_OF_CATABOLIC_PROCESS		193	0.345603	1.53305	0.0107759	0.134684	1	4658	tags=29%, list=15%, signal=34%
GO_STRUCTURE_SPECIFIC_DNA_BINDING	GO_STRUCTURE_SPECIFIC_DNA_BINDING		111	0.401254	1.53273	0.0843621	0.134845	1	5710	tags=35%, list=18%, signal=43%
GO_POSITIVE_REGULATION_OF_SYNAPSE_ASSEMBLY	GO_POSITIVE_REGULATION_OF_SYNAPSE_ASSEMBLY		55	0.466548	1.53266	0.0416667	0.134787	1	3899	tags=29%, list=12%, signal=33%
GO_NEUROTROPHIN_SIGNALING_PATHWAY	GO_NEUROTROPHIN_SIGNALING_PATHWAY		23	0.483506	1.53246	0.0425101	0.134828	1	1768	tags=26%, list=6%, signal=28%
GO_DAMAGED_DNA_BINDING	GO_DAMAGED_DNA_BINDING		62	0.443688	1.53238	0.0878243	0.134786	1	5187	tags=45%, list=16%, signal=54%
GO_OVULATION	GO_OVULATION		17	0.572857	1.53112	0.0839844	0.135711	1	7097	tags=47%, list=22%, signal=61%
GO_POSITIVE_REGULATION_OF_CYTOKINE_PRODUCTION_INVOLVED_IN_IMMUNE_RESPONSE	GO_POSITIVE_REGULATION_OF_CYTOKINE_PRODUCTION_INVOLVED_IN_IMMUNE_RESPONSE		30	0.488054	1.53101	0.0695296	0.135694	1	6085	tags=40%, list=19%, signal=49%
GO_MEMBRANE_PROTEIN_ECTODOMAIN_PROTEOLYSIS	GO_MEMBRANE_PROTEIN_ECTODOMAIN_PROTEOLYSIS		21	0.512889	1.53075	0.0605428	0.135811	1	3237	tags=38%, list=10%, signal=42%
GO_ER_NUCLEUS_SIGNALING_PATHWAY	GO_ER_NUCLEUS_SIGNALING_PATHWAY		31	0.534053	1.53059	0.0805085	0.135849	1	5579	tags=48%, list=18%, signal=59%
GO_POSITIVE_REGULATION_OF_PROTEIN_LOCALIZATION_TO_CELL_PERIPHERY	GO_POSITIVE_REGULATION_OF_PROTEIN_LOCALIZATION_TO_CELL_PERIPHERY		35	0.448775	1.53045	0.0534979	0.135855	1	6957	tags=40%, list=22%, signal=51%
GO_POSITIVE_REGULATION_OF_PROTEIN_LOCALIZATION_TO_PLASMA_MEMBRANE	GO_POSITIVE_REGULATION_OF_PROTEIN_LOCALIZATION_TO_PLASMA_MEMBRANE		35	0.448775	1.53045	0.0534979	0.135754	1	6957	tags=40%, list=22%, signal=51%
GO_RECEPTOR_REGULATOR_ACTIVITY	GO_RECEPTOR_REGULATOR_ACTIVITY		44	0.403	1.53015	0.0184049	0.135889	1	2945	tags=23%, list=9%, signal=25%
GO_HISTONE_BINDING	GO_HISTONE_BINDING		160	0.392423	1.52956	0.0673684	0.136212	1	6919	tags=39%, list=22%, signal=50%
GO_CIRCADIAN_RHYTHM	GO_CIRCADIAN_RHYTHM		130	0.356188	1.52954	0.0222672	0.136129	1	6665	tags=38%, list=21%, signal=48%
GO_TOR_SIGNALING	GO_TOR_SIGNALING		16	0.522308	1.52933	0.0538302	0.136171	1	4818	tags=38%, list=15%, signal=44%
GO_ZINC_ION_TRANSMEMBRANE_TRANSPORTER_ACTIVITY	GO_ZINC_ION_TRANSMEMBRANE_TRANSPORTER_ACTIVITY		23	0.508403	1.5293	0.0506073	0.136091	1	5904	tags=43%, list=19%, signal=53%
GO_PROTEIN_FOLDING	GO_PROTEIN_FOLDING		203	0.433389	1.52882	0.0614407	0.136374	1	5381	tags=39%, list=17%, signal=47%
GO_PROTEIN_TYROSINE_PHOSPHATASE_ACTIVITY	GO_PROTEIN_TYROSINE_PHOSPHATASE_ACTIVITY		96	0.379809	1.52849	0.0407332	0.136553	1	6077	tags=34%, list=19%, signal=42%
GO_SITE_OF_POLARIZED_GROWTH	GO_SITE_OF_POLARIZED_GROWTH		140	0.372497	1.52817	0.041502	0.136719	1	4470	tags=27%, list=14%, signal=31%
GO_REGULATION_OF_PHOSPHATIDYLINOSITOL_3_KINASE_SIGNALING	GO_REGULATION_OF_PHOSPHATIDYLINOSITOL_3_KINASE_SIGNALING		133	0.386704	1.52816	0.043299	0.136624	1	4808	tags=30%, list=15%, signal=35%
GO_STRUCTURAL_CONSTITUENT_OF_CYTOSKELETON	GO_STRUCTURAL_CONSTITUENT_OF_CYTOSKELETON		94	0.376874	1.52812	0.0163934	0.136555	1	5719	tags=33%, list=18%, signal=40%
GO_REGULATION_OF_SMOOTH_MUSCLE_CONTRACTION	GO_REGULATION_OF_SMOOTH_MUSCLE_CONTRACTION		59	0.443945	1.52797	0.0382294	0.136564	1	5823	tags=39%, list=18%, signal=48%
GO_BRANCHING_INVOLVED_IN_SALIVARY_GLAND_MORPHOGENESIS	GO_BRANCHING_INVOLVED_IN_SALIVARY_GLAND_MORPHOGENESIS		16	0.54872	1.52744	0.0613861	0.13689	1	4100	tags=44%, list=13%, signal=50%
GO_DRUG_BINDING	GO_DRUG_BINDING		105	0.343284	1.52698	0.008	0.137164	1	5243	tags=31%, list=17%, signal=38%
GO_NEGATIVE_REGULATION_OF_CELL_CYCLE_G2_M_PHASE_TRANSITION	GO_NEGATIVE_REGULATION_OF_CELL_CYCLE_G2_M_PHASE_TRANSITION		23	0.499674	1.52679	0.101833	0.137232	1	6415	tags=65%, list=20%, signal=82%
GO_MICROTUBULE_ANCHORING	GO_MICROTUBULE_ANCHORING		17	0.557498	1.52673	0.0759754	0.137184	1	5994	tags=71%, list=19%, signal=87%
GO_RESPONSE_TO_IRON_ION	GO_RESPONSE_TO_IRON_ION		35	0.428955	1.52652	0.0352251	0.137244	1	7639	tags=43%, list=24%, signal=56%
GO_REGULATION_OF_HORMONE_BIOSYNTHETIC_PROCESS	GO_REGULATION_OF_HORMONE_BIOSYNTHETIC_PROCESS		18	0.500053	1.52609	0.0316832	0.13752	1	4774	tags=39%, list=15%, signal=46%
GO_NUCLEAR_ENVELOPE_ORGANIZATION	GO_NUCLEAR_ENVELOPE_ORGANIZATION		75	0.44682	1.52606	0.0989474	0.137442	1	4299	tags=35%, list=14%, signal=40%
GO_PARTURITION	GO_PARTURITION		20	0.523053	1.52589	0.0428571	0.13747	1	5940	tags=35%, list=19%, signal=43%
GO_PEPTIDYL_TYROSINE_DEPHOSPHORYLATION	GO_PEPTIDYL_TYROSINE_DEPHOSPHORYLATION		94	0.378137	1.52521	0.0349076	0.137964	1	8025	tags=44%, list=25%, signal=58%
GO_CHROMATIN_MODIFICATION	GO_CHROMATIN_MODIFICATION		489	0.34233	1.52455	0.0541667	0.138413	1	6092	tags=35%, list=19%, signal=42%
GO_HELICASE_ACTIVITY	GO_HELICASE_ACTIVITY		149	0.413713	1.52419	0.0883621	0.138611	1	5845	tags=41%, list=18%, signal=50%
GO_AUTOPHAGY	GO_AUTOPHAGY		366	0.340093	1.52384	0.0123203	0.138787	1	5778	tags=33%, list=18%, signal=40%
GO_HINDBRAIN_MORPHOGENESIS	GO_HINDBRAIN_MORPHOGENESIS		39	0.443329	1.52375	0.0465587	0.138757	1	4552	tags=38%, list=14%, signal=45%
GO_RECOMBINATIONAL_REPAIR	GO_RECOMBINATIONAL_REPAIR		71	0.448308	1.52374	0.105708	0.13867	1	7378	tags=49%, list=23%, signal=64%
GO_POSTTRANSCRIPTIONAL_REGULATION_OF_GENE_EXPRESSION	GO_POSTTRANSCRIPTIONAL_REGULATION_OF_GENE_EXPRESSION		414	0.368995	1.52357	0.0559006	0.138735	1	5314	tags=33%, list=17%, signal=39%
GO_REGULATION_OF_NEURON_DEATH	GO_REGULATION_OF_NEURON_DEATH		243	0.338937	1.52323	0.0209205	0.138913	1	5073	tags=29%, list=16%, signal=35%
GO_RESPONSE_TO_HYDROGEN_PEROXIDE	GO_RESPONSE_TO_HYDROGEN_PEROXIDE		107	0.382478	1.52289	0.0399202	0.139081	1	5720	tags=34%, list=18%, signal=41%
GO_RESPONSE_TO_OXIDATIVE_STRESS	GO_RESPONSE_TO_OXIDATIVE_STRESS		337	0.327183	1.52284	0.0206612	0.13902	1	5726	tags=29%, list=18%, signal=35%
GO_MEMBRANE_BIOGENESIS	GO_MEMBRANE_BIOGENESIS		30	0.464757	1.52282	0.0594262	0.138936	1	6947	tags=50%, list=22%, signal=64%
GO_CONDENSED_CHROMOSOME_CENTROMERIC_REGION	GO_CONDENSED_CHROMOSOME_CENTROMERIC_REGION		83	0.51069	1.52256	0.130977	0.139066	1	7413	tags=58%, list=23%, signal=75%
GO_RESPONSE_TO_STARVATION	GO_RESPONSE_TO_STARVATION		145	0.364069	1.52247	0.0125523	0.139057	1	5330	tags=32%, list=17%, signal=38%
GO_CELLULAR_RESPONSE_TO_OXIDATIVE_STRESS	GO_CELLULAR_RESPONSE_TO_OXIDATIVE_STRESS		177	0.348253	1.52247	0.0208768	0.138955	1	6464	tags=34%, list=20%, signal=42%
GO_EMBRYONIC_FORELIMB_MORPHOGENESIS	GO_EMBRYONIC_FORELIMB_MORPHOGENESIS		30	0.480058	1.52203	0.0677618	0.139182	1	3837	tags=30%, list=12%, signal=34%
GO_MICROTUBULE_POLYMERIZATION_OR_DEPOLYMERIZATION	GO_MICROTUBULE_POLYMERIZATION_OR_DEPOLYMERIZATION		38	0.470123	1.52164	0.0668016	0.139426	1	7273	tags=47%, list=23%, signal=61%
GO_REGULATION_OF_RECEPTOR_ACTIVITY	GO_REGULATION_OF_RECEPTOR_ACTIVITY		115	0.372264	1.52093	0.0206186	0.139883	1	5482	tags=31%, list=17%, signal=38%
GO_REGULATION_OF_ANDROGEN_RECEPTOR_SIGNALING_PATHWAY	GO_REGULATION_OF_ANDROGEN_RECEPTOR_SIGNALING_PATHWAY		22	0.446715	1.52067	0.0514403	0.140007	1	4111	tags=27%, list=13%, signal=31%
GO_REGULATION_OF_BLOOD_VESSEL_ENDOTHELIAL_CELL_MIGRATION	GO_REGULATION_OF_BLOOD_VESSEL_ENDOTHELIAL_CELL_MIGRATION		49	0.439398	1.52056	0.0565657	0.139957	1	3423	tags=27%, list=11%, signal=30%
GO_REGULATION_OF_CHROMOSOME_ORGANIZATION	GO_REGULATION_OF_CHROMOSOME_ORGANIZATION		261	0.364123	1.52053	0.0702479	0.139884	1	5094	tags=33%, list=16%, signal=39%
GO_POSITIVE_REGULATION_OF_PROTEIN_POLYMERIZATION	GO_POSITIVE_REGULATION_OF_PROTEIN_POLYMERIZATION		86	0.361933	1.5197	0.0212766	0.140474	1	4380	tags=26%, list=14%, signal=30%
GO_POSITIVE_REGULATION_OF_BMP_SIGNALING_PATHWAY	GO_POSITIVE_REGULATION_OF_BMP_SIGNALING_PATHWAY		31	0.454479	1.51955	0.0515464	0.14049	1	2637	tags=26%, list=8%, signal=28%
GO_MESENCHYMAL_TO_EPITHELIAL_TRANSITION	GO_MESENCHYMAL_TO_EPITHELIAL_TRANSITION		15	0.554544	1.51912	0.07393	0.140742	1	2745	tags=33%, list=9%, signal=36%
GO_POSITIVE_REGULATION_OF_RESPONSE_TO_EXTERNAL_STIMULUS	GO_POSITIVE_REGULATION_OF_RESPONSE_TO_EXTERNAL_STIMULUS		285	0.374903	1.51867	0.0715706	0.141029	1	8060	tags=43%, list=25%, signal=57%
GO_NEGATIVE_REGULATION_OF_STEROID_METABOLIC_PROCESS	GO_NEGATIVE_REGULATION_OF_STEROID_METABOLIC_PROCESS		23	0.485804	1.51846	0.0536779	0.1411	1	5894	tags=43%, list=19%, signal=53%
GO_PHOSPHOTRANSFERASE_ACTIVITY_FOR_OTHER_SUBSTITUTED_PHOSPHATE_GROUPS	GO_PHOSPHOTRANSFERASE_ACTIVITY_FOR_OTHER_SUBSTITUTED_PHOSPHATE_GROUPS		18	0.522138	1.51844	0.0616016	0.141012	1	5194	tags=50%, list=16%, signal=60%
GO_REGULATION_OF_UBIQUITIN_PROTEIN_LIGASE_ACTIVITY	GO_REGULATION_OF_UBIQUITIN_PROTEIN_LIGASE_ACTIVITY		17	0.513498	1.51828	0.0761523	0.141038	1	2475	tags=41%, list=8%, signal=45%
GO_REGULATION_OF_LIPID_STORAGE	GO_REGULATION_OF_LIPID_STORAGE		39	0.437963	1.51786	0.0530612	0.141304	1	3302	tags=31%, list=10%, signal=34%
GO_LIPID_LOCALIZATION	GO_LIPID_LOCALIZATION		252	0.337062	1.51702	0.0203252	0.141924	1	6917	tags=37%, list=22%, signal=46%
GO_POSITIVE_REGULATION_OF_CELLULAR_RESPONSE_TO_TRANSFORMING_GROWTH_FACTOR_BETA_STIMULUS	GO_POSITIVE_REGULATION_OF_CELLULAR_RESPONSE_TO_TRANSFORMING_GROWTH_FACTOR_BETA_STIMULUS		24	0.462212	1.51669	0.0580913	0.142107	1	4829	tags=42%, list=15%, signal=49%
GO_POSITIVE_REGULATION_OF_TRANSFORMING_GROWTH_FACTOR_BETA_RECEPTOR_SIGNALING_PATHWAY	GO_POSITIVE_REGULATION_OF_TRANSFORMING_GROWTH_FACTOR_BETA_RECEPTOR_SIGNALING_PATHWAY		24	0.462212	1.51669	0.0580913	0.142004	1	4829	tags=42%, list=15%, signal=49%
GO_INNER_EAR_MORPHOGENESIS	GO_INNER_EAR_MORPHOGENESIS		91	0.364136	1.51629	0.014	0.142225	1	4422	tags=27%, list=14%, signal=32%
GO_CARDIAC_ATRIUM_DEVELOPMENT	GO_CARDIAC_ATRIUM_DEVELOPMENT		29	0.454893	1.51577	0.0420842	0.142622	1	5244	tags=38%, list=17%, signal=45%
GO_CYTOPLASMIC_MICROTUBULE	GO_CYTOPLASMIC_MICROTUBULE		51	0.430354	1.51569	0.0649087	0.142586	1	7647	tags=43%, list=24%, signal=57%
GO_PLACENTA_BLOOD_VESSEL_DEVELOPMENT	GO_PLACENTA_BLOOD_VESSEL_DEVELOPMENT		28	0.467998	1.51521	0.035343	0.142879	1	6913	tags=46%, list=22%, signal=59%
GO_MUSCLE_SYSTEM_PROCESS	GO_MUSCLE_SYSTEM_PROCESS		273	0.361677	1.51505	0.0418327	0.142916	1	4851	tags=30%, list=15%, signal=35%
GO_NEGATIVE_REGULATION_OF_CARDIAC_MUSCLE_TISSUE_DEVELOPMENT	GO_NEGATIVE_REGULATION_OF_CARDIAC_MUSCLE_TISSUE_DEVELOPMENT		17	0.504305	1.51371	0.0573123	0.143952	1	5073	tags=41%, list=16%, signal=49%
GO_ZINC_II_ION_TRANSPORT	GO_ZINC_II_ION_TRANSPORT		26	0.499838	1.51334	0.0443038	0.144184	1	5904	tags=42%, list=19%, signal=52%
GO_ACETYLTRANSFERASE_COMPLEX	GO_ACETYLTRANSFERASE_COMPLEX		85	0.408384	1.51331	0.0828283	0.144107	1	6076	tags=39%, list=19%, signal=48%
GO_VENTRICULAR_CARDIAC_MUSCLE_TISSUE_DEVELOPMENT	GO_VENTRICULAR_CARDIAC_MUSCLE_TISSUE_DEVELOPMENT		43	0.419021	1.51317	0.0294737	0.144112	1	2738	tags=26%, list=9%, signal=28%
GO_NUCLEAR_TRANSPORT	GO_NUCLEAR_TRANSPORT		342	0.352499	1.5131	0.0527426	0.144054	1	5496	tags=33%, list=17%, signal=39%
GO_REGULATION_OF_OSTEOCLAST_DIFFERENTIATION	GO_REGULATION_OF_OSTEOCLAST_DIFFERENTIATION		57	0.436142	1.51262	0.057377	0.144359	1	4029	tags=30%, list=13%, signal=34%
GO_POSITIVE_REGULATION_OF_PROTEIN_COMPLEX_ASSEMBLY	GO_POSITIVE_REGULATION_OF_PROTEIN_COMPLEX_ASSEMBLY		184	0.346329	1.51223	0.0375	0.144583	1	4413	tags=26%, list=14%, signal=29%
GO_KINASE_REGULATOR_ACTIVITY	GO_KINASE_REGULATOR_ACTIVITY		179	0.322508	1.51188	0.0256917	0.144754	1	5642	tags=28%, list=18%, signal=34%
GO_POSITIVE_REGULATION_OF_CELL_JUNCTION_ASSEMBLY	GO_POSITIVE_REGULATION_OF_CELL_JUNCTION_ASSEMBLY		24	0.448539	1.51183	0.0425963	0.144695	1	2378	tags=25%, list=7%, signal=27%
GO_MRNA_CLEAVAGE_FACTOR_COMPLEX	GO_MRNA_CLEAVAGE_FACTOR_COMPLEX		17	0.550369	1.5117	0.0851927	0.144708	1	2384	tags=35%, list=8%, signal=38%
GO_POSITIVE_REGULATION_OF_STRIATED_MUSCLE_CELL_DIFFERENTIATION	GO_POSITIVE_REGULATION_OF_STRIATED_MUSCLE_CELL_DIFFERENTIATION		46	0.419184	1.51125	0.0273684	0.144964	1	1822	tags=22%, list=6%, signal=23%
GO_PROTEIN_HYDROXYLATION	GO_PROTEIN_HYDROXYLATION		15	0.567052	1.51109	0.0691824	0.144981	1	3560	tags=40%, list=11%, signal=45%
GO_TRANSFERASE_COMPLEX_TRANSFERRING_PHOSPHORUS_CONTAINING_GROUPS	GO_TRANSFERASE_COMPLEX_TRANSFERRING_PHOSPHORUS_CONTAINING_GROUPS		230	0.364243	1.51069	0.0565217	0.14521	1	4162	tags=29%, list=13%, signal=33%
GO_ACTIN_FILAMENT_BUNDLE	GO_ACTIN_FILAMENT_BUNDLE		50	0.474267	1.51064	0.0762887	0.14516	1	7341	tags=50%, list=23%, signal=65%
GO_TRABECULA_MORPHOGENESIS	GO_TRABECULA_MORPHOGENESIS		37	0.433442	1.5106	0.0516899	0.145091	1	2837	tags=24%, list=9%, signal=27%
GO_GABA_RECEPTOR_BINDING	GO_GABA_RECEPTOR_BINDING		15	0.568881	1.51056	0.0507812	0.145029	1	5423	tags=47%, list=17%, signal=56%
GO_SINGLE_STRANDED_DNA_BINDING	GO_SINGLE_STRANDED_DNA_BINDING		81	0.437489	1.51042	0.118	0.145037	1	5807	tags=44%, list=18%, signal=54%
GO_AUTOPHAGOSOME	GO_AUTOPHAGOSOME		78	0.386175	1.51027	0.055102	0.145036	1	5915	tags=41%, list=19%, signal=50%
GO_ACTIVATION_OF_INNATE_IMMUNE_RESPONSE	GO_ACTIVATION_OF_INNATE_IMMUNE_RESPONSE		200	0.416086	1.51021	0.0955285	0.144974	1	5859	tags=36%, list=18%, signal=44%
GO_POSITIVE_REGULATION_OF_RELEASE_OF_SEQUESTERED_CALCIUM_ION_INTO_CYTOSOL	GO_POSITIVE_REGULATION_OF_RELEASE_OF_SEQUESTERED_CALCIUM_ION_INTO_CYTOSOL		36	0.429412	1.51004	0.047817	0.145006	1	4008	tags=31%, list=13%, signal=35%
GO_ENZYME_INHIBITOR_ACTIVITY	GO_ENZYME_INHIBITOR_ACTIVITY		346	0.297339	1.51002	0.00207469	0.144915	1	3749	tags=20%, list=12%, signal=22%
GO_LIPID_TRANSPORTER_ACTIVITY	GO_LIPID_TRANSPORTER_ACTIVITY		100	0.380031	1.50997	0.0354331	0.14485	1	6720	tags=39%, list=21%, signal=49%
GO_DNA_CONFORMATION_CHANGE	GO_DNA_CONFORMATION_CHANGE		237	0.415663	1.50946	0.108787	0.145152	1	6173	tags=39%, list=19%, signal=48%
GO_ORGAN_FORMATION	GO_ORGAN_FORMATION		34	0.412905	1.50939	0.0357853	0.145108	1	4100	tags=29%, list=13%, signal=34%
GO_CELLULAR_PROCESS_INVOLVED_IN_REPRODUCTION_IN_MULTICELLULAR_ORGANISM	GO_CELLULAR_PROCESS_INVOLVED_IN_REPRODUCTION_IN_MULTICELLULAR_ORGANISM		210	0.326412	1.50832	0.0191489	0.14589	1	5669	tags=30%, list=18%, signal=37%
GO_REGULATION_OF_PROTEIN_MODIFICATION_BY_SMALL_PROTEIN_CONJUGATION_OR_REMOVAL	GO_REGULATION_OF_PROTEIN_MODIFICATION_BY_SMALL_PROTEIN_CONJUGATION_OR_REMOVAL		266	0.379506	1.50827	0.0756303	0.145833	1	6917	tags=41%, list=22%, signal=52%
GO_POSITIVE_REGULATION_OF_AXONOGENESIS	GO_POSITIVE_REGULATION_OF_AXONOGENESIS		68	0.411587	1.50817	0.0493827	0.145794	1	4363	tags=32%, list=14%, signal=37%
GO_NUCLEOBASE_BIOSYNTHETIC_PROCESS	GO_NUCLEOBASE_BIOSYNTHETIC_PROCESS		18	0.56909	1.5081	0.0873984	0.145756	1	7104	tags=56%, list=22%, signal=72%
GO_MUSCLE_CONTRACTION	GO_MUSCLE_CONTRACTION		226	0.367756	1.50794	0.0382294	0.145783	1	5282	tags=32%, list=17%, signal=38%
GO_RESPONSE_TO_NUTRIENT	GO_RESPONSE_TO_NUTRIENT		188	0.335441	1.50769	0.0122951	0.145894	1	5940	tags=30%, list=19%, signal=37%
GO_HEART_GROWTH	GO_HEART_GROWTH		23	0.495201	1.50722	0.0730223	0.146149	1	4575	tags=39%, list=14%, signal=46%
GO_NEURONAL_POSTSYNAPTIC_DENSITY	GO_NEURONAL_POSTSYNAPTIC_DENSITY		51	0.472271	1.50721	0.0673469	0.146051	1	5415	tags=33%, list=17%, signal=40%
GO_NUCLEAR_INNER_MEMBRANE	GO_NUCLEAR_INNER_MEMBRANE		46	0.395575	1.50672	0.0434783	0.146396	1	3419	tags=30%, list=11%, signal=34%
GO_NON_RECOMBINATIONAL_REPAIR	GO_NON_RECOMBINATIONAL_REPAIR		64	0.434987	1.50655	0.0721649	0.146444	1	7217	tags=48%, list=23%, signal=63%
GO_TBP_CLASS_PROTEIN_BINDING	GO_TBP_CLASS_PROTEIN_BINDING		19	0.53239	1.50644	0.072	0.146436	1	4622	tags=47%, list=15%, signal=55%
GO_APICAL_JUNCTION_COMPLEX	GO_APICAL_JUNCTION_COMPLEX		117	0.393417	1.50629	0.0515021	0.146441	1	3385	tags=26%, list=11%, signal=30%
GO_ESTABLISHMENT_OF_LOCALIZATION_BY_MOVEMENT_ALONG_MICROTUBULE	GO_ESTABLISHMENT_OF_LOCALIZATION_BY_MOVEMENT_ALONG_MICROTUBULE		90	0.434539	1.50531	0.0702811	0.147175	1	7002	tags=48%, list=22%, signal=61%
GO_AMINO_SUGAR_METABOLIC_PROCESS	GO_AMINO_SUGAR_METABOLIC_PROCESS		39	0.440403	1.50501	0.0542169	0.147331	1	4165	tags=36%, list=13%, signal=41%
GO_CEREBELLAR_CORTEX_DEVELOPMENT	GO_CEREBELLAR_CORTEX_DEVELOPMENT		46	0.435565	1.50499	0.0536779	0.147244	1	4552	tags=35%, list=14%, signal=41%
GO_METANEPHROS_MORPHOGENESIS	GO_METANEPHROS_MORPHOGENESIS		28	0.464038	1.50491	0.045738	0.147194	1	5353	tags=39%, list=17%, signal=47%
GO_REGULATION_OF_MULTI_ORGANISM_PROCESS	GO_REGULATION_OF_MULTI_ORGANISM_PROCESS		438	0.338429	1.50472	0.052	0.147259	1	7814	tags=38%, list=25%, signal=50%
GO_RESPONSE_TO_ESTROGEN	GO_RESPONSE_TO_ESTROGEN		213	0.326799	1.504	0.0104822	0.147749	1	4592	tags=25%, list=14%, signal=29%
GO_INOSITOL_PHOSPHATE_MEDIATED_SIGNALING	GO_INOSITOL_PHOSPHATE_MEDIATED_SIGNALING		17	0.53326	1.50389	0.0506073	0.147741	1	8853	tags=71%, list=28%, signal=98%
GO_POSITIVE_REGULATION_OF_ORGAN_GROWTH	GO_POSITIVE_REGULATION_OF_ORGAN_GROWTH		35	0.416311	1.50305	0.0304878	0.148317	1	3659	tags=31%, list=12%, signal=35%
GO_PEPTIDYL_LYSINE_MODIFICATION	GO_PEPTIDYL_LYSINE_MODIFICATION		278	0.363051	1.50292	0.0751073	0.148315	1	6092	tags=35%, list=19%, signal=43%
GO_POSITIVE_REGULATION_OF_CELLULAR_AMIDE_METABOLIC_PROCESS	GO_POSITIVE_REGULATION_OF_CELLULAR_AMIDE_METABOLIC_PROCESS		98	0.354377	1.5023	0.0447154	0.148755	1	5359	tags=35%, list=17%, signal=42%
GO_POSITIVE_REGULATION_OF_LIPID_KINASE_ACTIVITY	GO_POSITIVE_REGULATION_OF_LIPID_KINASE_ACTIVITY		32	0.470631	1.50204	0.060241	0.148871	1	6130	tags=41%, list=19%, signal=50%
GO_REGULATION_OF_HEART_MORPHOGENESIS	GO_REGULATION_OF_HEART_MORPHOGENESIS		28	0.454474	1.50202	0.0490798	0.148785	1	4829	tags=39%, list=15%, signal=46%
GO_ATRIOVENTRICULAR_VALVE_DEVELOPMENT	GO_ATRIOVENTRICULAR_VALVE_DEVELOPMENT		19	0.53556	1.50193	0.0517928	0.148754	1	6913	tags=53%, list=22%, signal=67%
GO_POSITIVE_REGULATION_OF_INNATE_IMMUNE_RESPONSE	GO_POSITIVE_REGULATION_OF_INNATE_IMMUNE_RESPONSE		238	0.403553	1.50086	0.0983936	0.149562	1	5859	tags=34%, list=18%, signal=41%
GO_CELLULAR_RESPONSE_TO_NUTRIENT	GO_CELLULAR_RESPONSE_TO_NUTRIENT		38	0.436627	1.50071	0.0371134	0.1496	1	5078	tags=37%, list=16%, signal=44%
GO_REGULATION_OF_MITOCHONDRIAL_MEMBRANE_POTENTIAL	GO_REGULATION_OF_MITOCHONDRIAL_MEMBRANE_POTENTIAL		53	0.401828	1.50031	0.0506823	0.149875	1	4154	tags=28%, list=13%, signal=33%
GO_TISSUE_HOMEOSTASIS	GO_TISSUE_HOMEOSTASIS		158	0.320441	1.50026	0.0102881	0.149795	1	8587	tags=41%, list=27%, signal=55%
GO_LIPASE_INHIBITOR_ACTIVITY	GO_LIPASE_INHIBITOR_ACTIVITY		17	0.521962	1.50003	0.0669291	0.149911	1	6406	tags=47%, list=20%, signal=59%
GO_DEVELOPMENT_OF_PRIMARY_SEXUAL_CHARACTERISTICS	GO_DEVELOPMENT_OF_PRIMARY_SEXUAL_CHARACTERISTICS		199	0.325733	1.49961	0.0223124	0.150189	1	4835	tags=25%, list=15%, signal=29%
GO_VIRUS_RECEPTOR_ACTIVITY	GO_VIRUS_RECEPTOR_ACTIVITY		64	0.424355	1.49938	0.0623701	0.150289	1	7889	tags=47%, list=25%, signal=62%
GO_CELL_FATE_COMMITMENT	GO_CELL_FATE_COMMITMENT		212	0.325001	1.49897	0.00404858	0.150548	1	4422	tags=22%, list=14%, signal=26%
GO_REGULATION_OF_ALCOHOL_BIOSYNTHETIC_PROCESS	GO_REGULATION_OF_ALCOHOL_BIOSYNTHETIC_PROCESS		44	0.394803	1.49891	0.0361446	0.150498	1	7639	tags=41%, list=24%, signal=54%
GO_POSITIVE_REGULATION_OF_PROTEIN_SERINE_THREONINE_KINASE_ACTIVITY	GO_POSITIVE_REGULATION_OF_PROTEIN_SERINE_THREONINE_KINASE_ACTIVITY		278	0.325805	1.49878	0.0224033	0.150517	1	6921	tags=36%, list=22%, signal=45%
GO_INTRINSIC_APOPTOTIC_SIGNALING_PATHWAY_IN_RESPONSE_TO_DNA_DAMAGE	GO_INTRINSIC_APOPTOTIC_SIGNALING_PATHWAY_IN_RESPONSE_TO_DNA_DAMAGE		70	0.395594	1.49839	0.0619835	0.150747	1	5906	tags=33%, list=19%, signal=40%
GO_DEPHOSPHORYLATION	GO_DEPHOSPHORYLATION		261	0.327487	1.49813	0.0341365	0.15088	1	5011	tags=29%, list=16%, signal=34%
GO_SKELETAL_MUSCLE_ORGAN_DEVELOPMENT	GO_SKELETAL_MUSCLE_ORGAN_DEVELOPMENT		123	0.370318	1.49808	0.020202	0.150815	1	4970	tags=32%, list=16%, signal=37%
GO_SYNCYTIUM_FORMATION	GO_SYNCYTIUM_FORMATION		25	0.445223	1.49806	0.0462777	0.150741	1	2154	tags=28%, list=7%, signal=30%
GO_POSITIVE_REGULATION_OF_CALCIUM_ION_IMPORT	GO_POSITIVE_REGULATION_OF_CALCIUM_ION_IMPORT		51	0.395065	1.49733	0.0541667	0.15126	1	4008	tags=27%, list=13%, signal=31%
GO_PEROXISOME_PROLIFERATOR_ACTIVATED_RECEPTOR_BINDING	GO_PEROXISOME_PROLIFERATOR_ACTIVATED_RECEPTOR_BINDING		15	0.530722	1.49668	0.0789474	0.151726	1	4010	tags=40%, list=13%, signal=46%
GO_LAMIN_BINDING	GO_LAMIN_BINDING		17	0.485875	1.49637	0.0503018	0.15191	1	3029	tags=35%, list=10%, signal=39%
GO_POSITIVE_REGULATION_OF_CALCIUM_ION_TRANSPORT_INTO_CYTOSOL	GO_POSITIVE_REGULATION_OF_CALCIUM_ION_TRANSPORT_INTO_CYTOSOL		49	0.399564	1.49628	0.0509165	0.15187	1	4008	tags=29%, list=13%, signal=33%
GO_PROSTAGLANDIN_METABOLIC_PROCESS	GO_PROSTAGLANDIN_METABOLIC_PROCESS		26	0.480644	1.49612	0.05074	0.151885	1	6186	tags=42%, list=19%, signal=52%
GO_PROSTANOID_METABOLIC_PROCESS	GO_PROSTANOID_METABOLIC_PROCESS		26	0.480644	1.49612	0.05074	0.151781	1	6186	tags=42%, list=19%, signal=52%
GO_REGULATION_OF_CYTOKINE_PRODUCTION_INVOLVED_IN_IMMUNE_RESPONSE	GO_REGULATION_OF_CYTOKINE_PRODUCTION_INVOLVED_IN_IMMUNE_RESPONSE		55	0.468778	1.49603	0.0791667	0.15177	1	4510	tags=35%, list=14%, signal=40%
GO_PROTEIN_POLYMERIZATION	GO_PROTEIN_POLYMERIZATION		64	0.367504	1.49583	0.0349794	0.15183	1	7348	tags=44%, list=23%, signal=57%
GO_CILIARY_BASE	GO_CILIARY_BASE		21	0.488692	1.49579	0.0580913	0.151753	1	6051	tags=48%, list=19%, signal=59%
GO_PHAGOCYTIC_VESICLE	GO_PHAGOCYTIC_VESICLE		85	0.432735	1.49566	0.0862423	0.151759	1	6640	tags=42%, list=21%, signal=53%
GO_REGULATION_OF_SYNAPSE_ASSEMBLY	GO_REGULATION_OF_SYNAPSE_ASSEMBLY		72	0.423982	1.49564	0.0569745	0.151682	1	4835	tags=31%, list=15%, signal=36%
GO_POSITIVE_REGULATION_OF_NEURON_DEATH	GO_POSITIVE_REGULATION_OF_NEURON_DEATH		67	0.358107	1.49524	0.0305677	0.151937	1	2408	tags=22%, list=8%, signal=24%
GO_CYTOPLASMIC_MICROTUBULE_ORGANIZATION	GO_CYTOPLASMIC_MICROTUBULE_ORGANIZATION		39	0.401656	1.49433	0.0492813	0.152585	1	5999	tags=41%, list=19%, signal=51%
GO_COVALENT_CHROMATIN_MODIFICATION	GO_COVALENT_CHROMATIN_MODIFICATION		309	0.338351	1.49411	0.0743802	0.152661	1	6919	tags=39%, list=22%, signal=49%
GO_CARDIAC_VENTRICLE_MORPHOGENESIS	GO_CARDIAC_VENTRICLE_MORPHOGENESIS		60	0.400497	1.49386	0.033195	0.152766	1	5319	tags=33%, list=17%, signal=40%
GO_VENTRICULAR_SEPTUM_MORPHOGENESIS	GO_VENTRICULAR_SEPTUM_MORPHOGENESIS		28	0.466392	1.49367	0.0718563	0.152814	1	4861	tags=29%, list=15%, signal=34%
GO_RNA_POLYMERASE_II_REPRESSING_TRANSCRIPTION_FACTOR_BINDING	GO_RNA_POLYMERASE_II_REPRESSING_TRANSCRIPTION_FACTOR_BINDING		27	0.441972	1.49323	0.0598802	0.153089	1	5341	tags=41%, list=17%, signal=49%
GO_NUCLEOTIDE_TRANSPORT	GO_NUCLEOTIDE_TRANSPORT		25	0.465085	1.49299	0.0681818	0.153174	1	5287	tags=40%, list=17%, signal=48%
GO_MOTOR_ACTIVITY	GO_MOTOR_ACTIVITY		129	0.355916	1.49284	0.039666	0.153211	1	4865	tags=33%, list=15%, signal=38%
GO_BASAL_TRANSCRIPTION_MACHINERY_BINDING	GO_BASAL_TRANSCRIPTION_MACHINERY_BINDING		23	0.479975	1.49226	0.0843373	0.15362	1	5108	tags=43%, list=16%, signal=52%
GO_SIGNAL_SEQUENCE_BINDING	GO_SIGNAL_SEQUENCE_BINDING		37	0.483155	1.49221	0.0625	0.153555	1	4073	tags=38%, list=13%, signal=43%
GO_ENDOLYSOSOME	GO_ENDOLYSOSOME		15	0.554854	1.49213	0.0636943	0.153513	1	5121	tags=47%, list=16%, signal=56%
GO_SOLUTE_PROTON_SYMPORTER_ACTIVITY	GO_SOLUTE_PROTON_SYMPORTER_ACTIVITY		25	0.462112	1.49162	0.0439122	0.153851	1	6005	tags=40%, list=19%, signal=49%
GO_DNA_REPLICATION_INDEPENDENT_NUCLEOSOME_ASSEMBLY	GO_DNA_REPLICATION_INDEPENDENT_NUCLEOSOME_ASSEMBLY		44	0.51858	1.49145	0.141975	0.153873	1	6513	tags=52%, list=20%, signal=66%
GO_DNA_REPLICATION_INDEPENDENT_NUCLEOSOME_ORGANIZATION	GO_DNA_REPLICATION_INDEPENDENT_NUCLEOSOME_ORGANIZATION		44	0.51858	1.49145	0.141975	0.153769	1	6513	tags=52%, list=20%, signal=66%
GO_RAB_GTPASE_BINDING	GO_RAB_GTPASE_BINDING		111	0.368456	1.49123	0.041841	0.153859	1	6647	tags=41%, list=21%, signal=52%
GO_AORTA_MORPHOGENESIS	GO_AORTA_MORPHOGENESIS		22	0.475242	1.49088	0.0486258	0.154059	1	1770	tags=27%, list=6%, signal=29%
GO_TRANSCRIPTION_COACTIVATOR_ACTIVITY	GO_TRANSCRIPTION_COACTIVATOR_ACTIVITY		289	0.326655	1.49083	0.0360934	0.154018	1	6844	tags=38%, list=22%, signal=48%
GO_NEURAL_TUBE_PATTERNING	GO_NEURAL_TUBE_PATTERNING		32	0.437006	1.49032	0.0486815	0.15438	1	7153	tags=47%, list=23%, signal=60%
GO_REGULATION_OF_EPITHELIAL_CELL_DIFFERENTIATION	GO_REGULATION_OF_EPITHELIAL_CELL_DIFFERENTIATION		118	0.343559	1.49013	0.0306748	0.154439	1	3912	tags=25%, list=12%, signal=28%
GO_REGULATION_OF_ODONTOGENESIS	GO_REGULATION_OF_ODONTOGENESIS		24	0.482401	1.48994	0.0749507	0.154476	1	5743	tags=29%, list=18%, signal=36%
GO_MYELOID_CELL_DIFFERENTIATION	GO_MYELOID_CELL_DIFFERENTIATION		183	0.365062	1.48983	0.0628803	0.154451	1	5894	tags=32%, list=19%, signal=39%
GO_REGULATION_OF_MAP_KINASE_ACTIVITY	GO_REGULATION_OF_MAP_KINASE_ACTIVITY		310	0.332465	1.4896	0.026971	0.154527	1	8006	tags=41%, list=25%, signal=55%
GO_REGULATION_OF_DNA_DEPENDENT_DNA_REPLICATION	GO_REGULATION_OF_DNA_DEPENDENT_DNA_REPLICATION		39	0.467629	1.48947	0.128	0.154509	1	9442	tags=64%, list=30%, signal=91%
GO_GASTRULATION_WITH_MOUTH_FORMING_SECOND	GO_GASTRULATION_WITH_MOUTH_FORMING_SECOND		25	0.452613	1.48907	0.0652174	0.154749	1	5323	tags=32%, list=17%, signal=38%
GO_REGULATION_OF_INTERFERON_BETA_PRODUCTION	GO_REGULATION_OF_INTERFERON_BETA_PRODUCTION		43	0.448593	1.48898	0.0829959	0.154738	1	6069	tags=44%, list=19%, signal=55%
GO_POSITIVE_REGULATION_OF_RECEPTOR_INTERNALIZATION	GO_POSITIVE_REGULATION_OF_RECEPTOR_INTERNALIZATION		24	0.455988	1.48885	0.0559006	0.154746	1	3423	tags=29%, list=11%, signal=33%
GO_POSITIVE_REGULATION_OF_TRANSCRIPTION_FROM_RNA_POLYMERASE_II_PROMOTER_INVOLVED_IN_CELLULAR_RESPONSE_TO_CHEMICAL_STIMULUS	GO_POSITIVE_REGULATION_OF_TRANSCRIPTION_FROM_RNA_POLYMERASE_II_PROMOTER_INVOLVED_IN_CELLULAR_RESPONSE_TO_CHEMICAL_STIMULUS		25	0.476459	1.48884	0.071291	0.154648	1	4829	tags=44%, list=15%, signal=52%
GO_PHOSPHATASE_ACTIVITY	GO_PHOSPHATASE_ACTIVITY		250	0.324841	1.48875	0.0341365	0.154635	1	5011	tags=29%, list=16%, signal=34%
GO_REGULATION_OF_GENE_SILENCING	GO_REGULATION_OF_GENE_SILENCING		48	0.444906	1.48863	0.0739958	0.15464	1	7197	tags=40%, list=23%, signal=51%
GO_TISSUE_REGENERATION	GO_TISSUE_REGENERATION		45	0.420029	1.48834	0.0690377	0.154787	1	5816	tags=40%, list=18%, signal=49%
GO_ACTOMYOSIN	GO_ACTOMYOSIN		57	0.456163	1.48811	0.0826446	0.154888	1	8323	tags=56%, list=26%, signal=76%
GO_OXIDOREDUCTASE_ACTIVITY_ACTING_ON_THE_CH_NH2_GROUP_OF_DONORS	GO_OXIDOREDUCTASE_ACTIVITY_ACTING_ON_THE_CH_NH2_GROUP_OF_DONORS		18	0.500399	1.48782	0.0595483	0.155066	1	2584	tags=28%, list=8%, signal=30%
GO_REGULATION_OF_NON_CANONICAL_WNT_SIGNALING_PATHWAY	GO_REGULATION_OF_NON_CANONICAL_WNT_SIGNALING_PATHWAY		19	0.518798	1.48743	0.0853175	0.155282	1	6765	tags=58%, list=21%, signal=74%
GO_CALMODULIN_BINDING	GO_CALMODULIN_BINDING		175	0.342818	1.48732	0.0224033	0.15528	1	5334	tags=30%, list=17%, signal=36%
GO_REGULATION_OF_TRANSLATION_IN_RESPONSE_TO_STRESS	GO_REGULATION_OF_TRANSLATION_IN_RESPONSE_TO_STRESS		19	0.543439	1.48722	0.0842105	0.155238	1	5705	tags=53%, list=18%, signal=64%
GO_RESPONSE_TO_STEROL	GO_RESPONSE_TO_STEROL		23	0.479043	1.48715	0.0571429	0.155185	1	3827	tags=35%, list=12%, signal=40%
GO_PHOSPHATIDYLINOSITOL_3_KINASE_ACTIVITY	GO_PHOSPHATIDYLINOSITOL_3_KINASE_ACTIVITY		68	0.410349	1.48667	0.0581162	0.155517	1	5289	tags=34%, list=17%, signal=40%
GO_CELLULAR_RESPONSE_TO_CORTICOSTEROID_STIMULUS	GO_CELLULAR_RESPONSE_TO_CORTICOSTEROID_STIMULUS		54	0.390522	1.48657	0.0363985	0.155494	1	5290	tags=30%, list=17%, signal=35%
GO_PLATELET_MORPHOGENESIS	GO_PLATELET_MORPHOGENESIS		19	0.46725	1.48617	0.0609756	0.15577	1	1768	tags=26%, list=6%, signal=28%
GO_PIGMENT_CELL_DIFFERENTIATION	GO_PIGMENT_CELL_DIFFERENTIATION		25	0.432834	1.48591	0.0578842	0.155881	1	2653	tags=28%, list=8%, signal=31%
GO_METANEPHRIC_NEPHRON_MORPHOGENESIS	GO_METANEPHRIC_NEPHRON_MORPHOGENESIS		21	0.489443	1.48556	0.0738397	0.156112	1	2745	tags=33%, list=9%, signal=36%
GO_REGULATION_OF_NEUROBLAST_PROLIFERATION	GO_REGULATION_OF_NEUROBLAST_PROLIFERATION		26	0.45239	1.48509	0.0407767	0.15647	1	2723	tags=27%, list=9%, signal=29%
GO_POSITIVE_REGULATION_OF_BLOOD_VESSEL_ENDOTHELIAL_CELL_MIGRATION	GO_POSITIVE_REGULATION_OF_BLOOD_VESSEL_ENDOTHELIAL_CELL_MIGRATION		25	0.499231	1.48498	0.0670732	0.156455	1	6485	tags=44%, list=20%, signal=55%
GO_AUTOPHAGOSOME_ORGANIZATION	GO_AUTOPHAGOSOME_ORGANIZATION		39	0.431219	1.48494	0.0928433	0.156385	1	4223	tags=38%, list=13%, signal=44%
GO_UBIQUITIN_LIKE_PROTEIN_CONJUGATING_ENZYME_ACTIVITY	GO_UBIQUITIN_LIKE_PROTEIN_CONJUGATING_ENZYME_ACTIVITY		29	0.5087	1.48415	0.0969072	0.156992	1	2693	tags=38%, list=8%, signal=41%
GO_TRANSCRIPTIONAL_REPRESSOR_ACTIVITY_RNA_POLYMERASE_II_ACTIVATING_TRANSCRIPTION_FACTOR_BINDING	GO_TRANSCRIPTIONAL_REPRESSOR_ACTIVITY_RNA_POLYMERASE_II_ACTIVATING_TRANSCRIPTION_FACTOR_BINDING		51	0.39431	1.48382	0.0365591	0.157156	1	5607	tags=37%, list=18%, signal=45%
GO_NEGATIVE_REGULATION_OF_NEURAL_PRECURSOR_CELL_PROLIFERATION	GO_NEGATIVE_REGULATION_OF_NEURAL_PRECURSOR_CELL_PROLIFERATION		20	0.46926	1.48368	0.0657084	0.157167	1	2133	tags=20%, list=7%, signal=21%
GO_MEIOTIC_CELL_CYCLE	GO_MEIOTIC_CELL_CYCLE		160	0.375305	1.48329	0.109533	0.157455	1	7297	tags=44%, list=23%, signal=57%
GO_RNA_STABILIZATION	GO_RNA_STABILIZATION		29	0.491988	1.48314	0.0808511	0.157462	1	6674	tags=45%, list=21%, signal=57%
GO_MAGNESIUM_ION_TRANSMEMBRANE_TRANSPORT	GO_MAGNESIUM_ION_TRANSMEMBRANE_TRANSPORT		16	0.563183	1.48312	0.109344	0.157381	1	8135	tags=56%, list=26%, signal=76%
GO_MAGNESIUM_ION_TRANSMEMBRANE_TRANSPORTER_ACTIVITY	GO_MAGNESIUM_ION_TRANSMEMBRANE_TRANSPORTER_ACTIVITY		16	0.563183	1.48312	0.109344	0.157277	1	8135	tags=56%, list=26%, signal=76%
GO_VACUOLE_ORGANIZATION	GO_VACUOLE_ORGANIZATION		158	0.349256	1.48301	0.0594262	0.157252	1	4493	tags=32%, list=14%, signal=37%
GO_NUCLEAR_CHROMOSOME	GO_NUCLEAR_CHROMOSOME		481	0.355667	1.48245	0.102669	0.157641	1	5906	tags=35%, list=19%, signal=42%
GO_REGULATION_OF_CARDIAC_MUSCLE_CONTRACTION	GO_REGULATION_OF_CARDIAC_MUSCLE_CONTRACTION		65	0.391325	1.48243	0.0477137	0.157549	1	6977	tags=45%, list=22%, signal=57%
GO_REGULATION_OF_NEURON_PROJECTION_REGENERATION	GO_REGULATION_OF_NEURON_PROJECTION_REGENERATION		20	0.473719	1.48241	0.0730223	0.157461	1	7561	tags=50%, list=24%, signal=66%
GO_CELLULAR_PIGMENTATION	GO_CELLULAR_PIGMENTATION		43	0.405894	1.48222	0.0649895	0.157525	1	5496	tags=40%, list=17%, signal=48%
GO_MAMMARY_GLAND_EPITHELIAL_CELL_DIFFERENTIATION	GO_MAMMARY_GLAND_EPITHELIAL_CELL_DIFFERENTIATION		16	0.512512	1.48216	0.0685484	0.157474	1	10058	tags=56%, list=32%, signal=82%
GO_PROTEIN_LOCALIZATION_TO_CHROMOSOME	GO_PROTEIN_LOCALIZATION_TO_CHROMOSOME		37	0.474241	1.48162	0.125	0.15784	1	7759	tags=57%, list=24%, signal=75%
GO_COLUMNAR_CUBOIDAL_EPITHELIAL_CELL_DEVELOPMENT	GO_COLUMNAR_CUBOIDAL_EPITHELIAL_CELL_DEVELOPMENT		46	0.37948	1.48157	0.0422265	0.157792	1	4271	tags=30%, list=13%, signal=35%
GO_ENDOPLASMIC_RETICULUM_GOLGI_INTERMEDIATE_COMPARTMENT	GO_ENDOPLASMIC_RETICULUM_GOLGI_INTERMEDIATE_COMPARTMENT		98	0.415611	1.4814	0.0850622	0.157851	1	8187	tags=48%, list=26%, signal=64%
GO_TRANSCRIPTION_FACTOR_ACTIVITY_RNA_POLYMERASE_II_CORE_PROMOTER_PROXIMAL_REGION_SEQUENCE_SPECIFIC_BINDING	GO_TRANSCRIPTION_FACTOR_ACTIVITY_RNA_POLYMERASE_II_CORE_PROMOTER_PROXIMAL_REGION_SEQUENCE_SPECIFIC_BINDING		312	0.319671	1.48126	0.0167364	0.157887	1	5894	tags=30%, list=19%, signal=37%
GO_ECTODERMAL_PLACODE_DEVELOPMENT	GO_ECTODERMAL_PLACODE_DEVELOPMENT		15	0.508019	1.48116	0.0461216	0.15787	1	5289	tags=33%, list=17%, signal=40%
GO_ECTODERMAL_PLACODE_MORPHOGENESIS	GO_ECTODERMAL_PLACODE_MORPHOGENESIS		15	0.508019	1.48116	0.0461216	0.157766	1	5289	tags=33%, list=17%, signal=40%
GO_ECTODERMAL_PLACODE_FORMATION	GO_ECTODERMAL_PLACODE_FORMATION		15	0.508019	1.48116	0.0461216	0.157663	1	5289	tags=33%, list=17%, signal=40%
GO_NEGATIVE_REGULATION_OF_APOPTOTIC_SIGNALING_PATHWAY	GO_NEGATIVE_REGULATION_OF_APOPTOTIC_SIGNALING_PATHWAY		189	0.351331	1.48111	0.0274841	0.157609	1	6021	tags=30%, list=19%, signal=36%
GO_REGULATION_OF_EXTENT_OF_CELL_GROWTH	GO_REGULATION_OF_EXTENT_OF_CELL_GROWTH		98	0.393915	1.48086	0.057377	0.157706	1	4363	tags=27%, list=14%, signal=31%
GO_INTRAMOLECULAR_OXIDOREDUCTASE_ACTIVITY_TRANSPOSING_S_S_BONDS	GO_INTRAMOLECULAR_OXIDOREDUCTASE_ACTIVITY_TRANSPOSING_S_S_BONDS		19	0.590155	1.48062	0.0946502	0.157813	1	4505	tags=53%, list=14%, signal=61%
GO_VESICLE_LOCALIZATION	GO_VESICLE_LOCALIZATION		215	0.380885	1.48011	0.0600414	0.158156	1	5887	tags=35%, list=19%, signal=43%
GO_DENDRITIC_SHAFT	GO_DENDRITIC_SHAFT		36	0.460422	1.47979	0.0843373	0.15833	1	3422	tags=28%, list=11%, signal=31%
GO_NEGATIVE_REGULATION_OF_STRESS_FIBER_ASSEMBLY	GO_NEGATIVE_REGULATION_OF_STRESS_FIBER_ASSEMBLY		16	0.536205	1.47932	0.0781563	0.158631	1	6147	tags=56%, list=19%, signal=70%
GO_ANATOMICAL_STRUCTURE_ARRANGEMENT	GO_ANATOMICAL_STRUCTURE_ARRANGEMENT		17	0.500625	1.47828	0.0643154	0.159391	1	4552	tags=41%, list=14%, signal=48%
GO_NEUROMUSCULAR_JUNCTION	GO_NEUROMUSCULAR_JUNCTION		54	0.421521	1.47812	0.0449898	0.159409	1	5656	tags=37%, list=18%, signal=45%
GO_PEPTIDASE_REGULATOR_ACTIVITY	GO_PEPTIDASE_REGULATOR_ACTIVITY		193	0.32764	1.47753	0.0156556	0.159819	1	3394	tags=21%, list=11%, signal=23%
GO_HEPATICOBILIARY_SYSTEM_DEVELOPMENT	GO_HEPATICOBILIARY_SYSTEM_DEVELOPMENT		125	0.333578	1.4769	0.024	0.160323	1	7297	tags=36%, list=23%, signal=47%
GO_POSITIVE_REGULATION_OF_MONOCYTE_CHEMOTAXIS	GO_POSITIVE_REGULATION_OF_MONOCYTE_CHEMOTAXIS		15	0.596414	1.47654	0.0900383	0.160511	1	9282	tags=73%, list=29%, signal=104%
GO_ALPHA_ACTININ_BINDING	GO_ALPHA_ACTININ_BINDING		20	0.508276	1.47611	0.0817996	0.16078	1	433	tags=15%, list=1%, signal=15%
GO_REGULATION_OF_ESTABLISHMENT_OR_MAINTENANCE_OF_CELL_POLARITY	GO_REGULATION_OF_ESTABLISHMENT_OR_MAINTENANCE_OF_CELL_POLARITY		20	0.504704	1.47596	0.0783133	0.160818	1	6795	tags=55%, list=21%, signal=70%
GO_REGULATION_OF_PROTEIN_STABILITY	GO_REGULATION_OF_PROTEIN_STABILITY		211	0.346152	1.47549	0.0417537	0.161148	1	7267	tags=41%, list=23%, signal=52%
GO_NEGATIVE_REGULATION_OF_DNA_RECOMBINATION	GO_NEGATIVE_REGULATION_OF_DNA_RECOMBINATION		15	0.536332	1.47512	0.0872093	0.161365	1	5364	tags=40%, list=17%, signal=48%
GO_RESPONSE_TO_ESTRADIOL	GO_RESPONSE_TO_ESTRADIOL		143	0.331802	1.47472	0.0301205	0.161663	1	5997	tags=29%, list=19%, signal=35%
GO_MONOCARBOXYLIC_ACID_BINDING	GO_MONOCARBOXYLIC_ACID_BINDING		63	0.388048	1.47406	0.0441767	0.162154	1	4571	tags=29%, list=14%, signal=33%
GO_REGULATION_OF_PRI_MIRNA_TRANSCRIPTION_FROM_RNA_POLYMERASE_II_PROMOTER	GO_REGULATION_OF_PRI_MIRNA_TRANSCRIPTION_FROM_RNA_POLYMERASE_II_PROMOTER		17	0.544047	1.47378	0.0762712	0.162306	1	3302	tags=29%, list=10%, signal=33%
GO_REGULATION_OF_TRANSLATIONAL_INITIATION	GO_REGULATION_OF_TRANSLATIONAL_INITIATION		79	0.431438	1.47348	0.106472	0.162447	1	5314	tags=38%, list=17%, signal=45%
GO_NEGATIVE_REGULATION_OF_ERK1_AND_ERK2_CASCADE	GO_NEGATIVE_REGULATION_OF_ERK1_AND_ERK2_CASCADE		51	0.372167	1.47235	0.054878	0.163427	1	2676	tags=22%, list=8%, signal=24%
GO_HISTONE_EXCHANGE	GO_HISTONE_EXCHANGE		42	0.511895	1.47176	0.13278	0.163896	1	6513	tags=52%, list=20%, signal=66%
GO_REGULATION_OF_PROTEIN_KINASE_B_SIGNALING	GO_REGULATION_OF_PROTEIN_KINASE_B_SIGNALING		117	0.335089	1.47164	0.0311284	0.163905	1	4687	tags=24%, list=15%, signal=28%
GO_REGULATION_OF_PHOSPHATASE_ACTIVITY	GO_REGULATION_OF_PHOSPHATASE_ACTIVITY		118	0.343036	1.47131	0.0427699	0.164085	1	4647	tags=28%, list=15%, signal=33%
GO_NEGATIVE_REGULATION_OF_ANION_TRANSPORT	GO_NEGATIVE_REGULATION_OF_ANION_TRANSPORT		32	0.445938	1.47102	0.0579439	0.164236	1	1826	tags=22%, list=6%, signal=23%
GO_RNA_POLYMERASE_II_CORE_PROMOTER_SEQUENCE_SPECIFIC_DNA_BINDING	GO_RNA_POLYMERASE_II_CORE_PROMOTER_SEQUENCE_SPECIFIC_DNA_BINDING		52	0.369693	1.46988	0.0510204	0.165158	1	2379	tags=21%, list=7%, signal=23%
GO_CORE_PROMOTER_SEQUENCE_SPECIFIC_DNA_BINDING	GO_CORE_PROMOTER_SEQUENCE_SPECIFIC_DNA_BINDING		98	0.358863	1.46982	0.0521921	0.165102	1	3827	tags=27%, list=12%, signal=30%
GO_REGULATION_OF_REPRODUCTIVE_PROCESS	GO_REGULATION_OF_REPRODUCTIVE_PROCESS		119	0.337646	1.46981	0.0374016	0.165006	1	5187	tags=25%, list=16%, signal=30%
GO_MALE_SEX_DIFFERENTIATION	GO_MALE_SEX_DIFFERENTIATION		141	0.327692	1.4695	0.0179641	0.165205	1	4829	tags=27%, list=15%, signal=32%
GO_CELLULAR_RESPONSE_TO_INSULIN_STIMULUS	GO_CELLULAR_RESPONSE_TO_INSULIN_STIMULUS		141	0.339653	1.46931	0.0368852	0.165272	1	6642	tags=35%, list=21%, signal=45%
GO_ARF_GUANYL_NUCLEOTIDE_EXCHANGE_FACTOR_ACTIVITY	GO_ARF_GUANYL_NUCLEOTIDE_EXCHANGE_FACTOR_ACTIVITY		23	0.455831	1.46925	0.0715746	0.165214	1	4368	tags=39%, list=14%, signal=45%
GO_REGULATION_OF_SYNAPTIC_TRANSMISSION_GABAERGIC	GO_REGULATION_OF_SYNAPTIC_TRANSMISSION_GABAERGIC		28	0.495732	1.46923	0.0996016	0.165124	1	5761	tags=39%, list=18%, signal=48%
GO_PHOSPHATIDYLINOSITOL_3_4_BISPHOSPHATE_BINDING	GO_PHOSPHATIDYLINOSITOL_3_4_BISPHOSPHATE_BINDING		19	0.504112	1.46891	0.0801603	0.165319	1	4523	tags=37%, list=14%, signal=43%
GO_P53_BINDING	GO_P53_BINDING		66	0.388226	1.46886	0.0743802	0.165266	1	7861	tags=48%, list=25%, signal=64%
GO_NEGATIVE_REGULATION_OF_AUTOPHAGY	GO_NEGATIVE_REGULATION_OF_AUTOPHAGY		51	0.37445	1.46846	0.0368852	0.1655	1	4551	tags=31%, list=14%, signal=37%
GO_CHAPERONE_MEDIATED_PROTEIN_FOLDING	GO_CHAPERONE_MEDIATED_PROTEIN_FOLDING		44	0.463888	1.46766	0.0880503	0.16611	1	5381	tags=43%, list=17%, signal=52%
GO_CELLULAR_RESPONSE_TO_LEPTIN_STIMULUS	GO_CELLULAR_RESPONSE_TO_LEPTIN_STIMULUS		16	0.545414	1.46747	0.0826271	0.166146	1	6707	tags=63%, list=21%, signal=79%
GO_NUCLEOSOME_BINDING	GO_NUCLEOSOME_BINDING		44	0.453903	1.46738	0.104822	0.166116	1	4565	tags=39%, list=14%, signal=45%
GO_NEGATIVE_REGULATION_OF_CALCIUM_MEDIATED_SIGNALING	GO_NEGATIVE_REGULATION_OF_CALCIUM_MEDIATED_SIGNALING		18	0.538635	1.46715	0.0838446	0.166248	1	6232	tags=50%, list=20%, signal=62%
GO_ALDEHYDE_DEHYDROGENASE_NAD_ACTIVITY	GO_ALDEHYDE_DEHYDROGENASE_NAD_ACTIVITY		19	0.486155	1.46688	0.0593047	0.166376	1	3718	tags=26%, list=12%, signal=30%
GO_REGULATION_OF_DEFENSE_RESPONSE_TO_VIRUS_BY_HOST	GO_REGULATION_OF_DEFENSE_RESPONSE_TO_VIRUS_BY_HOST		128	0.341418	1.46591	0.033543	0.167172	1	7814	tags=40%, list=25%, signal=53%
GO_XENOPHAGY	GO_XENOPHAGY		100	0.358063	1.46585	0.034188	0.16712	1	5699	tags=33%, list=18%, signal=40%
GO_OXIDOREDUCTASE_ACTIVITY_ACTING_ON_THE_ALDEHYDE_OR_OXO_GROUP_OF_DONORS	GO_OXIDOREDUCTASE_ACTIVITY_ACTING_ON_THE_ALDEHYDE_OR_OXO_GROUP_OF_DONORS		43	0.444566	1.46583	0.0892495	0.167039	1	6179	tags=37%, list=19%, signal=46%
GO_PORE_COMPLEX_ASSEMBLY	GO_PORE_COMPLEX_ASSEMBLY		15	0.589244	1.46582	0.107759	0.166945	1	8107	tags=73%, list=26%, signal=98%
GO_REGULATION_OF_RELEASE_OF_SEQUESTERED_CALCIUM_ION_INTO_CYTOSOL	GO_REGULATION_OF_RELEASE_OF_SEQUESTERED_CALCIUM_ION_INTO_CYTOSOL		70	0.40286	1.46577	0.0769231	0.166877	1	7109	tags=41%, list=22%, signal=53%
GO_ENDOPEPTIDASE_ACTIVITY	GO_ENDOPEPTIDASE_ACTIVITY		408	0.311322	1.46569	0.0163934	0.166838	1	5582	tags=28%, list=18%, signal=34%
GO_PROTEIN_K63_LINKED_DEUBIQUITINATION	GO_PROTEIN_K63_LINKED_DEUBIQUITINATION		23	0.457726	1.4656	0.074	0.166824	1	4642	tags=39%, list=15%, signal=46%
GO_POSITIVE_REGULATION_OF_HISTONE_METHYLATION	GO_POSITIVE_REGULATION_OF_HISTONE_METHYLATION		28	0.438856	1.46547	0.0853175	0.166848	1	6467	tags=46%, list=20%, signal=58%
GO_PROTEIN_SERINE_THREONINE_KINASE_INHIBITOR_ACTIVITY	GO_PROTEIN_SERINE_THREONINE_KINASE_INHIBITOR_ACTIVITY		30	0.416918	1.46543	0.0645161	0.16677	1	4682	tags=30%, list=15%, signal=35%
GO_DORSAL_VENTRAL_PATTERN_FORMATION	GO_DORSAL_VENTRAL_PATTERN_FORMATION		86	0.369027	1.46537	0.063745	0.166733	1	5331	tags=31%, list=17%, signal=38%
GO_NEGATIVE_REGULATION_OF_BLOOD_VESSEL_ENDOTHELIAL_CELL_MIGRATION	GO_NEGATIVE_REGULATION_OF_BLOOD_VESSEL_ENDOTHELIAL_CELL_MIGRATION		22	0.485608	1.46499	0.0983607	0.16701	1	3400	tags=27%, list=11%, signal=31%
GO_REGULATION_OF_MONOOXYGENASE_ACTIVITY	GO_REGULATION_OF_MONOOXYGENASE_ACTIVITY		60	0.373849	1.46449	0.0446247	0.167326	1	3138	tags=25%, list=10%, signal=28%
GO_REGULATION_OF_DENDRITE_MORPHOGENESIS	GO_REGULATION_OF_DENDRITE_MORPHOGENESIS		72	0.398817	1.46396	0.0691057	0.167678	1	4148	tags=29%, list=13%, signal=33%
GO_DORSAL_VENTRAL_NEURAL_TUBE_PATTERNING	GO_DORSAL_VENTRAL_NEURAL_TUBE_PATTERNING		16	0.518025	1.46384	0.0802469	0.167694	1	3286	tags=31%, list=10%, signal=35%
GO_COLUMNAR_CUBOIDAL_EPITHELIAL_CELL_DIFFERENTIATION	GO_COLUMNAR_CUBOIDAL_EPITHELIAL_CELL_DIFFERENTIATION		106	0.331454	1.46373	0.027833	0.167681	1	4271	tags=25%, list=13%, signal=29%
GO_SUBSTANTIA_NIGRA_DEVELOPMENT	GO_SUBSTANTIA_NIGRA_DEVELOPMENT		44	0.443359	1.46366	0.0717213	0.167628	1	6232	tags=39%, list=20%, signal=48%
GO_NEGATIVE_REGULATION_OF_PROTEOLYSIS	GO_NEGATIVE_REGULATION_OF_PROTEOLYSIS		304	0.310564	1.46358	0.01417	0.167601	1	4133	tags=21%, list=13%, signal=24%
GO_DNA_REPAIR_COMPLEX	GO_DNA_REPAIR_COMPLEX		41	0.424668	1.46338	0.106557	0.16768	1	4774	tags=39%, list=15%, signal=46%
GO_POSITIVE_REGULATION_OF_PEPTIDASE_ACTIVITY	GO_POSITIVE_REGULATION_OF_PEPTIDASE_ACTIVITY		149	0.35747	1.4632	0.0571429	0.167729	1	5752	tags=30%, list=18%, signal=37%
GO_RECYCLING_ENDOSOME	GO_RECYCLING_ENDOSOME		119	0.341662	1.46268	0.0329218	0.168117	1	7273	tags=44%, list=23%, signal=56%
GO_MAGNESIUM_ION_BINDING	GO_MAGNESIUM_ION_BINDING		188	0.334229	1.46238	0.0355649	0.168293	1	4631	tags=30%, list=15%, signal=35%
GO_DSRNA_FRAGMENTATION	GO_DSRNA_FRAGMENTATION		17	0.485332	1.46195	0.0828157	0.168594	1	1073	tags=24%, list=3%, signal=24%
GO_PRODUCTION_OF_SMALL_RNA_INVOLVED_IN_GENE_SILENCING_BY_RNA	GO_PRODUCTION_OF_SMALL_RNA_INVOLVED_IN_GENE_SILENCING_BY_RNA		17	0.485332	1.46195	0.0828157	0.168488	1	1073	tags=24%, list=3%, signal=24%
GO_CIRCULATORY_SYSTEM_PROCESS	GO_CIRCULATORY_SYSTEM_PROCESS		353	0.32887	1.46156	0.0356436	0.168757	1	4701	tags=25%, list=15%, signal=29%
GO_APICAL_JUNCTION_ASSEMBLY	GO_APICAL_JUNCTION_ASSEMBLY		38	0.457913	1.46125	0.103004	0.168901	1	3607	tags=34%, list=11%, signal=39%
GO_REGULATION_OF_PROTEIN_MATURATION	GO_REGULATION_OF_PROTEIN_MATURATION		76	0.392667	1.46049	0.0545455	0.16945	1	5773	tags=32%, list=18%, signal=38%
GO_METHYLATED_HISTONE_BINDING	GO_METHYLATED_HISTONE_BINDING		46	0.425161	1.46043	0.0901804	0.169407	1	6076	tags=43%, list=19%, signal=54%
GO_DERMATAN_SULFATE_PROTEOGLYCAN_METABOLIC_PROCESS	GO_DERMATAN_SULFATE_PROTEOGLYCAN_METABOLIC_PROCESS		16	0.562144	1.4604	0.0975104	0.169329	1	4936	tags=56%, list=16%, signal=67%
GO_REGULATION_OF_SYSTEMIC_ARTERIAL_BLOOD_PRESSURE	GO_REGULATION_OF_SYSTEMIC_ARTERIAL_BLOOD_PRESSURE		80	0.381721	1.46034	0.0556622	0.169268	1	3133	tags=24%, list=10%, signal=26%
GO_RESPONSE_TO_RETINOIC_ACID	GO_RESPONSE_TO_RETINOIC_ACID		100	0.344117	1.46024	0.0275591	0.169254	1	6262	tags=32%, list=20%, signal=40%
GO_INNATE_IMMUNE_RESPONSE_ACTIVATING_CELL_SURFACE_RECEPTOR_SIGNALING_PATHWAY	GO_INNATE_IMMUNE_RESPONSE_ACTIVATING_CELL_SURFACE_RECEPTOR_SIGNALING_PATHWAY		104	0.417756	1.45963	0.115152	0.16972	1	5478	tags=34%, list=17%, signal=41%
GO_MYOBLAST_FUSION	GO_MYOBLAST_FUSION		18	0.460679	1.45939	0.0681363	0.169844	1	3802	tags=33%, list=12%, signal=38%
GO_TRANSPORT_VESICLE	GO_TRANSPORT_VESICLE		324	0.352889	1.45925	0.063745	0.169874	1	6185	tags=34%, list=19%, signal=41%
GO_REFLEX	GO_REFLEX		19	0.522027	1.45883	0.0807087	0.170121	1	5420	tags=32%, list=17%, signal=38%
GO_TRANSCRIPTIONAL_ACTIVATOR_ACTIVITY_RNA_POLYMERASE_II_CORE_PROMOTER_PROXIMAL_REGION_SEQUENCE_SPECIFIC_BINDING	GO_TRANSCRIPTIONAL_ACTIVATOR_ACTIVITY_RNA_POLYMERASE_II_CORE_PROMOTER_PROXIMAL_REGION_SEQUENCE_SPECIFIC_BINDING		213	0.32688	1.4581	0.0273684	0.170737	1	4861	tags=26%, list=15%, signal=30%
GO_CENTROMERE_COMPLEX_ASSEMBLY	GO_CENTROMERE_COMPLEX_ASSEMBLY		39	0.526871	1.45809	0.158996	0.170632	1	6513	tags=56%, list=20%, signal=71%
GO_REGULATION_OF_MULTICELLULAR_ORGANISMAL_METABOLIC_PROCESS	GO_REGULATION_OF_MULTICELLULAR_ORGANISMAL_METABOLIC_PROCESS		35	0.431227	1.45804	0.0707071	0.170578	1	3297	tags=26%, list=10%, signal=29%
GO_INORGANIC_CATION_IMPORT_INTO_CELL	GO_INORGANIC_CATION_IMPORT_INTO_CELL		15	0.513895	1.4579	0.0604167	0.170597	1	9901	tags=73%, list=31%, signal=106%
GO_INORGANIC_ION_IMPORT_INTO_CELL	GO_INORGANIC_ION_IMPORT_INTO_CELL		15	0.513895	1.4579	0.0604167	0.170491	1	9901	tags=73%, list=31%, signal=106%
GO_REGULATION_OF_SYNAPSE_ORGANIZATION	GO_REGULATION_OF_SYNAPSE_ORGANIZATION		105	0.391144	1.45774	0.0701754	0.17054	1	4835	tags=27%, list=15%, signal=31%
GO_CARBOHYDRATE_BIOSYNTHETIC_PROCESS	GO_CARBOHYDRATE_BIOSYNTHETIC_PROCESS		117	0.369736	1.45771	0.0793319	0.170461	1	6524	tags=35%, list=21%, signal=44%
GO_CLATHRIN_VESICLE_COAT	GO_CLATHRIN_VESICLE_COAT		23	0.436239	1.45753	0.0709939	0.170507	1	4655	tags=35%, list=15%, signal=41%
GO_RESPONSE_TO_REACTIVE_OXYGEN_SPECIES	GO_RESPONSE_TO_REACTIVE_OXYGEN_SPECIES		186	0.339477	1.45727	0.0364372	0.170643	1	6542	tags=32%, list=21%, signal=40%
GO_MEMBRANE_PROTEIN_INTRACELLULAR_DOMAIN_PROTEOLYSIS	GO_MEMBRANE_PROTEIN_INTRACELLULAR_DOMAIN_PROTEOLYSIS		16	0.514203	1.45725	0.0964912	0.170552	1	3861	tags=44%, list=12%, signal=50%
GO_POSITIVE_REGULATION_OF_FILOPODIUM_ASSEMBLY	GO_POSITIVE_REGULATION_OF_FILOPODIUM_ASSEMBLY		23	0.481643	1.45697	0.0968992	0.170672	1	5415	tags=35%, list=17%, signal=42%
GO_HEART_TRABECULA_MORPHOGENESIS	GO_HEART_TRABECULA_MORPHOGENESIS		24	0.466922	1.45592	0.0755467	0.17153	1	2227	tags=21%, list=7%, signal=22%
GO_EXTRACELLULAR_MATRIX_ASSEMBLY	GO_EXTRACELLULAR_MATRIX_ASSEMBLY		16	0.561066	1.45544	0.0961924	0.171865	1	6637	tags=50%, list=21%, signal=63%
GO_REGULATION_OF_KIDNEY_DEVELOPMENT	GO_REGULATION_OF_KIDNEY_DEVELOPMENT		54	0.404036	1.45527	0.0471092	0.171906	1	3344	tags=22%, list=11%, signal=25%
GO_APICAL_PLASMA_MEMBRANE	GO_APICAL_PLASMA_MEMBRANE		280	0.326134	1.45526	0.0350515	0.17182	1	6509	tags=32%, list=20%, signal=40%
GO_NEGATIVE_REGULATION_OF_RESPONSE_TO_EXTERNAL_STIMULUS	GO_NEGATIVE_REGULATION_OF_RESPONSE_TO_EXTERNAL_STIMULUS		258	0.326337	1.45516	0.0469667	0.171797	1	4514	tags=23%, list=14%, signal=27%
GO_POSITIVE_REGULATION_OF_RECEPTOR_ACTIVITY	GO_POSITIVE_REGULATION_OF_RECEPTOR_ACTIVITY		44	0.396805	1.45457	0.0512295	0.172226	1	2870	tags=25%, list=9%, signal=27%
GO_PEPTIDYL_ASPARAGINE_MODIFICATION	GO_PEPTIDYL_ASPARAGINE_MODIFICATION		38	0.465759	1.45431	0.11134	0.172361	1	4450	tags=39%, list=14%, signal=46%
GO_TOLL_LIKE_RECEPTOR_SIGNALING_PATHWAY	GO_TOLL_LIKE_RECEPTOR_SIGNALING_PATHWAY		84	0.434032	1.45374	0.110429	0.172822	1	5773	tags=42%, list=18%, signal=51%
GO_HORMONE_MEDIATED_SIGNALING_PATHWAY	GO_HORMONE_MEDIATED_SIGNALING_PATHWAY		151	0.335815	1.4535	0.05	0.172952	1	4316	tags=27%, list=14%, signal=31%
GO_REGULATION_OF_DEPHOSPHORYLATION	GO_REGULATION_OF_DEPHOSPHORYLATION		146	0.332243	1.45343	0.048583	0.172903	1	4647	tags=27%, list=15%, signal=32%
GO_SIGNAL_TRANSDUCTION_IN_RESPONSE_TO_DNA_DAMAGE	GO_SIGNAL_TRANSDUCTION_IN_RESPONSE_TO_DNA_DAMAGE		91	0.395741	1.45285	0.116803	0.173356	1	6717	tags=43%, list=21%, signal=54%
GO_ISOMERASE_ACTIVITY	GO_ISOMERASE_ACTIVITY		141	0.37018	1.4528	0.0753138	0.173303	1	4505	tags=30%, list=14%, signal=35%
GO_PROTEIN_PHOSPHATASE_1_BINDING	GO_PROTEIN_PHOSPHATASE_1_BINDING		19	0.465513	1.45276	0.0826772	0.173227	1	4705	tags=37%, list=15%, signal=43%
GO_MYOTUBE_DIFFERENTIATION	GO_MYOTUBE_DIFFERENTIATION		49	0.380303	1.4523	0.0475248	0.17356	1	4385	tags=27%, list=14%, signal=31%
GO_REGULATION_OF_RAS_PROTEIN_SIGNAL_TRANSDUCTION	GO_REGULATION_OF_RAS_PROTEIN_SIGNAL_TRANSDUCTION		180	0.340637	1.45206	0.0483193	0.173684	1	4759	tags=29%, list=15%, signal=34%
GO_RECEPTOR_ACTIVATOR_ACTIVITY	GO_RECEPTOR_ACTIVATOR_ACTIVITY		31	0.411396	1.45181	0.0473251	0.173823	1	2945	tags=26%, list=9%, signal=28%
GO_NEGATIVE_REGULATION_OF_WOUND_HEALING	GO_NEGATIVE_REGULATION_OF_WOUND_HEALING		58	0.399685	1.45115	0.0573123	0.174319	1	3488	tags=22%, list=11%, signal=25%
GO_REGULATION_OF_COAGULATION	GO_REGULATION_OF_COAGULATION		86	0.373149	1.44998	0.055666	0.175296	1	6433	tags=30%, list=20%, signal=38%
GO_PHOSPHATIDYLINOSITOL_3_PHOSPHATE_BIOSYNTHETIC_PROCESS	GO_PHOSPHATIDYLINOSITOL_3_PHOSPHATE_BIOSYNTHETIC_PROCESS		47	0.433589	1.44989	0.0858896	0.175267	1	5618	tags=43%, list=18%, signal=52%
GO_REGULATION_OF_VACUOLE_ORGANIZATION	GO_REGULATION_OF_VACUOLE_ORGANIZATION		40	0.416753	1.44967	0.0850202	0.175382	1	5659	tags=40%, list=18%, signal=49%
GO_POSITIVE_REGULATION_OF_DNA_METABOLIC_PROCESS	GO_POSITIVE_REGULATION_OF_DNA_METABOLIC_PROCESS		175	0.350698	1.44886	0.0860656	0.176069	1	6529	tags=37%, list=21%, signal=46%
GO_REGULATION_OF_APOPTOTIC_SIGNALING_PATHWAY	GO_REGULATION_OF_APOPTOTIC_SIGNALING_PATHWAY		347	0.322765	1.44837	0.047817	0.176409	1	6110	tags=30%, list=19%, signal=36%
GO_MOLTING_CYCLE	GO_MOLTING_CYCLE		75	0.366729	1.44809	0.0646465	0.176562	1	5743	tags=31%, list=18%, signal=37%
GO_HAIR_CYCLE	GO_HAIR_CYCLE		75	0.366729	1.44809	0.0646465	0.176454	1	5743	tags=31%, list=18%, signal=37%
GO_R_SMAD_BINDING	GO_R_SMAD_BINDING		21	0.429178	1.44796	0.0570866	0.176487	1	4829	tags=33%, list=15%, signal=39%
GO_CRANIAL_NERVE_DEVELOPMENT	GO_CRANIAL_NERVE_DEVELOPMENT		42	0.403489	1.4478	0.0497018	0.176532	1	4422	tags=29%, list=14%, signal=33%
GO_NEGATIVE_REGULATION_OF_ORGANIC_ACID_TRANSPORT	GO_NEGATIVE_REGULATION_OF_ORGANIC_ACID_TRANSPORT		18	0.493442	1.44772	0.0645161	0.176506	1	1826	tags=28%, list=6%, signal=29%
GO_POSITIVE_REGULATION_OF_MUSCLE_HYPERTROPHY	GO_POSITIVE_REGULATION_OF_MUSCLE_HYPERTROPHY		21	0.461625	1.44771	0.0682731	0.17641	1	6433	tags=52%, list=20%, signal=66%
GO_POSITIVE_REGULATION_OF_CARDIAC_MUSCLE_HYPERTROPHY	GO_POSITIVE_REGULATION_OF_CARDIAC_MUSCLE_HYPERTROPHY		21	0.461625	1.44771	0.0682731	0.176303	1	6433	tags=52%, list=20%, signal=66%
GO_NEURAL_CREST_CELL_MIGRATION	GO_NEURAL_CREST_CELL_MIGRATION		50	0.397496	1.44737	0.0429448	0.176504	1	3642	tags=28%, list=11%, signal=32%
GO_POSITIVE_REGULATION_OF_ACTIN_FILAMENT_BUNDLE_ASSEMBLY	GO_POSITIVE_REGULATION_OF_ACTIN_FILAMENT_BUNDLE_ASSEMBLY		45	0.398602	1.44672	0.0753564	0.177	1	4328	tags=27%, list=14%, signal=31%
GO_CELLULAR_COMPONENT_DISASSEMBLY	GO_CELLULAR_COMPONENT_DISASSEMBLY		491	0.335113	1.4467	0.0892495	0.176907	1	4598	tags=28%, list=14%, signal=32%
GO_REGULATION_OF_TOLERANCE_INDUCTION	GO_REGULATION_OF_TOLERANCE_INDUCTION		17	0.583233	1.44668	0.151093	0.176829	1	8066	tags=65%, list=25%, signal=87%
GO_DIVALENT_INORGANIC_CATION_TRANSPORT	GO_DIVALENT_INORGANIC_CATION_TRANSPORT		253	0.322196	1.44636	0.0358566	0.177004	1	5503	tags=27%, list=17%, signal=32%
GO_REGULATION_OF_NEURON_APOPTOTIC_PROCESS	GO_REGULATION_OF_NEURON_APOPTOTIC_PROCESS		187	0.328388	1.44588	0.0386965	0.177426	1	5073	tags=28%, list=16%, signal=33%
GO_NEGATIVE_REGULATION_OF_STEM_CELL_DIFFERENTIATION	GO_NEGATIVE_REGULATION_OF_STEM_CELL_DIFFERENTIATION		41	0.384205	1.44548	0.0466926	0.177703	1	2947	tags=27%, list=9%, signal=30%
GO_EXCITATORY_SYNAPSE	GO_EXCITATORY_SYNAPSE		191	0.371779	1.44421	0.0763052	0.178777	1	6481	tags=32%, list=20%, signal=40%
GO_CYTOSOLIC_TRANSPORT	GO_CYTOSOLIC_TRANSPORT		203	0.352032	1.44368	0.0740741	0.179201	1	4047	tags=29%, list=13%, signal=33%
GO_REGULATION_OF_PROTEIN_IMPORT_INTO_NUCLEUS_TRANSLOCATION	GO_REGULATION_OF_PROTEIN_IMPORT_INTO_NUCLEUS_TRANSLOCATION		21	0.461234	1.44357	0.088843	0.179204	1	8423	tags=52%, list=27%, signal=71%
GO_POSITIVE_REGULATION_OF_PHOSPHOPROTEIN_PHOSPHATASE_ACTIVITY	GO_POSITIVE_REGULATION_OF_PHOSPHOPROTEIN_PHOSPHATASE_ACTIVITY		15	0.538994	1.44311	0.10101	0.179511	1	6919	tags=53%, list=22%, signal=68%
GO_REGULATION_OF_ERYTHROCYTE_DIFFERENTIATION	GO_REGULATION_OF_ERYTHROCYTE_DIFFERENTIATION		36	0.425113	1.44307	0.0991903	0.179432	1	8763	tags=56%, list=28%, signal=77%
GO_PEPTIDYL_TYROSINE_MODIFICATION	GO_PEPTIDYL_TYROSINE_MODIFICATION		182	0.332207	1.44301	0.0375783	0.17938	1	7746	tags=41%, list=24%, signal=53%
GO_REGULATION_OF_NEURAL_PRECURSOR_CELL_PROLIFERATION	GO_REGULATION_OF_NEURAL_PRECURSOR_CELL_PROLIFERATION		69	0.375632	1.44289	0.0532544	0.179422	1	6957	tags=38%, list=22%, signal=48%
GO_RESPONSE_TO_GONADOTROPIN	GO_RESPONSE_TO_GONADOTROPIN		26	0.440697	1.44256	0.0402542	0.17962	1	2745	tags=23%, list=9%, signal=25%
GO_REGULATION_OF_GENERATION_OF_PRECURSOR_METABOLITES_AND_ENERGY	GO_REGULATION_OF_GENERATION_OF_PRECURSOR_METABOLITES_AND_ENERGY		81	0.347244	1.44235	0.0324544	0.179705	1	4658	tags=32%, list=15%, signal=38%
GO_GOLGI_CISTERNA_MEMBRANE	GO_GOLGI_CISTERNA_MEMBRANE		73	0.386015	1.44154	0.0960699	0.18038	1	5671	tags=37%, list=18%, signal=45%
GO_REGULATION_OF_PHOSPHATIDYLINOSITOL_3_KINASE_ACTIVITY	GO_REGULATION_OF_PHOSPHATIDYLINOSITOL_3_KINASE_ACTIVITY		39	0.443817	1.44128	0.10297	0.180537	1	6130	tags=36%, list=19%, signal=44%
GO_PEPTIDYL_PROLINE_MODIFICATION	GO_PEPTIDYL_PROLINE_MODIFICATION		46	0.4319	1.44064	0.0744681	0.181045	1	4471	tags=35%, list=14%, signal=40%
GO_REGULATION_OF_LIPID_METABOLIC_PROCESS	GO_REGULATION_OF_LIPID_METABOLIC_PROCESS		266	0.309746	1.44008	0.0375494	0.181449	1	6167	tags=32%, list=19%, signal=40%
GO_REGULATION_OF_EPITHELIAL_CELL_APOPTOTIC_PROCESS	GO_REGULATION_OF_EPITHELIAL_CELL_APOPTOTIC_PROCESS		55	0.385143	1.43993	0.0702811	0.181464	1	4464	tags=31%, list=14%, signal=36%
GO_RESPONSE_TO_GROWTH_HORMONE	GO_RESPONSE_TO_GROWTH_HORMONE		28	0.437789	1.43983	0.0780287	0.18148	1	7238	tags=39%, list=23%, signal=51%
GO_REGULATION_OF_OLIGODENDROCYTE_DIFFERENTIATION	GO_REGULATION_OF_OLIGODENDROCYTE_DIFFERENTIATION		27	0.462619	1.43923	0.0626305	0.18194	1	6228	tags=37%, list=20%, signal=46%
GO_REGULATION_OF_POLYSACCHARIDE_METABOLIC_PROCESS	GO_REGULATION_OF_POLYSACCHARIDE_METABOLIC_PROCESS		41	0.380063	1.43902	0.0444444	0.18202	1	5454	tags=39%, list=17%, signal=47%
GO_COGNITION	GO_COGNITION		239	0.366568	1.43889	0.0892857	0.18206	1	6660	tags=33%, list=21%, signal=42%
GO_TRANSCRIPTION_ELONGATION_FACTOR_COMPLEX	GO_TRANSCRIPTION_ELONGATION_FACTOR_COMPLEX		39	0.426091	1.4373	0.0948454	0.183473	1	6221	tags=41%, list=20%, signal=51%
GO_SCF_UBIQUITIN_LIGASE_COMPLEX	GO_SCF_UBIQUITIN_LIGASE_COMPLEX		34	0.426685	1.4372	0.0805501	0.183449	1	4648	tags=35%, list=15%, signal=41%
GO_PROTEIN_ACETYLATION	GO_PROTEIN_ACETYLATION		112	0.351154	1.43719	0.0780287	0.18335	1	5547	tags=35%, list=17%, signal=42%
GO_CHROMATIN_DNA_BINDING	GO_CHROMATIN_DNA_BINDING		73	0.394766	1.43711	0.103659	0.183309	1	5040	tags=29%, list=16%, signal=34%
GO_NEUTRAL_AMINO_ACID_TRANSMEMBRANE_TRANSPORTER_ACTIVITY	GO_NEUTRAL_AMINO_ACID_TRANSMEMBRANE_TRANSPORTER_ACTIVITY		29	0.458605	1.43697	0.0750507	0.183316	1	8877	tags=59%, list=28%, signal=81%
GO_NEGATIVE_REGULATION_OF_DENDRITE_MORPHOGENESIS	GO_NEGATIVE_REGULATION_OF_DENDRITE_MORPHOGENESIS		15	0.519981	1.43668	0.0874752	0.183507	1	3177	tags=33%, list=10%, signal=37%
GO_REGULATION_OF_CARDIAC_MUSCLE_CELL_DIFFERENTIATION	GO_REGULATION_OF_CARDIAC_MUSCLE_CELL_DIFFERENTIATION		19	0.469972	1.43651	0.0628803	0.183566	1	3739	tags=32%, list=12%, signal=36%
GO_REGULATION_OF_ERBB_SIGNALING_PATHWAY	GO_REGULATION_OF_ERBB_SIGNALING_PATHWAY		78	0.372367	1.43601	0.0796646	0.18392	1	2934	tags=23%, list=9%, signal=25%
GO_1_PHOSPHATIDYLINOSITOL_3_KINASE_ACTIVITY	GO_1_PHOSPHATIDYLINOSITOL_3_KINASE_ACTIVITY		41	0.426492	1.43598	0.0848861	0.183849	1	5289	tags=41%, list=17%, signal=50%
GO_B_CELL_ACTIVATION_INVOLVED_IN_IMMUNE_RESPONSE	GO_B_CELL_ACTIVATION_INVOLVED_IN_IMMUNE_RESPONSE		34	0.461753	1.43576	0.106996	0.183953	1	5423	tags=41%, list=17%, signal=50%
GO_NEGATIVE_REGULATION_OF_CELL_CELL_ADHESION	GO_NEGATIVE_REGULATION_OF_CELL_CELL_ADHESION		130	0.380352	1.4357	0.0951417	0.183909	1	7654	tags=38%, list=24%, signal=49%
GO_REGULATION_OF_CALCIUM_ION_IMPORT	GO_REGULATION_OF_CALCIUM_ION_IMPORT		96	0.360667	1.43454	0.0731183	0.184943	1	7109	tags=36%, list=22%, signal=47%
GO_FIBROBLAST_GROWTH_FACTOR_RECEPTOR_SIGNALING_PATHWAY	GO_FIBROBLAST_GROWTH_FACTOR_RECEPTOR_SIGNALING_PATHWAY		80	0.356416	1.43438	0.0748441	0.184986	1	5345	tags=40%, list=17%, signal=48%
GO_CARDIAC_MUSCLE_TISSUE_MORPHOGENESIS	GO_CARDIAC_MUSCLE_TISSUE_MORPHOGENESIS		52	0.375508	1.43425	0.0407725	0.185017	1	4407	tags=29%, list=14%, signal=33%
GO_REGULATION_OF_DNA_BINDING	GO_REGULATION_OF_DNA_BINDING		93	0.349943	1.43405	0.055102	0.185104	1	7993	tags=46%, list=25%, signal=62%
GO_POSITIVE_REGULATION_OF_MICROTUBULE_POLYMERIZATION	GO_POSITIVE_REGULATION_OF_MICROTUBULE_POLYMERIZATION		18	0.453528	1.4337	0.08	0.185324	1	2774	tags=28%, list=9%, signal=30%
GO_KERATINOCYTE_DIFFERENTIATION	GO_KERATINOCYTE_DIFFERENTIATION		78	0.422375	1.43359	0.0802469	0.185327	1	2439	tags=21%, list=8%, signal=22%
GO_REGULATION_OF_CYCLIN_DEPENDENT_PROTEIN_KINASE_ACTIVITY	GO_REGULATION_OF_CYCLIN_DEPENDENT_PROTEIN_KINASE_ACTIVITY		94	0.351434	1.43317	0.0886598	0.1856	1	6029	tags=39%, list=19%, signal=48%
GO_POSITIVE_REGULATION_OF_SECRETION	GO_POSITIVE_REGULATION_OF_SECRETION		353	0.300702	1.43304	0.0230608	0.185605	1	5859	tags=29%, list=18%, signal=35%
GO_CELLULAR_RESPONSE_TO_REACTIVE_OXYGEN_SPECIES	GO_CELLULAR_RESPONSE_TO_REACTIVE_OXYGEN_SPECIES		102	0.344903	1.43304	0.0646465	0.1855	1	6149	tags=34%, list=19%, signal=42%
GO_REGULATION_OF_CARBOHYDRATE_METABOLIC_PROCESS	GO_REGULATION_OF_CARBOHYDRATE_METABOLIC_PROCESS		157	0.318103	1.43286	0.0383795	0.185562	1	4551	tags=28%, list=14%, signal=33%
GO_NEGATIVE_REGULATION_OF_OSTEOBLAST_DIFFERENTIATION	GO_NEGATIVE_REGULATION_OF_OSTEOBLAST_DIFFERENTIATION		38	0.405456	1.43266	0.0704225	0.185656	1	6652	tags=42%, list=21%, signal=53%
GO_NUCLEAR_TRANSCRIPTIONAL_REPRESSOR_COMPLEX	GO_NUCLEAR_TRANSCRIPTIONAL_REPRESSOR_COMPLEX		21	0.451852	1.43198	0.0829959	0.186162	1	5558	tags=33%, list=17%, signal=40%
GO_RESPONSE_TO_VITAMIN	GO_RESPONSE_TO_VITAMIN		97	0.337311	1.43191	0.0309278	0.186116	1	5161	tags=27%, list=16%, signal=32%
GO_K63_LINKED_POLYUBIQUITIN_BINDING	GO_K63_LINKED_POLYUBIQUITIN_BINDING		17	0.51388	1.43182	0.112527	0.186099	1	1513	tags=24%, list=5%, signal=25%
GO_NOTCH_SIGNALING_PATHWAY	GO_NOTCH_SIGNALING_PATHWAY		111	0.337454	1.43133	0.0388548	0.186438	1	5229	tags=28%, list=16%, signal=33%
GO_REGULATION_OF_RNA_STABILITY	GO_REGULATION_OF_RNA_STABILITY		134	0.415797	1.43119	0.123457	0.186461	1	5650	tags=35%, list=18%, signal=42%
GO_HEART_PROCESS	GO_HEART_PROCESS		82	0.359584	1.43088	0.062753	0.186629	1	4584	tags=28%, list=14%, signal=33%
GO_REGULATION_OF_CARDIAC_MUSCLE_CELL_ACTION_POTENTIAL	GO_REGULATION_OF_CARDIAC_MUSCLE_CELL_ACTION_POTENTIAL		19	0.477225	1.43062	0.0922432	0.186772	1	6520	tags=47%, list=21%, signal=60%
GO_REGULATION_OF_INNATE_IMMUNE_RESPONSE	GO_REGULATION_OF_INNATE_IMMUNE_RESPONSE		331	0.373687	1.43051	0.127273	0.186758	1	6085	tags=32%, list=19%, signal=40%
GO_DENDRITE_DEVELOPMENT	GO_DENDRITE_DEVELOPMENT		78	0.404059	1.43001	0.0897959	0.187124	1	3970	tags=24%, list=12%, signal=28%
GO_CARGO_RECEPTOR_ACTIVITY	GO_CARGO_RECEPTOR_ACTIVITY		60	0.3904	1.42993	0.0910973	0.187101	1	6914	tags=35%, list=22%, signal=45%
GO_ORGANELLE_DISASSEMBLY	GO_ORGANELLE_DISASSEMBLY		177	0.323924	1.42978	0.0346232	0.187149	1	5761	tags=33%, list=18%, signal=40%
GO_BONE_GROWTH	GO_BONE_GROWTH		20	0.487287	1.42951	0.101167	0.187297	1	4362	tags=40%, list=14%, signal=46%
GO_REGULATION_OF_CELL_MATURATION	GO_REGULATION_OF_CELL_MATURATION		18	0.488592	1.42947	0.0860656	0.187218	1	4552	tags=33%, list=14%, signal=39%
GO_CYTOPLASMIC_SIDE_OF_MEMBRANE	GO_CYTOPLASMIC_SIDE_OF_MEMBRANE		166	0.340834	1.42901	0.0603622	0.18752	1	3267	tags=21%, list=10%, signal=23%
GO_SOMATIC_RECOMBINATION_OF_IMMUNOGLOBULIN_GENE_SEGMENTS	GO_SOMATIC_RECOMBINATION_OF_IMMUNOGLOBULIN_GENE_SEGMENTS		21	0.51325	1.42893	0.106557	0.187501	1	3910	tags=43%, list=12%, signal=49%
GO_OVARIAN_FOLLICLE_DEVELOPMENT	GO_OVARIAN_FOLLICLE_DEVELOPMENT		55	0.358086	1.42879	0.0598291	0.187498	1	4829	tags=25%, list=15%, signal=30%
GO_RESPONSE_TO_INSULIN	GO_RESPONSE_TO_INSULIN		197	0.315371	1.42866	0.0426829	0.187524	1	5454	tags=28%, list=17%, signal=34%
GO_CILIARY_TRANSITION_ZONE	GO_CILIARY_TRANSITION_ZONE		23	0.579347	1.42837	0.12963	0.187723	1	1356	tags=30%, list=4%, signal=32%
GO_REGULATION_OF_RESPONSE_TO_WOUNDING	GO_REGULATION_OF_RESPONSE_TO_WOUNDING		396	0.334054	1.42825	0.0855397	0.187738	1	7251	tags=34%, list=23%, signal=44%
GO_GOLGI_CISTERNA	GO_GOLGI_CISTERNA		91	0.370802	1.42821	0.0852878	0.187655	1	6139	tags=37%, list=19%, signal=46%
GO_NEGATIVE_REGULATION_OF_RESPONSE_TO_WOUNDING	GO_NEGATIVE_REGULATION_OF_RESPONSE_TO_WOUNDING		149	0.343923	1.42806	0.0690335	0.187696	1	4464	tags=23%, list=14%, signal=26%
GO_REGULATION_OF_TRANSCRIPTION_FROM_RNA_POLYMERASE_II_PROMOTER_IN_RESPONSE_TO_HYPOXIA	GO_REGULATION_OF_TRANSCRIPTION_FROM_RNA_POLYMERASE_II_PROMOTER_IN_RESPONSE_TO_HYPOXIA		32	0.42569	1.42755	0.0982318	0.188063	1	7134	tags=44%, list=22%, signal=56%
GO_RESPONSE_TO_ENDOPLASMIC_RETICULUM_STRESS	GO_RESPONSE_TO_ENDOPLASMIC_RETICULUM_STRESS		221	0.379881	1.42663	0.105042	0.188828	1	3382	tags=27%, list=11%, signal=30%
GO_POSITIVE_REGULATION_OF_DEFENSE_RESPONSE	GO_POSITIVE_REGULATION_OF_DEFENSE_RESPONSE		349	0.367027	1.42545	0.120408	0.189853	1	7878	tags=41%, list=25%, signal=54%
GO_POSITIVE_REGULATION_OF_DENDRITE_MORPHOGENESIS	GO_POSITIVE_REGULATION_OF_DENDRITE_MORPHOGENESIS		32	0.437549	1.4245	0.0890688	0.19068	1	4754	tags=38%, list=15%, signal=44%
GO_POSITIVE_REGULATION_OF_CALCIUM_ION_TRANSMEMBRANE_TRANSPORT	GO_POSITIVE_REGULATION_OF_CALCIUM_ION_TRANSMEMBRANE_TRANSPORT		55	0.366874	1.42415	0.0791075	0.190892	1	4008	tags=24%, list=13%, signal=27%
GO_ERROR_FREE_TRANSLESION_SYNTHESIS	GO_ERROR_FREE_TRANSLESION_SYNTHESIS		18	0.559283	1.42402	0.144289	0.190916	1	3640	tags=39%, list=11%, signal=44%
GO_POSITIVE_REGULATION_OF_RESPONSE_TO_DNA_DAMAGE_STIMULUS	GO_POSITIVE_REGULATION_OF_RESPONSE_TO_DNA_DAMAGE_STIMULUS		59	0.381122	1.42393	0.0563674	0.190911	1	4314	tags=32%, list=14%, signal=37%
GO_PDZ_DOMAIN_BINDING	GO_PDZ_DOMAIN_BINDING		88	0.371272	1.42381	0.1	0.190935	1	4830	tags=30%, list=15%, signal=35%
GO_RNA_POLYMERASE_II_TRANSCRIPTION_COFACTOR_ACTIVITY	GO_RNA_POLYMERASE_II_TRANSCRIPTION_COFACTOR_ACTIVITY		88	0.345281	1.42367	0.0480167	0.190954	1	3739	tags=25%, list=12%, signal=28%
GO_NEGATIVE_REGULATION_OF_REGULATED_SECRETORY_PATHWAY	GO_NEGATIVE_REGULATION_OF_REGULATED_SECRETORY_PATHWAY		20	0.467867	1.42366	0.123506	0.190848	1	7592	tags=45%, list=24%, signal=59%
GO_RESPONSE_TO_DRUG	GO_RESPONSE_TO_DRUG		421	0.299632	1.42366	0.027027	0.190741	1	7257	tags=33%, list=23%, signal=43%
GO_CARTILAGE_DEVELOPMENT_INVOLVED_IN_ENDOCHONDRAL_BONE_MORPHOGENESIS	GO_CARTILAGE_DEVELOPMENT_INVOLVED_IN_ENDOCHONDRAL_BONE_MORPHOGENESIS		19	0.474504	1.42358	0.107784	0.190712	1	5490	tags=42%, list=17%, signal=51%
GO_REGULATION_OF_JNK_CASCADE	GO_REGULATION_OF_JNK_CASCADE		156	0.322721	1.42317	0.0432099	0.190987	1	4135	tags=24%, list=13%, signal=27%
GO_GLUCURONOSYLTRANSFERASE_ACTIVITY	GO_GLUCURONOSYLTRANSFERASE_ACTIVITY		29	0.456456	1.42268	0.0863158	0.191332	1	7761	tags=52%, list=24%, signal=68%
GO_CONDENSED_CHROMOSOME	GO_CONDENSED_CHROMOSOME		169	0.412617	1.42251	0.15	0.191387	1	6042	tags=43%, list=19%, signal=52%
GO_PURINE_NTP_DEPENDENT_HELICASE_ACTIVITY	GO_PURINE_NTP_DEPENDENT_HELICASE_ACTIVITY		96	0.382465	1.42201	0.121593	0.191738	1	3785	tags=31%, list=12%, signal=35%
GO_LIPID_PHOSPHORYLATION	GO_LIPID_PHOSPHORYLATION		97	0.349509	1.42172	0.0421053	0.191909	1	7889	tags=44%, list=25%, signal=59%
GO_MEMORY	GO_MEMORY		94	0.374934	1.42144	0.0674603	0.192087	1	5161	tags=29%, list=16%, signal=34%
GO_NEGATIVE_REGULATION_OF_SMALL_GTPASE_MEDIATED_SIGNAL_TRANSDUCTION	GO_NEGATIVE_REGULATION_OF_SMALL_GTPASE_MEDIATED_SIGNAL_TRANSDUCTION		40	0.402226	1.42101	0.0960334	0.192386	1	4701	tags=33%, list=15%, signal=38%
GO_PHAGOCYTOSIS_ENGULFMENT	GO_PHAGOCYTOSIS_ENGULFMENT		37	0.539819	1.42078	0.140625	0.192498	1	5277	tags=35%, list=17%, signal=42%
GO_EPIDERMAL_CELL_DIFFERENTIATION	GO_EPIDERMAL_CELL_DIFFERENTIATION		118	0.36705	1.42074	0.0739958	0.192436	1	3317	tags=20%, list=10%, signal=23%
GO_NUCLEAR_BODY	GO_NUCLEAR_BODY		334	0.329173	1.42013	0.103672	0.19295	1	4127	tags=29%, list=13%, signal=33%
GO_REGULATION_OF_MAST_CELL_DEGRANULATION	GO_REGULATION_OF_MAST_CELL_DEGRANULATION		31	0.448527	1.41973	0.107943	0.193254	1	3544	tags=35%, list=11%, signal=40%
GO_REGULATION_OF_MAST_CELL_ACTIVATION_INVOLVED_IN_IMMUNE_RESPONSE	GO_REGULATION_OF_MAST_CELL_ACTIVATION_INVOLVED_IN_IMMUNE_RESPONSE		31	0.448527	1.41973	0.107943	0.193143	1	3544	tags=35%, list=11%, signal=40%
GO_REGULATION_OF_ORGAN_FORMATION	GO_REGULATION_OF_ORGAN_FORMATION		32	0.415688	1.41972	0.0738397	0.19304	1	5289	tags=34%, list=17%, signal=41%
GO_DORSAL_VENTRAL_AXIS_SPECIFICATION	GO_DORSAL_VENTRAL_AXIS_SPECIFICATION		20	0.437263	1.41952	0.0910973	0.193148	1	3601	tags=25%, list=11%, signal=28%
GO_REGULATION_OF_LONG_TERM_SYNAPTIC_POTENTIATION	GO_REGULATION_OF_LONG_TERM_SYNAPTIC_POTENTIATION		19	0.51525	1.41948	0.133072	0.193075	1	5144	tags=37%, list=16%, signal=44%
GO_POSITIVE_REGULATION_OF_CELLULAR_RESPONSE_TO_INSULIN_STIMULUS	GO_POSITIVE_REGULATION_OF_CELLULAR_RESPONSE_TO_INSULIN_STIMULUS		22	0.445255	1.41921	0.0658683	0.193231	1	3193	tags=32%, list=10%, signal=35%
GO_REGULATION_OF_MYELOID_CELL_DIFFERENTIATION	GO_REGULATION_OF_MYELOID_CELL_DIFFERENTIATION		170	0.336197	1.41899	0.0632653	0.193339	1	4918	tags=26%, list=15%, signal=30%
GO_REGULATION_OF_MUSCLE_CONTRACTION	GO_REGULATION_OF_MUSCLE_CONTRACTION		144	0.358338	1.41896	0.0875764	0.193253	1	7036	tags=41%, list=22%, signal=52%
GO_KINESIN_BINDING	GO_KINESIN_BINDING		30	0.445505	1.41859	0.0723141	0.193499	1	5710	tags=47%, list=18%, signal=57%
GO_PROTEIN_PHOSPHATASE_2A_BINDING	GO_PROTEIN_PHOSPHATASE_2A_BINDING		27	0.452354	1.41854	0.100806	0.193452	1	6103	tags=37%, list=19%, signal=46%
GO_INTRINSIC_APOPTOTIC_SIGNALING_PATHWAY	GO_INTRINSIC_APOPTOTIC_SIGNALING_PATHWAY		148	0.32114	1.41817	0.0584551	0.193686	1	5906	tags=31%, list=19%, signal=38%
GO_POSITIVE_REGULATION_OF_PROTEIN_MODIFICATION_BY_SMALL_PROTEIN_CONJUGATION_OR_REMOVAL	GO_POSITIVE_REGULATION_OF_PROTEIN_MODIFICATION_BY_SMALL_PROTEIN_CONJUGATION_OR_REMOVAL		185	0.375472	1.41786	0.10856	0.193873	1	6877	tags=41%, list=22%, signal=52%
GO_METENCEPHALON_DEVELOPMENT	GO_METENCEPHALON_DEVELOPMENT		100	0.386031	1.41785	0.0858896	0.193773	1	4944	tags=31%, list=16%, signal=37%
GO_POSITIVE_REGULATION_OF_MRNA_METABOLIC_PROCESS	GO_POSITIVE_REGULATION_OF_MRNA_METABOLIC_PROCESS		42	0.399646	1.41739	0.0863158	0.194106	1	3615	tags=33%, list=11%, signal=38%
GO_NEGATIVE_REGULATION_OF_LEUKOCYTE_DIFFERENTIATION	GO_NEGATIVE_REGULATION_OF_LEUKOCYTE_DIFFERENTIATION		78	0.368509	1.41695	0.073922	0.194427	1	3358	tags=22%, list=11%, signal=24%
GO_REGULATION_OF_DNA_TEMPLATED_TRANSCRIPTION_IN_RESPONSE_TO_STRESS	GO_REGULATION_OF_DNA_TEMPLATED_TRANSCRIPTION_IN_RESPONSE_TO_STRESS		65	0.392251	1.41683	0.0886598	0.194426	1	6208	tags=35%, list=20%, signal=44%
GO_STEROL_TRANSPORTER_ACTIVITY	GO_STEROL_TRANSPORTER_ACTIVITY		17	0.574205	1.41643	0.0994036	0.194696	1	5393	tags=59%, list=17%, signal=71%
GO_CHEMOKINE_BINDING	GO_CHEMOKINE_BINDING		17	0.597488	1.41624	0.139394	0.194764	1	7654	tags=59%, list=24%, signal=77%
GO_REGULATION_OF_TRANSCRIPTION_REGULATORY_REGION_DNA_BINDING	GO_REGULATION_OF_TRANSCRIPTION_REGULATORY_REGION_DNA_BINDING		36	0.399038	1.41615	0.0675105	0.194727	1	7391	tags=50%, list=23%, signal=65%
GO_OXIDOREDUCTASE_ACTIVITY_ACTING_ON_PAIRED_DONORS_WITH_INCORPORATION_OR_REDUCTION_OF_MOLECULAR_OXYGEN	GO_OXIDOREDUCTASE_ACTIVITY_ACTING_ON_PAIRED_DONORS_WITH_INCORPORATION_OR_REDUCTION_OF_MOLECULAR_OXYGEN		147	0.307556	1.41554	0.0274262	0.195265	1	7277	tags=34%, list=23%, signal=44%
GO_SIGNAL_TRANSDUCTION_BY_P53_CLASS_MEDIATOR	GO_SIGNAL_TRANSDUCTION_BY_P53_CLASS_MEDIATOR		119	0.350628	1.4153	0.110429	0.195406	1	6717	tags=40%, list=21%, signal=51%
GO_POSITIVE_REGULATION_OF_PHOSPHATIDYLINOSITOL_3_KINASE_SIGNALING	GO_POSITIVE_REGULATION_OF_PHOSPHATIDYLINOSITOL_3_KINASE_SIGNALING		59	0.433478	1.4151	0.137214	0.195496	1	4464	tags=32%, list=14%, signal=37%
GO_PROXIMAL_DISTAL_PATTERN_FORMATION	GO_PROXIMAL_DISTAL_PATTERN_FORMATION		32	0.429613	1.41491	0.0787879	0.19557	1	7045	tags=38%, list=22%, signal=48%
GO_GTP_DEPENDENT_PROTEIN_BINDING	GO_GTP_DEPENDENT_PROTEIN_BINDING		17	0.46729	1.41478	0.102	0.195581	1	5563	tags=47%, list=18%, signal=57%
GO_MICROFILAMENT_MOTOR_ACTIVITY	GO_MICROFILAMENT_MOTOR_ACTIVITY		21	0.463233	1.41476	0.111801	0.195484	1	4708	tags=48%, list=15%, signal=56%
GO_RNA_POLYMERASE_II_CORE_BINDING	GO_RNA_POLYMERASE_II_CORE_BINDING		15	0.503962	1.41464	0.109091	0.195527	1	5108	tags=40%, list=16%, signal=48%
GO_POSITIVE_REGULATION_OF_PHOSPHOLIPASE_ACTIVITY	GO_POSITIVE_REGULATION_OF_PHOSPHOLIPASE_ACTIVITY		53	0.418006	1.41454	0.0881148	0.195501	1	5425	tags=36%, list=17%, signal=43%
GO_REGULATION_OF_AXONOGENESIS	GO_REGULATION_OF_AXONOGENESIS		163	0.349372	1.41443	0.0728745	0.195495	1	4414	tags=26%, list=14%, signal=30%
GO_PATTERN_RECOGNITION_RECEPTOR_SIGNALING_PATHWAY	GO_PATTERN_RECOGNITION_RECEPTOR_SIGNALING_PATHWAY		107	0.411906	1.4144	0.114108	0.195417	1	5859	tags=38%, list=18%, signal=47%
GO_REGULATION_OF_ENDOCRINE_PROCESS	GO_REGULATION_OF_ENDOCRINE_PROCESS		47	0.397215	1.41415	0.0469388	0.195554	1	6917	tags=40%, list=22%, signal=52%
GO_NEUROMUSCULAR_PROCESS_CONTROLLING_BALANCE	GO_NEUROMUSCULAR_PROCESS_CONTROLLING_BALANCE		48	0.448462	1.41381	0.122917	0.195793	1	4368	tags=31%, list=14%, signal=36%
GO_REGULATION_OF_EXTRINSIC_APOPTOTIC_SIGNALING_PATHWAY_VIA_DEATH_DOMAIN_RECEPTORS	GO_REGULATION_OF_EXTRINSIC_APOPTOTIC_SIGNALING_PATHWAY_VIA_DEATH_DOMAIN_RECEPTORS		54	0.4088	1.41298	0.0901639	0.196483	1	8230	tags=46%, list=26%, signal=62%
GO_POSITIVE_REGULATION_OF_CELL_CYCLE_G2_M_PHASE_TRANSITION	GO_POSITIVE_REGULATION_OF_CELL_CYCLE_G2_M_PHASE_TRANSITION		18	0.463873	1.41231	0.0840164	0.196996	1	6029	tags=50%, list=19%, signal=62%
GO_FEMALE_GENITALIA_DEVELOPMENT	GO_FEMALE_GENITALIA_DEVELOPMENT		16	0.477897	1.41198	0.0862423	0.197222	1	5290	tags=38%, list=17%, signal=45%
GO_UDP_GALACTOSYLTRANSFERASE_ACTIVITY	GO_UDP_GALACTOSYLTRANSFERASE_ACTIVITY		25	0.481213	1.41195	0.126087	0.197152	1	4109	tags=36%, list=13%, signal=41%
GO_REGULATION_OF_BLOOD_PRESSURE	GO_REGULATION_OF_BLOOD_PRESSURE		161	0.348522	1.4115	0.0621359	0.197492	1	3302	tags=20%, list=10%, signal=23%
GO_POSITIVE_REGULATION_OF_GLYCOPROTEIN_METABOLIC_PROCESS	GO_POSITIVE_REGULATION_OF_GLYCOPROTEIN_METABOLIC_PROCESS		17	0.500564	1.4111	0.0943026	0.197772	1	7746	tags=53%, list=24%, signal=70%
GO_REGULATION_OF_EXECUTION_PHASE_OF_APOPTOSIS	GO_REGULATION_OF_EXECUTION_PHASE_OF_APOPTOSIS		24	0.430113	1.41084	0.0926316	0.197927	1	3104	tags=21%, list=10%, signal=23%
GO_REGULATION_OF_RECEPTOR_RECYCLING	GO_REGULATION_OF_RECEPTOR_RECYCLING		19	0.447242	1.41048	0.0844794	0.198144	1	3476	tags=37%, list=11%, signal=41%
GO_TRANSCRIPTIONAL_REPRESSOR_ACTIVITY_RNA_POLYMERASE_II_TRANSCRIPTION_REGULATORY_REGION_SEQUENCE_SPECIFIC_BINDING	GO_TRANSCRIPTIONAL_REPRESSOR_ACTIVITY_RNA_POLYMERASE_II_TRANSCRIPTION_REGULATORY_REGION_SEQUENCE_SPECIFIC_BINDING		159	0.322353	1.41013	0.0493827	0.198379	1	6157	tags=35%, list=19%, signal=43%
GO_REGULATION_OF_STEROID_BIOSYNTHETIC_PROCESS	GO_REGULATION_OF_STEROID_BIOSYNTHETIC_PROCESS		48	0.357503	1.41002	0.0513834	0.198363	1	5000	tags=31%, list=16%, signal=37%
GO_MICROTUBULE_MOTOR_ACTIVITY	GO_MICROTUBULE_MOTOR_ACTIVITY		75	0.389663	1.40979	0.0911017	0.198463	1	5341	tags=39%, list=17%, signal=46%
GO_RESPONSE_TO_TOPOLOGICALLY_INCORRECT_PROTEIN	GO_RESPONSE_TO_TOPOLOGICALLY_INCORRECT_PROTEIN		155	0.388242	1.40954	0.122449	0.198579	1	3370	tags=28%, list=11%, signal=32%
GO_REGULATION_OF_CALCIUM_ION_TRANSMEMBRANE_TRANSPORT	GO_REGULATION_OF_CALCIUM_ION_TRANSMEMBRANE_TRANSPORT		109	0.345253	1.40929	0.0866935	0.198706	1	7109	tags=35%, list=22%, signal=45%
GO_RESPONSE_TO_ANTIBIOTIC	GO_RESPONSE_TO_ANTIBIOTIC		45	0.385638	1.40919	0.0953347	0.198697	1	2783	tags=24%, list=9%, signal=27%
GO_ENDOCRINE_PROCESS	GO_ENDOCRINE_PROCESS		43	0.419136	1.40866	0.0804598	0.199136	1	3686	tags=26%, list=12%, signal=29%
GO_RETINOID_X_RECEPTOR_BINDING	GO_RETINOID_X_RECEPTOR_BINDING		17	0.498522	1.40852	0.134021	0.199138	1	4822	tags=47%, list=15%, signal=55%
GO_GLIAL_CELL_DIFFERENTIATION	GO_GLIAL_CELL_DIFFERENTIATION		131	0.336529	1.40837	0.0516529	0.199185	1	5866	tags=31%, list=18%, signal=37%
GO_CELL_DIFFERENTIATION_INVOLVED_IN_EMBRYONIC_PLACENTA_DEVELOPMENT	GO_CELL_DIFFERENTIATION_INVOLVED_IN_EMBRYONIC_PLACENTA_DEVELOPMENT		25	0.49324	1.40795	0.120833	0.199461	1	8863	tags=48%, list=28%, signal=67%
GO_SCAVENGER_RECEPTOR_ACTIVITY	GO_SCAVENGER_RECEPTOR_ACTIVITY		39	0.412889	1.40726	0.0939457	0.200041	1	6819	tags=33%, list=21%, signal=42%
GO_CILIARY_TIP	GO_CILIARY_TIP		42	0.448665	1.40698	0.131313	0.200225	1	8794	tags=62%, list=28%, signal=85%
GO_LENS_FIBER_CELL_DIFFERENTIATION	GO_LENS_FIBER_CELL_DIFFERENTIATION		24	0.447832	1.40696	0.1	0.200142	1	8730	tags=63%, list=27%, signal=86%
GO_REGULATION_OF_FATTY_ACID_METABOLIC_PROCESS	GO_REGULATION_OF_FATTY_ACID_METABOLIC_PROCESS		84	0.359256	1.40656	0.0958084	0.200463	1	5566	tags=38%, list=18%, signal=46%
GO_REGULATION_OF_VESICLE_FUSION	GO_REGULATION_OF_VESICLE_FUSION		57	0.36419	1.4059	0.0759754	0.201017	1	4926	tags=30%, list=16%, signal=35%
GO_LIPID_PARTICLE	GO_LIPID_PARTICLE		60	0.388265	1.40583	0.0909091	0.200963	1	6795	tags=42%, list=21%, signal=53%
GO_PRONUCLEUS	GO_PRONUCLEUS		15	0.575931	1.40553	0.164927	0.201147	1	3475	tags=40%, list=11%, signal=45%
GO_POTASSIUM_CHANNEL_REGULATOR_ACTIVITY	GO_POTASSIUM_CHANNEL_REGULATOR_ACTIVITY		44	0.385141	1.40529	0.0688976	0.201256	1	6985	tags=39%, list=22%, signal=49%
GO_CELLULAR_RESPONSE_TO_AMINO_ACID_STARVATION	GO_CELLULAR_RESPONSE_TO_AMINO_ACID_STARVATION		24	0.432966	1.40524	0.0828402	0.201209	1	5298	tags=42%, list=17%, signal=50%
GO_MEMBRANE_LIPID_CATABOLIC_PROCESS	GO_MEMBRANE_LIPID_CATABOLIC_PROCESS		23	0.467571	1.40431	0.0891089	0.202072	1	7078	tags=43%, list=22%, signal=56%
GO_SECRETORY_GRANULE_MEMBRANE	GO_SECRETORY_GRANULE_MEMBRANE		75	0.366459	1.4042	0.0745098	0.202038	1	5365	tags=36%, list=17%, signal=43%
GO_DESMOSOME	GO_DESMOSOME		26	0.491727	1.40262	0.153173	0.203635	1	7208	tags=54%, list=23%, signal=70%
GO_INFLAMMATORY_RESPONSE_TO_ANTIGENIC_STIMULUS	GO_INFLAMMATORY_RESPONSE_TO_ANTIGENIC_STIMULUS		24	0.458776	1.40243	0.119843	0.203724	1	7775	tags=50%, list=24%, signal=66%
GO_POSITIVE_REGULATION_OF_LAMELLIPODIUM_ORGANIZATION	GO_POSITIVE_REGULATION_OF_LAMELLIPODIUM_ORGANIZATION		21	0.476446	1.40213	0.122661	0.203945	1	2783	tags=29%, list=9%, signal=31%
GO_REGULATION_OF_MACROPHAGE_DERIVED_FOAM_CELL_DIFFERENTIATION	GO_REGULATION_OF_MACROPHAGE_DERIVED_FOAM_CELL_DIFFERENTIATION		28	0.440024	1.40097	0.0912863	0.204968	1	3302	tags=29%, list=10%, signal=32%
GO_CELLULAR_EXTRAVASATION	GO_CELLULAR_EXTRAVASATION		24	0.534029	1.40093	0.148374	0.204899	1	5019	tags=33%, list=16%, signal=40%
GO_REGULATION_OF_LEUKOCYTE_DEGRANULATION	GO_REGULATION_OF_LEUKOCYTE_DEGRANULATION		41	0.418326	1.40089	0.115854	0.204828	1	3544	tags=29%, list=11%, signal=33%
GO_HISTONE_PHOSPHORYLATION	GO_HISTONE_PHOSPHORYLATION		24	0.471454	1.40081	0.144554	0.204799	1	7483	tags=54%, list=24%, signal=71%
GO_POSITIVE_REGULATION_OF_DNA_REPLICATION	GO_POSITIVE_REGULATION_OF_DNA_REPLICATION		84	0.368084	1.40081	0.116034	0.204686	1	7828	tags=49%, list=25%, signal=65%
GO_SERINE_TYPE_EXOPEPTIDASE_ACTIVITY	GO_SERINE_TYPE_EXOPEPTIDASE_ACTIVITY		18	0.474883	1.40015	0.105906	0.205284	1	5428	tags=44%, list=17%, signal=54%
GO_CYCLASE_ACTIVITY	GO_CYCLASE_ACTIVITY		19	0.496048	1.39953	0.0865191	0.205809	1	6378	tags=53%, list=20%, signal=66%
GO_POSITIVE_REGULATION_OF_SMOOTH_MUSCLE_CELL_PROLIFERATION	GO_POSITIVE_REGULATION_OF_SMOOTH_MUSCLE_CELL_PROLIFERATION		60	0.40249	1.39944	0.114823	0.205785	1	8587	tags=55%, list=27%, signal=75%
GO_AGGRESOME	GO_AGGRESOME		31	0.398298	1.39927	0.0798226	0.205848	1	3678	tags=32%, list=12%, signal=36%
GO_NUCLEAR_TRANSCRIBED_MRNA_POLY_A_TAIL_SHORTENING	GO_NUCLEAR_TRANSCRIBED_MRNA_POLY_A_TAIL_SHORTENING		23	0.48415	1.39907	0.126338	0.205925	1	5529	tags=48%, list=17%, signal=58%
GO_RESPONSE_TO_FOLIC_ACID	GO_RESPONSE_TO_FOLIC_ACID		15	0.480781	1.39772	0.0755467	0.207143	1	4380	tags=40%, list=14%, signal=46%
GO_IMPORT_INTO_CELL	GO_IMPORT_INTO_CELL		37	0.385113	1.39702	0.0846457	0.207702	1	10066	tags=62%, list=32%, signal=91%
GO_POSITIVE_REGULATION_OF_EPIDERMAL_CELL_DIFFERENTIATION	GO_POSITIVE_REGULATION_OF_EPIDERMAL_CELL_DIFFERENTIATION		19	0.446646	1.39698	0.0854167	0.20762	1	3878	tags=32%, list=12%, signal=36%
GO_SOMATIC_STEM_CELL_POPULATION_MAINTENANCE	GO_SOMATIC_STEM_CELL_POPULATION_MAINTENANCE		62	0.353213	1.39693	0.0511727	0.207553	1	7864	tags=44%, list=25%, signal=58%
GO_REGULATION_OF_T_CELL_CYTOKINE_PRODUCTION	GO_REGULATION_OF_T_CELL_CYTOKINE_PRODUCTION		20	0.514131	1.39665	0.145709	0.207736	1	7109	tags=45%, list=22%, signal=58%
GO_SULFUR_COMPOUND_METABOLIC_PROCESS	GO_SULFUR_COMPOUND_METABOLIC_PROCESS		345	0.312655	1.39567	0.0684647	0.208677	1	5988	tags=28%, list=19%, signal=34%
GO_FATTY_ACID_TRANSPORT	GO_FATTY_ACID_TRANSPORT		54	0.369261	1.39512	0.0859375	0.209132	1	6906	tags=41%, list=22%, signal=52%
GO_PROTEIN_STABILIZATION	GO_PROTEIN_STABILIZATION		127	0.329178	1.39506	0.0617284	0.209074	1	7267	tags=42%, list=23%, signal=54%
GO_NEGATIVE_REGULATION_OF_CYTOKINE_SECRETION	GO_NEGATIVE_REGULATION_OF_CYTOKINE_SECRETION		40	0.455684	1.3949	0.147436	0.209151	1	4226	tags=25%, list=13%, signal=29%
GO_REGULATION_OF_TYPE_2_IMMUNE_RESPONSE	GO_REGULATION_OF_TYPE_2_IMMUNE_RESPONSE		23	0.516169	1.39464	0.124224	0.2093	1	9282	tags=61%, list=29%, signal=86%
GO_NEUROEPITHELIAL_CELL_DIFFERENTIATION	GO_NEUROEPITHELIAL_CELL_DIFFERENTIATION		60	0.34553	1.39435	0.0554415	0.209513	1	4135	tags=27%, list=13%, signal=31%
GO_MELANOCYTE_DIFFERENTIATION	GO_MELANOCYTE_DIFFERENTIATION		17	0.467473	1.39332	0.112621	0.210464	1	4064	tags=35%, list=13%, signal=40%
GO_NEGATIVE_REGULATION_OF_NF_KAPPAB_IMPORT_INTO_NUCLEUS	GO_NEGATIVE_REGULATION_OF_NF_KAPPAB_IMPORT_INTO_NUCLEUS		17	0.460245	1.39274	0.133201	0.21094	1	8943	tags=65%, list=28%, signal=90%
GO_LIGAND_DEPENDENT_NUCLEAR_RECEPTOR_BINDING	GO_LIGAND_DEPENDENT_NUCLEAR_RECEPTOR_BINDING		23	0.464582	1.39189	0.13786	0.211684	1	5551	tags=48%, list=17%, signal=58%
GO_PIGMENT_GRANULE_LOCALIZATION	GO_PIGMENT_GRANULE_LOCALIZATION		23	0.441581	1.39152	0.112735	0.211929	1	5390	tags=43%, list=17%, signal=52%
GO_HISTONE_DEACETYLASE_BINDING	GO_HISTONE_DEACETYLASE_BINDING		102	0.329927	1.39089	0.0647948	0.212478	1	4111	tags=27%, list=13%, signal=31%
GO_TRANSFERASE_ACTIVITY_TRANSFERRING_PENTOSYL_GROUPS	GO_TRANSFERASE_ACTIVITY_TRANSFERRING_PENTOSYL_GROUPS		51	0.35852	1.39076	0.0761317	0.212508	1	6635	tags=39%, list=21%, signal=49%
GO_CELLULAR_COMPONENT_ASSEMBLY_INVOLVED_IN_MORPHOGENESIS	GO_CELLULAR_COMPONENT_ASSEMBLY_INVOLVED_IN_MORPHOGENESIS		217	0.364855	1.39075	0.131799	0.212401	1	6105	tags=35%, list=19%, signal=44%
GO_RESPONSE_TO_VITAMIN_D	GO_RESPONSE_TO_VITAMIN_D		32	0.418667	1.39017	0.0934959	0.21292	1	5161	tags=31%, list=16%, signal=37%
GO_NEGATIVE_REGULATION_OF_GROWTH	GO_NEGATIVE_REGULATION_OF_GROWTH		227	0.296075	1.39005	0.0359281	0.212914	1	6536	tags=30%, list=21%, signal=38%
GO_MICROTUBULE_BASED_MOVEMENT	GO_MICROTUBULE_BASED_MOVEMENT		192	0.360024	1.38978	0.102249	0.213072	1	5162	tags=33%, list=16%, signal=40%
GO_NEGATIVE_REGULATION_OF_MUSCLE_CELL_APOPTOTIC_PROCESS	GO_NEGATIVE_REGULATION_OF_MUSCLE_CELL_APOPTOTIC_PROCESS		30	0.382943	1.38971	0.0688976	0.213029	1	4748	tags=33%, list=15%, signal=39%
GO_NEGATIVE_REGULATION_OF_BLOOD_CIRCULATION	GO_NEGATIVE_REGULATION_OF_BLOOD_CIRCULATION		33	0.421802	1.38932	0.10998	0.213281	1	4584	tags=30%, list=14%, signal=35%
GO_BHLH_TRANSCRIPTION_FACTOR_BINDING	GO_BHLH_TRANSCRIPTION_FACTOR_BINDING		27	0.412722	1.38912	0.0863158	0.213401	1	5319	tags=41%, list=17%, signal=49%
GO_REGULATION_OF_PHOSPHOLIPASE_C_ACTIVITY	GO_REGULATION_OF_PHOSPHOLIPASE_C_ACTIVITY		39	0.456987	1.38897	0.118503	0.213423	1	5425	tags=38%, list=17%, signal=46%
GO_NEURON_SPINE	GO_NEURON_SPINE		116	0.36433	1.38866	0.105788	0.213612	1	4269	tags=25%, list=13%, signal=29%
GO_RESPONSE_TO_KETONE	GO_RESPONSE_TO_KETONE		178	0.308773	1.38861	0.0501044	0.213559	1	4822	tags=24%, list=15%, signal=28%
GO_NEURON_RECOGNITION	GO_NEURON_RECOGNITION		32	0.474909	1.3885	0.171756	0.213547	1	4854	tags=34%, list=15%, signal=41%
GO_NEGATIVE_REGULATION_OF_DEVELOPMENTAL_GROWTH	GO_NEGATIVE_REGULATION_OF_DEVELOPMENTAL_GROWTH		83	0.342843	1.38834	0.06639	0.213616	1	6957	tags=34%, list=22%, signal=43%
GO_STRIATUM_DEVELOPMENT	GO_STRIATUM_DEVELOPMENT		16	0.464156	1.38817	0.0992063	0.213686	1	5927	tags=44%, list=19%, signal=54%
GO_REGULATION_OF_MESODERM_DEVELOPMENT	GO_REGULATION_OF_MESODERM_DEVELOPMENT		15	0.464336	1.38785	0.104126	0.213894	1	2469	tags=27%, list=8%, signal=29%
GO_APOLIPOPROTEIN_BINDING	GO_APOLIPOPROTEIN_BINDING		15	0.484279	1.38782	0.0988142	0.213817	1	2606	tags=27%, list=8%, signal=29%
GO_PROTEIN_PHOSPHORYLATED_AMINO_ACID_BINDING	GO_PROTEIN_PHOSPHORYLATED_AMINO_ACID_BINDING		24	0.435372	1.38731	0.116732	0.214236	1	4632	tags=33%, list=15%, signal=39%
GO_CELLULAR_RESPONSE_TO_HEAT	GO_CELLULAR_RESPONSE_TO_HEAT		33	0.443433	1.38661	0.110204	0.214852	1	8831	tags=58%, list=28%, signal=80%
GO_ENDOCYTIC_RECYCLING	GO_ENDOCYTIC_RECYCLING		23	0.410499	1.38618	0.0914894	0.215212	1	7219	tags=43%, list=23%, signal=56%
GO_POSITIVE_REGULATION_OF_DNA_REPAIR	GO_POSITIVE_REGULATION_OF_DNA_REPAIR		34	0.427921	1.38616	0.121951	0.215124	1	4100	tags=35%, list=13%, signal=40%
GO_CHROMATIN_REMODELING	GO_CHROMATIN_REMODELING		138	0.34524	1.38581	0.125514	0.215396	1	5845	tags=33%, list=18%, signal=41%
GO_NEGATIVE_REGULATION_OF_INTERFERON_GAMMA_PRODUCTION	GO_NEGATIVE_REGULATION_OF_INTERFERON_GAMMA_PRODUCTION		33	0.465045	1.38562	0.137097	0.215491	1	8724	tags=58%, list=27%, signal=79%
GO_NUCLEAR_REPLICATION_FORK	GO_NUCLEAR_REPLICATION_FORK		39	0.470069	1.38558	0.15	0.215418	1	4085	tags=41%, list=13%, signal=47%
GO_DEATH_RECEPTOR_BINDING	GO_DEATH_RECEPTOR_BINDING		16	0.492231	1.38539	0.124481	0.215483	1	4900	tags=31%, list=15%, signal=37%
GO_REGULATION_OF_PROTEIN_SUMOYLATION	GO_REGULATION_OF_PROTEIN_SUMOYLATION		19	0.436498	1.38527	0.0943775	0.215483	1	2913	tags=32%, list=9%, signal=35%
GO_EXTRINSIC_COMPONENT_OF_ORGANELLE_MEMBRANE	GO_EXTRINSIC_COMPONENT_OF_ORGANELLE_MEMBRANE		22	0.435076	1.38503	0.109015	0.215613	1	3228	tags=32%, list=10%, signal=35%
GO_NEGATIVE_REGULATION_OF_DNA_REPLICATION	GO_NEGATIVE_REGULATION_OF_DNA_REPLICATION		51	0.383487	1.38497	0.123967	0.215554	1	6412	tags=39%, list=20%, signal=49%
GO_CELLULAR_RESPONSE_TO_GROWTH_HORMONE_STIMULUS	GO_CELLULAR_RESPONSE_TO_GROWTH_HORMONE_STIMULUS		18	0.502863	1.38465	0.142285	0.21575	1	7238	tags=50%, list=23%, signal=65%
GO_REGULATION_OF_ERAD_PATHWAY	GO_REGULATION_OF_ERAD_PATHWAY		26	0.435912	1.38405	0.120654	0.216308	1	2620	tags=31%, list=8%, signal=34%
GO_ION_CHANNEL_BINDING	GO_ION_CHANNEL_BINDING		106	0.344843	1.38345	0.100604	0.216844	1	7015	tags=37%, list=22%, signal=47%
GO_REGULATION_OF_CELLULAR_KETONE_METABOLIC_PROCESS	GO_REGULATION_OF_CELLULAR_KETONE_METABOLIC_PROCESS		167	0.342931	1.38331	0.0979167	0.216864	1	5566	tags=33%, list=18%, signal=40%
GO_INSULIN_LIKE_GROWTH_FACTOR_RECEPTOR_BINDING	GO_INSULIN_LIKE_GROWTH_FACTOR_RECEPTOR_BINDING		15	0.474553	1.38322	0.074	0.216842	1	4385	tags=33%, list=14%, signal=39%
GO_REGULATION_OF_MYELOID_LEUKOCYTE_DIFFERENTIATION	GO_REGULATION_OF_MYELOID_LEUKOCYTE_DIFFERENTIATION		99	0.346018	1.38244	0.0981964	0.217553	1	4114	tags=24%, list=13%, signal=28%
GO_REGULATION_OF_HOMEOSTATIC_PROCESS	GO_REGULATION_OF_HOMEOSTATIC_PROCESS		427	0.288469	1.3821	0.0604839	0.217798	1	5759	tags=27%, list=18%, signal=33%
GO_RESPONSE_TO_EXTRACELLULAR_STIMULUS	GO_RESPONSE_TO_EXTRACELLULAR_STIMULUS		423	0.291092	1.38142	0.0233051	0.218364	1	5466	tags=26%, list=17%, signal=31%
GO_NEGATIVE_REGULATION_OF_EPITHELIAL_CELL_APOPTOTIC_PROCESS	GO_NEGATIVE_REGULATION_OF_EPITHELIAL_CELL_APOPTOTIC_PROCESS		34	0.409674	1.38061	0.0967742	0.219115	1	4464	tags=29%, list=14%, signal=34%
GO_CARDIAC_EPITHELIAL_TO_MESENCHYMAL_TRANSITION	GO_CARDIAC_EPITHELIAL_TO_MESENCHYMAL_TRANSITION		24	0.455419	1.38057	0.107356	0.219036	1	5674	tags=42%, list=18%, signal=51%
GO_POSITIVE_REGULATION_OF_EXOCYTOSIS	GO_POSITIVE_REGULATION_OF_EXOCYTOSIS		80	0.343477	1.38015	0.0658683	0.219359	1	5391	tags=30%, list=17%, signal=36%
GO_FEMALE_MEIOTIC_DIVISION	GO_FEMALE_MEIOTIC_DIVISION		24	0.461506	1.38014	0.12963	0.219253	1	7564	tags=54%, list=24%, signal=71%
GO_MYOSIN_BINDING	GO_MYOSIN_BINDING		58	0.356035	1.38008	0.0775681	0.219199	1	6603	tags=43%, list=21%, signal=54%
GO_NEGATIVE_REGULATION_OF_RECEPTOR_MEDIATED_ENDOCYTOSIS	GO_NEGATIVE_REGULATION_OF_RECEPTOR_MEDIATED_ENDOCYTOSIS		17	0.473479	1.37983	0.11412	0.219344	1	1393	tags=24%, list=4%, signal=25%
GO_REGULATION_OF_CELL_MIGRATION_INVOLVED_IN_SPROUTING_ANGIOGENESIS	GO_REGULATION_OF_CELL_MIGRATION_INVOLVED_IN_SPROUTING_ANGIOGENESIS		19	0.462195	1.37981	0.132411	0.219266	1	5161	tags=37%, list=16%, signal=44%
GO_PROTEIN_PEPTIDYL_PROLYL_ISOMERIZATION	GO_PROTEIN_PEPTIDYL_PROLYL_ISOMERIZATION		36	0.412165	1.37973	0.114053	0.219227	1	4471	tags=33%, list=14%, signal=39%
GO_REPLICATION_FORK	GO_REPLICATION_FORK		62	0.454622	1.37972	0.185185	0.219131	1	4222	tags=39%, list=13%, signal=45%
GO_IMMUNE_RESPONSE_REGULATING_CELL_SURFACE_RECEPTOR_SIGNALING_PATHWAY	GO_IMMUNE_RESPONSE_REGULATING_CELL_SURFACE_RECEPTOR_SIGNALING_PATHWAY		314	0.380928	1.37967	0.182879	0.219081	1	5726	tags=31%, list=18%, signal=37%
GO_RESPONSE_TO_HYPEROXIA	GO_RESPONSE_TO_HYPEROXIA		23	0.443939	1.37905	0.134172	0.219615	1	3582	tags=39%, list=11%, signal=44%
GO_RESPONSE_TO_INCREASED_OXYGEN_LEVELS	GO_RESPONSE_TO_INCREASED_OXYGEN_LEVELS		23	0.443939	1.37905	0.134172	0.219497	1	3582	tags=39%, list=11%, signal=44%
GO_NEURAL_NUCLEUS_DEVELOPMENT	GO_NEURAL_NUCLEUS_DEVELOPMENT		65	0.392678	1.37891	0.124248	0.219523	1	3177	tags=23%, list=10%, signal=26%
GO_G1_DNA_DAMAGE_CHECKPOINT	GO_G1_DNA_DAMAGE_CHECKPOINT		68	0.387582	1.37862	0.141988	0.219711	1	6146	tags=40%, list=19%, signal=49%
GO_NEGATIVE_REGULATION_OF_IMMUNE_EFFECTOR_PROCESS	GO_NEGATIVE_REGULATION_OF_IMMUNE_EFFECTOR_PROCESS		98	0.382869	1.37846	0.123431	0.219784	1	7155	tags=35%, list=23%, signal=45%
GO_MEGAKARYOCYTE_DIFFERENTIATION	GO_MEGAKARYOCYTE_DIFFERENTIATION		20	0.504912	1.37825	0.156187	0.219892	1	7679	tags=55%, list=24%, signal=72%
GO_REGULATED_EXOCYTOSIS	GO_REGULATED_EXOCYTOSIS		212	0.314126	1.37785	0.0598802	0.220151	1	5420	tags=27%, list=17%, signal=32%
GO_REGULATION_OF_EPITHELIAL_CELL_DIFFERENTIATION_INVOLVED_IN_KIDNEY_DEVELOPMENT	GO_REGULATION_OF_EPITHELIAL_CELL_DIFFERENTIATION_INVOLVED_IN_KIDNEY_DEVELOPMENT		15	0.518502	1.3776	0.154876	0.220308	1	3344	tags=33%, list=11%, signal=37%
GO_BETA_CATENIN_TCF_COMPLEX_ASSEMBLY	GO_BETA_CATENIN_TCF_COMPLEX_ASSEMBLY		38	0.416125	1.37737	0.13347	0.220414	1	4518	tags=29%, list=14%, signal=34%
GO_NEGATIVE_REGULATION_OF_EPITHELIAL_TO_MESENCHYMAL_TRANSITION	GO_NEGATIVE_REGULATION_OF_EPITHELIAL_TO_MESENCHYMAL_TRANSITION		22	0.413222	1.37669	0.0918164	0.221042	1	2243	tags=27%, list=7%, signal=29%
GO_POSITIVE_REGULATION_OF_VIRAL_PROCESS	GO_POSITIVE_REGULATION_OF_VIRAL_PROCESS		85	0.384109	1.37649	0.131148	0.221144	1	6818	tags=41%, list=21%, signal=52%
GO_REGULATION_OF_I_KAPPAB_KINASE_NF_KAPPAB_SIGNALING	GO_REGULATION_OF_I_KAPPAB_KINASE_NF_KAPPAB_SIGNALING		229	0.326596	1.37617	0.0841683	0.221371	1	5459	tags=29%, list=17%, signal=35%
GO_PHOSPHORIC_ESTER_HYDROLASE_ACTIVITY	GO_PHOSPHORIC_ESTER_HYDROLASE_ACTIVITY		342	0.291028	1.37589	0.0628931	0.221525	1	5692	tags=29%, list=18%, signal=35%
GO_MEMBRANE_FUSION	GO_MEMBRANE_FUSION		142	0.310787	1.3758	0.0613861	0.221505	1	6407	tags=35%, list=20%, signal=44%
GO_RESPONSE_TO_CADMIUM_ION	GO_RESPONSE_TO_CADMIUM_ION		39	0.410586	1.37521	0.123288	0.221985	1	7805	tags=41%, list=25%, signal=54%
GO_PROTEIN_TYROSINE_KINASE_ACTIVATOR_ACTIVITY	GO_PROTEIN_TYROSINE_KINASE_ACTIVATOR_ACTIVITY		15	0.494068	1.37501	0.135729	0.222077	1	2945	tags=20%, list=9%, signal=22%
GO_SINGLE_STRANDED_RNA_BINDING	GO_SINGLE_STRANDED_RNA_BINDING		62	0.355923	1.37473	0.114625	0.222252	1	6818	tags=44%, list=21%, signal=55%
GO_DENDRITIC_SPINE_DEVELOPMENT	GO_DENDRITIC_SPINE_DEVELOPMENT		19	0.470175	1.3746	0.114458	0.222246	1	5403	tags=37%, list=17%, signal=44%
GO_HYALURONIC_ACID_BINDING	GO_HYALURONIC_ACID_BINDING		20	0.497593	1.37429	0.126761	0.222453	1	1242	tags=25%, list=4%, signal=26%
GO_RNA_POLYMERASE_II_TRANSCRIPTION_COACTIVATOR_ACTIVITY	GO_RNA_POLYMERASE_II_TRANSCRIPTION_COACTIVATOR_ACTIVITY		35	0.400329	1.37299	0.105906	0.223759	1	5607	tags=40%, list=18%, signal=49%
GO_RECEPTOR_AGONIST_ACTIVITY	GO_RECEPTOR_AGONIST_ACTIVITY		15	0.502379	1.37292	0.1167	0.223709	1	1202	tags=27%, list=4%, signal=28%
GO_ACTIVATION_OF_MAPK_ACTIVITY	GO_ACTIVATION_OF_MAPK_ACTIVITY		132	0.324602	1.37268	0.0657084	0.223846	1	5537	tags=31%, list=17%, signal=37%
GO_REGULATION_OF_DOUBLE_STRAND_BREAK_REPAIR_VIA_HOMOLOGOUS_RECOMBINATION	GO_REGULATION_OF_DOUBLE_STRAND_BREAK_REPAIR_VIA_HOMOLOGOUS_RECOMBINATION		17	0.480774	1.37219	0.162218	0.224226	1	7824	tags=65%, list=25%, signal=86%
GO_CELLULAR_CARBOHYDRATE_CATABOLIC_PROCESS	GO_CELLULAR_CARBOHYDRATE_CATABOLIC_PROCESS		31	0.421204	1.3711	0.0992063	0.225199	1	8661	tags=55%, list=27%, signal=75%
GO_PROTEIN_KINASE_A_CATALYTIC_SUBUNIT_BINDING	GO_PROTEIN_KINASE_A_CATALYTIC_SUBUNIT_BINDING		15	0.47063	1.37078	0.128631	0.22545	1	3135	tags=27%, list=10%, signal=30%
GO_ENDOSOME_TO_LYSOSOME_TRANSPORT	GO_ENDOSOME_TO_LYSOSOME_TRANSPORT		40	0.38462	1.37077	0.134298	0.225347	1	5849	tags=40%, list=18%, signal=49%
GO_DNA_REPLICATION_FACTOR_A_COMPLEX	GO_DNA_REPLICATION_FACTOR_A_COMPLEX		15	0.483933	1.37042	0.129412	0.225577	1	5192	tags=53%, list=16%, signal=64%
GO_REGULATION_OF_CARBOHYDRATE_BIOSYNTHETIC_PROCESS	GO_REGULATION_OF_CARBOHYDRATE_BIOSYNTHETIC_PROCESS		80	0.331407	1.36997	0.063655	0.225994	1	4480	tags=28%, list=14%, signal=32%
GO_POSITIVE_REGULATION_OF_RESPONSE_TO_CYTOKINE_STIMULUS	GO_POSITIVE_REGULATION_OF_RESPONSE_TO_CYTOKINE_STIMULUS		32	0.414543	1.36987	0.128	0.225972	1	6021	tags=41%, list=19%, signal=50%
GO_MEIOTIC_CELL_CYCLE_PROCESS	GO_MEIOTIC_CELL_CYCLE_PROCESS		128	0.354839	1.36985	0.168357	0.225879	1	7297	tags=43%, list=23%, signal=56%
GO_DNA_REPAIR	GO_DNA_REPAIR		440	0.342355	1.3698	0.1625	0.225809	1	5997	tags=37%, list=19%, signal=45%
GO_REGULATION_OF_CALCIUM_MEDIATED_SIGNALING	GO_REGULATION_OF_CALCIUM_MEDIATED_SIGNALING		74	0.381926	1.36964	0.125245	0.225856	1	5436	tags=31%, list=17%, signal=37%
GO_SARCOPLASM	GO_SARCOPLASM		65	0.387364	1.36915	0.129225	0.22628	1	4575	tags=29%, list=14%, signal=34%
GO_T_TUBULE	GO_T_TUBULE		45	0.404898	1.36898	0.110429	0.226354	1	5677	tags=33%, list=18%, signal=41%
GO_MONOSACCHARIDE_BINDING	GO_MONOSACCHARIDE_BINDING		64	0.369031	1.3686	0.113684	0.226592	1	4026	tags=30%, list=13%, signal=34%
GO_NEGATIVE_REGULATION_OF_HYDROLASE_ACTIVITY	GO_NEGATIVE_REGULATION_OF_HYDROLASE_ACTIVITY		366	0.274062	1.36846	0.0232558	0.226629	1	4214	tags=20%, list=13%, signal=23%
GO_MULTICELLULAR_ORGANISMAL_HOMEOSTASIS	GO_MULTICELLULAR_ORGANISMAL_HOMEOSTASIS		253	0.286829	1.36822	0.0377359	0.22677	1	7980	tags=34%, list=25%, signal=46%
GO_PROTEIN_DESTABILIZATION	GO_PROTEIN_DESTABILIZATION		33	0.401135	1.36798	0.11359	0.22692	1	5984	tags=45%, list=19%, signal=56%
GO_NEGATIVE_REGULATION_OF_STRIATED_MUSCLE_CELL_APOPTOTIC_PROCESS	GO_NEGATIVE_REGULATION_OF_STRIATED_MUSCLE_CELL_APOPTOTIC_PROCESS		17	0.446366	1.36768	0.113006	0.227115	1	6919	tags=47%, list=22%, signal=60%
GO_ACTIVATION_OF_IMMUNE_RESPONSE	GO_ACTIVATION_OF_IMMUNE_RESPONSE		413	0.375498	1.36761	0.157576	0.227067	1	5773	tags=31%, list=18%, signal=38%
GO_TRANSITION_METAL_ION_TRANSMEMBRANE_TRANSPORTER_ACTIVITY	GO_TRANSITION_METAL_ION_TRANSMEMBRANE_TRANSPORTER_ACTIVITY		39	0.4054	1.36748	0.112766	0.227094	1	5904	tags=38%, list=19%, signal=47%
GO_HISTONE_H2A_ACETYLATION	GO_HISTONE_H2A_ACETYLATION		15	0.481102	1.36732	0.152475	0.227134	1	8553	tags=53%, list=27%, signal=73%
GO_SARCOPLASMIC_RETICULUM_MEMBRANE	GO_SARCOPLASMIC_RETICULUM_MEMBRANE		35	0.446921	1.367	0.128099	0.22739	1	5436	tags=31%, list=17%, signal=38%
GO_GENE_SILENCING_BY_RNA	GO_GENE_SILENCING_BY_RNA		122	0.363301	1.36698	0.141949	0.227291	1	6818	tags=34%, list=21%, signal=44%
GO_REGULATION_OF_ESTABLISHMENT_OF_PROTEIN_LOCALIZATION_TO_MITOCHONDRION	GO_REGULATION_OF_ESTABLISHMENT_OF_PROTEIN_LOCALIZATION_TO_MITOCHONDRION		121	0.327569	1.36694	0.0893971	0.227214	1	8594	tags=45%, list=27%, signal=62%
GO_ICOSANOID_TRANSPORT	GO_ICOSANOID_TRANSPORT		19	0.430177	1.36688	0.0824742	0.227147	1	4851	tags=32%, list=15%, signal=37%
GO_FATTY_ACID_DERIVATIVE_TRANSPORT	GO_FATTY_ACID_DERIVATIVE_TRANSPORT		19	0.430177	1.36688	0.0824742	0.227028	1	4851	tags=32%, list=15%, signal=37%
GO_GAP_JUNCTION	GO_GAP_JUNCTION		27	0.420912	1.36674	0.122	0.227063	1	6851	tags=41%, list=22%, signal=52%
GO_TRANSCRIPTION_ELONGATION_FROM_RNA_POLYMERASE_II_PROMOTER	GO_TRANSCRIPTION_ELONGATION_FROM_RNA_POLYMERASE_II_PROMOTER		73	0.397442	1.3664	0.13125	0.227325	1	6208	tags=41%, list=20%, signal=51%
GO_NEGATIVE_REGULATION_OF_KIDNEY_DEVELOPMENT	GO_NEGATIVE_REGULATION_OF_KIDNEY_DEVELOPMENT		17	0.470447	1.36634	0.112	0.227265	1	4422	tags=29%, list=14%, signal=34%
GO_PLASMA_MEMBRANE_RECEPTOR_COMPLEX	GO_PLASMA_MEMBRANE_RECEPTOR_COMPLEX		171	0.324203	1.36605	0.0850202	0.227473	1	6396	tags=29%, list=20%, signal=36%
GO_CUL4_RING_E3_UBIQUITIN_LIGASE_COMPLEX	GO_CUL4_RING_E3_UBIQUITIN_LIGASE_COMPLEX		25	0.440386	1.36588	0.131579	0.227535	1	5382	tags=44%, list=17%, signal=53%
GO_RESPIRATORY_GASEOUS_EXCHANGE	GO_RESPIRATORY_GASEOUS_EXCHANGE		47	0.373676	1.36514	0.0928854	0.228261	1	3549	tags=21%, list=11%, signal=24%
GO_LOW_DENSITY_LIPOPROTEIN_PARTICLE_BINDING	GO_LOW_DENSITY_LIPOPROTEIN_PARTICLE_BINDING		15	0.464168	1.36405	0.113027	0.229332	1	1637	tags=27%, list=5%, signal=28%
GO_REGULATION_OF_CALCIUM_ION_TRANSPORT_INTO_CYTOSOL	GO_REGULATION_OF_CALCIUM_ION_TRANSPORT_INTO_CYTOSOL		87	0.35455	1.36379	0.112676	0.229482	1	7109	tags=37%, list=22%, signal=47%
GO_NEGATIVE_REGULATION_OF_ACTIN_FILAMENT_BUNDLE_ASSEMBLY	GO_NEGATIVE_REGULATION_OF_ACTIN_FILAMENT_BUNDLE_ASSEMBLY		19	0.485503	1.36337	0.140845	0.229764	1	6147	tags=47%, list=19%, signal=59%
GO_ER_ASSOCIATED_UBIQUITIN_DEPENDENT_PROTEIN_CATABOLIC_PROCESS	GO_ER_ASSOCIATED_UBIQUITIN_DEPENDENT_PROTEIN_CATABOLIC_PROCESS		60	0.422595	1.36302	0.165631	0.230026	1	3228	tags=32%, list=10%, signal=35%
GO_REGULATION_OF_RHO_PROTEIN_SIGNAL_TRANSDUCTION	GO_REGULATION_OF_RHO_PROTEIN_SIGNAL_TRANSDUCTION		106	0.33529	1.36292	0.114053	0.229999	1	6760	tags=35%, list=21%, signal=44%
GO_CORE_PROMOTER_BINDING	GO_CORE_PROMOTER_BINDING		144	0.324178	1.36291	0.10664	0.229901	1	5617	tags=29%, list=18%, signal=35%
GO_GLUTAMINE_METABOLIC_PROCESS	GO_GLUTAMINE_METABOLIC_PROCESS		22	0.448729	1.36279	0.116935	0.229908	1	4320	tags=32%, list=14%, signal=37%
GO_G_PROTEIN_ALPHA_SUBUNIT_BINDING	GO_G_PROTEIN_ALPHA_SUBUNIT_BINDING		22	0.427859	1.36229	0.0899796	0.230314	1	3422	tags=27%, list=11%, signal=31%
GO_POSITIVE_REGULATION_OF_CHROMOSOME_ORGANIZATION	GO_POSITIVE_REGULATION_OF_CHROMOSOME_ORGANIZATION		139	0.3267	1.36218	0.139959	0.230308	1	5094	tags=31%, list=16%, signal=37%
GO_CLATHRIN_COAT	GO_CLATHRIN_COAT		46	0.366392	1.36162	0.119835	0.230782	1	4726	tags=33%, list=15%, signal=38%
GO_REGULATION_OF_CLATHRIN_MEDIATED_ENDOCYTOSIS	GO_REGULATION_OF_CLATHRIN_MEDIATED_ENDOCYTOSIS		16	0.521028	1.36036	0.149701	0.232	1	4219	tags=44%, list=13%, signal=50%
GO_POSITIVE_REGULATION_OF_LIPASE_ACTIVITY	GO_POSITIVE_REGULATION_OF_LIPASE_ACTIVITY		66	0.375277	1.35959	0.095723	0.232762	1	5425	tags=35%, list=17%, signal=42%
GO_REGULATION_OF_HYDROGEN_PEROXIDE_INDUCED_CELL_DEATH	GO_REGULATION_OF_HYDROGEN_PEROXIDE_INDUCED_CELL_DEATH		17	0.442082	1.3595	0.0944558	0.232725	1	8117	tags=59%, list=26%, signal=79%
GO_POSITIVE_REGULATION_OF_MYOBLAST_DIFFERENTIATION	GO_POSITIVE_REGULATION_OF_MYOBLAST_DIFFERENTIATION		17	0.518497	1.35941	0.141104	0.232706	1	7841	tags=65%, list=25%, signal=86%
GO_EPIDERMIS_DEVELOPMENT	GO_EPIDERMIS_DEVELOPMENT		224	0.333095	1.35934	0.105809	0.232671	1	4355	tags=23%, list=14%, signal=26%
GO_POSITIVE_REGULATION_OF_MAP_KINASE_ACTIVITY	GO_POSITIVE_REGULATION_OF_MAP_KINASE_ACTIVITY		200	0.310894	1.35873	0.0651261	0.233258	1	6921	tags=33%, list=22%, signal=42%
GO_POSITIVE_REGULATION_OF_INTERFERON_BETA_PRODUCTION	GO_POSITIVE_REGULATION_OF_INTERFERON_BETA_PRODUCTION		30	0.440188	1.35852	0.15275	0.233378	1	7719	tags=60%, list=24%, signal=79%
GO_GAMETE_GENERATION	GO_GAMETE_GENERATION		476	0.279912	1.35851	0.0473118	0.233265	1	7286	tags=34%, list=23%, signal=43%
GO_IRE1_MEDIATED_UNFOLDED_PROTEIN_RESPONSE	GO_IRE1_MEDIATED_UNFOLDED_PROTEIN_RESPONSE		53	0.437563	1.35812	0.160825	0.233566	1	3370	tags=32%, list=11%, signal=36%
GO_NEGATIVE_REGULATION_OF_ALPHA_BETA_T_CELL_ACTIVATION	GO_NEGATIVE_REGULATION_OF_ALPHA_BETA_T_CELL_ACTIVATION		23	0.47872	1.35804	0.159184	0.233528	1	869	tags=22%, list=3%, signal=22%
GO_CELL_DEATH_IN_RESPONSE_TO_OXIDATIVE_STRESS	GO_CELL_DEATH_IN_RESPONSE_TO_OXIDATIVE_STRESS		18	0.434723	1.35802	0.0846774	0.233437	1	7783	tags=44%, list=24%, signal=59%
GO_NUCLEAR_SPECK	GO_NUCLEAR_SPECK		189	0.315551	1.35789	0.122661	0.233458	1	3791	tags=29%, list=12%, signal=33%
GO_PROTEIN_DNA_COMPLEX	GO_PROTEIN_DNA_COMPLEX		145	0.395531	1.3578	0.169772	0.233409	1	7545	tags=43%, list=24%, signal=57%
GO_RAB_GUANYL_NUCLEOTIDE_EXCHANGE_FACTOR_ACTIVITY	GO_RAB_GUANYL_NUCLEOTIDE_EXCHANGE_FACTOR_ACTIVITY		27	0.402761	1.35765	0.109562	0.233477	1	4485	tags=33%, list=14%, signal=39%
GO_NEGATIVE_REGULATION_OF_PEPTIDASE_ACTIVITY	GO_NEGATIVE_REGULATION_OF_PEPTIDASE_ACTIVITY		224	0.294557	1.35747	0.0420842	0.233586	1	4133	tags=20%, list=13%, signal=22%
GO_MULTI_ORGANISM_LOCALIZATION	GO_MULTI_ORGANISM_LOCALIZATION		65	0.410164	1.35731	0.184486	0.233605	1	4241	tags=32%, list=13%, signal=37%
GO_MULTI_ORGANISM_TRANSPORT	GO_MULTI_ORGANISM_TRANSPORT		65	0.410164	1.35731	0.184486	0.233486	1	4241	tags=32%, list=13%, signal=37%
GO_PHOSPHOLIPASE_BINDING	GO_PHOSPHOLIPASE_BINDING		19	0.46395	1.3569	0.129594	0.233789	1	7986	tags=53%, list=25%, signal=70%
GO_POSITIVE_REGULATION_OF_DENDRITE_DEVELOPMENT	GO_POSITIVE_REGULATION_OF_DENDRITE_DEVELOPMENT		63	0.382934	1.35681	0.132383	0.233786	1	4754	tags=29%, list=15%, signal=34%
GO_CARBOHYDRATE_BINDING	GO_CARBOHYDRATE_BINDING		254	0.321829	1.35596	0.107822	0.234576	1	5015	tags=24%, list=16%, signal=29%
GO_RESPONSE_TO_THYROID_HORMONE	GO_RESPONSE_TO_THYROID_HORMONE		21	0.4337	1.35594	0.121272	0.234473	1	4064	tags=29%, list=13%, signal=33%
GO_EMBRYO_IMPLANTATION	GO_EMBRYO_IMPLANTATION		35	0.386298	1.35589	0.0961145	0.234403	1	5161	tags=34%, list=16%, signal=41%
GO_TRANSCRIPTION_FACTOR_COMPLEX	GO_TRANSCRIPTION_FACTOR_COMPLEX		283	0.285797	1.35559	0.0680412	0.234577	1	4178	tags=24%, list=13%, signal=27%
GO_DENDRITE_CYTOPLASM	GO_DENDRITE_CYTOPLASM		16	0.481888	1.35472	0.116279	0.235416	1	6852	tags=50%, list=22%, signal=64%
GO_POSITIVE_REGULATION_OF_TRANSLATIONAL_INITIATION	GO_POSITIVE_REGULATION_OF_TRANSLATIONAL_INITIATION		21	0.440406	1.35352	0.156504	0.236582	1	7225	tags=48%, list=23%, signal=62%
GO_POSITIVE_REGULATION_OF_CALCIUM_ION_TRANSPORT	GO_POSITIVE_REGULATION_OF_CALCIUM_ION_TRANSPORT		102	0.326509	1.35309	0.0941423	0.236948	1	4008	tags=22%, list=13%, signal=25%
GO_ACTIVATION_OF_NF_KAPPAB_INDUCING_KINASE_ACTIVITY	GO_ACTIVATION_OF_NF_KAPPAB_INDUCING_KINASE_ACTIVITY		17	0.498079	1.353	0.139186	0.236948	1	5752	tags=47%, list=18%, signal=57%
GO_REGULATION_OF_NEURON_MIGRATION	GO_REGULATION_OF_NEURON_MIGRATION		26	0.429098	1.35285	0.10559	0.237016	1	3726	tags=27%, list=12%, signal=30%
GO_REGULATION_OF_CELLULAR_RESPIRATION	GO_REGULATION_OF_CELLULAR_RESPIRATION		22	0.440394	1.35277	0.125749	0.236987	1	3599	tags=23%, list=11%, signal=26%
GO_REGULATION_OF_PEPTIDASE_ACTIVITY	GO_REGULATION_OF_PEPTIDASE_ACTIVITY		366	0.294076	1.3523	0.063786	0.237315	1	4133	tags=20%, list=13%, signal=23%
GO_DNA_PACKAGING_COMPLEX	GO_DNA_PACKAGING_COMPLEX		81	0.457432	1.3523	0.199597	0.237199	1	7545	tags=43%, list=24%, signal=57%
GO_HETEROCHROMATIN	GO_HETEROCHROMATIN		65	0.368166	1.35218	0.142259	0.237207	1	7665	tags=42%, list=24%, signal=55%
GO_REGULATION_OF_MEMBRANE_DEPOLARIZATION	GO_REGULATION_OF_MEMBRANE_DEPOLARIZATION		39	0.371223	1.35212	0.116505	0.237143	1	7954	tags=46%, list=25%, signal=61%
GO_NEGATIVE_REGULATION_OF_PEPTIDYL_SERINE_PHOSPHORYLATION	GO_NEGATIVE_REGULATION_OF_PEPTIDYL_SERINE_PHOSPHORYLATION		21	0.406354	1.35167	0.105809	0.237514	1	4851	tags=43%, list=15%, signal=51%
GO_COPPER_ION_HOMEOSTASIS	GO_COPPER_ION_HOMEOSTASIS		16	0.460641	1.35165	0.139442	0.237424	1	7092	tags=50%, list=22%, signal=64%
GO_CRANIAL_NERVE_MORPHOGENESIS	GO_CRANIAL_NERVE_MORPHOGENESIS		23	0.448548	1.3516	0.132653	0.237342	1	4422	tags=35%, list=14%, signal=40%
GO_HETEROTRIMERIC_G_PROTEIN_COMPLEX	GO_HETEROTRIMERIC_G_PROTEIN_COMPLEX		31	0.441984	1.35045	0.138554	0.238565	1	6002	tags=29%, list=19%, signal=36%
GO_POSITIVE_REGULATION_OF_I_KAPPAB_KINASE_NF_KAPPAB_SIGNALING	GO_POSITIVE_REGULATION_OF_I_KAPPAB_KINASE_NF_KAPPAB_SIGNALING		177	0.330198	1.35015	0.115226	0.238765	1	5357	tags=29%, list=17%, signal=34%
GO_MRNA_BINDING	GO_MRNA_BINDING		143	0.329153	1.35013	0.135903	0.238658	1	6322	tags=36%, list=20%, signal=45%
GO_REGULATION_OF_CHEMOTAXIS	GO_REGULATION_OF_CHEMOTAXIS		174	0.354541	1.35001	0.129098	0.238688	1	8311	tags=41%, list=26%, signal=56%
GO_CELL_PROLIFERATION_IN_FOREBRAIN	GO_CELL_PROLIFERATION_IN_FOREBRAIN		27	0.432415	1.34985	0.112245	0.238751	1	6957	tags=52%, list=22%, signal=66%
GO_POSITIVE_REGULATION_OF_CELL_ADHESION	GO_POSITIVE_REGULATION_OF_CELL_ADHESION		361	0.349101	1.34977	0.147844	0.238725	1	7934	tags=39%, list=25%, signal=51%
GO_MEMBRANE_LIPID_BIOSYNTHETIC_PROCESS	GO_MEMBRANE_LIPID_BIOSYNTHETIC_PROCESS		106	0.329944	1.34973	0.0855397	0.238653	1	6460	tags=35%, list=20%, signal=44%
GO_REGULATION_OF_MICROTUBULE_POLYMERIZATION	GO_REGULATION_OF_MICROTUBULE_POLYMERIZATION		31	0.402995	1.34949	0.137652	0.238819	1	2774	tags=23%, list=9%, signal=25%
GO_REGULATION_OF_PROTEIN_LOCALIZATION_TO_CELL_SURFACE	GO_REGULATION_OF_PROTEIN_LOCALIZATION_TO_CELL_SURFACE		27	0.409622	1.34934	0.0884774	0.238871	1	6395	tags=33%, list=20%, signal=42%
GO_LUNG_CELL_DIFFERENTIATION	GO_LUNG_CELL_DIFFERENTIATION		25	0.462497	1.3492	0.138493	0.238894	1	8809	tags=56%, list=28%, signal=77%
GO_POSITIVE_REGULATION_OF_MICROTUBULE_POLYMERIZATION_OR_DEPOLYMERIZATION	GO_POSITIVE_REGULATION_OF_MICROTUBULE_POLYMERIZATION_OR_DEPOLYMERIZATION		22	0.409708	1.34919	0.125	0.238786	1	7273	tags=45%, list=23%, signal=59%
GO_GENE_SILENCING	GO_GENE_SILENCING		178	0.340879	1.34908	0.141053	0.238789	1	4241	tags=23%, list=13%, signal=26%
GO_BODY_FLUID_SECRETION	GO_BODY_FLUID_SECRETION		66	0.338506	1.34882	0.0785124	0.238945	1	6680	tags=36%, list=21%, signal=46%
GO_REGULATION_OF_INTRACELLULAR_STEROID_HORMONE_RECEPTOR_SIGNALING_PATHWAY	GO_REGULATION_OF_INTRACELLULAR_STEROID_HORMONE_RECEPTOR_SIGNALING_PATHWAY		56	0.361667	1.3488	0.117043	0.238855	1	7063	tags=39%, list=22%, signal=50%
GO_REGULATION_OF_LIPID_CATABOLIC_PROCESS	GO_REGULATION_OF_LIPID_CATABOLIC_PROCESS		51	0.363241	1.34876	0.0909091	0.238781	1	4658	tags=29%, list=15%, signal=34%
GO_MIDDLE_EAR_MORPHOGENESIS	GO_MIDDLE_EAR_MORPHOGENESIS		20	0.459047	1.34836	0.117647	0.239093	1	5031	tags=40%, list=16%, signal=47%
GO_INTERMEDIATE_FILAMENT_BASED_PROCESS	GO_INTERMEDIATE_FILAMENT_BASED_PROCESS		41	0.388908	1.3478	0.110417	0.239561	1	8025	tags=41%, list=25%, signal=55%
GO_GLUCOSAMINE_CONTAINING_COMPOUND_METABOLIC_PROCESS	GO_GLUCOSAMINE_CONTAINING_COMPOUND_METABOLIC_PROCESS		25	0.410038	1.34779	0.125749	0.239454	1	4115	tags=36%, list=13%, signal=41%
GO_VASOCONSTRICTION	GO_VASOCONSTRICTION		27	0.412624	1.34777	0.103314	0.239364	1	5677	tags=37%, list=18%, signal=45%
GO_REGULATION_OF_HISTONE_METHYLATION	GO_REGULATION_OF_HISTONE_METHYLATION		50	0.377255	1.34775	0.126	0.239264	1	5906	tags=40%, list=19%, signal=49%
GO_CELLULAR_RESPONSE_TO_CAMP	GO_CELLULAR_RESPONSE_TO_CAMP		49	0.366978	1.34774	0.0914634	0.239145	1	7055	tags=43%, list=22%, signal=55%
GO_REGULATION_OF_CILIUM_ASSEMBLY	GO_REGULATION_OF_CILIUM_ASSEMBLY		45	0.368779	1.34737	0.114458	0.239425	1	3799	tags=29%, list=12%, signal=33%
GO_REGULATION_OF_SYSTEMIC_ARTERIAL_BLOOD_PRESSURE_MEDIATED_BY_A_CHEMICAL_SIGNAL	GO_REGULATION_OF_SYSTEMIC_ARTERIAL_BLOOD_PRESSURE_MEDIATED_BY_A_CHEMICAL_SIGNAL		44	0.401526	1.3473	0.106542	0.239378	1	6045	tags=34%, list=19%, signal=42%
GO_REGULATION_OF_SEQUENCE_SPECIFIC_DNA_BINDING_TRANSCRIPTION_FACTOR_ACTIVITY	GO_REGULATION_OF_SEQUENCE_SPECIFIC_DNA_BINDING_TRANSCRIPTION_FACTOR_ACTIVITY		351	0.283215	1.34679	0.0595745	0.239852	1	4618	tags=23%, list=15%, signal=27%
GO_MYOFILAMENT	GO_MYOFILAMENT		22	0.422933	1.3466	0.122736	0.239934	1	2911	tags=27%, list=9%, signal=30%
GO_NUCLEAR_CHROMATIN	GO_NUCLEAR_CHROMATIN		271	0.31272	1.34596	0.12	0.240575	1	7665	tags=38%, list=24%, signal=50%
GO_PSEUDOPODIUM	GO_PSEUDOPODIUM		16	0.499557	1.34491	0.138889	0.241593	1	5040	tags=38%, list=16%, signal=45%
GO_ENDOPLASMIC_RETICULUM_ORGANIZATION	GO_ENDOPLASMIC_RETICULUM_ORGANIZATION		36	0.420266	1.34447	0.155925	0.241962	1	6460	tags=44%, list=20%, signal=56%
GO_T_CELL_APOPTOTIC_PROCESS	GO_T_CELL_APOPTOTIC_PROCESS		15	0.483074	1.3433	0.14553	0.243166	1	3019	tags=33%, list=10%, signal=37%
GO_ACTIN_MEDIATED_CELL_CONTRACTION	GO_ACTIN_MEDIATED_CELL_CONTRACTION		71	0.352381	1.34218	0.10495	0.244349	1	4575	tags=30%, list=14%, signal=34%
GO_REGULATION_OF_MUSCLE_CELL_APOPTOTIC_PROCESS	GO_REGULATION_OF_MUSCLE_CELL_APOPTOTIC_PROCESS		42	0.344784	1.34216	0.0967118	0.244243	1	4748	tags=29%, list=15%, signal=34%
GO_PROTEIN_ACYLATION	GO_PROTEIN_ACYLATION		142	0.312317	1.34195	0.117526	0.244376	1	5547	tags=30%, list=17%, signal=37%
GO_STEROL_BINDING	GO_STEROL_BINDING		42	0.368299	1.3415	0.0948454	0.244767	1	6405	tags=43%, list=20%, signal=54%
GO_NEGATIVE_REGULATION_OF_CELL_GROWTH	GO_NEGATIVE_REGULATION_OF_CELL_GROWTH		163	0.297465	1.34133	0.0862423	0.244849	1	5664	tags=28%, list=18%, signal=33%
[truncated: 28 more rows]

## Sheet: Table S5-High ADH5-C2-KEGG
NAME	GS<br> follow link to MSigDB	GS DETAILS	SIZE	ES	NES	NOM p-val	FDR q-val	FWER p-val	RANK AT MAX	LEADING EDGE
KEGG_TGF_BETA_SIGNALING_PATHWAY	KEGG_TGF_BETA_SIGNALING_PATHWAY	Details ...	85	0.640131	2.29197	0	0.000962264	0.001	5031	tags=55%, list=16%, signal=66%
KEGG_ADHERENS_JUNCTION	KEGG_ADHERENS_JUNCTION	Details ...	68	0.644419	2.17108	0	0.00577545	0.008	5866	tags=56%, list=18%, signal=68%
KEGG_FOCAL_ADHESION	KEGG_FOCAL_ADHESION	Details ...	197	0.610377	2.1488	0	0.00511341	0.01	3489	tags=42%, list=11%, signal=47%
KEGG_WNT_SIGNALING_PATHWAY	KEGG_WNT_SIGNALING_PATHWAY	Details ...	145	0.491148	2.09818	0	0.00771315	0.017	4829	tags=36%, list=15%, signal=42%
KEGG_REGULATION_OF_ACTIN_CYTOSKELETON	KEGG_REGULATION_OF_ACTIN_CYTOSKELETON	Details ...	206	0.516114	2.06555	0	0.0107049	0.03	5591	tags=44%, list=18%, signal=53%
KEGG_COLORECTAL_CANCER	KEGG_COLORECTAL_CANCER	Details ...	62	0.573674	2.04955	0	0.0109987	0.037	4328	tags=42%, list=14%, signal=48%
KEGG_ECM_RECEPTOR_INTERACTION	KEGG_ECM_RECEPTOR_INTERACTION	Details ...	83	0.662778	2.03916	0.00399202	0.0102183	0.039	4626	tags=53%, list=15%, signal=62%
KEGG_ARRHYTHMOGENIC_RIGHT_VENTRICULAR_CARDIOMYOPATHY_ARVC	KEGG_ARRHYTHMOGENIC_RIGHT_VENTRICULAR_CARDIOMYOPATHY_ARVC	Details ...	74	0.550609	1.93697	0.00205339	0.0291612	0.106	5710	tags=46%, list=18%, signal=56%
KEGG_ENDOMETRIAL_CANCER	KEGG_ENDOMETRIAL_CANCER	Details ...	52	0.57177	1.92669	0.00212314	0.0303003	0.119	4328	tags=44%, list=14%, signal=51%
KEGG_PATHWAYS_IN_CANCER	KEGG_PATHWAYS_IN_CANCER	Details ...	319	0.46674	1.90449	0.00208333	0.0343742	0.143	7191	tags=47%, list=23%, signal=60%
KEGG_RENAL_CELL_CARCINOMA	KEGG_RENAL_CELL_CARCINOMA	Details ...	68	0.530765	1.88576	0.0041841	0.0396356	0.16	3403	tags=37%, list=11%, signal=41%
KEGG_OOCYTE_MEIOSIS	KEGG_OOCYTE_MEIOSIS	Details ...	107	0.478173	1.84577	0	0.0562198	0.207	4734	tags=42%, list=15%, signal=49%
KEGG_MELANOMA	KEGG_MELANOMA	Details ...	68	0.495921	1.83865	0	0.0563536	0.22	5617	tags=46%, list=18%, signal=55%
KEGG_NEUROTROPHIN_SIGNALING_PATHWAY	KEGG_NEUROTROPHIN_SIGNALING_PATHWAY	Details ...	125	0.461131	1.82856	0.00208768	0.0574567	0.233	5073	tags=39%, list=16%, signal=46%
KEGG_GAP_JUNCTION	KEGG_GAP_JUNCTION	Details ...	88	0.467114	1.82516	0	0.0552281	0.237	8001	tags=50%, list=25%, signal=67%
KEGG_PANCREATIC_CANCER	KEGG_PANCREATIC_CANCER	Details ...	69	0.528015	1.81586	0.00610998	0.0564968	0.256	6856	tags=51%, list=22%, signal=65%
KEGG_PROSTATE_CANCER	KEGG_PROSTATE_CANCER	Details ...	89	0.51039	1.8146	0	0.0540102	0.257	4385	tags=38%, list=14%, signal=44%
KEGG_MELANOGENESIS	KEGG_MELANOGENESIS	Details ...	99	0.441671	1.80717	0.00203252	0.0562004	0.273	5815	tags=35%, list=18%, signal=43%
KEGG_AXON_GUIDANCE	KEGG_AXON_GUIDANCE	Details ...	126	0.455018	1.79748	0.00790514	0.0584118	0.293	3972	tags=30%, list=13%, signal=34%
KEGG_UBIQUITIN_MEDIATED_PROTEOLYSIS	KEGG_UBIQUITIN_MEDIATED_PROTEOLYSIS	Details ...	133	0.448619	1.78846	0.0141129	0.0609134	0.311	6208	tags=50%, list=20%, signal=61%
KEGG_GLYCOLYSIS_GLUCONEOGENESIS	KEGG_GLYCOLYSIS_GLUCONEOGENESIS	Details ...	58	0.50363	1.77054	0.0190476	0.0690856	0.341	5810	tags=41%, list=18%, signal=51%
KEGG_O_GLYCAN_BIOSYNTHESIS	KEGG_O_GLYCAN_BIOSYNTHESIS	Details ...	26	0.619414	1.76366	0.0125523	0.0709859	0.354	7206	tags=54%, list=23%, signal=70%
KEGG_CELL_CYCLE	KEGG_CELL_CYCLE	Details ...	124	0.52343	1.76186	0.0427184	0.068744	0.358	6146	tags=52%, list=19%, signal=64%
KEGG_SMALL_CELL_LUNG_CANCER	KEGG_SMALL_CELL_LUNG_CANCER	Details ...	84	0.498325	1.75787	0.0163599	0.0681892	0.365	6878	tags=51%, list=22%, signal=65%
KEGG_PATHOGENIC_ESCHERICHIA_COLI_INFECTION	KEGG_PATHOGENIC_ESCHERICHIA_COLI_INFECTION	Details ...	56	0.535738	1.73625	0.0143737	0.0776815	0.407	3085	tags=32%, list=10%, signal=36%
KEGG_CHRONIC_MYELOID_LEUKEMIA	KEGG_CHRONIC_MYELOID_LEUKEMIA	Details ...	73	0.488039	1.72742	0.0103093	0.0814866	0.426	4829	tags=37%, list=15%, signal=44%
KEGG_ERBB_SIGNALING_PATHWAY	KEGG_ERBB_SIGNALING_PATHWAY	Details ...	86	0.436908	1.72441	0.0103093	0.0804336	0.433	4716	tags=34%, list=15%, signal=39%
KEGG_HYPERTROPHIC_CARDIOMYOPATHY_HCM	KEGG_HYPERTROPHIC_CARDIOMYOPATHY_HCM	Details ...	83	0.462033	1.70608	0.0118343	0.0899488	0.47	5710	tags=39%, list=18%, signal=47%
KEGG_BASAL_CELL_CARCINOMA	KEGG_BASAL_CELL_CARCINOMA	Details ...	54	0.486211	1.69229	0.0240481	0.0962198	0.492	5743	tags=39%, list=18%, signal=47%
KEGG_HEDGEHOG_SIGNALING_PATHWAY	KEGG_HEDGEHOG_SIGNALING_PATHWAY	Details ...	53	0.472961	1.68896	0.026	0.0951232	0.497	5743	tags=40%, list=18%, signal=48%
KEGG_DILATED_CARDIOMYOPATHY	KEGG_DILATED_CARDIOMYOPATHY	Details ...	89	0.460877	1.68504	0.0119284	0.0949361	0.5	5710	tags=38%, list=18%, signal=46%
KEGG_GLIOMA	KEGG_GLIOMA	Details ...	65	0.462083	1.67427	0.0165289	0.0993568	0.518	7853	tags=51%, list=25%, signal=67%
KEGG_PROGESTERONE_MEDIATED_OOCYTE_MATURATION	KEGG_PROGESTERONE_MEDIATED_OOCYTE_MATURATION	Details ...	83	0.425459	1.66957	0.01	0.0999736	0.527	5997	tags=42%, list=19%, signal=52%
KEGG_AMINO_SUGAR_AND_NUCLEOTIDE_SUGAR_METABOLISM	KEGG_AMINO_SUGAR_AND_NUCLEOTIDE_SUGAR_METABOLISM	Details ...	44	0.518065	1.65899	0.0472279	0.104677	0.54	4776	tags=43%, list=15%, signal=51%
KEGG_GLYCOSAMINOGLYCAN_BIOSYNTHESIS_CHONDROITIN_SULFATE	KEGG_GLYCOSAMINOGLYCAN_BIOSYNTHESIS_CHONDROITIN_SULFATE	Details ...	22	0.606381	1.6388	0.028866	0.117475	0.58	2836	tags=41%, list=9%, signal=45%
KEGG_PRION_DISEASES	KEGG_PRION_DISEASES	Details ...	34	0.502075	1.60837	0.0360721	0.139393	0.632	4524	tags=29%, list=14%, signal=34%
KEGG_THYROID_CANCER	KEGG_THYROID_CANCER	Details ...	29	0.502507	1.60215	0.0306748	0.1404	0.645	4328	tags=38%, list=14%, signal=44%
KEGG_INSULIN_SIGNALING_PATHWAY	KEGG_INSULIN_SIGNALING_PATHWAY	Details ...	135	0.376261	1.60075	0.0213178	0.13834	0.649	4914	tags=33%, list=15%, signal=39%
KEGG_GLYCOSAMINOGLYCAN_BIOSYNTHESIS_HEPARAN_SULFATE	KEGG_GLYCOSAMINOGLYCAN_BIOSYNTHESIS_HEPARAN_SULFATE	Details ...	26	0.506712	1.59976	0.0168776	0.135466	0.65	1945	tags=27%, list=6%, signal=29%
KEGG_LONG_TERM_POTENTIATION	KEGG_LONG_TERM_POTENTIATION	Details ...	67	0.417092	1.57094	0.0309278	0.157191	0.699	7773	tags=45%, list=24%, signal=59%
KEGG_GLYCOSPHINGOLIPID_BIOSYNTHESIS_GANGLIO_SERIES	KEGG_GLYCOSPHINGOLIPID_BIOSYNTHESIS_GANGLIO_SERIES	Details ...	15	0.56868	1.56357	0.0349794	0.160402	0.709	7206	tags=60%, list=23%, signal=78%
KEGG_TIGHT_JUNCTION	KEGG_TIGHT_JUNCTION	Details ...	126	0.383172	1.55998	0.0400802	0.160027	0.717	3405	tags=27%, list=11%, signal=30%
KEGG_BASAL_TRANSCRIPTION_FACTORS	KEGG_BASAL_TRANSCRIPTION_FACTORS	Details ...	33	0.46	1.55948	0.0547667	0.156856	0.719	4107	tags=36%, list=13%, signal=42%
KEGG_VASCULAR_SMOOTH_MUSCLE_CONTRACTION	KEGG_VASCULAR_SMOOTH_MUSCLE_CONTRACTION	Details ...	113	0.400904	1.55726	0.0415842	0.155334	0.721	4756	tags=33%, list=15%, signal=38%
KEGG_LYSOSOME	KEGG_LYSOSOME	Details ...	119	0.431503	1.55604	0.0714286	0.153042	0.724	6402	tags=41%, list=20%, signal=51%
KEGG_MAPK_SIGNALING_PATHWAY	KEGG_MAPK_SIGNALING_PATHWAY	Details ...	258	0.34282	1.55032	0.0247934	0.154168	0.73	5102	tags=26%, list=16%, signal=31%
KEGG_ENDOCYTOSIS	KEGG_ENDOCYTOSIS	Details ...	176	0.354577	1.53279	0.0343434	0.165942	0.752	7989	tags=44%, list=25%, signal=59%
KEGG_N_GLYCAN_BIOSYNTHESIS	KEGG_N_GLYCAN_BIOSYNTHESIS	Details ...	46	0.494984	1.52673	0.0950413	0.167878	0.756	6966	tags=50%, list=22%, signal=64%
KEGG_FC_GAMMA_R_MEDIATED_PHAGOCYTOSIS	KEGG_FC_GAMMA_R_MEDIATED_PHAGOCYTOSIS	Details ...	93	0.399204	1.51176	0.0751073	0.177843	0.773	7027	tags=38%, list=22%, signal=48%
KEGG_GALACTOSE_METABOLISM	KEGG_GALACTOSE_METABOLISM	Details ...	25	0.476329	1.51144	0.0646388	0.174863	0.773	7282	tags=52%, list=23%, signal=67%
KEGG_GLYCOSAMINOGLYCAN_DEGRADATION	KEGG_GLYCOSAMINOGLYCAN_DEGRADATION	Details ...	20	0.54145	1.50876	0.0764706	0.17417	0.775	5270	tags=50%, list=17%, signal=60%
KEGG_ACUTE_MYELOID_LEUKEMIA	KEGG_ACUTE_MYELOID_LEUKEMIA	Details ...	57	0.444951	1.50146	0.0811966	0.177932	0.787	4716	tags=32%, list=15%, signal=37%
KEGG_VASOPRESSIN_REGULATED_WATER_REABSORPTION	KEGG_VASOPRESSIN_REGULATED_WATER_REABSORPTION	Details ...	42	0.437901	1.49593	0.0555556	0.179894	0.795	7170	tags=43%, list=23%, signal=55%
KEGG_VIRAL_MYOCARDITIS	KEGG_VIRAL_MYOCARDITIS	Details ...	68	0.470657	1.48718	0.112676	0.186187	0.813	7889	tags=50%, list=25%, signal=66%
KEGG_STARCH_AND_SUCROSE_METABOLISM	KEGG_STARCH_AND_SUCROSE_METABOLISM	Details ...	49	0.461676	1.48212	0.0600775	0.187235	0.817	7282	tags=47%, list=23%, signal=61%
KEGG_LONG_TERM_DEPRESSION	KEGG_LONG_TERM_DEPRESSION	Details ...	69	0.372407	1.47686	0.028866	0.189018	0.823	6546	tags=36%, list=21%, signal=46%
KEGG_LEUKOCYTE_TRANSENDOTHELIAL_MIGRATION	KEGG_LEUKOCYTE_TRANSENDOTHELIAL_MIGRATION	Details ...	112	0.403415	1.47674	0.0977131	0.185935	0.823	6931	tags=38%, list=22%, signal=48%
KEGG_EPITHELIAL_CELL_SIGNALING_IN_HELICOBACTER_PYLORI_INFECTION	KEGG_EPITHELIAL_CELL_SIGNALING_IN_HELICOBACTER_PYLORI_INFECTION	Details ...	66	0.376509	1.46435	0.059322	0.195031	0.834	3539	tags=24%, list=11%, signal=27%
KEGG_SPHINGOLIPID_METABOLISM	KEGG_SPHINGOLIPID_METABOLISM	Details ...	35	0.454582	1.46069	0.0779727	0.195007	0.838	7491	tags=54%, list=24%, signal=71%
KEGG_DORSO_VENTRAL_AXIS_FORMATION	KEGG_DORSO_VENTRAL_AXIS_FORMATION	Details ...	24	0.464727	1.45869	0.0689655	0.193294	0.84	7853	tags=54%, list=25%, signal=72%
KEGG_GNRH_SIGNALING_PATHWAY	KEGG_GNRH_SIGNALING_PATHWAY	Details ...	98	0.331676	1.43773	0.0360721	0.211495	0.864	4734	tags=24%, list=15%, signal=29%
KEGG_LEISHMANIA_INFECTION	KEGG_LEISHMANIA_INFECTION	Details ...	70	0.467637	1.41847	0.173653	0.227513	0.874	5711	tags=37%, list=18%, signal=45%

## Sheet: Table S6-High ADH6-C5-GO
NAME	GS<br> follow link to MSigDB	GS DETAILS	SIZE	ES	NES	NOM p-val	FDR q-val	FWER p-val	RANK AT MAX	LEADING EDGE
GO_PRIMARY_ALCOHOL_METABOLIC_PROCESS	GO_PRIMARY_ALCOHOL_METABOLIC_PROCESS	Details ...	46	0.592698	2.10164	0	0.123817	0.126	4416	tags=41%, list=14%, signal=48%

## Sheet: Table S7-High ADH6-C2-KEGG
NAME	GS<br> follow link to MSigDB	GS DETAILS	SIZE	ES	NES	NOM p-val	FDR q-val	FWER p-val	RANK AT MAX	LEADING EDGE
KEGG_FATTY_ACID_METABOLISM	KEGG_FATTY_ACID_METABOLISM	Details ...	42	0.651941	1.99078	0	0.0549945	0.06	3668	tags=40%, list=12%, signal=46%
KEGG_RETINOL_METABOLISM	KEGG_RETINOL_METABOLISM	Details ...	61	0.596628	1.9901	0	0.0280385	0.06	5622	tags=49%, list=18%, signal=60%
KEGG_LINOLEIC_ACID_METABOLISM	KEGG_LINOLEIC_ACID_METABOLISM	Details ...	28	0.664467	1.98588	0.00191205	0.0188375	0.06	1317	tags=39%, list=4%, signal=41%
KEGG_ARACHIDONIC_ACID_METABOLISM	KEGG_ARACHIDONIC_ACID_METABOLISM	Details ...	55	0.53724	1.93828	0	0.0276818	0.103	1779	tags=33%, list=6%, signal=35%
KEGG_DRUG_METABOLISM_CYTOCHROME_P450	KEGG_DRUG_METABOLISM_CYTOCHROME_P450	Details ...	68	0.576815	1.93141	0.00197239	0.0234886	0.104	3876	tags=41%, list=12%, signal=47%
KEGG_BUTANOATE_METABOLISM	KEGG_BUTANOATE_METABOLISM	Details ...	33	0.61177	1.90694	0.00390625	0.0259977	0.133	4689	tags=42%, list=15%, signal=50%
KEGG_HISTIDINE_METABOLISM	KEGG_HISTIDINE_METABOLISM	Details ...	28	0.564124	1.90043	0.00410678	0.0243873	0.144	4851	tags=46%, list=15%, signal=55%
KEGG_MATURITY_ONSET_DIABETES_OF_THE_YOUNG	KEGG_MATURITY_ONSET_DIABETES_OF_THE_YOUNG	Details ...	25	0.706199	1.85408	0.00191571	0.0352116	0.206	3917	tags=56%, list=12%, signal=64%
KEGG_METABOLISM_OF_XENOBIOTICS_BY_CYTOCHROME_P450	KEGG_METABOLISM_OF_XENOBIOTICS_BY_CYTOCHROME_P450	Details ...	66	0.564493	1.84758	0.0019802	0.0324224	0.211	3876	tags=42%, list=12%, signal=48%
KEGG_PROXIMAL_TUBULE_BICARBONATE_RECLAMATION	KEGG_PROXIMAL_TUBULE_BICARBONATE_RECLAMATION	Details ...	22	0.638697	1.8269	0.00998004	0.0370693	0.253	5222	tags=55%, list=16%, signal=65%
KEGG_TYROSINE_METABOLISM	KEGG_TYROSINE_METABOLISM	Details ...	42	0.519047	1.81877	0	0.0358972	0.263	4851	tags=38%, list=15%, signal=45%
KEGG_PRIMARY_BILE_ACID_BIOSYNTHESIS	KEGG_PRIMARY_BILE_ACID_BIOSYNTHESIS	Details ...	16	0.646742	1.79481	0.0115385	0.0406948	0.296	3814	tags=50%, list=12%, signal=57%
KEGG_STEROID_HORMONE_BIOSYNTHESIS	KEGG_STEROID_HORMONE_BIOSYNTHESIS	Details ...	52	0.490811	1.67449	0.0118577	0.101215	0.506	9054	tags=56%, list=28%, signal=78%
KEGG_PEROXISOME	KEGG_PEROXISOME	Details ...	78	0.485612	1.64799	0.028169	0.112567	0.549	8263	tags=49%, list=26%, signal=66%
KEGG_PROPANOATE_METABOLISM	KEGG_PROPANOATE_METABOLISM	Details ...	32	0.565085	1.63444	0.0330578	0.115669	0.586	4184	tags=44%, list=13%, signal=50%
KEGG_PYRUVATE_METABOLISM	KEGG_PYRUVATE_METABOLISM	Details ...	38	0.49832	1.61923	0.0381526	0.12063	0.614	4689	tags=42%, list=15%, signal=49%
KEGG_NITROGEN_METABOLISM	KEGG_NITROGEN_METABOLISM	Details ...	23	0.500961	1.55793	0.0395833	0.167395	0.721	1570	tags=30%, list=5%, signal=32%
KEGG_ALPHA_LINOLENIC_ACID_METABOLISM	KEGG_ALPHA_LINOLENIC_ACID_METABOLISM	Details ...	18	0.504972	1.5471	0.0292969	0.168366	0.729	1317	tags=22%, list=4%, signal=23%
KEGG_PHENYLALANINE_METABOLISM	KEGG_PHENYLALANINE_METABOLISM	Details ...	18	0.507723	1.54654	0.0359281	0.160064	0.731	4851	tags=39%, list=15%, signal=46%
KEGG_ARGININE_AND_PROLINE_METABOLISM	KEGG_ARGININE_AND_PROLINE_METABOLISM	Details ...	52	0.44816	1.52802	0.054326	0.169467	0.762	3709	tags=31%, list=12%, signal=35%
KEGG_SELENOAMINO_ACID_METABOLISM	KEGG_SELENOAMINO_ACID_METABOLISM	Details ...	26	0.478776	1.50505	0.0567951	0.182097	0.793	4193	tags=35%, list=13%, signal=40%
KEGG_STEROID_BIOSYNTHESIS	KEGG_STEROID_BIOSYNTHESIS	Details ...	16	0.606999	1.50105	0.0826613	0.177463	0.797	5337	tags=56%, list=17%, signal=68%
KEGG_GLYCOSPHINGOLIPID_BIOSYNTHESIS_LACTO_AND_NEOLACTO_SERIES	KEGG_GLYCOSPHINGOLIPID_BIOSYNTHESIS_LACTO_AND_NEOLACTO_SERIES	Details ...	24	0.460989	1.48394	0.0853175	0.186241	0.822	4512	tags=33%, list=14%, signal=39%
KEGG_VALINE_LEUCINE_AND_ISOLEUCINE_DEGRADATION	KEGG_VALINE_LEUCINE_AND_ISOLEUCINE_DEGRADATION	Details ...	44	0.499171	1.45879	0.121212	0.201133	0.843	7931	tags=52%, list=25%, signal=70%
KEGG_BETA_ALANINE_METABOLISM	KEGG_BETA_ALANINE_METABOLISM	Details ...	22	0.491811	1.4556	0.0752033	0.19623	0.848	8701	tags=50%, list=27%, signal=69%
KEGG_ASCORBATE_AND_ALDARATE_METABOLISM	KEGG_ASCORBATE_AND_ALDARATE_METABOLISM	Details ...	23	0.522765	1.43958	0.0963115	0.205248	0.872	3150	tags=35%, list=10%, signal=39%
KEGG_GLUTATHIONE_METABOLISM	KEGG_GLUTATHIONE_METABOLISM	Details ...	46	0.44011	1.43472	0.116327	0.20195	0.874	6156	tags=37%, list=19%, signal=46%
KEGG_PPAR_SIGNALING_PATHWAY	KEGG_PPAR_SIGNALING_PATHWAY	Details ...	68	0.386955	1.43075	0.0834915	0.198467	0.881	6910	tags=38%, list=22%, signal=49%
KEGG_ABC_TRANSPORTERS	KEGG_ABC_TRANSPORTERS	Details ...	44	0.383576	1.42683	0.0699433	0.195087	0.883	7048	tags=39%, list=22%, signal=50%
KEGG_GLYCOLYSIS_GLUCONEOGENESIS	KEGG_GLYCOLYSIS_GLUCONEOGENESIS	Details ...	58	0.392619	1.37439	0.138614	0.239799	0.923	4003	tags=33%, list=13%, signal=37%
